# Supplementary material for: Quantum chemical study and isothermal titration calorimetry of β-cyclodextrin complexes with mianserin in aqueous solution
Source: Royal Society of Chemistry journal article supplement (doi:10.1039/c6ob02109c), 2017-01-01
Supplement: c6ob02109c1.pdf [file c6ob02109c1.pdf]

## ***Supporting Information***

### **Quantum chemical study and isothermal titration calorimetry of $\beta$ -cyclodextrin complexes with mianserin in aqueous solution**

Anna Ignaczak<sup>\*a</sup>, Bartłomiej Pałecz<sup>b</sup>, Sylwia Belica-Pacha<sup>b</sup>

<sup>a</sup> Department of Theoretical and Structural Chemistry, Faculty of Chemistry,  
University of Lodz, Pomorska 163/165, 90-236 Lodz, Poland.  
E-mail: [anignacz@uni.lodz.pl](mailto:anignacz@uni.lodz.pl)

<sup>b</sup> Unit of Biophysical Chemistry, Department of Physical Chemistry, Faculty of Chemistry,  
University of Lodz, Pomorska 165, 90-236 Lodz, Poland

The optimized structures and corresponding total energies E [hartree] of mianserin,  $\beta$ -CD and their complexes 1:1 and 1:2 in vacuo and in water (PCM) obtained with the B3LYP/6-31G(d,p) method. For the structures presented in the manuscript in Table 2 additionally the zero-point energies ZPE, enthalpies H and free energies G (all in hartree) and total entropies S [cal/mol·K] are given (uncorrected values from Gaussian 09 calculations).

| MIA S VACUUM |               |           |           | MIA R VACUUM |               |           |           |
|--------------|---------------|-----------|-----------|--------------|---------------|-----------|-----------|
| E            | -807.48184937 |           |           | E            | -807.48184937 |           |           |
| ZPE          | -807.137341   |           |           | ZPE          | -807.137341   |           |           |
| H            | -807.120788   |           |           | H            | -807.120788   |           |           |
| G            | -807.179489   |           |           | G            | -807.179489   |           |           |
| S            | 123.546       |           |           | S            | 123.546       |           |           |
| Atom         | x [Å]         | y [Å]     | z [Å]     | Atom         | x [Å]         | y [Å]     | z [Å]     |
| C            | -1.201907     | 3.909782  | -0.102717 | C            | 1.201899      | 3.909785  | -0.102717 |
| C            | -0.249819     | 3.720846  | -1.102757 | C            | 0.249812      | 3.720846  | -1.102756 |
| C            | 0.392566      | 2.489550  | -1.212097 | C            | -0.392571     | 2.489549  | -1.212096 |
| C            | 0.113385      | 1.430295  | -0.336768 | C            | -0.113388     | 1.430294  | -0.336768 |
| C            | -0.864127     | 1.616926  | 0.658860  | C            | 0.864125      | 1.616928  | 0.658860  |
| C            | -1.506483     | 2.857160  | 0.758034  | C            | 1.506478      | 2.857163  | 0.758034  |
| C            | -1.306190     | 0.466723  | 1.543915  | C            | 1.306192      | 0.466725  | 1.543914  |
| C            | -1.842448     | -0.659142 | 0.692177  | C            | 1.842449      | -0.659139 | 0.692176  |
| C            | -3.198932     | -0.975166 | 0.637037  | C            | 3.198934      | -0.975163 | 0.637036  |
| C            | -3.665102     | -2.020650 | -0.163933 | C            | 3.665105      | -2.020646 | -0.163934 |
| C            | -2.758773     | -2.752859 | -0.926953 | C            | 2.758777      | -2.752855 | -0.926954 |
| C            | -1.398303     | -2.439842 | -0.895026 | C            | 1.398306      | -2.439840 | -0.895026 |
| C            | -0.925262     | -1.393234 | -0.090836 | C            | 0.925265      | -1.393233 | -0.090836 |
| C            | 0.979397      | 0.182645  | -0.495343 | C            | -0.979397     | 0.182643  | -0.495343 |
| N            | 0.456107      | -1.089670 | 0.049547  | N            | -0.456105     | -1.089671 | 0.049549  |
| C            | 2.356537      | 0.450258  | 0.151412  | C            | -2.356537     | 0.450254  | 0.151411  |
| C            | 1.388579      | -2.183993 | -0.220530 | C            | -1.388575     | -2.183996 | -0.220527 |
| C            | 2.742342      | -1.897983 | 0.421921  | C            | -2.742339     | -1.897987 | 0.421923  |
| N            | 3.285832      | -0.646845 | -0.092013 | N            | -3.285831     | -0.646850 | -0.092013 |
| C            | 4.611299      | -0.364135 | 0.436820  | C            | -4.611299     | -0.364140 | 0.436818  |
| H            | -1.715217     | 4.861653  | -0.002261 | H            | 1.715208      | 4.861656  | -0.002261 |
| H            | -0.011400     | 4.521232  | -1.796915 | H            | 0.011390      | 4.521232  | -1.796915 |
| H            | 1.132370      | 2.342252  | -1.995710 | H            | -1.132374     | 2.342250  | -1.995710 |
| H            | -2.266860     | 2.991200  | 1.523320  | H            | 2.266854      | 2.991205  | 1.523319  |
| H            | -2.072350     | 0.813412  | 2.243400  | H            | 2.072354      | 0.813416  | 2.243397  |
| H            | -0.458287     | 0.092624  | 2.131004  | H            | 0.458291      | 0.092626  | 2.131007  |
| H            | -3.897996     | -0.404068 | 1.243060  | H            | 3.897998      | -0.404063 | 1.243058  |
| H            | -4.723860     | -2.260566 | -0.185935 | H            | 4.723863      | -2.260561 | -0.185936 |
| H            | -3.105581     | -3.567527 | -1.556405 | H            | 3.105585      | -3.567524 | -1.556406 |
| H            | -0.706247     | -3.011638 | -1.503830 | H            | 0.706251      | -3.011637 | -1.503830 |
| H            | 1.161192      | 0.052260  | -1.577861 | H            | -1.161190     | 0.052257  | -1.577861 |
| H            | 2.201198      | 0.636850  | 1.232716  | H            | -2.201199     | 0.636848  | 1.232715  |
| H            | 2.776161      | 1.363834  | -0.281510 | H            | -2.776163     | 1.363829  | -0.281512 |
| H            | 1.541061      | -2.342112 | -1.303254 | H            | -1.541057     | -2.342115 | -1.303251 |
| H            | 0.972872      | -3.103003 | 0.201091  | H            | -0.972867     | -3.103005 | 0.201094  |
| H            | 3.436662      | -2.711385 | 0.179846  | H            | -3.436658     | -2.711390 | 0.179849  |
| H            | 2.621469      | -1.875934 | 1.523141  | H            | -2.621467     | -1.875935 | 1.523144  |
| H            | 4.626745      | -0.235062 | 1.536170  | H            | -4.626745     | -0.235059 | 1.536166  |
| H            | 5.002632      | 0.552675  | -0.015841 | H            | -5.002635     | 0.552665  | -0.015851 |
| H            | 5.291307      | -1.184159 | 0.183727  | H            | -5.291304     | -1.184169 | 0.183731  |

| <b>β-CD VACUUM</b> |                |           |           |                 |                |           |           |
|--------------------|----------------|-----------|-----------|-----------------|----------------|-----------|-----------|
| <b>β-CD-CCCW</b>   |                |           |           | <b>β-CD-EXP</b> |                |           |           |
| E                  | -4275.41135478 |           |           | E               | -4275.37504403 |           |           |
| ZPE                | -4274.187102   |           |           | ZPE             | -4274.156320   |           |           |
| H                  | -4274.114324   |           |           | H               | -4274.080253   |           |           |
| G                  | -4274.289467   |           |           | G               | -4274.267579   |           |           |
| S                  | 368.620        |           |           | S               | 394.261        |           |           |
| Atom               | x [Å]          | y [Å]     | z [Å]     | Atom            | x [Å]          | y [Å]     | z [Å]     |
| O                  | 5.781491       | -0.331031 | 1.206985  | C               | 0.201560       | -6.133398 | -0.115502 |
| C                  | 4.661956       | -1.226117 | 1.007110  | C               | -0.667052      | -6.307538 | -1.364310 |
| C                  | 5.105999       | -2.269072 | -0.030492 | O               | 0.159027       | -6.279720 | -2.523405 |
| C                  | 5.489238       | -1.570881 | -1.337731 | C               | -1.738602      | -5.225933 | -1.431845 |
| C                  | 6.540211       | -0.496929 | -1.083744 | O               | -2.547549      | -5.528240 | -2.551365 |
| C                  | 6.105130       | 0.429367  | 0.059326  | C               | -2.539562      | -5.154814 | -0.127112 |
| H                  | 3.815083       | -0.664061 | 0.598423  | O               | -3.330676      | -3.967190 | -0.217865 |
| H                  | 5.971634       | -2.824844 | 0.356694  | C               | -1.588499      | -5.075356 | 1.079211  |
| H                  | 4.582683       | -1.082522 | -1.728335 | O               | -0.638474      | -6.154705 | 1.027870  |
| H                  | 7.466965       | -0.996963 | -0.765355 | C               | -2.271728      | -5.180618 | 2.428993  |
| H                  | 6.935204       | 1.078729  | 0.359291  | O               | -1.284602      | -4.880768 | 3.413734  |
| C                  | 4.239970       | -1.763289 | 2.387007  | C               | -4.716378      | -4.014766 | 0.043917  |
| O                  | 4.058107       | -3.172916 | -0.377458 | C               | -5.475957      | -3.481800 | -1.178745 |
| O                  | 6.028332       | -2.470638 | -2.289057 | O               | -5.111508      | -4.232888 | -2.334624 |
| O                  | 6.782264       | 0.289858  | -2.245088 | C               | -5.199811      | -1.997614 | -1.383924 |
| O                  | 5.011454       | 1.194130  | -0.377152 | O               | -6.021799      | -1.578787 | -2.457584 |
| H                  | 4.250853       | -2.854579 | 2.397886  | C               | -5.479419      | -1.240302 | -0.089328 |
| O                  | 2.915498       | -1.381418 | 2.739408  | O               | -5.092944      | 0.121912  | -0.299006 |
| H                  | 4.967996       | -1.402910 | 3.125817  | C               | -4.687739      | -1.849246 | 1.072681  |
| H                  | 5.404684       | -3.213919 | -2.389126 | O               | -5.044578      | -3.247355 | 1.183580  |
| H                  | 6.882337       | -0.337811 | -2.976316 | C               | -4.958102      | -1.166861 | 2.424428  |
| H                  | 2.865262       | -0.400923 | 2.790984  | O               | -6.272073      | -0.664225 | 2.584509  |
| O                  | 3.863446       | 4.313829  | 1.205920  | C               | -6.072682      | 1.121164  | -0.172632 |
| C                  | 3.865508       | 2.880419  | 1.006534  | C               | -5.976341      | 2.072599  | -1.365068 |
| C                  | 4.957844       | 2.577086  | -0.030909 | O               | -6.156361      | 1.328459  | -2.567250 |
| C                  | 4.650528       | 3.311260  | -1.338481 | C               | -4.639820      | 2.802164  | -1.364705 |
| C                  | 4.465991       | 4.802646  | -1.085153 | O               | -4.674454      | 3.710325  | -2.448699 |
| C                  | 3.470675       | 5.040506  | 0.057993  | C               | -4.418445      | 3.491770  | -0.020524 |
| H                  | 2.898176       | 2.568379  | 0.597806  | O               | -3.064205      | 3.949303  | -0.021255 |
| H                  | 5.932053       | 2.907866  | 0.355907  | C               | -4.629982      | 2.518436  | 1.154160  |
| H                  | 3.703457       | 2.906668  | -1.728694 | O               | -5.907859      | 1.849679  | 1.037134  |
| H                  | 5.434761       | 5.215717  | -0.767133 | C               | -4.584291      | 3.208272  | 2.507869  |
| H                  | 3.480609       | 6.094481  | 0.357519  | O               | -5.468600      | 4.322570  | 2.495484  |
| C                  | 4.022253       | 2.215973  | 2.386658  | C               | -2.779456      | 5.265512  | 0.414659  |
| O                  | 5.689949       | 3.171380  | -2.289897 | C               | -2.169922      | 6.057550  | -0.749762 |
| O                  | 4.001494       | 5.481881  | -2.246717 | O               | -3.052363      | 6.022872  | -1.870726 |
| O                  | 2.190780       | 4.662141  | -0.378159 | C               | -0.803712      | 5.498672  | -1.123878 |
| H                  | 4.882249       | 1.544097  | 2.397788  | O               | -0.282162      | 6.347322  | -2.132999 |
| O                  | 2.897894       | 1.418556  | 2.739145  | C               | 0.085833       | 5.426018  | 0.114405  |
| H                  | 4.194289       | 3.010066  | 3.125267  | O               | 1.312614       | 4.793892  | -0.270577 |
| H                  | 5.882584       | 2.220350  | -2.389226 | C               | -0.605789      | 4.623574  | 1.221878  |
| H                  | 4.554388       | 5.168366  | -2.977947 | O               | -1.881909      | 5.247494  | 1.502832  |
| H                  | 2.100056       | 1.990674  | 2.790919  | C               | 0.191685       | 4.556321  | 2.532992  |
| O                  | -0.963685      | 5.710257  | 1.205380  | O               | 0.925865       | 5.732562  | 2.821472  |
| C                  | 1.058202       | 4.818000  | 1.006125  | C               | 2.473805       | 5.581882  | -0.286613 |
| C                  | 1.076162       | 5.482524  | -0.031800 | C               | 3.265092       | 5.304108  | -1.567229 |
| C                  | 0.310216       | 5.699587  | -1.339250 | O               | 2.446248       | 5.570425  | -2.700990 |
| C                  | -0.970774      | 6.485312  | -1.085929 | C               | 3.772715       | 3.866791  | -1.587674 |
| C                  | -1.777016      | 5.855868  | 0.057642  | O               | 4.566591       | 3.739855  | -2.750317 |
| H                  | -0.201119      | 3.867003  | 0.597902  | C               | 4.540549       | 3.531457  | -0.302915 |
| H                  | 1.425029       | 6.450533  | 0.354694  | O               | 4.752884       | 2.117653  | -0.315842 |
| H                  | 0.035866       | 4.706736  | -1.728997 | C               | 3.708292       | 3.928790  | 0.927871  |
| H                  | -0.689634      | 7.500393  | -0.768362 | O               | 3.305255       | 5.304890  | 0.827257  |
| H                  | -2.594718      | 6.520941  | 0.357196  | C               | 4.431812       | 3.802780  | 2.254078  |
| C                  | 0.775740       | 4.526962  | 2.386252  | O               | 3.449290       | 3.988693  | 3.273571  |
| O                  | 1.067437       | 6.424600  | -2.291154 | C               | 6.057982       | 1.596697  | -0.177985 |
| O                  | -1.791652      | 6.545235  | -2.247364 | C               | 6.371248       | 0.693198  | -1.375275 |
| O                  | -2.279450      | 4.619206  | -0.377918 | O               | 6.244066       | 1.436086  | -2.586607 |
| H                  | 1.837279       | 4.780257  | 2.396973  | C               | 5.455848       | -0.524263 | -1.389239 |
| O                  | 0.698014       | 3.150969  | 2.739631  | O               | 5.873189       | -1.327931 | -2.476890 |
| H                  | 0.262451       | 5.157109  | 3.124616  | C               | 5.533012       | -1.248777 | -0.049532 |
| H                  | 1.931015       | 5.982128  | -2.390560 | O               | 4.509113       | -2.247384 | -0.064173 |
| H                  | -1.201959      | 6.781832  | -2.978774 | C               | 5.301408       | -0.274996 | 1.119783  |
| H                  | -0.246740      | 2.883917  | 2.791268  | O               | 6.188711       | 0.858144  | 1.016990  |
| O                  | -5.065211      | 2.806775  | 1.206797  | C               | 5.526804       | -0.924312 | 2.475828  |
| C                  | -3.668242      | 3.127714  | 1.006927  | O               | 6.793008       | -1.575483 | 2.483517  |
| C                  | -3.615777      | 4.259653  | -0.031051 | C               | 4.827706       | -3.559523 | 0.356217  |

|   |           |           |           |   |           |           |           |
|---|-----------|-----------|-----------|---|-----------|-----------|-----------|
| C | -4.263757 | 3.796348  | -1.338207 | C | 4.582620  | -4.532178 | -0.805295 |
| C | -5.676692 | 3.285057  | -1.084137 | O | 5.325124  | -4.112397 | -1.949095 |
| C | -5.686744 | 2.261987  | 0.059214  | C | 3.097394  | -4.625835 | -1.129734 |
| H | -3.148804 | 2.253886  | 0.598558  | O | 2.965741  | -5.616314 | -2.135144 |
| H | -4.154700 | 5.136133  | 0.355558  | C | 2.310651  | -4.953237 | 0.136403  |
| H | -3.658931 | 2.962772  | -1.728367 | O | 0.918701  | -4.931394 | -0.206356 |
| H | -6.294591 | 4.137843  | -0.765966 | C | 2.617881  | -3.929199 | 1.234775  |
| H | -6.716398 | 2.037273  | 0.359224  | O | 4.046238  | -3.936897 | 1.469397  |
| C | -3.055276 | 3.429073  | 2.386872  | C | 1.914600  | -4.217409 | 2.570246  |
| O | -4.358795 | 4.840565  | -2.289931 | O | 1.754365  | -5.596744 | 2.852171  |
| O | -6.236251 | 2.681017  | -2.245326 | H | 0.879066  | -6.984081 | 0.004914  |
| O | -5.033303 | 1.098271  | -0.377016 | H | -1.165834 | -7.284329 | -1.282936 |
| H | -2.591743 | 4.417089  | 2.397657  | H | -0.441137 | -6.171853 | -3.276806 |
| O | -2.027543 | 2.510607  | 2.739698  | H | -1.235991 | -4.254092 | -1.555655 |
| H | -3.867710 | 3.420283  | 3.125517  | H | -3.328960 | -4.940348 | -2.543213 |
| H | -3.474351 | 5.239541  | -2.389938 | H | -3.184753 | -6.041123 | -0.049083 |
| H | -6.053775 | 3.289634  | -2.976742 | H | -1.058416 | -4.116377 | 1.031116  |
| H | -2.407477 | 1.605327  | 2.791103  | H | -2.663473 | -6.201206 | 2.551233  |
| O | -5.352606 | -2.210290 | 1.206675  | H | -3.111292 | -4.474211 | 2.467896  |
| C | -4.732336 | -0.918052 | 1.007019  | H | -1.637972 | -5.099575 | 4.284495  |
| C | -5.585041 | -0.170884 | -0.030355 | H | -5.029462 | -5.039543 | 0.272568  |
| C | -5.627214 | -0.965900 | -1.337809 | H | -6.549908 | -3.606951 | -0.979701 |
| C | -6.107960 | -2.389636 | -1.084174 | H | -5.468894 | -3.734733 | -3.086575 |
| C | -5.314142 | -3.035597 | 0.058866  | H | -4.134216 | -1.870445 | -1.630307 |
| H | -3.725522 | -1.056964 | 0.598186  | H | -5.912467 | -0.615491 | -2.580475 |
| H | -6.606137 | -0.046051 | 0.356825  | H | -6.546032 | -1.297422 | 0.154399  |
| H | -4.598522 | -1.012399 | -1.728373 | H | -3.613396 | -1.782768 | 0.858537  |
| H | -7.159950 | -2.341461 | -0.765944 | H | -4.211720 | -0.373202 | 2.560076  |
| H | -5.780285 | -3.980871 | 0.358616  | H | -4.786908 | -1.914050 | 3.206812  |
| C | -4.584893 | -0.251280 | 2.387061  | H | -6.269965 | 0.253717  | 2.265396  |
| O | -6.503307 | -0.389006 | -2.289029 | H | -7.072724 | 0.680224  | -0.112447 |
| O | -5.984393 | -3.203230 | -2.245708 | H | -6.778615 | 2.816839  | -1.261765 |
| O | -3.996907 | -3.250019 | -0.377487 | H | -5.876531 | 1.916614  | -3.285327 |
| H | -5.068612 | 0.726999  | 2.398511  | H | -3.838488 | 2.058856  | -1.498463 |
| O | -3.225800 | -0.020190 | 2.738839  | H | -3.985338 | 4.391033  | -2.312744 |
| H | -5.083795 | -0.892318 | 3.125907  | H | -5.111972 | 4.333409  | 0.075960  |
| H | -6.264143 | 0.551368  | -2.388671 | H | -3.829950 | 1.767651  | 1.125256  |
| H | -6.346793 | -2.680996 | -2.976881 | H | -3.548050 | 3.523725  | 2.687323  |
| H | -2.754965 | -0.881693 | 2.790325  | H | -4.866870 | 2.477154  | 3.280324  |
| O | -1.609227 | -5.562962 | 1.205462  | H | -5.354283 | 4.802247  | 3.325072  |
| C | -2.232838 | -4.272288 | 1.006165  | H | -3.689277 | 5.745872  | 0.787151  |
| C | -3.348573 | -4.472801 | -0.031356 | H | -2.039716 | 7.096344  | -0.414025 |
| C | -2.753092 | -5.000833 | -1.338940 | H | -2.530159 | 6.371157  | -2.611045 |
| C | -1.939736 | -6.264485 | -1.085742 | H | -0.938990 | 4.475349  | -1.505829 |
| C | -0.939936 | -6.047139 | 0.057556  | H | 0.568063  | 5.978886  | -2.441209 |
| H | -1.496519 | -3.571570 | 0.597532  | H | 0.285936  | 6.430598  | 0.501363  |
| H | -4.082777 | -5.193528 | 0.355455  | H | -0.790948 | 3.598621  | 0.874488  |
| H | -2.075302 | -4.225353 | -1.729004 | H | 0.854911  | 3.685816  | 2.495250  |
| H | -2.633370 | -7.057048 | -0.767942 | H | -0.534586 | 4.381871  | 3.337732  |
| H | -0.491714 | -7.001124 | 0.357044  | H | 1.862636  | 5.518557  | 2.685907  |
| C | -2.662460 | -3.741683 | 2.386262  | H | 2.225182  | 6.644607  | -0.209592 |
| O | -3.750186 | -5.325690 | -2.290486 | H | 4.134497  | 5.977720  | -1.566899 |
| O | -1.226404 | -6.674668 | -2.247314 | H | 2.899071  | 5.167963  | -3.457678 |
| O | 0.049199  | -5.150957 | -0.378347 | H | 2.900302  | 3.196152  | -1.626544 |
| H | -3.728810 | -3.509449 | 2.397359  | H | 4.997701  | 2.861499  | -2.745519 |
| O | -1.995363 | -2.535480 | 2.738875  | H | 5.501644  | 4.064588  | -0.304667 |
| H | -2.473026 | -4.531831 | 3.124850  | H | 2.820280  | 3.285453  | 0.956252  |
| H | -4.336337 | -4.552393 | -2.389863 | H | 5.215155  | 4.572545  | 2.308121  |
| H | -1.860538 | -6.632084 | -2.978572 | H | 4.904140  | 2.814247  | 2.321830  |
| H | -1.028328 | -2.704922 | 2.790659  | H | 3.896757  | 4.107759  | 4.120056  |
| O | 3.345604  | -4.726455 | 1.206052  | H | 6.789457  | 2.409440  | -0.107701 |
| C | 1.947686  | -4.409569 | 1.006455  | H | 7.407851  | 0.345888  | -1.262744 |
| C | 1.409255  | -5.406613 | -0.031579 | H | 6.256935  | 0.774809  | -3.296320 |
| C | 2.193942  | -5.270060 | -1.338826 | H | 4.419309  | -0.179761 | -1.529865 |
| C | 3.688893  | -5.422189 | -1.085016 | H | 5.517947  | -2.231170 | -2.356580 |
| C | 4.141858  | -4.504999 | 0.058466  | H | 6.519554  | -1.711364 | 0.057618  |
| H | 1.858623  | -3.396884 | 0.598189  | H | 4.262094  | 0.076958  | 1.080680  |
| H | 1.514729  | -6.430146 | 0.354922  | H | 4.712539  | -1.640962 | 2.642429  |
| H | 2.010513  | -4.256572 | -1.728824 | H | 5.471939  | -0.142473 | 3.247616  |
| H | 3.875905  | -6.458653 | -0.767135 | H | 6.841892  | -2.116906 | 3.280806  |
| H | 5.167070  | -4.749353 | 0.358338  | H | 5.866727  | -3.605911 | 0.695879  |
| C | 1.264914  | -4.415258 | 2.386551  | H | 4.928021  | -5.525664 | -0.485037 |
| O | 1.826500  | -6.252013 | -2.290622 | H | 4.983399  | -4.648009 | -2.682514 |
| O | 4.454829  | -5.120290 | -2.246279 | H | 2.758259  | -3.645595 | -1.498766 |
| H | 0.418403  | -5.104061 | 2.397306  | H | 2.022221  | -5.697109 | -2.372896 |
| O | 0.737928  | -3.141786 | 2.739868  | H | 2.588613  | -5.943824 | 0.511107  |

|   |          |           |           |   |          |           |          |
|---|----------|-----------|-----------|---|----------|-----------|----------|
| H | 2.000755 | -4.760264 | 3.124951  | H | 2.327918 | -2.925872 | 0.895823 |
| H | 0.856509 | -6.227932 | -2.390408 | H | 0.945883 | -3.707472 | 2.577594 |
| H | 4.026310 | -5.589353 | -2.977737 | H | 2.531003 | -3.765237 | 3.357744 |
| H | 1.473199 | -2.491212 | 2.791554  | H | 0.817824 | -5.803440 | 2.704722 |

| Complexes 1:1 VACUUM |           |           |           |                     |          |           |           |                    |           |           |           |
|----------------------|-----------|-----------|-----------|---------------------|----------|-----------|-----------|--------------------|-----------|-----------|-----------|
| [MIA S]-[β-CD-CCCW]  |           |           |           | [MIA R]-[β-CD-CCCW] |          |           |           | [MIA S]-[β-CD-EXP] |           |           |           |
| CR1                  |           |           |           | CR1                 |          |           |           | CR1                |           |           |           |
| E -5082.91346527     |           |           |           | E -5082.90887702    |          |           |           | E -5082.87566041   |           |           |           |
| Atom                 | x [Å]     | y [Å]     | z [Å]     | Atom                | x [Å]    | y [Å]     | z [Å]     | Atom               | x [Å]     | y [Å]     | z [Å]     |
| O                    | -5.615961 | -4.123619 | -0.362940 | O                   | 3.681184 | 4.432078  | -2.060141 | C                  | 6.566693  | -1.425433 | 0.055989  |
| C                    | -4.216110 | -4.024781 | -0.717851 | C                   | 2.303785 | 4.008168  | -1.935789 | C                  | 6.843424  | -0.686803 | 1.367506  |
| C                    | -3.476810 | -5.113134 | 0.076140  | C                   | 1.598547 | 5.019005  | -1.023007 | O                  | 6.585846  | -1.555354 | 2.465989  |
| C                    | -3.679356 | -4.890185 | 1.576914  | C                   | 2.288113 | 5.084106  | 0.340724  | C                  | 5.991134  | 0.572315  | 1.462075  |
| C                    | -5.163996 | -4.812914 | 1.911362  | C                   | 3.778351 | 5.361166  | 0.170723  | O                  | 6.380771  | 1.232049  | 2.650544  |
| C                    | -5.875583 | -3.812013 | 0.991662  | C                   | 4.393403 | 4.383386  | -0.837926 | C                  | 6.152723  | 1.451330  | 0.216825  |
| H                    | -3.831520 | -3.045877 | -0.411422 | H                   | 2.270160 | 3.019613  | -1.465767 | O                  | 5.127751  | 2.446012  | 0.298246  |
| H                    | -3.868784 | -6.100951 | -0.204580 | H                   | 1.636949 | 6.011168  | -1.494168 | C                  | 5.970564  | 0.613928  | -1.062002 |
| H                    | -3.216307 | -3.924015 | 1.831710  | H                   | 2.175090 | 4.098971  | 0.819451  | O                  | 6.830993  | -0.540910 | -1.024055 |
| H                    | -5.606998 | -5.802375 | 1.724275  | H                   | 3.892543 | 6.374770  | -0.241038 | C                  | 6.305403  | 1.352785  | -2.343284 |
| H                    | -6.961987 | -3.891441 | 1.110758  | H                   | 5.420033 | 4.678957  | -1.081739 | O                  | 5.854522  | 0.539609  | -3.423173 |
| C                    | -4.115363 | -4.103972 | -2.252251 | C                   | 1.721641 | 3.874741  | -3.355062 | C                  | 5.451875  | 3.816102  | 0.218516  |
| O                    | -2.065754 | -5.069290 | -0.125429 | O                   | 0.243340 | 4.645704  | -0.778670 | C                  | 4.909397  | 4.532818  | 1.463632  |
| O                    | -3.126235 | -5.936244 | 2.354664  | O                   | 1.752576 | 6.111675  | 1.158024  | O                  | 5.446529  | 3.934504  | 2.640620  |
| O                    | -5.380783 | -4.427595 | 3.264695  | O                   | 4.484810 | 5.248812  | 1.401564  | C                  | 3.386566  | 4.494116  | 1.479446  |
| O                    | -5.435616 | -2.518422 | 1.315917  | O                   | 4.365878 | 3.099183  | -0.272608 | O                  | 2.970465  | 5.252926  | 2.601677  |
| H                    | -3.446112 | -4.911184 | -2.555023 | H                   | 0.889219 | 4.567219  | -3.498519 | C                  | 2.851287  | 5.045510  | 0.162007  |
| O                    | -3.581479 | -2.916823 | -2.826491 | O                   | 1.201776 | 2.575528  | -3.608373 | O                  | 1.426525  | 4.894328  | 0.172829  |
| H                    | -5.117854 | -4.320203 | -2.644882 | H                   | 2.513531 | 4.134450  | -4.070146 | C                  | 3.461328  | 4.300209  | -1.029740 |
| H                    | -2.197419 | -6.056921 | -2.601631 | H                   | 0.773022 | 6.043140  | 1.143895  | O                  | 4.901577  | 4.401768  | -0.943970 |
| H                    | -4.776778 | -4.968469 | 3.795182  | H                   | 3.978510 | 5.760245  | 2.049582  | C                  | 3.013052  | 4.857818  | -2.390708 |
| H                    | -4.176441 | -2.162421 | -2.619040 | H                   | 1.930352 | 1.921843  | -3.528598 | O                  | 2.813347  | 6.258413  | -2.422387 |
| O                    | -7.179410 | 0.592874  | 0.402387  | O                   | 6.296426 | 0.199440  | -1.453735 | C                  | 0.646684  | 6.064954  | 0.133478  |
| C                    | -6.219061 | -0.469944 | 0.194859  | C                   | 5.124213 | 1.045626  | -1.391671 | C                  | -0.491533 | 5.958075  | 1.149345  |
| C                    | -6.388574 | -1.458073 | 1.359524  | C                   | 5.476657 | 2.227657  | -0.476798 | O                  | 0.067522  | 5.696649  | 2.436800  |
| C                    | -6.137630 | -0.742652 | 2.689346  | C                   | 5.841606 | 1.704362  | 0.915298  | C                  | -1.495419 | 4.883488  | 0.756176  |
| C                    | -7.030517 | 0.485719  | 2.814233  | C                   | 6.948957 | 0.659487  | 0.829015  | O                  | -2.558914 | 4.962444  | 1.690175  |
| C                    | -6.923856 | 1.363262  | 1.560242  | C                   | 6.600699 | -0.411793 | -0.213910 | C                  | -1.962019 | 5.088033  | -0.683072 |
| H                    | -5.205257 | -0.056498 | 0.231655  | H                   | 4.301231 | 0.490488  | -0.929561 | O                  | -2.696175 | 3.912658  | -1.025790 |
| H                    | -7.409228 | -1.865903 | 1.348466  | H                   | 6.324304 | 2.785099  | -0.899436 | C                  | -0.765092 | 5.246572  | -1.637662 |
| H                    | -5.088094 | -0.408999 | 2.690487  | H                   | 4.942668 | 1.221112  | 1.328226  | O                  | 0.120131  | 6.290803  | -1.165768 |
| H                    | -8.073287 | 0.142773  | 2.886659  | H                   | 7.867159 | 1.161604  | 0.489523  | C                  | -1.175835 | 5.589565  | -3.060033 |
| H                    | -7.694924 | 2.141719  | 1.573926  | H                   | 7.464138 | -1.059454 | -0.403636 | O                  | -2.060205 | 6.703964  | -3.036347 |
| C                    | -6.440767 | -1.031032 | -1.221760 | C                   | 4.696656 | 1.380690  | -2.831046 | C                  | -3.912900 | 4.039065  | -1.736935 |
| O                    | -6.404986 | -1.573021 | 3.804780  | O                   | 6.298543 | 2.735257  | 1.773109  | C                  | -5.063756 | 3.515259  | -0.865702 |
| O                    | -6.692767 | 1.269827  | 3.953514  | O                   | 7.171058 | 0.022819  | 2.082314  | O                  | -5.051350 | 4.183644  | 0.396071  |
| O                    | -5.642437 | 1.936633  | 1.524948  | O                   | 5.515085 | -1.157909 | 0.269208  | C                  | -4.966935 | 2.008360  | -0.669052 |
| H                    | -6.619017 | -2.107278 | -1.188425 | H                   | 4.654766 | 2.460893  | -2.980711 | O                  | -6.162091 | 1.614040  | -0.016589 |
| O                    | -5.309698 | -0.847882 | -2.064926 | O                   | 3.394374 | 0.885128  | -3.130438 | C                  | -4.771405 | 1.294811  | -2.002890 |
| H                    | -7.332376 | -0.545694 | -1.640499 | H                   | 5.446729 | 0.965283  | -3.516213 | O                  | -4.515119 | -0.082723 | -1.698903 |
| H                    | -5.909585 | -2.405173 | 3.687479  | H                   | 5.620024 | 3.435166  | 1.785985  | C                  | -3.595641 | 1.898105  | -2.775829 |
| H                    | -6.600655 | 0.645406  | 4.688599  | H                   | 7.210083 | 0.734681  | 2.738425  | O                  | -3.853854 | 3.313702  | -2.946939 |
| H                    | -5.132151 | 0.113938  | -2.163438 | H                   | 3.428354 | -0.098554 | -3.145627 | C                  | -3.376963 | 1.270922  | -4.166047 |

|   |           |          |           |   |           |           |           |   |           |           |           |
|---|-----------|----------|-----------|---|-----------|-----------|-----------|---|-----------|-----------|-----------|
| O | -4.711691 | 4.882456 | -0.477705 | O | 4.448760  | -4.442748 | -1.014087 | O | -4.551228 | 0.748939  | -4.766354 |
| C | -4.858610 | 3.461576 | -0.244770 | C | 4.481337  | -2.996881 | -1.006046 | C | -5.405722 | -1.056408 | -2.165566 |
| C | -5.510892 | 3.303139 | 1.137618  | C | 5.486873  | -2.570985 | 0.076835  | C | -5.755144 | -2.013821 | -1.024956 |
| C | -4.623064 | 3.944199 | 2.207274  | C | 5.056608  | -3.131398 | 1.435237  | O | -1.293255 | 0.041947  |           |
| C | -4.320397 | 5.395218 | 1.853562  | C | 4.833753  | -4.636117 | 1.364787  | C | -4.501080 | -2.734423 | -0.544341 |
| C | -3.807417 | 5.507322 | 0.411977  | C | 3.937684  | -5.007804 | 0.175352  | O | -4.914680 | -3.630715 | 0.471264  |
| H | -3.868863 | 2.992559 | -0.221133 | H | 3.493797  | -2.610272 | -0.732338 | C | -3.788151 | -3.434680 | -1.709237 |
| H | -6.495334 | 3.792034 | 1.135784  | H | 6.490024  | -2.941351 | -0.177750 | O | -2.497186 | -3.861662 | -1.263026 |
| H | -3.673341 | 3.386788 | 2.224123  | H | 4.101817  | -2.649717 | 1.695722  | C | -3.588740 | -2.456666 | -2.881676 |
| H | -5.261221 | 5.962457 | 1.911482  | H | 5.809555  | -5.115423 | 1.195719  | O | -4.831701 | -1.813146 | -3.223536 |
| H | -3.767455 | 6.557977 | 0.103401  | H | 3.954391  | -6.091784 | 0.017727  | C | -3.092133 | -3.114030 | -4.154699 |
| C | -5.624987 | 2.867836 | -1.441051 | C | 4.770986  | -2.530077 | -2.443211 | O | -2.672370 | -2.070604 | -5.029941 |
| O | -5.233635 | 3.940926 | 3.484888  | O | 6.026065  | -2.893393 | 2.440399  | C | -2.288003 | -5.233345 | -0.982164 |
| O | -3.352366 | 5.961524 | 2.730397  | O | 4.241275  | -5.136853 | 2.558146  | C | -1.702785 | -5.387692 | 0.436490  |
| O | -2.532118 | 4.923336 | 0.345003  | O | 2.624094  | -4.573043 | 0.432501  | O | -2.598309 | -4.762505 | 1.341049  |
| H | -6.519231 | 2.339939 | -1.105008 | H | 5.583089  | -1.801669 | -2.454526 | C | -0.282831 | -4.823299 | 0.497565  |
| O | -4.855348 | 1.913681 | -2.162898 | O | 3.656638  | -1.881326 | -3.045110 | O | 0.278992  | -5.146129 | 1.758869  |
| H | -5.936757 | 3.699053 | -2.087315 | H | 5.082831  | -3.406179 | -3.027196 | C | 0.572724  | -5.378585 | -0.641251 |
| H | -5.520599 | 3.029322 | 3.680384  | H | 6.228315  | -1.939604 | 2.437348  | O | 1.789234  | -4.623400 | -0.612036 |
| H | -3.629654 | 5.718411 | 3.626320  | H | 4.747161  | -4.752390 | 3.289512  | C | -0.126895 | -5.220063 | -1.998247 |
| H | -4.057254 | 2.353804 | -2.531436 | H | 2.892548  | -2.501075 | -3.082694 | O | -1.434313 | -5.817089 | -1.941359 |
| O | -0.093177 | 5.518129 | -2.347974 | O | -0.309515 | -5.986881 | -1.297538 | C | 0.638035  | -5.860349 | -3.145395 |
| C | -1.175080 | 4.800153 | -1.709236 | C | 0.745309  | -5.011330 | -1.125008 | O | 0.985650  | -7.197177 | -2.796145 |
| C | -1.520727 | 5.570533 | -0.425414 | C | 1.543418  | -5.452150 | 0.112837  | C | 3.017059  | -5.295564 | -0.833178 |
| C | -0.293209 | 5.634471 | 0.486446  | C | 0.624497  | -5.449069 | 1.336915  | C | 3.837899  | -5.300020 | 0.463024  |
| C | 0.897657  | 6.224254 | -0.250938 | C | -0.591285 | -6.334623 | 1.081005  | O | 3.061534  | -5.875370 | 1.514534  |
| C | 1.108147  | 5.509419 | -1.600959 | C | -1.263964 | -5.979999 | -0.252062 | C | 4.279899  | -3.891865 | 0.837486  |
| H | -0.833905 | 3.795892 | -1.434817 | H | 0.303874  | -4.027136 | -0.932025 | O | 5.123794  | -4.023413 | 1.968302  |
| H | -1.838628 | 6.590067 | -0.685465 | H | 1.929135  | -6.467990 | -0.052062 | C | 4.968117  | -3.221723 | -0.347473 |
| H | -0.043796 | 4.601506 | 0.775999  | H | 0.276810  | -4.415852 | 1.493565  | O | 5.237090  | -1.867604 | 0.040767  |
| H | 0.670687  | 7.277452 | -0.482216 | H | -0.236141 | -7.372855 | 0.998908  | C | 4.064234  | -3.267870 | -1.585194 |
| H | 1.838340  | 6.052963 | -2.211111 | H | -1.996041 | -6.749797 | -0.520671 | O | 3.747359  | -4.655048 | -1.855819 |
| C | -2.305791 | 4.640151 | -2.742270 | C | 1.516796  | -4.924172 | -2.455127 | C | 4.703039  | -2.663588 | -2.848705 |
| O | -0.513982 | 6.440204 | 1.629836  | O | 1.267837  | -5.948425 | 2.496196  | O | 6.117266  | -2.764453 | -2.892820 |
| O | 2.095868  | 6.132166 | 0.502902  | O | -1.554028 | -6.228611 | 2.123302  | H | 7.260168  | -2.261500 | -0.074901 |
| O | 1.552356  | 4.201954 | -1.347008 | O | -1.885632 | -4.729119 | -0.127452 | H | 7.903003  | -0.392450 | 1.363616  |
| H | -3.240940 | 5.052463 | -2.359283 | H | 2.569134  | -5.177807 | -2.316346 | H | 6.548411  | -0.984380 | 3.248840  |
| O | -2.574718 | 3.277541 | -3.049794 | O | 1.500782  | -3.614051 | -3.008609 | H | 4.934602  | 0.266627  | 1.505255  |
| H | -2.022786 | 5.203119 | -3.641512 | H | 1.074453  | -5.653010 | -3.146897 | H | 5.912057  | 2.088830  | 2.702754  |
| H | -1.332751 | 6.133481 | 2.062300  | H | 2.134782  | -5.509331 | 2.577355  | H | 7.146065  | 1.921463  | 0.230044  |
| H | 1.866299  | 6.426206 | 1.397137  | H | -1.061886 | -6.315903 | 2.952905  | H | 4.924391  | 0.289207  | -1.109721 |
| H | -1.776584 | 2.876315 | -3.461124 | H | 0.572243  | -3.351967 | -3.198800 | H | 7.392946  | 1.512987  | -2.385920 |
| O | 3.193449  | 2.079903 | -3.868135 | O | -4.460407 | -3.389223 | -2.394631 | H | 5.807712  | 2.331790  | -2.335655 |
| C | 2.047973  | 2.584871 | -3.146359 | C | -3.105995 | -3.549488 | -1.910466 | H | 6.210696  | 0.894883  | -4.246510 |
| C | 2.578789  | 3.651134 | -2.175405 | C | -3.162358 | -4.544555 | -0.739727 | H | 6.536027  | 3.952381  | 0.138266  |
| C | 3.590593  | 3.028033 | -1.201642 | C | -4.081787 | -4.004038 | 0.359534  | H | 5.229067  | 5.582986  | 1.404406  |
| C | 4.710817  | 2.323922 | -1.971192 | C | -5.459346 | -3.690944 | -0.214393 | H | 4.912795  | 4.283088  | 3.372037  |
| C | 4.104639  | 1.392912 | -3.037052 | C | -5.324178 | -2.789218 | -1.447790 | H | 3.066625  | 3.445449  | 1.574673  |
| H | 1.598733  | 1.774510 | -2.582257 | H | -2.736984 | -2.589769 | -1.533257 | H | 1.994889  | 5.254205  | 2.633380  |
| H | 3.068864  | 4.452835 | -2.745970 | H | -3.549414 | -5.508202 | -1.099897 | H | 3.116370  | 6.104602  | 0.069403  |

|   |           |           |           |   |           |           |           |   |           |           |           |
|---|-----------|-----------|-----------|---|-----------|-----------|-----------|---|-----------|-----------|-----------|
| H | 3.054575  | 2.269674  | -0.610483 | H | -3.641602 | -3.070829 | 0.739870  | H | 3.186178  | 3.238511  | -0.982358 |
| H | 5.294958  | 3.094853  | -2.497098 | H | -5.919158 | -4.635096 | -0.542545 | H | 2.105853  | 4.319264  | -2.695320 |
| H | 4.893832  | 1.019252  | -3.698684 | H | -6.290027 | -2.677623 | -1.953559 | H | 3.796527  | 4.616486  | -3.116877 |
| C | 1.006018  | 3.032804  | -4.186524 | C | -2.228789 | -3.945510 | -3.111534 | H | 1.894379  | 6.427564  | -2.153594 |
| O | 4.155352  | 4.017487  | -0.356156 | O | -4.265333 | -4.936426 | 1.412662  | H | 1.264030  | 6.942310  | 0.350818  |
| O | 5.548727  | 1.523040  | -1.163232 | O | -6.297799 | -3.045010 | 0.737403  | H | -1.011363 | 6.926615  | 1.157951  |
| O | 3.468027  | 0.330413  | -2.371539 | O | -4.834204 | -1.546406 | -1.023708 | H | -0.683458 | 5.497788  | 3.015529  |
| H | 0.710136  | 4.070106  | -4.022988 | H | -1.722496 | -4.894413 | -2.924730 | H | -1.003252 | 3.902188  | 0.808214  |
| O | -0.193600 | 2.268245  | -4.118219 | O | -1.201012 | -2.995080 | -3.371901 | H | -3.339780 | 4.512220  | 1.309299  |
| H | 1.468490  | 2.956452  | -5.179394 | H | -2.885431 | -4.070040 | -3.982538 | H | -2.597644 | 5.977527  | -0.743592 |
| H | 3.423256  | 4.548151  | 0.010637  | H | -3.384585 | -5.179202 | 1.752730  | H | -0.216802 | 4.296098  | -1.660641 |
| H | 6.028681  | 2.041275  | -0.456968 | H | -6.171336 | -3.524934 | 1.569225  | H | -1.661174 | 4.703706  | -3.490298 |
| H | 0.013801  | 1.322010  | -4.283470 | H | -1.608649 | -2.130785 | -3.600873 | H | -0.266742 | 5.808437  | -3.640453 |
| O | 2.726802  | -2.985174 | -3.757151 | O | -4.916921 | 1.614625  | -2.901982 | H | -2.379684 | 6.848813  | -3.935448 |
| C | 2.408874  | -1.615391 | -3.416636 | C | -4.342993 | 0.347384  | -2.502282 | H | -4.077068 | 5.082496  | -2.022873 |
| C | 3.681052  | -1.005734 | -2.816078 | C | -5.361848 | -0.347483 | -1.586407 | H | -6.004196 | 3.732482  | -1.392506 |
| C | 4.104480  | -1.787424 | -1.569459 | C | -5.679198 | 0.540737  | -0.381711 | H | -5.611830 | 3.643367  | 0.977000  |
| C | 4.233308  | -3.275139 | -1.874165 | C | -6.105480 | 1.933649  | -0.823482 | H | -4.088207 | 1.796566  | -0.041666 |
| C | 2.991968  | -3.788948 | -2.622140 | C | -5.098665 | 2.513742  | -1.826637 | H | -6.107026 | 0.659490  | 0.178708  |
| H | 1.620531  | -1.603982 | -2.656367 | H | -3.428637 | 0.526268  | -1.926363 | H | -5.672851 | 1.384450  | -2.617682 |
| H | 4.488480  | -1.035665 | -3.561394 | H | -6.284222 | -0.560740 | -2.145184 | H | -2.675688 | 1.784693  | -2.188797 |
| H | 3.310043  | -1.657812 | -0.817807 | H | -4.755858 | 0.632263  | 0.209093  | H | -2.609987 | 0.492854  | -4.088200 |
| H | 5.096518  | -3.409085 | -2.543223 | H | -7.073375 | 1.853410  | -1.339854 | H | -2.981803 | 2.062272  | -4.814166 |
| H | 3.175460  | -4.796675 | -3.011420 | H | -5.489776 | 3.436098  | -2.270839 | H | -4.544264 | -0.208385 | -4.604234 |
| C | 1.849921  | -0.919582 | -4.671671 | C | -3.948216 | -0.415307 | -3.778874 | H | -6.306298 | -0.599325 | -2.586555 |
| O | 5.350425  | -1.335082 | -1.071079 | O | -6.726738 | 0.003472  | 0.409972  | H | -6.461617 | -2.757818 | -1.421833 |
| O | 4.402547  | -4.052763 | -0.693112 | O | -6.213490 | 2.822627  | 0.284808  | H | -6.298442 | -1.880039 | 0.811626  |
| O | 1.904674  | -3.792351 | -1.734205 | O | -3.891098 | 2.762324  | -1.152610 | H | -3.808426 | -1.979372 | -0.145476 |
| H | 2.451160  | -0.045378 | -4.929934 | H | -4.350162 | -1.429843 | -3.757720 | H | -4.109034 | -4.039584 | 0.862177  |
| O | 0.523634  | -0.438726 | -4.483717 | O | -2.539354 | -0.556013 | -3.920426 | H | -4.385197 | -4.298643 | -2.034422 |
| H | 1.900495  | -1.632264 | -5.505652 | H | -4.384405 | 0.111738  | -4.638022 | H | -2.858099 | -1.699942 | -2.572139 |
| H | 5.322825  | -0.355546 | -1.027929 | H | -6.477315 | -0.910220 | 0.644836  | H | -3.912600 | -3.702203 | -4.590269 |
| H | 5.015086  | -3.571837 | -0.114972 | H | -6.741238 | 2.354816  | 0.948918  | H | -2.268316 | -3.797059 | -3.909204 |
| H | -0.067747 | -1.202590 | -4.303667 | H | -2.137282 | 0.338801  | -3.984640 | H | -2.605091 | -2.425487 | -5.924421 |
| O | -1.210435 | -5.695687 | -2.199844 | O | -1.335835 | 5.077884  | -2.428752 | H | -3.232470 | -5.782843 | -1.054249 |
| C | -0.377875 | -4.515917 | -2.302280 | C | -1.960331 | 3.779353  | -2.318903 | H | -1.641721 | -6.466448 | 0.643580  |
| C | 1.005930  | -4.898894 | -1.755199 | C | -3.179459 | 3.974310  | -1.407541 | H | -2.229626 | -4.601795 | 2.250485  |
| C | 0.881385  | -5.353706 | -0.298926 | C | -2.718920 | 4.436602  | -0.018396 | H | -0.334013 | -3.732295 | 0.368520  |
| C | -0.140023 | -6.477887 | -0.175683 | C | -1.825819 | 5.672528  | -0.095721 | H | 1.249811  | -5.214712 | 1.660281  |
| C | -1.455804 | -6.095099 | -0.865596 | C | -0.768475 | 5.524501  | -1.215292 | H | 0.772784  | -6.439666 | -0.459949 |
| H | -0.795203 | -3.720931 | -1.674619 | H | -1.267765 | 3.080006  | -1.837114 | H | -0.223892 | -4.148741 | -2.219309 |
| H | 1.424511  | -5.715337 | -2.360504 | H | -3.852921 | 4.722858  | -1.848133 | H | 1.533659  | -5.253224 | -3.334842 |
| H | 0.521149  | -4.492519 | 0.285429  | H | -2.116980 | 3.608619  | 0.388351  | H | -0.000573 | -5.833307 | -4.040114 |
| H | 0.259887  | -7.359012 | -0.699243 | H | -2.466580 | 6.521633  | -0.371321 | H | 1.505396  | -7.567469 | -3.520185 |
| H | -2.116818 | -6.966384 | -0.934602 | H | -0.340771 | 6.507554  | -1.440580 | H | 2.831464  | -6.313599 | -1.187888 |
| C | -0.429441 | -4.029847 | -3.762243 | C | -2.217505 | 3.252350  | -3.743435 | H | 4.735867  | -5.909752 | 0.288919  |
| O | 2.105709  | -5.839819 | 0.218953  | O | -3.820361 | 4.716480  | 0.823587  | H | 3.567132  | -5.703963 | 2.324840  |
| O | -0.410142 | -6.798303 | 1.184960  | O | -1.166258 | 5.985445  | 1.123915  | H | 3.383951  | -3.300666 | 1.083509  |
| H | 0.575285  | -3.965522 | -4.183849 | H | -3.271941 | 3.015004  | -3.890901 | H | 5.462529  | -3.140255 | 2.211339  |
| O | -0.990783 | -2.727868 | -3.884741 | O | -1.508244 | 2.048929  | -4.017073 | H | 5.904335  | -3.736910 | -0.586040 |



|            |                |           |           |            |                |           |           |            |                |           |           |
|------------|----------------|-----------|-----------|------------|----------------|-----------|-----------|------------|----------------|-----------|-----------|
| H          | -1.001443      | -4.765904 | -4.342692 | H          | -1.938718      | 4.045936  | -4.449416 | H          | 3.127645       | -2.735857 | -1.375616 |
| H          | 2.788853       | -5.157943 | 0.072559  | H          | -4.470402      | 3.998121  | 0.706972  | H          | 4.392003       | -1.617723 | -2.939827 |
| H          | 0.453299       | -6.846658 | 1.622162  | H          | -1.346328      | 5.319638  | 1.830553  | H          | 4.288326       | -3.209025 | -3.704920 |
| H          | -1.918295      | -2.746392 | -3.560318 | H          | -0.543139      | 2.212248  | -3.930358 | H          | 6.463930       | -1.894817 | -2.636041 |
| C          | 2.553551       | 0.553085  | 5.207700  | C          | 1.333803       | -1.234829 | 1.285727  | C          | 0.473880       | 1.394504  | 1.048719  |
| C          | 2.302187       | 1.050576  | 3.930352  | C          | 1.147409       | -0.075786 | 0.532199  | C          | 0.183154       | 0.201375  | 0.389692  |
| C          | 3.323853       | 1.052520  | 2.983840  | C          | 0.335136       | 0.939222  | 1.034010  | C          | -0.680080      | -0.717341 | 0.983616  |
| C          | 4.608216       | 0.572622  | 3.280041  | C          | -0.301680      | 0.826144  | 2.279419  | C          | -1.256462      | -0.476466 | 2.238610  |
| C          | 4.853132       | 0.049005  | 4.563866  | C          | -0.106519      | -0.340951 | 3.039660  | C          | -0.981131      | 0.739006  | 2.890884  |
| C          | 3.817550       | 0.049641  | 5.507019  | C          | 0.710040       | -1.355723 | 2.526442  | C          | -0.117087      | 1.657716  | 2.284473  |
| C          | 6.175861       | -0.612045 | 4.907687  | C          | -0.877349      | -0.566719 | 4.326391  | C          | -1.727865      | 1.110956  | 4.155477  |
| C          | 6.441921       | -1.756599 | 3.959447  | C          | -2.354185      | -0.603502 | 4.014164  | C          | -3.208069      | 1.182997  | 3.858300  |
| C          | 6.356662       | -3.093004 | 4.350954  | C          | -3.091594      | -1.785772 | 4.036986  | C          | -3.890388      | 2.397033  | 3.797406  |
| C          | 6.597461       | -4.126905 | 3.443945  | C          | -4.450340      | -1.797141 | 3.711325  | C          | -5.263034      | 2.443154  | 3.536740  |
| C          | 6.921877       | -3.817444 | 2.123779  | C          | -5.074298      | -0.607150 | 3.343692  | C          | -5.955936      | 1.255043  | 3.314604  |
| C          | 6.997540       | -2.484484 | 1.711028  | C          | -4.345453      | 0.583902  | 3.300250  | C          | -5.281558      | 0.033008  | 3.344193  |
| C          | 6.755877       | -1.444112 | 2.621189  | C          | -2.984107      | 0.602743  | 3.636311  | C          | -3.904599      | -0.023147 | 3.612464  |
| C          | 5.651260       | 0.740181  | 2.173851  | C          | -1.136595      | 2.026215  | 2.717907  | C          | -2.093302      | -1.603850 | 2.829292  |
| N          | 6.889698       | -0.066765 | 2.282207  | N          | -2.221284      | 1.800097  | 3.698876  | N          | -3.201546      | -1.245352 | 3.748056  |
| C          | 6.039500       | 2.234652  | 2.107761  | C          | -0.210972      | 3.129767  | 3.270102  | C          | -1.181303      | -2.610015 | 3.566235  |
| C          | 7.802487       | 0.216620  | 1.170829  | C          | -2.978149      | 3.040097  | 3.894219  | C          | -3.986160      | -2.442908 | 4.044394  |
| C          | 8.172317       | 1.694986  | 1.142962  | C          | -2.065525      | 4.134477  | 4.434786  | C          | -3.108892      | -3.485278 | 4.733946  |
| N          | 6.964602       | 2.516681  | 0.999866  | N          | -0.940072      | 4.381476  | 3.523563  | N          | -1.925688      | -3.828244 | 3.932014  |
| C          | 7.279874       | 3.946180  | 0.922267  | C          | -0.043468      | 5.402032  | 4.078269  | C          | -1.070384      | -4.773173 | 4.659870  |
| H          | 1.770083       | 0.541075  | 5.959778  | H          | 1.930983       | -2.056754 | 0.905017  | H          | 1.122910       | 2.136559  | 0.594802  |
| H          | 1.318717       | 1.429089  | 3.668130  | H          | 1.610279       | 0.031598  | -0.444963 | H          | 0.613844       | -0.011348 | -0.584290 |
| H          | 3.124656       | 1.438551  | 1.986760  | H          | 0.182011       | 1.839660  | 0.442928  | H          | -0.929343      | -1.635324 | 0.457922  |
| H          | 4.011222       | -0.363954 | 6.493541  | H          | 0.842879       | -2.265696 | 3.106749  | H          | 0.074314       | 2.608618  | 2.775057  |
| H          | 6.148716       | -0.970971 | 5.940580  | H          | -0.560424      | -1.505523 | 4.789399  | H          | -1.368762      | 2.072947  | 4.531698  |
| H          | 6.994616       | 0.112855  | 4.823426  | H          | -0.682085      | 0.244475  | 5.038324  | H          | -1.558945      | 0.360409  | 4.937973  |
| H          | 6.112269       | -3.325189 | 5.384556  | H          | -2.596743      | -2.709784 | 4.325484  | H          | -3.339873      | 3.320174  | 3.956136  |
| H          | 6.537637       | -5.161591 | 3.767518  | H          | -5.004908      | -2.729970 | 3.745409  | H          | -5.784089      | 3.396636  | 3.528525  |
| H          | 7.117547       | -4.612022 | 1.408513  | H          | -6.123994      | -0.593770 | 3.068743  | H          | -7.020951      | 1.272717  | 3.104689  |
| H          | 7.226695       | -2.256292 | 0.676674  | H          | -4.839918      | 1.496837  | 2.986581  | H          | -5.834804      | -0.881092 | 3.158340  |
| H          | 5.151828       | 0.492478  | 1.223223  | H          | -1.591872      | 2.427489  | 1.797449  | H          | -2.524465      | -2.149319 | 1.974029  |
| H          | 6.482381       | 2.528041  | 3.076024  | H          | 0.273172       | 2.753806  | 4.189377  | H          | -0.758887      | -2.115906 | 4.459000  |
| H          | 5.139149       | 2.831731  | 1.946629  | H          | 0.575249       | 3.336926  | 2.538639  | H          | -0.354778      | -2.910741 | 2.917932  |
| H          | 7.375185       | -0.058967 | 0.193950  | H          | -3.443577      | 3.400551  | 2.962146  | H          | -4.435245      | -2.876171 | 3.133695  |
| H          | 8.709445       | -0.377037 | 1.316455  | H          | -3.770937      | 2.849947  | 4.622420  | H          | -4.797690      | -2.173451 | 4.725023  |
| H          | 8.832719       | 1.889809  | 0.290756  | H          | -2.634698      | 5.064014  | 4.542883  | H          | -3.689776      | -4.398873 | 4.903935  |
| H          | 8.718947       | 1.958329  | 2.065702  | H          | -1.698763      | 3.840141  | 5.434642  | H          | -2.804145      | -3.091037 | 5.719762  |
| H          | 7.746523       | 4.321567  | 1.848517  | H          | 0.374307       | 5.101169  | 5.054424  | H          | -0.689864      | -4.344615 | 5.602773  |
| H          | 6.361809       | 4.502853  | 0.724520  | H          | 0.781037       | 5.587809  | 3.385824  | H          | -0.234314      | -5.060459 | 4.022192  |
| H          | 7.974903       | 4.118131  | 0.094590  | H          | -0.596549      | 6.336230  | 4.212045  | H          | -1.649038      | -5.670303 | 4.901123  |
| <b>NR1</b> |                |           |           | <b>NR1</b> |                |           |           | <b>NR1</b> |                |           |           |
| E          | -5082.91059654 |           |           | E          | -5082.91354642 |           |           | E          | -5082.87810585 |           |           |
| ZPE        | -5081.339502   |           |           | ZPE        | -5081.342372   |           |           |            |                |           |           |
| H          | -5081.249673   |           |           | H          | -5081.252671   |           |           |            |                |           |           |
| G          | -5081.461603   |           |           | G          | -5081.463606   |           |           |            |                |           |           |
| S          | 446.043        |           |           | S          | 443.949        |           |           |            |                |           |           |

|   |          |           |           |   |           |           |           |   |           |           |           |
|---|----------|-----------|-----------|---|-----------|-----------|-----------|---|-----------|-----------|-----------|
| O | 5.785365 | 3.565024  | -0.548862 | O | -6.327587 | 2.606637  | -0.457554 | C | -5.235286 | -0.482332 | -2.511554 |
| C | 4.357226 | 3.619105  | -0.776628 | C | -5.769952 | 1.277980  | -0.324450 | C | -5.709073 | -1.462012 | -1.435392 |
| C | 3.800763 | 4.732098  | 0.124617  | C | -6.338106 | 0.681288  | 0.972617  | O | -6.175826 | -0.729262 | -0.307532 |
| C | 4.118133 | 4.426250  | 1.590665  | C | -5.957377 | 1.564664  | 2.163777  | C | -4.586928 | -2.412708 | -1.038638 |
| C | 5.612426 | 4.196041  | 1.779522  | C | -6.390603 | 3.006242  | 1.926534  | O | -5.156584 | -3.344142 | -0.142853 |
| C | 6.127084 | 3.166924  | 0.764860  | C | -5.901856 | 3.495422  | 0.557071  | C | -3.954319 | -3.083526 | -2.263798 |
| H | 3.904904 | 2.668136  | -0.475352 | H | -4.681229 | 1.348295  | -0.226372 | O | -2.757932 | -3.711405 | -1.793726 |
| H | 4.253731 | 5.693100  | -0.157024 | H | -7.432645 | 0.614191  | 0.898589  | C | -3.610140 | -2.039789 | -3.342373 |
| H | 3.590298 | 3.496673  | 1.854402  | H | -4.859717 | 1.544547  | 2.248864  | O | -4.766046 | -1.225241 | -3.626865 |
| H | 6.133894 | 5.144199  | 1.581529  | H | -7.490161 | 3.036307  | 1.914076  | C | -3.167838 | -2.638493 | -4.663426 |
| H | 7.221684 | 3.121103  | 0.786514  | H | -6.352544 | 4.463843  | 0.312555  | O | -2.667694 | -1.571258 | -5.464171 |
| C | 4.127883 | 3.781675  | -2.290629 | C | -6.067789 | 0.510507  | -1.625322 | C | -2.516707 | -5.076820 | -2.052880 |
| O | 2.378845 | 4.818643  | 0.053465  | O | -5.784338 | -0.601037 | 1.261579  | C | -2.348419 | -5.827593 | -0.723549 |
| O | 3.740043 | 5.483360  | 2.454126  | O | -6.564786 | 1.133451  | 3.368046  | O | -3.505980 | -5.648532 | 0.087989  |
| O | 5.913022 | 3.736095  | 3.092866  | O | -5.887272 | 3.879490  | 2.932069  | C | -1.096022 | -5.358549 | 0.005429  |
| O | 5.570522 | 1.918784  | 1.084819  | O | -4.502296 | 3.594750  | 0.598590  | O | -0.971218 | -6.178010 | 1.156869  |
| H | 3.537327 | 4.675881  | -2.498587 | H | -6.598158 | -0.419458 | -1.412040 | C | 0.103230  | -5.468879 | -0.928972 |
| O | 3.403388 | 2.692471  | -2.850736 | O | -4.883594 | 0.135870  | -2.320054 | O | 1.243306  | -4.925445 | -0.250840 |
| H | 5.109091 | 3.896373  | -2.770037 | H | -6.713913 | 1.141343  | -2.249914 | C | -0.152185 | -4.711798 | -2.235992 |
| H | 2.798291 | 5.680789  | 2.294187  | H | -6.349748 | 0.190226  | 3.493596  | O | -1.355223 | -5.240731 | -2.840773 |
| H | 5.415772 | 4.309318  | 3.695354  | H | -6.063346 | 3.440246  | 3.777602  | C | 0.999259  | -4.840888 | -3.246122 |
| H | 3.924996 | 1.867401  | -2.735558 | H | -4.395659 | 0.944595  | -2.592350 | O | 1.654324  | -6.095586 | -3.245669 |
| O | 6.813053 | -1.340164 | -0.089193 | O | -2.428881 | 5.505346  | -1.769395 | C | 2.286594  | -5.810370 | 0.069052  |
| C | 5.991562 | -0.152077 | -0.175419 | C | -3.120466 | 4.322650  | -1.304564 | C | 2.757111  | -5.549456 | 1.500355  |
| C | 6.386356 | 0.751710  | 1.003098  | C | -3.864819 | 4.712270  | -0.017519 | O | 1.646160  | -5.684589 | 2.385545  |
| C | 6.158903 | 0.013884  | 2.325075  | C | -2.868512 | 5.223274  | 1.025333  | C | 3.400143  | -4.175750 | 1.628392  |
| C | 6.880830 | -1.327595 | 2.327861  | C | -2.020975 | 6.352959  | 0.455567  | O | 3.885112  | -4.080763 | 2.953309  |
| C | 6.547245 | -2.122385 | 1.058665  | C | -1.411784 | 5.946135  | -0.892863 | C | 4.501168  | -4.012173 | 0.582862  |
| H | 4.937830 | -0.429388 | -0.062329 | H | -2.388476 | 3.544611  | -1.061458 | O | 4.893674  | -2.639051 | 0.625788  |
| H | 7.444973 | 1.033804  | 0.914604  | H | -4.603036 | 5.495958  | -0.238908 | C | 3.990195  | -4.359439 | -0.826617 |
| H | 5.077744 | -0.177161 | 2.410631  | H | -2.200241 | 4.384406  | 1.276004  | O | 3.376963  | -5.669678 | -0.832158 |
| H | 7.963646 | -1.133668 | 2.318835  | H | -2.677961 | 7.215925  | 0.272386  | C | 5.090987  | -4.356537 | -1.874928 |
| H | 7.197396 | -3.000595 | 0.976678  | H | -0.954601 | 6.814101  | -1.381015 | O | 6.171563  | -5.161229 | -1.418544 |
| C | 6.165705 | 0.438759  | -1.586289 | C | -3.985801 | 3.800473  | -2.465158 | C | 6.270727  | -2.313169 | 0.642843  |
| O | 6.630882 | 0.750642  | 3.438492  | O | -3.511585 | 5.719595  | 2.185227  | C | 6.585189  | -1.547941 | 1.934991  |
| O | 6.531921 | -2.110580 | 3.464378  | O | -0.968813 | 6.717423  | 1.342483  | O | 6.182889  | -2.325586 | 3.062001  |
| O | 5.198226 | -2.508223 | 1.116277  | O | -0.452193 | 4.944234  | -0.667641 | C | 5.892894  | -0.191364 | 1.941116  |
| H | 6.462971 | 1.487513  | -1.531450 | H | -5.018076 | 3.657060  | -2.141457 | O | 6.328092  | 0.479982  | 3.110721  |
| O | 4.960410 | 0.412987  | -2.342108 | O | -3.548007 | 2.536062  | -2.948057 | C | 6.222060  | 0.571628  | 0.661051  |
| H | 6.964383 | -0.120929 | -2.090908 | H | -3.974913 | 4.556614  | -3.261414 | O | 5.440031  | 1.773047  | 0.680097  |
| H | 6.235910 | 1.641646  | 3.399290  | H | -4.129131 | 5.034780  | 2.503371  | C | 5.886030  | -0.274735 | -0.572018 |
| H | 6.590292 | -1.514745 | 4.226201  | H | -1.374452 | 6.797896  | 2.218736  | O | 6.612669  | -1.523587 | -0.475469 |
| H | 4.673761 | -0.519386 | -2.465727 | H | -2.630327 | 2.625263  | -3.289734 | C | 6.256608  | 0.392526  | -1.908741 |
| O | 3.732031 | -5.222632 | -0.894242 | O | 2.210349  | 4.211159  | -3.094251 | O | 7.368138  | 1.269163  | -1.832556 |
| C | 4.095004 | -3.845087 | -0.640283 | C | 0.901849  | 4.004341  | -2.518396 | C | 6.106510  | 3.006067  | 0.664974  |
| C | 4.838908 | -3.825618 | 0.704442  | C | 0.792801  | 5.011945  | -1.365802 | C | 5.489754  | 3.927548  | 1.719910  |
| C | 3.921813 | -4.355322 | 1.809328  | C | 1.856605  | 4.704509  | -0.301630 | O | 5.582245  | 3.308302  | 2.998839  |
| C | 3.384455 | -5.733601 | 1.445092  | C | 3.255716  | 4.665961  | -0.920422 | C | 4.040486  | 4.244426  | 1.371754  |
| C | 2.794187 | -5.738713 | 0.028652  | C | 3.254144  | 3.829860  | -2.220193 | O | 3.586182  | 5.173354  | 2.336283  |
| H | 3.186089 | -3.240138 | -0.548454 | H | 0.840374  | 2.989616  | -2.109912 | C | 3.911789  | 4.771649  | -0.061612 |

|   |           |           |           |   |           |           |           |   |           |           |           |
|---|-----------|-----------|-----------|---|-----------|-----------|-----------|---|-----------|-----------|-----------|
| H | 5.735541  | -4.457669 | 0.635656  | H | 0.947237  | 6.027043  | -1.757508 | O | 2.511018  | 4.782326  | -0.348341 |
| H | 3.070553  | -3.660909 | 1.891162  | H | 1.620547  | 3.705836  | 0.099378  | C | 4.649945  | 3.847321  | -1.045973 |
| H | 4.230778  | -6.436499 | 1.447273  | H | 3.509754  | 5.699118  | -1.201253 | O | 6.004380  | 3.636637  | -0.603482 |
| H | 2.599860  | -6.767630 | -0.293988 | H | 4.181659  | 4.012712  | -2.773870 | C | 4.742392  | 4.388069  | -2.459866 |
| C | 4.871842  | -3.332944 | -1.866899 | C | -0.138152 | 4.099741  | -3.650476 | O | 5.248191  | 3.334409  | -3.275390 |
| O | 4.592463  | -4.480985 | 3.049797  | O | 1.836801  | 5.676713  | 0.731072  | C | 1.901279  | 5.940835  | -0.876182 |
| O | 2.384386  | -6.169213 | 2.359482  | O | 4.264138  | 4.147254  | -0.069130 | C | 0.760363  | 6.374359  | 0.054356  |
| O | 1.604154  | -4.991057 | 0.028739  | O | 3.143804  | 2.471605  | -1.877809 | O | 1.269003  | 6.576359  | 1.371778  |
| H | 5.841204  | -2.928693 | -1.570726 | H | -0.859651 | 4.895652  | -3.460083 | C | -0.364188 | 5.345712  | 0.051880  |
| O | 4.197368  | -2.276199 | -2.539355 | O | -0.901491 | 2.905160  | -3.785810 | O | -1.405711 | 5.872251  | 0.855502  |
| H | 5.042984  | -4.185824 | -2.537041 | H | 0.398955  | 4.333889  | -4.578939 | C | -0.798788 | 5.074717  | -1.385448 |
| H | 5.039211  | -3.634838 | 3.239077  | H | 0.904230  | 5.843875  | 0.966718  | O | -1.783633 | 4.037924  | -1.354506 |
| H | 2.737359  | -5.996451 | 3.245029  | H | 3.971707  | 4.063995  | 0.878933  | C | 0.403699  | 4.653050  | -2.237365 |
| H | 3.330035  | -2.603460 | -2.866572 | H | -0.301489 | 2.162170  | -4.017673 | O | 1.397814  | 5.703648  | -2.173428 |
| O | -0.986211 | -5.318614 | -2.571256 | O | 4.099903  | -0.450315 | -3.877040 | C | 0.050084  | 4.403047  | -3.712706 |
| C | 0.179091  | -4.704267 | -1.972790 | C | 3.169044  | 0.512698  | -3.332629 | O | -0.979236 | 5.230010  | -4.222896 |
| C | 0.485787  | -5.503283 | -0.695275 | C | 3.991014  | 1.532919  | -2.536985 | C | -3.067888 | 4.329094  | -1.855091 |
| C | -0.707427 | -5.407670 | 0.258602  | C | 4.796455  | 0.843039  | -1.432772 | C | -4.126553 | 3.880781  | -0.830416 |
| C | -1.971828 | -5.901351 | -0.436201 | C | 5.623924  | -0.308657 | -1.994142 | O | -3.808439 | 4.492751  | 0.409088  |
| C | -2.154206 | -5.183345 | -1.781311 | C | 4.746761  | -1.212840 | -2.874196 | C | -4.207259 | 2.358548  | -0.763930 |
| H | -0.058569 | -3.672490 | -1.691920 | H | 2.480328  | 0.006605  | -2.648227 | O | -5.338733 | 2.012897  | 0.015342  |
| H | 0.662500  | -6.555112 | -0.960912 | H | 4.679130  | 2.053554  | -3.217696 | C | -4.298971 | 1.753974  | -2.168251 |
| H | -0.848781 | -4.347603 | 0.516381  | H | 4.076540  | 0.424296  | -0.712765 | O | -4.222798 | 0.334793  | -1.983304 |
| H | -1.849968 | -6.974400 | -0.646830 | H | 6.412732  | 0.114318  | -2.633795 | C | -3.162964 | 2.257152  | -3.062948 |
| H | -2.958668 | -5.651225 | -2.359568 | H | 5.364339  | -1.944532 | -3.407023 | O | -3.268078 | 3.704839  | -3.115040 |
| C | 1.282999  | -4.644080 | -3.044520 | C | 2.334338  | 1.083968  | -4.493062 | C | -3.186072 | 1.706733  | -4.500132 |
| O | -0.531621 | -6.186850 | 0.440225  | O | 5.679847  | 1.751705  | -0.794518 | O | -4.478028 | 1.364758  | -4.973178 |
| O | -3.132602 | -5.688154 | 0.358251  | O | 6.198085  | -1.114226 | -0.970457 | H | -6.066691 | 0.120688  | -2.888131 |
| O | -2.441145 | -3.836066 | -1.524765 | O | 3.815972  | -1.853174 | -2.044186 | H | -6.530875 | -2.053124 | -1.864585 |
| H | 2.172245  | -5.188408 | -2.722021 | H | 2.453657  | 2.167922  | -4.556082 | H | -6.195040 | -1.348689 | 0.440044  |
| O | 1.711874  | -3.311637 | -3.304678 | O | 0.939868  | 0.851151  | -4.326941 | H | -3.794688 | -1.823651 | -0.551282 |
| H | 0.895433  | -5.121630 | -3.953940 | H | 2.703810  | 0.641177  | -5.427475 | H | -4.489845 | -4.027853 | 0.067474  |
| H | 0.357059  | -6.001946 | 1.788474  | H | 5.165530  | 2.546668  | -0.529196 | H | -4.650575 | -3.833249 | -2.664922 |
| H | -2.895160 | -5.948831 | 1.260393  | H | 6.559884  | -0.518667 | -0.297179 | H | -2.802867 | -1.405131 | -2.959045 |
| H | 0.956576  | -2.792655 | -3.659435 | H | 0.776829  | -0.117550 | -4.316085 | H | -4.030973 | -3.128153 | -5.138720 |
| O | -3.925981 | -1.407207 | -3.850540 | O | 1.848170  | -4.848897 | -2.862562 | H | -2.396784 | -3.396629 | -4.470330 |
| C | -2.829531 | -2.090847 | -3.199654 | C | 2.092337  | -3.423688 | -2.802992 | H | -2.508986 | -1.905070 | -6.355532 |
| C | -3.439710 | -3.177340 | -2.301293 | C | 3.514175  | -3.230287 | -2.254387 | H | -3.337786 | -5.509378 | -2.635394 |
| C | -4.394563 | -2.548954 | -1.282011 | C | 3.633791  | -3.874946 | -0.871371 | H | -2.228371 | -6.893885 | -0.963683 |
| C | -5.437667 | -1.686333 | -1.980476 | C | 3.186047  | -5.329513 | -0.904979 | H | -3.247761 | -5.955356 | 0.971728  |
| C | -4.755381 | -0.705963 | -2.945472 | C | 1.821246  | -5.465304 | -1.592064 | H | -1.224249 | -4.303737 | 0.289307  |
| H | -2.286442 | -1.383062 | -2.564481 | H | 1.386177  | -2.963588 | -2.103256 | H | -0.179051 | -5.901240 | 1.654270  |
| H | -3.985467 | -3.905657 | -2.917457 | H | 4.244381  | -3.681322 | -2.941058 | H | 0.281740  | -6.520643 | -1.179392 |
| H | -3.792653 | -1.902113 | -3.625573 | H | 2.965269  | -3.321609 | -0.195152 | H | -0.309229 | -3.646745 | -2.022228 |
| H | -6.088368 | -2.343245 | -2.576136 | H | 3.912323  | -5.898026 | -1.504709 | H | 1.706633  | -4.021613 | -3.059727 |
| H | -5.499746 | -0.187416 | -3.560317 | H | 1.593317  | -6.520730 | -1.779000 | H | 0.577384  | -4.688353 | -4.245049 |
| C | -1.857995 | -2.571417 | -4.291636 | C | 1.810202  | -2.837303 | -4.197387 | H | 2.346831  | -6.065581 | -2.564157 |
| O | -5.088199 | -3.525693 | -0.528652 | O | 4.964067  | -3.858343 | -0.385986 | H | 1.958524  | -6.849195 | -0.037572 |
| O | -6.215979 | -0.941044 | -1.049475 | O | 3.097774  | -5.880054 | 0.406167  | H | 3.516678  | -6.307200 | 1.739037  |
| O | -4.013886 | 0.209787  | -2.181690 | O | 0.839553  | -4.891085 | -0.763099 | H | 1.944402  | -5.339787 | 3.241038  |

|   |           |           |           |   |           |           |           |   |           |           |           |
|---|-----------|-----------|-----------|---|-----------|-----------|-----------|---|-----------|-----------|-----------|
| H | -1.671001 | -3.642779 | -4.195987 | H | 2.656602  | -2.239657 | -4.540481 | H | 2.633495  | -3.409478 | 1.432775  |
| O | -0.583775 | -1.941876 | -4.204211 | O | 0.685488  | -1.964616 | -4.207335 | H | 4.532131  | -3.348911 | 3.000717  |
| H | -2.326431 | -2.388108 | -5.267708 | H | 1.671497  | -3.673467 | -4.895690 | H | 5.343807  | -4.664520 | 0.834034  |
| H | -4.426314 | -4.088150 | -0.084850 | H | 5.273386  | -2.932998 | -0.391687 | H | 3.240135  | -3.611433 | -1.114822 |
| H | -6.403963 | -1.530786 | -0.302361 | H | 3.883990  | -5.565381 | 0.877891  | H | 5.406194  | -3.316105 | -2.027100 |
| H | -0.695450 | -0.972501 | -4.318882 | H | -0.114087 | -2.470541 | -3.942033 | H | 4.672026  | -4.738556 | -2.818084 |
| O | -2.896506 | 3.507767  | -3.337384 | O | -2.742308 | -5.705579 | -1.023047 | H | 6.898136  | -5.067182 | -2.046709 |
| C | -2.740067 | 2.084480  | -3.140231 | C | -1.564564 | -4.922887 | -1.332016 | H | 6.875984  | -3.221046 | 0.562568  |
| C | -4.047864 | 1.598270  | -2.506610 | C | -0.394001 | -5.581943 | -0.585495 | H | 7.671481  | -1.382275 | 1.968099  |
| C | -4.278825 | 2.293890  | -1.159256 | C | -0.666476 | -5.551545 | 0.920349  | H | 6.238538  | -1.722008 | 3.819634  |
| C | -4.189132 | 3.812865  | -1.277985 | C | -2.001947 | -6.220809 | 1.226090  | H | 4.804776  | -0.357333 | 1.966462  |
| C | -2.960408 | 4.221914  | -2.119785 | C | -3.115749 | -5.644246 | 0.339717  | H | 5.921535  | 1.367468  | 3.130783  |
| H | -1.919088 | 1.902634  | -2.438205 | H | -1.696047 | -3.903771 | -0.951970 | H | 7.288472  | 0.817624  | 0.629053  |
| H | -4.887320 | 1.811152  | -3.183237 | H | -0.292945 | -6.624404 | -0.919667 | H | 4.812033  | -0.501226 | -0.577324 |
| H | -3.471095 | 1.951418  | -0.492209 | H | -0.732835 | -4.495968 | 1.226633  | H | 5.380307  | 0.919405  | -2.299697 |
| H | -5.083089 | 4.152398  | -1.822182 | H | -1.908958 | -7.289343 | 0.981289  | H | 6.497446  | -0.415659 | -2.610276 |
| H | -3.042819 | 5.277406  | -2.401994 | H | -4.020782 | -6.255988 | 0.424881  | H | 7.007739  | 2.170390  | -1.818520 |
| C | -2.340035 | 1.448374  | -4.484112 | C | -1.446992 | -4.831691 | -2.865332 | H | 7.178422  | 2.875087  | 0.840824  |
| O | -5.548038 | 1.949025  | -0.629985 | O | 0.333753  | -6.226548 | 1.664360  | H | 6.063062  | 4.865905  | 1.715045  |
| O | -4.103299 | 4.483616  | -0.030245 | O | -2.376928 | -6.062418 | 2.590024  | H | 4.996536  | 3.814754  | 3.581998  |
| O | -1.799621 | 4.008371  | -1.353318 | O | -3.371800 | -4.324104 | 0.743971  | H | 3.465894  | 3.306684  | 1.422333  |
| H | -3.035560 | 0.654113  | -4.761243 | H | -0.489849 | -5.227532 | -3.208639 | H | 2.707101  | 5.504186  | 2.064183  |
| O | -1.053915 | 0.839489  | -4.437149 | O | -1.506460 | -3.490786 | -3.336507 | H | 4.322139  | 5.790082  | -0.110794 |
| H | -2.382245 | 2.229809  | -5.254462 | H | -2.249781 | -5.441828 | -3.300192 | H | 4.120290  | 2.887688  | -1.073518 |
| H | -5.648891 | 0.979757  | -0.714008 | H | 1.206604  | -5.963628 | 1.313108  | H | 5.415220  | 5.258582  | -2.464439 |
| H | -4.405939 | 3.924543  | 0.728596  | H | -1.591433 | -6.278620 | 3.113843  | H | 3.745630  | 4.712222  | -2.787414 |
| H | -0.380181 | 1.528109  | -4.244182 | H | -2.378956 | -3.107055 | -3.096786 | H | 5.456935  | 3.691636  | -4.147082 |
| O | 1.426731  | 5.687421  | -1.887501 | O | -6.413109 | -2.411891 | -0.061716 | H | 2.635877  | 6.746916  | -0.981995 |
| C | 0.492293  | 4.590023  | -2.017562 | C | -5.044278 | -2.830887 | -0.274597 | H | 0.359208  | 7.320880  | -0.334890 |
| C | -0.807386 | 5.028913  | -1.327409 | C | -4.726306 | -3.879469 | 0.802783  | H | 0.487600  | 6.680126  | 1.936552  |
| C | -0.537047 | 5.324297  | 0.149681  | C | -4.899446 | -3.264297 | 2.193923  | H | 0.020019  | 4.404708  | 0.475579  |
| C | 0.574716  | 6.360214  | 0.278181  | C | -6.293005 | -2.664834 | 2.341430  | H | -2.218172 | 5.336769  | 0.708730  |
| C | 1.800276  | 5.947401  | -0.548485 | C | -6.608216 | -1.733397 | 1.163815  | H | -1.222646 | 5.984822  | -1.824694 |
| H | 0.889611  | 3.711500  | -1.497757 | H | -4.376322 | -1.973464 | -0.137904 | H | 0.843493  | 3.735846  | -1.825037 |
| H | -1.185662 | 5.936758  | -1.818705 | H | -5.409191 | -4.733530 | 0.692147  | H | -0.202796 | 3.340943  | -3.825911 |
| H | -0.194805 | 4.387912  | 0.617470  | H | -4.161084 | -2.453232 | 2.291456  | H | 0.955033  | 4.588914  | -4.301355 |
| H | 0.203300  | 7.309041  | -0.136390 | H | -7.022413 | -3.487923 | 2.313548  | H | -1.819286 | 4.761183  | -4.083224 |
| H | 2.520715  | 6.771586  | -0.597490 | H | -7.665350 | -1.445390 | 1.177525  | H | -3.169799 | 5.402549  | -2.044251 |
| C | 0.381995  | 4.234243  | -3.511792 | C | -4.918584 | -3.288702 | -1.739285 | H | -5.100948 | 4.244971  | -1.188489 |
| O | -1.680416 | 5.831463  | 0.816822  | O | -4.741011 | -4.218986 | 3.227587  | H | -4.066457 | 3.947757  | 1.195101  |
| O | 0.978778  | 6.543864  | 1.631500  | O | -6.427430 | -1.932747 | 3.554851  | H | -3.281205 | 1.976717  | -0.304575 |
| H | -0.647985 | 4.334402  | -3.859763 | H | -4.568636 | -4.321222 | -1.794318 | H | -5.488691 | 1.049402  | -0.070226 |
| O | 0.757376  | 2.888265  | -3.779755 | O | -3.976264 | -2.514734 | -2.472313 | H | -5.252596 | 2.024071  | -2.633705 |
| H | 1.006962  | 4.941136  | -4.073621 | H | -5.916402 | -3.237493 | -2.194767 | H | -2.198526 | 2.003852  | -2.605334 |
| H | -2.460608 | 5.305185  | 0.534884  | H | -3.881726 | -4.662730 | 3.100309  | H | -2.518563 | 0.840875  | -4.556935 |
| H | 0.163149  | 6.647302  | 2.143314  | H | -6.046908 | -2.493196 | 4.247602  | H | -2.771612 | 2.487112  | -5.150868 |
| H | 1.696396  | 2.763194  | -3.519851 | H | -4.270961 | -1.577346 | -2.490188 | H | -4.544419 | 0.398482  | -4.902169 |
| C | -7.955434 | -1.795030 | 3.433823  | C | 8.104244  | -0.960702 | 3.588161  | C | -6.862389 | -1.937889 | 4.414869  |
| C | -8.033530 | -0.919695 | 2.351222  | C | 8.092069  | -0.075269 | 2.511409  | C | -7.191857 | -1.052614 | 3.389175  |
| C | -6.984135 | -0.035400 | 2.107209  | C | 6.926100  | 0.629383  | 2.214608  | C | -6.255635 | -0.108022 | 2.972394  |

|           |                |           |           |           |                |           |           |           |                |           |           |
|-----------|----------------|-----------|-----------|-----------|----------------|-----------|-----------|-----------|----------------|-----------|-----------|
| C         | -5.844030      | 0.000664  | 2.926494  | C         | 5.758151       | 0.473857  | 2.979634  | C         | -4.983062      | -0.019668 | 3.560216  |
| C         | -5.761243      | -0.894344 | 4.008537  | C         | 5.765529       | -0.437619 | 4.051970  | C         | -4.648559      | -0.923393 | 4.585260  |
| C         | -6.822144      | -1.778936 | 4.243273  | C         | 6.943641       | -1.140142 | 4.337366  | C         | -5.597902      | -1.869480 | 4.994483  |
| C         | -4.502715      | -0.991206 | 4.850311  | C         | 4.497474       | -0.754398 | 4.824391  | C         | -3.251717      | -0.959372 | 5.177872  |
| C         | -3.324623      | -1.338370 | 3.971941  | C         | 3.441992       | -1.282733 | 3.881710  | C         | -2.236722      | -1.222594 | 4.091491  |
| C         | -2.730705      | -2.599839 | 3.982359  | C         | 3.047770       | -2.620443 | 3.867429  | C         | -1.566397      | -2.438976 | 3.970596  |
| C         | -1.647778      | -2.897311 | 3.150579  | C         | 2.081669       | -3.080501 | 2.968141  | C         | -0.641306      | -2.656088 | 2.945670  |
| C         | -1.156772      | -1.912327 | 2.296068  | C         | 1.510710       | -2.184786 | 2.065880  | C         | -0.393607      | -1.640294 | 2.024938  |
| C         | -1.751286      | -0.648567 | 2.259765  | C         | 1.899350       | -0.843248 | 2.061238  | C         | -1.064454      | -0.419078 | 2.125179  |
| C         | -2.842887      | -0.349124 | 3.087663  | C         | 2.865223       | -0.378464 | 2.964469  | C         | -1.991254      | -0.196852 | 3.153541  |
| C         | -4.819593      | 1.083574  | 2.586178  | C         | 4.592006       | 1.387866  | 2.605561  | C         | -4.101109      | 1.123191  | 3.056192  |
| N         | -3.450426      | 0.938856  | 3.140053  | N         | 3.239722       | 0.992153  | 3.062719  | N         | -2.649396      | 1.051287  | 3.352078  |
| C         | -5.387365      | 2.446335  | 3.034068  | C         | 4.886630       | 2.808499  | 3.135817  | C         | -4.653782      | 2.447581  | 3.623159  |
| C         | -2.604129      | 2.049308  | 2.699237  | C         | 2.245116       | 1.953012  | 2.585605  | C         | -1.953974      | 2.217298  | 2.804078  |
| C         | -3.181056      | 3.389787  | 3.139898  | C         | 2.544536       | 3.350067  | 3.118101  | C         | -2.517851      | 3.511995  | 3.377112  |
| N         | -4.537564      | 3.562997  | 2.604338  | N         | 3.880130       | 3.781254  | 2.687723  | N         | -3.951348      | 3.613156  | 3.075116  |
| C         | -5.108388      | 4.849766  | 3.011199  | C         | 4.187616       | 5.133681  | 3.164980  | C         | -4.518371      | 4.864144  | 3.583893  |
| H         | -8.762440      | -2.492027 | 3.639527  | H         | 9.002937       | -1.518670 | 3.833953  | H         | -7.577654      | -2.681792 | 4.752980  |
| H         | -8.903551      | -0.920679 | 1.701117  | H         | 8.981597       | 0.067830  | 1.904787  | H         | -8.169192      | -1.092441 | 2.917140  |
| H         | -7.047726      | 0.650048  | 1.266370  | H         | 6.909582       | 1.311401  | 1.367746  | H         | -6.514971      | 0.584807  | 2.176089  |
| H         | -6.746646      | -2.473791 | 5.075877  | H         | 6.940832       | -1.849081 | 5.161469  | H         | -5.329125      | -2.570259 | 5.780896  |
| H         | -4.636289      | -1.750527 | 5.626158  | H         | 4.715820       | -1.490265 | 5.603567  | H         | -3.198235      | -1.736742 | 5.945443  |
| H         | -4.304253      | -0.033407 | 5.346491  | H         | 4.114780       | 0.150167  | 5.312764  | H         | -3.018979      | 0.000965  | 5.653852  |
| H         | -3.114310      | -3.356006 | 4.662996  | H         | 3.495005       | -3.308562 | 4.580640  | H         | -1.761433      | -3.222292 | 4.698962  |
| H         | -1.199603      | -3.886626 | 3.164305  | H         | 1.769606       | -4.120565 | 2.973699  | H         | -0.113607      | -3.601461 | 2.868749  |
| H         | -0.310015      | -2.122890 | 1.648817  | H         | 0.768648       | -2.528854 | 1.351655  | H         | 0.320275       | -1.797066 | 1.221119  |
| H         | -1.362132      | 0.099239  | 1.577823  | H         | 1.448310       | -0.163212 | 1.346993  | H         | -0.863774      | 0.357951  | 1.395798  |
| H         | -4.756040      | 1.121407  | 1.488110  | H         | 4.588999       | 1.457635  | 1.505235  | H         | -4.240895      | 1.174045  | 1.965528  |
| H         | -5.507009      | 2.436935  | 4.132703  | H         | 4.939586       | 2.770872  | 4.238423  | H         | -4.580753      | 2.420964  | 4.725640  |
| H         | -6.376533      | 2.579569  | 2.589308  | H         | 5.863821       | 3.130412  | 2.765206  | H         | -5.710761      | 2.529940  | 3.358652  |
| H         | -2.478998      | 2.071201  | 1.602036  | H         | 2.211108       | 1.993685  | 1.482316  | H         | -2.024900      | 2.271469  | 1.703396  |
| H         | -1.612579      | 1.922951  | 3.142626  | H         | 1.260226       | 1.636511  | 2.939222  | H         | -0.894942      | 2.138396  | 3.065088  |
| H         | -2.549581      | 4.199693  | 2.758870  | H         | 1.815199       | 4.063421  | 2.724151  | H         | -2.001867      | 4.363333  | 2.920971  |
| H         | -3.185328      | 3.442666  | 4.243418  | H         | 2.469969       | 3.343929  | 4.219957  | H         | -2.342157      | 3.541537  | 4.467383  |
| H         | -5.198178      | 4.941959  | 4.107005  | H         | 4.175033       | 5.201854  | 4.265693  | H         | -4.428748      | 4.952308  | 4.680074  |
| H         | -6.102927      | 4.964788  | 2.571176  | H         | 5.180601       | 5.425593  | 2.811177  | H         | -5.577749      | 4.920848  | 3.318142  |
| H         | -4.474818      | 5.661721  | 2.643977  | H         | 3.454276       | 5.828110  | 2.749237  | H         | -4.003148      | 5.711415  | 3.123100  |
| <b>M1</b> |                |           |           | <b>M1</b> |                |           |           | <b>M1</b> |                |           |           |
| E         | -5082.90247642 |           |           | E         | -5082.89931164 |           |           | E         | -5082.86441528 |           |           |
| O         | 5.437453       | 1.260871  | -2.364448 | O         | 1.159170       | 5.954449  | -1.426599 | C         | 0.674040       | 5.866203  | -0.532406 |
| C         | 4.280781       | 2.009516  | -1.925511 | C         | -0.008764      | 5.148518  | -1.142672 | C         | 0.074692       | 5.891874  | 0.879186  |
| C         | 4.750268       | 2.952103  | -0.806256 | C         | -0.700389      | 5.781105  | 0.074681  | O         | 1.083132       | 5.533546  | 1.815587  |
| C         | 5.349641       | 2.134459  | 0.339766  | C         | 0.258236       | 5.774886  | 1.268465  | C         | -1.126501      | 4.953874  | 0.959597  |
| C         | 6.456128       | 1.219156  | -0.172014 | C         | 1.568217       | 6.465791  | 0.903450  | O         | -1.672768      | 5.083526  | 2.257092  |
| C         | 5.950455       | 0.397186  | -1.365665 | C         | 2.138553       | 5.905403  | -0.406829 | C         | -2.140694      | 5.250783  | -0.154161 |
| H         | 3.540247       | 1.319434  | -1.507554 | H         | 0.305787       | 4.133731  | -0.876619 | O         | -3.102620      | 4.190772  | -0.102741 |
| H         | 5.504186       | 3.647473  | -1.201262 | H         | -0.982625      | 6.816243  | -0.164047 | C         | -1.414538      | 5.265505  | -1.510261 |
| H         | 4.549065       | 1.504721  | 0.752953  | H         | 0.475169       | 4.723042  | 1.512987  | O         | -0.336187      | 6.210183  | -1.464719 |
| H         | 7.286520       | 1.845821  | -0.530675 | H         | 1.351533       | 7.531309  | 0.735359  | C         | -2.261139      | 5.644826  | -2.708826 |
| H         | 6.777116       | -0.145872 | -1.837207 | H         | 2.964068       | 6.533058  | -0.760838 | O         | -1.476553      | 5.345978  | -3.867041 |

|   |           |           |           |   |           |           |           |   |           |           |           |
|---|-----------|-----------|-----------|---|-----------|-----------|-----------|---|-----------|-----------|-----------|
| C | 3.647713  | 2.669861  | -3.162424 | C | -0.838513 | 5.052038  | -2.435534 | C | -4.486024 | 4.486158  | -0.140849 |
| O | 3.665790  | 3.680426  | -0.227943 | O | -1.848105 | 5.045310  | 0.495650  | C | -5.149889 | 3.991153  | 1.149484  |
| O | 5.907314  | 2.957945  | 1.352155  | O | -0.275794 | 6.454326  | 2.390054  | O | -4.500533 | 4.577395  | 2.275855  |
| O | 6.914877  | 0.326530  | 0.836210  | O | 2.546619  | 6.320740  | 1.926912  | C | -5.114764 | 2.471275  | 1.238213  |
| O | 4.967685  | -0.491067 | -0.904907 | O | 2.579604  | 6.529602  | -0.176823 | O | -5.856259 | 2.125617  | 2.393557  |
| H | 3.563855  | 3.749425  | -3.025454 | H | -1.850660 | 5.427987  | -2.276770 | C | -5.680094 | 1.857008  | -0.039663 |
| O | 2.325077  | 2.201545  | -3.409126 | O | -0.983311 | 3.709574  | -2.887160 | O | -5.446587 | 0.445630  | 0.033379  |
| H | 4.302674  | 2.479381  | -4.022484 | H | -0.352476 | 5.676644  | -3.196402 | C | -4.984557 | 2.434927  | -1.278098 |
| H | 5.227306  | 3.603749  | 1.620980  | H | -1.158011 | 6.082347  | 2.576038  | O | -5.103176 | 3.877958  | -1.254513 |
| H | 6.987646  | 0.852137  | 1.646382  | H | 2.095776  | 6.528063  | 2.758989  | C | -5.566138 | 1.917147  | -2.609125 |
| H | 2.353758  | 1.239145  | -3.611166 | H | -0.096341 | 3.350065  | -3.112964 | O | -6.923166 | 1.512739  | -2.552753 |
| O | 3.797826  | -3.488885 | -2.691653 | O | 4.868655  | 2.673760  | -2.327264 | C | -6.541713 | -0.433320 | -0.011423 |
| C | 3.766320  | -2.084005 | -2.345546 | C | 3.569864  | 3.122300  | -1.878005 | C | -6.456587 | -1.411683 | 1.159988  |
| C | 4.946160  | -1.830637 | -1.393379 | C | 3.805040  | 4.159744  | -0.769708 | O | -6.477052 | -0.683211 | 2.385226  |
| C | 4.796663  | -2.705386 | -0.146091 | C | 4.601255  | 3.525508  | 0.373170  | C | -5.198994 | -2.263353 | 1.055188  |
| C | 4.626629  | -4.170777 | -0.524272 | C | 5.877086  | 2.865933  | -0.138592 | O | -5.244613 | -3.178954 | 2.133594  |
| C | 3.543593  | -4.346676 | -1.596749 | C | 5.578675  | 1.952491  | -1.337083 | C | -5.145162 | -2.952626 | -0.305953 |
| H | 2.836010  | -1.861397 | -1.811653 | H | 3.026485  | 2.275800  | -1.446624 | O | -3.838923 | -3.526918 | -0.420661 |
| H | 5.891682  | -2.065304 | -1.902369 | H | 4.356402  | 5.019599  | -1.175083 | C | -5.366470 | -1.954176 | -1.459720 |
| H | 3.889465  | -2.371882 | 0.379914  | H | 3.966575  | 2.743275  | 0.812940  | O | -6.554498 | -1.160240 | -1.233703 |
| H | 5.574246  | -4.519195 | -0.961604 | H | 6.550250  | 3.659427  | -0.496944 | C | -5.508458 | -2.640713 | -2.808669 |
| H | 3.580033  | -5.362713 | -2.005386 | H | 6.512374  | 1.634037  | -1.813337 | O | -6.493858 | -3.662182 | -2.713696 |
| C | 3.754084  | -1.277992 | -3.656698 | C | 2.773969  | 3.594218  | -3.107317 | C | -3.707309 | -4.866959 | -0.862893 |
| O | 5.925610  | -2.624792 | 0.705352  | O | 4.974857  | 4.472294  | 1.359127  | C | -3.091323 | -5.711566 | 0.261579  |
| O | 4.289381  | -4.966689 | 0.607782  | O | 6.513707  | 2.098090  | 0.874518  | O | -3.891694 | -5.612633 | 1.438644  |
| O | 2.285345  | -4.094317 | -1.023161 | O | 4.848306  | 0.838351  | -0.890889 | C | -1.667254 | -5.254947 | 0.543144  |
| H | 4.551265  | -0.532745 | -3.658302 | H | 2.421321  | 4.617947  | -2.970457 | O | -1.142027 | -6.122548 | 1.538328  |
| O | 2.543585  | -0.552590 | -3.846453 | O | 1.611260  | 2.803180  | -3.331625 | C | -0.851063 | -5.261637 | -0.746992 |
| H | 3.931959  | -1.976342 | -4.485156 | H | 3.443900  | 3.571445  | -3.976659 | O | 0.438866  | -4.708338 | -0.459653 |
| H | 6.068041  | -1.685192 | 0.923320  | H | 4.166156  | 4.931484  | 1.652915  | C | -1.546375 | -4.429504 | -1.830313 |
| H | 4.898864  | -4.694759 | 1.310142  | H | 6.517247  | 2.651717  | 1.669282  | O | -2.890667 | -4.934552 | -2.009659 |
| H | 1.789666  | -1.180632 | -3.901664 | H | 1.884449  | 1.882463  | -3.547969 | C | -4.472839 | -4.472839 | -3.190497 |
| O | -0.882624 | -5.268226 | -2.494928 | O | 4.503139  | -2.323568 | -2.756760 | O | -0.319604 | -5.746238 | -3.521540 |
| C | 0.165019  | -4.293523 | -2.276841 | C | 4.097901  | -0.987304 | -2.376370 | C | 1.493871  | -5.627707 | -0.316980 |
| C | 1.202127  | -4.960817 | -1.359896 | C | 5.166252  | -0.456962 | -1.405906 | C | 2.367012  | -5.241560 | 0.881084  |
| C | 0.542189  | -5.333850 | -0.029985 | C | 5.235117  | -1.370606 | -0.179715 | O | 1.545784  | -5.133314 | 2.041664  |
| C | -0.680161 | -6.212530 | -0.273573 | C | 5.456130  | -2.822015 | -0.589652 | C | 3.136234  | -3.948659 | 0.628833  |
| C | -1.607579 | -5.582279 | -1.321905 | C | 4.471463  | -3.249619 | -1.687500 | O | 4.037430  | -3.813471 | 1.706730  |
| H | -0.251030 | -3.423014 | -1.759103 | H | 3.141603  | -1.037902 | -1.844845 | C | 3.843085  | -3.952316 | -0.735279 |
| H | 1.585546  | -5.868750 | -1.846653 | H | 6.143410  | -0.432253 | -1.907817 | O | 4.252814  | -2.601480 | -0.965425 |
| H | 0.211041  | -4.400106 | 0.450945  | H | 4.266239  | -1.300074 | 0.337019  | C | 2.866219  | -4.403266 | -1.832208 |
| H | -0.329149 | -7.171938 | -0.682082 | H | 6.468031  | -2.901105 | -1.014569 | O | 2.299850  | -5.673431 | -1.479072 |
| H | -2.373974 | -6.301383 | -1.631950 | H | 4.781301  | -4.207189 | -2.120917 | C | 3.477120  | -4.576647 | -3.208189 |
| C | 0.658460  | -3.817196 | -3.654483 | C | 3.868547  | -0.181785 | -3.667627 | O | 2.390036  | -4.743574 | -4.123729 |
| O | 1.415105  | -6.055943 | 0.820337  | O | 6.297599  | -1.025552 | 0.689572  | C | 5.585664  | -2.301618 | -1.320560 |
| O | -1.422656 | -6.432274 | 0.920570  | O | 5.324134  | -3.701520 | 0.522516  | C | 6.196136  | -1.376095 | -0.263100 |
| O | -2.200573 | -4.438275 | -0.764276 | O | 3.184283  | -3.355522 | -1.134065 | O | 6.165531  | -2.019436 | 1.009746  |
| H | 1.731038  | -3.984749 | -3.764353 | H | 4.457502  | 0.736888  | -3.661087 | C | 5.442211  | -0.053940 | -0.216230 |
| O | 0.459098  | -2.420258 | -3.849750 | O | 2.513639  | 0.225676  | -3.826322 | O | 6.105602  | 0.761138  | 0.735080  |
| H | 0.135596  | -4.402449 | -4.422049 | H | 4.198718  | -0.798369 | -4.513958 | C | 5.380131  | 0.574710  | -1.604663 |

|   |           |           |           |   |           |           |           |   |           |           |           |
|---|-----------|-----------|-----------|---|-----------|-----------|-----------|---|-----------|-----------|-----------|
| H | 2.258488  | -5.569189 | 0.874053  | H | 6.184087  | -0.094351 | 0.951273  | O | 4.452566  | 1.660077  | -1.514900 |
| H | -0.772907 | -6.639945 | 1.608606  | H | 5.766900  | -3.260198 | 1.263833  | C | 4.881662  | -0.439303 | -2.651895 |
| H | -0.504311 | -2.225938 | -3.831400 | H | 1.933448  | -0.566167 | -3.883960 | O | 5.636759  | -1.666629 | -2.579833 |
| O | -5.214414 | -2.722928 | -1.995752 | O | 0.379286  | -5.215647 | -2.628827 | C | 4.981135  | 0.092638  | -4.072361 |
| C | -3.788788 | -2.954404 | -1.904205 | C | 1.168588  | -4.029477 | -2.377358 | O | 6.297729  | 0.584041  | -4.302021 |
| C | -3.583001 | -4.188106 | -1.011545 | C | 2.364264  | -4.461156 | -1.514408 | C | 4.797236  | 2.916789  | -2.065604 |
| C | -4.207013 | -3.952715 | 0.366229  | C | 1.858731  | -5.071012 | -0.204548 | C | 4.877574  | 3.952900  | -0.936848 |
| C | -5.667486 | -3.540617 | 0.234444  | C | 0.875337  | -6.203548 | -0.477050 | O | 5.813523  | 3.528063  | 0.054184  |
| C | -5.810008 | -2.381248 | -0.759772 | C | -0.213104 | -5.752815 | -1.461418 | C | 3.505314  | 4.165309  | -0.312708 |
| H | -3.310844 | -2.094924 | -1.423898 | H | 0.571838  | -3.309489 | -1.807539 | O | 3.657188  | 5.180712  | 0.666967  |
| H | -4.049861 | -5.065598 | -1.480737 | H | 2.961808  | -5.204320 | -2.061034 | C | 2.492027  | 4.521712  | -1.397896 |
| H | -3.658869 | -3.122028 | 0.836632  | H | 1.324995  | -4.279396 | 0.343317  | O | 1.194708  | 4.589101  | -0.796762 |
| H | -6.230624 | -4.393734 | -0.171985 | H | 1.427274  | -7.027103 | -0.954236 | C | 2.491608  | 3.453394  | -2.496685 |
| H | -6.866882 | -2.195505 | -0.980990 | H | -0.801231 | -6.613892 | -1.797973 | O | 3.836558  | 3.324354  | -3.015370 |
| C | -3.234854 | -3.049916 | -3.337517 | C | 1.497664  | -3.386625 | -3.736100 | C | 1.554244  | 3.774144  | -3.669385 |
| O | -4.165117 | -5.109595 | 1.180316  | O | 2.910355  | -5.603929 | 0.582025  | O | 1.511084  | 5.147003  | -4.010824 |
| O | -6.215826 | -3.142896 | 1.486648  | O | 0.252153  | -6.659160 | 0.718567  | H | 1.447103  | 6.632855  | -0.636784 |
| O | -5.214944 | -1.238218 | -0.197912 | O | -1.035717 | -4.811249 | -0.822651 | H | -0.272491 | 6.917193  | 1.074186  |
| H | -2.692446 | -3.986474 | -3.479824 | H | 2.575908  | -3.266895 | -3.856505 | H | 0.652267  | 5.198794  | 2.616770  |
| O | -2.307390 | -2.012405 | -3.637210 | O | 0.942434  | -2.082636 | -3.870745 | H | -0.760228 | 3.930398  | 0.789371  |
| H | -4.086416 | -3.034819 | -4.030704 | H | 1.133835  | -4.057376 | -4.525445 | H | 4.725558  | 2.257659  | 2.257659  |
| H | -3.238192 | -5.410460 | 1.231557  | H | 3.596493  | -4.916643 | 0.676261  | H | -2.626650 | 6.217640  | 0.036013  |
| H | -5.940913 | -3.819622 | 2.123542  | H | 0.956552  | -6.725460 | 1.380387  | H | -1.017255 | 4.258385  | -1.686805 |
| H | -2.753952 | -1.141845 | -3.549760 | H | -0.037520 | -2.139691 | -3.834435 | H | -2.504696 | 6.715455  | -2.657582 |
| O | -5.835368 | 2.224979  | -1.276270 | O | -4.418609 | -3.852451 | -1.920140 | H | -3.192939 | 5.064819  | -2.701183 |
| C | -5.127706 | 0.963525  | -1.290519 | C | -2.978117 | -3.721202 | -1.868979 | H | -1.903421 | 5.729580  | -4.642732 |
| C | -5.872548 | 0.021177  | -0.332999 | C | -2.447920 | -4.884267 | -1.016052 | H | -4.641223 | 5.563911  | -0.262010 |
| C | -5.896243 | 0.621744  | 1.074776  | C | -3.055038 | -4.814465 | 0.387373  | H | -6.201670 | 4.309661  | 1.120878  |
| C | -6.471116 | 2.033393  | 1.048980  | C | -4.576613 | -4.764638 | 0.314081  | H | -4.846283 | 4.098106  | 3.045663  |
| C | -5.776897 | 2.882739  | -0.024019 | C | -5.043868 | -3.678345 | -0.664253 | H | -4.067508 | 2.146189  | 1.333395  |
| H | -4.112229 | 1.115942  | -0.909565 | H | -2.717672 | -2.781997 | -1.371475 | H | -5.906354 | 1.151116  | 2.455720  |
| H | -6.902299 | -0.125926 | -0.687740 | H | -2.716787 | -5.840474 | -1.486639 | H | -6.753833 | 2.061141  | -0.111203 |
| H | -4.853495 | 0.682640  | 1.424489  | H | -2.699423 | -3.882574 | 0.853891  | H | -3.919873 | 2.180789  | -1.243422 |
| H | -7.534094 | 1.963400  | 0.774226  | H | -4.928972 | -5.730076 | -0.078560 | H | -4.929146 | 1.098079  | -2.967139 |
| H | -6.308497 | 3.830765  | -0.162781 | H | -6.118840 | -3.775217 | -0.852965 | H | -5.489071 | 2.733244  | -3.335283 |
| C | -5.011022 | 0.500100  | -2.753967 | C | -2.461747 | -3.640977 | -3.316335 | H | -6.932286 | 0.565144  | -2.339920 |
| O | -6.685758 | -0.139347 | 1.970337  | O | -2.710347 | -5.937104 | 1.177960  | H | -7.486647 | 0.118391  | 0.011885  |
| O | -6.330894 | 2.682066  | 2.307837  | O | -5.156160 | -4.515295 | 1.590420  | H | -7.332947 | -2.072741 | 1.105337  |
| O | -4.451227 | 3.111541  | 0.377118  | O | -4.752568 | -2.418617 | -0.113016 | H | -6.197014 | -1.313152 | 3.067358  |
| H | -5.431400 | -0.499449 | -2.877818 | H | -1.697712 | -4.398984 | -3.497067 | H | -4.323860 | -1.600419 | 1.138525  |
| O | -3.659290 | 0.412752  | -3.193183 | O | -1.847290 | -2.389831 | -3.610564 | H | -4.636521 | -3.921516 | 1.945654  |
| H | -5.586641 | 1.197028  | -3.376989 | H | -3.307513 | -3.834486 | -3.989098 | H | -5.913594 | -3.731110 | -0.348942 |
| H | -6.385939 | -1.066582 | 1.925584  | H | -1.738371 | -6.019260 | 1.176954  | H | -4.496035 | -1.287648 | -1.508069 |
| H | -6.629971 | 2.043297  | 2.972046  | H | -4.696113 | -5.101607 | 2.209832  | H | -4.527653 | -3.056184 | -3.076157 |
| H | -3.256936 | 1.310128  | -3.180150 | H | -2.512186 | -1.673545 | -3.507946 | H | -5.783284 | -1.882871 | -3.557664 |
| O | -2.302830 | 5.769739  | -0.995658 | O | -6.312388 | 0.762693  | -1.118833 | H | -6.505400 | -4.143561 | -3.550060 |
| C | -2.830140 | 4.422398  | -0.945403 | C | -5.301279 | -0.270739 | -1.179572 | H | -4.681996 | -5.261112 | -1.166130 |
| C | -3.882331 | 4.404464  | 0.174668  | C | -5.729008 | -1.381130 | -0.207236 | H | -3.066476 | -6.755583 | -0.081999 |
| C | -3.218684 | 4.768827  | 1.505182  | C | -5.857633 | -0.813816 | -1.208668 | H | -3.345141 | -5.996234 | 2.143426  |
| C | -2.495550 | 6.106266  | 1.392946  | C | -6.783726 | 0.396935  | 1.223180  | H | -1.707354 | -4.222754 | 0.918085  |

|   |           |           |           |   |           |           |           |   |           |           |           |
|---|-----------|-----------|-----------|---|-----------|-----------|-----------|---|-----------|-----------|-----------|
| C | -1.578362 | 6.134832  | 0.162735  | C | -6.372498 | 1.404664  | 0.141753  | H | -0.303186 | -5.743594 | 1.863284  |
| H | -2.026856 | 3.725237  | -0.682793 | H | -1.522125 | 0.815681  | -1.145869 | H | -0.745794 | -6.282221 | -1.129850 |
| H | -4.673475 | 5.132283  | -0.054652 | H | -6.694983 | -1.798044 | -0.525182 | H | -1.607818 | -3.381249 | -1.510084 |
| H | -2.475043 | 3.987461  | 1.727479  | H | -4.855429 | -0.482020 | 1.522409  | H | -0.046463 | -3.715822 | -3.188985 |
| H | -3.255808 | 6.888709  | 1.250230  | H | -7.800498 | 0.053151  | 0.982164  | H | -1.579407 | -4.172030 | -3.944185 |
| H | -1.224235 | 7.155469  | -0.020992 | H | -7.131638 | 2.188160  | 0.039893  | H | 0.648593  | -5.663867 | -3.532433 |
| C | -3.319636 | 4.060469  | -2.358910 | C | -5.122633 | -0.681082 | -2.652812 | H | 1.104855  | -6.642027 | -0.189727 |
| O | -4.158157 | 4.888122  | 2.558399  | O | -6.384681 | -1.759556 | 2.121087  | H | 3.102177  | -6.048060 | 1.016413  |
| O | -1.716866 | 6.385953  | 2.550951  | O | -6.773782 | 1.050646  | 2.487667  | H | 2.067812  | -4.684259 | 2.726759  |
| O | -0.495606 | 5.269853  | 0.387332  | O | -5.132333 | 1.958229  | 0.500262  | H | 2.415351  | -3.116324 | 0.603546  |
| H | -4.366017 | 3.751599  | -2.340170 | H | -5.288571 | -1.752269 | -2.780866 | H | 4.624363  | -3.051223 | 1.537597  |
| O | -2.599375 | 2.969680  | -2.924065 | O | -3.805361 | -0.430565 | -3.132581 | H | 4.714610  | -4.620018 | -0.694262 |
| H | -3.235040 | 4.957648  | -2.985959 | H | -5.871002 | -0.141341 | -3.247940 | H | 2.071743  | -3.650323 | -1.904870 |
| H | -4.701747 | 4.078740  | 2.570244  | H | -5.850421 | -2.573417 | 2.055865  | H | 4.131986  | -5.459376 | -3.204000 |
| H | -2.288747 | 6.197579  | 3.309908  | H | -6.863520 | 0.349648  | 3.150477  | H | 4.073530  | -3.690203 | -3.459206 |
| H | -1.653457 | 3.221924  | -3.019957 | H | -3.627546 | 0.535363  | -3.094506 | H | 2.739960  | -5.021974 | -4.978823 |
| O | 2.672184  | 5.370528  | -1.489202 | O | -3.747813 | 5.089053  | -0.856343 | H | 6.175642  | -3.219619 | -1.419745 |
| C | 1.328373  | 4.898962  | -1.230754 | C | -3.922327 | 3.652775  | -0.818069 | H | 7.237302  | -1.179430 | -0.554914 |
| C | 0.807316  | 5.685599  | -0.017744 | C | -4.915912 | 3.356535  | 0.316111  | H | 6.402748  | -1.333007 | 1.652214  |
| C | 1.712047  | 5.427679  | 1.189745  | C | -4.341457 | 3.861399  | 1.642383  | H | 4.409374  | -0.259410 | 0.101595  |
| C | 3.162253  | 5.751287  | 0.849974  | C | -3.979011 | 5.338954  | 1.539433  | H | 5.863649  | 1.696048  | 0.572745  |
| C | 3.586790  | 5.063745  | -0.454803 | C | -3.118311 | 5.611072  | 0.298122  | H | 6.373239  | 0.936108  | -1.890866 |
| H | 1.360268  | 3.835950  | -0.969118 | H | -2.965080 | 3.178017  | -0.577089 | H | 3.825661  | -0.655483 | -2.445450 |
| H | 0.805206  | 6.759419  | -0.252629 | H | -5.869758 | 3.862242  | 0.109717  | H | 4.234647  | 0.890400  | -4.182967 |
| H | 1.641605  | 4.354950  | 1.429895  | H | -3.421375 | 3.289928  | 1.841783  | H | 4.729093  | -0.723346 | -4.765381 |
| H | 3.236544  | 6.836621  | 0.686112  | H | -4.913594 | 5.906658  | 1.417137  | H | 6.304557  | 1.021891  | -5.161944 |
| H | 4.553455  | 5.454612  | -0.791592 | H | -3.035874 | 6.689950  | 0.124988  | H | 5.743827  | 2.845754  | -2.610303 |
| C | 0.526365  | 5.036317  | -2.537735 | C | -4.333634 | 3.192020  | -2.227753 | H | 5.214310  | 4.902328  | -1.377219 |
| O | 1.355650  | 6.220079  | 2.307477  | O | -5.260919 | 3.729926  | 2.711547  | H | 5.638985  | 4.106451  | 0.814933  |
| O | 4.050086  | 5.351333  | 1.888417  | O | -3.277857 | 5.793173  | 2.691481  | H | 3.185539  | 3.223113  | 0.155661  |
| H | -0.365251 | 5.646098  | -2.382849 | H | -5.273459 | 2.638077  | -2.195313 | H | 2.843039  | 5.205941  | 1.207550  |
| O | 0.062564  | 3.784182  | -3.030976 | O | -3.380997 | 2.312411  | -2.816681 | H | 2.742853  | 5.481762  | -1.861410 |
| H | 1.166298  | 5.540101  | -3.274047 | H | -4.481447 | 4.086916  | -2.846379 | H | 2.190586  | 2.487594  | -2.069281 |
| H | 0.402320  | 6.097004  | 2.473140  | H | -5.577893 | 2.807669  | 2.725750  | H | 0.553967  | 3.402414  | -3.421046 |
| H | 3.657724  | 5.672069  | 2.714122  | H | -3.770336 | 5.455581  | 3.454424  | H | 1.914663  | 3.196761  | -4.531675 |
| H | 0.832390  | 3.210070  | -3.241049 | H | -2.525009 | 2.785462  | -2.921893 | H | 0.624970  | 5.471269  | -3.780676 |
| C | 4.966344  | -0.637088 | 3.792875  | C | -0.065977 | -4.227559 | 5.217391  | C | 2.691403  | 3.683044  | 4.638051  |
| C | 4.375984  | 0.596279  | 3.522551  | C | -0.980218 | -3.177254 | 5.158443  | C | 1.299134  | 3.689283  | 4.728325  |
| C | 3.045692  | 0.640561  | 3.107804  | C | -0.717815 | -2.086975 | 4.332004  | C | 0.573435  | 2.613440  | 4.216866  |
| C | 2.279967  | -0.523439 | 2.951813  | C | 0.442295  | -2.016098 | 3.547253  | C | 1.208568  | 1.518653  | 3.613095  |
| C | 2.873755  | -1.766599 | 3.244998  | C | 1.375521  | -3.067234 | 3.626712  | C | 2.613830  | 1.506004  | 3.541161  |
| C | 4.210892  | -1.801025 | 3.660271  | C | 1.103058  | -4.157764 | 4.462350  | C | 3.333567  | 2.591974  | 4.055189  |
| C | 2.052444  | -3.042139 | 3.236125  | C | 2.708906  | -2.986214 | 2.908965  | C | 3.346859  | 0.294280  | 3.000834  |
| C | 0.927621  | -2.923558 | 4.237219  | C | 3.472086  | -1.768743 | 3.370695  | C | 3.017530  | -0.924634 | 3.829307  |
| C | 0.917056  | -3.637024 | 5.434616  | C | 4.610911  | -1.854850 | 4.170526  | C | 3.941030  | -1.518580 | 4.688391  |
| C | -0.130834 | -3.501368 | 6.348684  | C | 5.300455  | -0.707952 | 4.572728  | C | 3.614715  | -2.657417 | 5.428222  |
| C | -1.177776 | -2.629108 | 6.061285  | C | 4.834725  | 0.542610  | 4.174177  | C | 2.336868  | -3.201136 | 5.315131  |
| C | -1.176130 | -1.895410 | 4.873271  | C | 3.687295  | 0.648271  | 3.384237  | C | 1.391334  | -2.608198 | 4.473674  |
| C | -0.129318 | -2.031346 | 3.949939  | C | 2.993557  | -0.499917 | 2.974894  | C | 1.717667  | -1.467708 | 3.722876  |
| C | 0.873560  | -0.334972 | 2.391462  | C | 0.538488  | -0.822859 | 2.598794  | C | 0.297127  | 0.472625  | 2.977766  |



|            |                |           |           |            |                |           |           |            |                |           |           |
|------------|----------------|-----------|-----------|------------|----------------|-----------|-----------|------------|----------------|-----------|-----------|
| N          | -0.128357      | -1.383787 | 2.686271  | N          | 1.880215       | -0.458080 | 2.092026  | N          | 0.831543       | -0.892332 | 2.778529  |
| C          | 0.948650       | -0.167621 | 0.856573  | C          | -0.383011      | -1.079479 | 1.384808  | C          | -0.167617      | 1.004656  | 1.606231  |
| C          | -1.431952      | -0.993533 | 2.150619  | C          | 1.802627       | 0.710062  | 1.212698  | C          | -0.204234      | -1.763845 | 2.222650  |
| C          | -1.348536      | -0.813872 | 0.638073  | C          | 0.879132       | 0.431296  | 0.032941  | C          | -0.661647      | -1.231885 | 0.868331  |
| N          | -0.348574      | 0.189052  | 0.293595  | N          | -0.452024      | 0.081758  | 0.507274  | N          | -1.160716      | 0.133352  | 0.988672  |
| C          | -0.276052      | 0.406799  | -1.147428 | C          | -1.379869      | -0.120138 | -0.596025 | C          | -1.592276      | 0.657779  | -0.297758 |
| H          | 5.999778       | -0.695855 | 4.122647  | H          | -0.251367      | -5.085366 | 5.857273  | H          | 3.273022       | 4.511202  | 5.032043  |
| H          | 4.944330       | 1.516727  | 3.614116  | H          | -1.887778      | -3.200793 | 5.754396  | H          | 0.779462       | 4.515257  | 5.206231  |
| H          | 2.586763       | 1.603931  | 2.897216  | H          | -1.430504      | -1.266379 | 4.290659  | H          | -0.511778      | 2.627473  | 4.279888  |
| H          | 4.661198       | -2.761867 | 3.894819  | H          | 1.833646       | -4.960373 | 4.526280  | H          | 4.419021       | 2.570652  | 4.002410  |
| H          | 2.691454       | -3.895461 | 3.480786  | H          | 3.283637       | -3.896665 | 3.098473  | H          | 4.423488       | 0.481855  | 2.984221  |
| H          | 1.630294       | -3.217423 | 2.239524  | H          | 2.554481       | -2.907588 | 1.827170  | H          | 3.031294       | 0.103575  | 1.967524  |
| H          | 1.735011       | -4.321246 | 5.646678  | H          | 4.968616       | -2.835929 | 4.474313  | H          | 4.937885       | -1.091065 | 4.765910  |
| H          | -0.127806      | -4.073983 | 7.271212  | H          | 6.191627       | -0.794192 | 5.186861  | H          | 4.351672       | -3.114057 | 6.081534  |
| H          | -1.998545      | -2.508941 | 6.762798  | H          | 5.354422       | 1.444754  | 4.485184  | H          | 2.062671       | -4.079542 | 5.892942  |
| H          | -1.992328      | -1.210719 | 4.669660  | H          | 3.331637       | 1.630697  | 3.093486  | H          | 0.392793       | -3.027925 | 4.413380  |
| H          | 0.498455       | 0.624990  | 2.790584  | H          | 0.117163       | 0.048809  | 3.132226  | H          | -0.604369      | 0.402758  | 3.613098  |
| H          | 1.347851       | -1.108321 | 0.426323  | H          | -0.020142      | -1.984884 | 0.857757  | H          | 0.727734       | 1.138901  | 0.966887  |
| H          | 1.659547       | 0.631350  | 0.622118  | H          | -1.390662      | -1.298292 | 1.752385  | H          | -0.618705      | 1.990687  | 1.751192  |
| H          | -1.799601      | -0.053675 | 2.600973  | H          | 1.434510       | 1.606641  | 1.742994  | H          | -1.080224      | -1.840820 | 2.891795  |
| H          | -2.151344      | -1.783557 | 2.381921  | H          | 2.806966       | 0.916381  | 0.837566  | H          | 0.214117       | -2.763526 | 2.086158  |
| H          | -2.324756      | -0.487106 | 0.261911  | H          | 0.811408       | 1.322534  | -0.601842 | H          | -1.470863      | -1.863192 | 0.483476  |
| H          | -1.126905      | -1.796478 | 0.176929  | H          | 1.313593       | -0.379243 | -0.584934 | H          | 0.185280       | -1.298308 | 0.156855  |
| H          | 0.021049       | -0.498416 | -1.709003 | H          | -1.044824      | -0.888453 | -1.317015 | H          | -0.780566      | 0.675811  | -1.051584 |
| H          | 0.447876       | 1.195120  | -1.374631 | H          | -2.350162      | -0.433657 | -0.202082 | H          | -1.960571      | 1.680298  | -0.175333 |
| H          | -1.252792      | 0.729149  | -1.520856 | H          | -4.349708      | 0.144693  | -0.836192 | H          | -2.409029      | 0.043446  | -0.690198 |
| <b>FA1</b> |                |           |           | <b>FA1</b> |                |           |           | <b>FA1</b> |                |           |           |
| E          | -5082.91365921 |           |           | E          | -5082.91033493 |           |           | E          | -5082.88073010 |           |           |
| ZPE        | -5081.342391   |           |           | ZPE        | -5081.339071   |           |           | ZPE        | -5081.314502   |           |           |
| H          | -5081.252669   |           |           | H          | -5081.249309   |           |           | H          | -5081.221695   |           |           |
| G          | -5081.463601   |           |           | G          | -5081.460270   |           |           | G          | -5081.442998   |           |           |
| S          | 443.943        |           |           | S          | 444.004        |           |           | S          | 465.771        |           |           |
| O          | -5.298169      | 3.675275  | -0.776232 | O          | -5.565184      | 1.849532  | -2.332049 | C          | -1.888865      | 6.067414  | -0.805124 |
| C          | -5.011304      | 2.256589  | -0.806630 | C          | -5.017879      | 0.586469  | -1.885044 | C          | -2.582452      | 6.142363  | 0.556812  |
| C          | -5.804360      | 1.617971  | 0.344618  | C          | -5.892097      | 0.104125  | -0.716821 | O          | -1.619796      | 6.439014  | 1.563907  |
| C          | -5.371114      | 2.233840  | 1.677099  | C          | -5.888638      | 1.145297  | 0.405790  | C          | -3.302806      | 4.836193  | 0.865061  |
| C          | -5.501021      | 3.751056  | 1.633407  | C          | -6.298298      | 2.512752  | -0.125943 | O          | -3.982803      | 5.035013  | 2.088606  |
| C          | -4.816972      | 4.321985  | 0.384441  | C          | -5.466384      | 2.874484  | -1.362959 | C          | -4.242266      | 4.438048  | -0.278666 |
| H          | -3.942325      | 2.097839  | -0.626827 | H          | -3.999491      | 0.742376  | -1.513253 | O          | -4.665216      | 3.100772  | -0.001818 |
| H          | -6.878692      | 1.792269  | 0.190540  | H          | -6.921429      | -0.058164 | -1.066580 | C          | -3.499234      | 4.485833  | -1.626035 |
| H          | -4.309977      | 1.980244  | 1.827159  | H          | -4.857625      | 1.217650  | 0.784413  | O          | -2.862550      | 5.768032  | -1.793519 |
| H          | -6.570619      | 3.998327  | 1.562479  | H          | -7.351554      | 2.460597  | -0.438864 | C          | -4.391892      | 4.293885  | -2.836683 |
| H          | -5.074544      | 5.379990  | 0.261791  | H          | -5.861875      | 3.777399  | -1.841832 | O          | -3.535621      | 4.125576  | -3.963311 |
| C          | -5.325830      | 1.747387  | -2.225013 | C          | -4.927275      | -0.344864 | -3.107290 | C          | -6.039358      | 2.787195  | 0.060249  |
| O          | -5.547668      | 0.221437  | 0.476103  | O          | -5.379435      | -1.086816 | -0.122995 | C          | -6.346712      | 2.139731  | 1.418161  |
| O          | -6.158511      | 1.776254  | 2.761501  | O          | -6.786083      | 0.810355  | 1.449600  | O          | -5.956410      | 3.013914  | 2.474478  |
| O          | -4.933368      | 4.362348  | 2.787346  | O          | -6.128989      | 3.530948  | 0.855437  | C          | -5.646743      | 0.792454  | 1.540005  |
| O          | -3.427430      | 4.165525  | 0.522352  | O          | -4.137051      | 3.068565  | -0.955744 | O          | -6.058323      | 0.231059  | 2.773559  |
| H          | -6.028177      | 0.912801  | -2.190243 | H          | -5.443712      | -1.286761 | -2.913399 | C          | -6.011651      | -0.077634 | 0.341807  |
| O          | -4.172531      | 1.258381  | -2.899407 | O          | -3.585474      | -0.692520 | -3.430484 | O          | -5.252618      | -1.287046 | 0.439503  |

|   |           |           |           |   |           |           |           |   |           |           |           |
|---|-----------|-----------|-----------|---|-----------|-----------|-----------|---|-----------|-----------|-----------|
| H | -5.793680 | 2.569974  | -2.782149 | H | -5.423335 | 0.154097  | -3.950348 | C | -5.694239 | 0.647658  | -0.969985 |
| H | -6.167922 | 0.801108  | 2.737437  | H | -6.567303 | -0.089607 | 1.755612  | O | -6.407697 | 1.906539  | -0.981390 |
| H | -5.261730 | 3.855817  | 3.545252  | H | -6.497401 | 3.171028  | 1.676205  | C | -6.094681 | -0.150417 | -2.222232 |
| H | -3.517080 | 1.985195  | -2.987308 | H | -3.086709 | 0.123131  | -3.659391 | O | -7.251532 | -0.952574 | -2.072811 |
| O | -0.957616 | 6.113895  | -1.391755 | O | -1.587238 | 4.882449  | -2.893454 | C | -5.951221 | -2.496519 | 0.585040  |
| C | -1.788294 | 4.952804  | -1.150830 | C | -2.319975 | 3.698944  | -2.496252 | C | -5.286172 | -3.332539 | 1.678981  |
| C | -2.578293 | 5.243100  | 0.135865  | C | -3.391877 | 4.157004  | -1.495508 | O | -5.290457 | -2.585864 | 2.892728  |
| C | -1.596157 | 5.427393  | 1.295641  | C | -2.724707 | 4.815369  | -0.286213 | C | -3.871310 | -3.728059 | 1.274775  |
| C | -0.594381 | 6.529680  | 0.968349  | C | -1.795938 | 5.938732  | -0.728235 | O | -3.374548 | -4.569559 | 2.301764  |
| C | 0.042323  | 6.301262  | -0.409491 | C | -0.847148 | 5.468922  | -1.841318 | C | -4.412815 | -4.412815 | -0.091151 |
| H | -1.150140 | 4.078701  | -0.980859 | H | -1.641937 | 3.003129  | -1.989932 | O | -2.528761 | -4.542534 | -0.499692 |
| H | -3.170044 | 6.159332  | -0.000468 | H | -4.067164 | 4.874639  | -1.982927 | C | -4.656723 | -3.573030 | -1.130538 |
| H | -1.053432 | 4.477033  | 1.413605  | H | -2.126153 | 4.043965  | 0.221142  | O | -5.970699 | -3.226168 | -0.635380 |
| H | -1.145006 | 7.480967  | 0.921684  | H | -2.414522 | 6.744814  | -1.149312 | C | -4.830393 | -4.288490 | -2.460258 |
| H | 0.600242  | 7.190720  | -0.722366 | H | -0.333687 | 6.328893  | -2.285993 | O | -5.370426 | -5.584465 | -2.228061 |
| C | -2.604584 | 4.682104  | -2.428322 | C | -2.827249 | 3.008147  | -3.775570 | C | -2.090902 | -5.767359 | -1.059151 |
| O | -2.237839 | 5.788032  | 2.505675  | O | -3.677155 | 5.376467  | 0.604429  | C | -1.049652 | -6.396717 | -0.125318 |
| O | 0.442062  | 6.611467  | 1.941050  | O | -1.017197 | 6.438632  | 0.355680  | O | -1.610652 | -6.551215 | 1.178487  |
| O | 0.893649  | 5.188801  | -0.324748 | O | 0.083054  | 4.568748  | -1.295839 | C | 0.208423  | -5.540469 | -0.074350 |
| H | -3.675692 | 4.715647  | -2.221340 | H | -3.905852 | 2.849255  | -3.727303 | O | 1.136412  | -6.235965 | 0.743543  |
| O | -2.350946 | 3.390651  | -2.969863 | O | -2.251771 | 1.721963  | -3.968627 | C | 0.721493  | -5.288263 | -1.488315 |
| H | -2.367416 | 5.471796  | -3.153330 | H | -2.613316 | 3.671391  | -4.624278 | O | 1.843631  | -4.403669 | -1.379112 |
| H | -2.986343 | 5.177736  | 2.646531  | H | -4.353981 | 4.696298  | 0.784781  | C | -0.384423 | -4.662843 | -2.346707 |
| H | 0.003437  | 6.605578  | 2.804555  | H | -1.639813 | 6.630415  | 1.072208  | O | -1.524811 | -5.556656 | -2.333994 |
| H | -1.408375 | 3.330938  | -3.240836 | H | -1.278496 | 1.819105  | -4.070529 | C | 0.025438  | -4.423575 | -3.810708 |
| O | 3.545279  | 4.190854  | -2.666404 | O | 3.275548  | 3.758972  | -2.932336 | O | 0.979346  | -5.348176 | -4.307022 |
| C | 2.196860  | 4.204586  | -2.144109 | C | 1.878866  | 3.525601  | -2.644509 | C | 3.089238  | -4.849576 | -1.843786 |
| C | 2.151461  | 5.228850  | -1.000322 | C | 1.450251  | 4.660212  | -1.704722 | C | 4.162433  | -4.544635 | -0.799207 |
| C | 3.195033  | 4.892582  | 0.066726  | C | 2.256077  | 4.601683  | -0.398647 | O | 3.818423  | -5.166881 | 0.436435  |
| C | 4.575656  | 4.716624  | -0.548804 | C | 3.759857  | 4.582775  | -0.671812 | C | 4.330935  | -3.042468 | -0.613407 |
| C | 4.502277  | 3.740195  | -1.729397 | C | 4.104721  | 3.587609  | -1.801771 | O | 5.402613  | -2.878622 | 0.295104  |
| H | 1.955285  | 3.218449  | -1.733778 | H | 1.768616  | 2.568465  | -2.122713 | C | 4.568658  | -2.334748 | -1.953755 |
| H | 2.340109  | 6.237234  | -1.394186 | H | 1.629363  | 5.624803  | -2.199939 | O | 4.429590  | -0.928731 | -1.740069 |
| H | 2.905482  | 3.931918  | 0.516278  | H | 1.979524  | 3.657558  | 0.100548  | C | 3.514244  | -2.775456 | -2.985054 |
| H | 4.914601  | 5.687055  | -0.940057 | H | 4.034644  | 5.584536  | -1.030477 | O | 3.450651  | -4.213696 | -3.060191 |
| H | 5.457512  | 3.710276  | -2.265230 | H | 5.123992  | 3.777355  | -2.156179 | C | 3.793878  | -2.292075 | -4.394553 |
| C | 1.241109  | 4.467763  | -3.320845 | C | 1.135747  | 3.404223  | -3.987767 | O | 2.616801  | -2.531078 | -5.161504 |
| O | 3.293134  | 5.899353  | 1.058653  | O | 1.961203  | 5.714086  | 0.426110  | C | 5.567735  | -0.090432 | -1.797167 |
| O | 5.507519  | 4.216654  | 0.404135  | O | 4.556298  | 4.278354  | 0.463585  | C | 5.688117  | 0.708276  | -0.484710 |
| O | 4.173484  | 2.468039  | -1.229302 | O | 3.998153  | 2.279574  | -1.295258 | O | 5.763156  | -0.214701 | 0.585297  |
| H | 0.573418  | 5.300808  | -3.092221 | H | 0.344456  | 4.151183  | -4.067766 | C | 4.525796  | 1.691849  | -0.346676 |
| O | 0.400092  | 3.355768  | -3.602375 | O | 0.498159  | 2.141154  | -4.144311 | O | 4.771891  | 2.515512  | 0.785828  |
| H | 1.847465  | 4.741369  | -4.194679 | H | 1.863492  | 3.583351  | -4.790155 | C | 4.382303  | 2.530260  | -1.616919 |
| H | 2.414232  | 6.004371  | 1.467718  | H | 0.990985  | 5.809560  | 0.459231  | O | 3.157323  | 3.259609  | -1.475744 |
| H | 5.366945  | 4.737352  | 1.209562  | H | 4.016115  | 4.064435  | 1.264051  | C | 4.341790  | 1.652542  | -2.876634 |
| H | 0.961391  | 2.583406  | -3.835807 | H | 1.175607  | 1.429656  | -4.128492 | O | 5.487274  | 0.781511  | -2.902656 |
| O | 4.867557  | -0.616588 | -3.101095 | O | 5.539271  | -0.773705 | -2.631107 | C | 4.335600  | 2.460981  | -4.164299 |
| C | 4.028202  | 0.497934  | -2.724959 | C | 4.463721  | 0.174681  | -2.441501 | O | 5.389097  | 3.419730  | -4.127917 |
| C | 4.858926  | 1.320014  | -1.731477 | C | 5.023205  | 1.344876  | -1.621759 | C | 3.125527  | 4.620240  | -1.862061 |
| C | 5.161939  | 0.479720  | -0.483250 | C | 5.590443  | 0.851578  | -0.288661 | C | 2.822497  | 5.483633  | -0.629668 |

|   |           |           |           |   |           |           |           |   |           |           |           |
|---|-----------|-----------|-----------|---|-----------|-----------|-----------|---|-----------|-----------|-----------|
| C | 5.825128  | -0.847933 | -0.852670 | C | 6.597218  | -0.270682 | -0.515347 | O | 3.776145  | 5.198275  | 0.393767  |
| C | 5.081761  | -1.516848 | -2.031500 | C | 5.989218  | -1.350138 | -1.419674 | C | 1.403751  | 5.240435  | -0.131576 |
| H | 3.134250  | 0.123773  | -2.214177 | H | 3.657770  | -0.298193 | -1.870560 | O | 1.188735  | 6.146248  | 0.939876  |
| H | 5.800754  | 1.624746  | -2.208690 | H | 5.820940  | 1.839006  | -2.194176 | C | 0.413066  | 5.419360  | -1.277404 |
| H | 4.192957  | 0.258000  | -0.007288 | H | 4.751620  | 0.443495  | 0.296433  | O | -0.883441 | 5.090610  | -0.762297 |
| H | 6.842211  | -0.614445 | -1.202951 | H | 7.470053  | 0.147672  | -1.037674 | C | 0.794296  | 4.503307  | -2.446527 |
| H | 5.699063  | -2.322192 | -2.444672 | H | 6.746377  | -2.090022 | -1.702773 | O | 2.142992  | 4.839760  | -2.852358 |
| C | 3.551325  | 1.199151  | -4.010987 | C | 3.900337  | 0.538286  | -3.827553 | C | -0.127773 | 4.637017  | -3.670791 |
| O | 6.009050  | 1.188877  | 0.405563  | O | 6.248005  | 1.885932  | 0.423829  | O | -0.693575 | 5.927510  | -3.834570 |
| O | 5.885080  | -1.783229 | 0.210458  | O | 7.000134  | -0.876936 | 0.708674  | H | -1.476761 | 7.041010  | -1.087260 |
| O | 3.859065  | -2.024180 | -1.561054 | O | 4.936596  | -1.954971 | -0.716511 | H | -3.328028 | 6.948937  | 0.504648  |
| H | 3.853125  | 2.247521  | -4.025704 | H | 3.967423  | 1.614745  | -3.999159 | H | -2.053332 | 6.240279  | 2.408228  |
| O | 2.132306  | 1.200784  | -4.131711 | O | 2.523999  | 0.203923  | -3.960985 | H | -2.546989 | 4.041124  | 0.955160  |
| H | 4.021019  | 0.691682  | -4.863789 | H | 4.510257  | 0.029005  | -4.585451 | H | -4.526711 | 4.244355  | 2.278908  |
| H | 5.684032  | 2.107741  | 0.461679  | H | 5.660388  | 2.672291  | 0.437606  | H | -5.105104 | 5.118787  | -0.293351 |
| H | 5.770189  | -1.361672 | 1.105968  | H | 7.220062  | -0.148590 | 1.308003  | H | -2.737887 | 3.696797  | -1.624651 |
| H | 1.813248  | 0.273327  | -4.196009 | H | 2.420143  | -0.768407 | -3.865365 | H | -5.033945 | 5.180407  | -2.947460 |
| O | 1.822314  | -4.691762 | -3.050120 | O | 3.312025  | -5.148525 | -1.547091 | H | -5.032480 | 3.416474  | -2.676434 |
| C | 2.179431  | -3.315311 | -2.780362 | C | 3.496854  | -3.717074 | -1.641962 | H | -4.070324 | 4.167016  | -4.765415 |
| C | 3.470437  | -3.337503 | -1.951621 | C | 4.739155  | -3.364341 | -0.808927 | H | -6.646229 | 3.688377  | -0.081523 |
| C | 3.254762  | -4.118233 | -0.654839 | C | 4.548517  | -3.818354 | 0.640715  | H | -7.432077 | 1.970286  | 1.462627  |
| C | 2.701780  | -5.506664 | -0.949662 | C | 4.148906  | -5.285195 | 0.716512  | H | -5.969253 | 2.466872  | 3.275879  |
| C | 1.489591  | -5.422198 | -1.885700 | C | 2.991865  | -5.589249 | -0.244519 | H | -4.558868 | 0.958576  | 1.526903  |
| H | 1.387646  | -2.843882 | -2.188355 | H | 2.630720  | -3.208289 | -1.204685 | H | -5.640959 | -0.646747 | 2.872020  |
| H | 4.269412  | -3.812790 | -2.538281 | H | 5.628331  | -3.848234 | -1.236973 | H | -7.084000 | -0.302326 | 0.357349  |
| H | 2.507886  | -3.568163 | -0.061780 | H | 3.729989  | -3.216242 | 1.062200  | H | -4.618297 | 0.858255  | -1.021068 |
| H | 3.480154  | -6.081735 | -1.472130 | H | 5.008070  | -5.890534 | 0.391272  | H | -5.230637 | -0.753220 | -2.531827 |
| H | 1.206196  | -6.421702 | -2.234630 | H | 2.844834  | -6.671928 | -0.325283 | H | -6.292031 | 0.572561  | -3.020842 |
| C | 2.263929  | -2.573367 | -4.126620 | C | 3.542174  | -3.347714 | -3.135345 | H | -6.964240 | -1.815801 | -1.730389 |
| O | 4.457405  | -4.285864 | 0.075722  | O | 5.728287  | -3.658824 | 1.408935  | H | -7.002103 | -2.312593 | 0.830209  |
| O | 2.313914  | -6.183787 | 0.243942  | O | 3.756507  | -5.655408 | 2.033789  | H | -5.879732 | -4.249736 | 1.801104  |
| O | 0.430929  | -4.824288 | -1.183324 | O | 1.821078  | -4.972063 | 0.236317  | H | -4.682250 | -3.045321 | 3.491030  |
| H | 3.255598  | -2.136428 | -4.262788 | H | 4.416026  | -2.730697 | -3.351151 | H | -3.262911 | -2.815264 | 1.188896  |
| O | 1.343068  | -1.492764 | -4.214582 | O | 2.413575  | -2.584869 | -3.545357 | H | -2.646404 | -5.112266 | 1.938520  |
| H | 2.096830  | -3.305591 | -4.927879 | H | 3.625278  | -4.278674 | -3.711965 | H | -4.364740 | -5.395961 | 0.001557  |
| H | 4.900763  | -3.411327 | 0.146211  | H | 6.011709  | -2.729524 | 1.327536  | H | -4.087403 | -2.652242 | -1.310460 |
| H | 3.070003  | -6.118233 | 0.845665  | H | 4.432954  | -5.293974 | 2.625917  | H | -3.844741 | -4.347246 | -2.940725 |
| H | 0.430229  | -1.846236 | -4.130493 | H | 1.597245  | -3.116882 | -3.412062 | H | -5.494028 | -3.682504 | -3.095134 |
| O | -3.107677 | -4.979491 | -2.187028 | O | -1.532553 | -6.117680 | -0.789486 | H | -5.415252 | -6.044279 | -3.075412 |
| C | -1.791853 | -4.377627 | -2.150327 | C | -0.360406 | -5.277161 | -0.912388 | H | -2.941252 | -6.437550 | -1.216751 |
| C | -0.888160 | -5.336671 | -1.358951 | C | 0.602681  | -5.715340 | 0.204731  | H | -0.784731 | -7.382998 | -0.532116 |
| C | -1.443300 | -5.520295 | 0.056262  | C | -0.066369 | -5.472698 | 1.559677  | H | -0.870252 | -6.815098 | 1.746873  |
| C | -2.894766 | -5.982443 | 0.004374  | C | -1.389564 | -6.228324 | 1.625448  | H | -0.047532 | -4.568502 | 0.372727  |
| C | -3.717780 | -5.069098 | -0.914155 | C | -2.260599 | -5.901781 | 0.404450  | H | 1.987547  | -5.755994 | 0.736786  |
| H | -1.842404 | -3.423942 | -1.613978 | H | -0.643931 | -4.232171 | -0.745156 | H | 1.029205  | -6.228645 | -1.957660 |
| H | -0.850878 | -6.309283 | -1.870002 | H | 0.824712  | -6.785632 | 0.088605  | H | -0.692124 | -3.705866 | -1.906480 |
| H | -1.404235 | -4.543092 | 0.559962  | H | -0.276110 | -4.395339 | 1.642893  | H | 0.396855  | -3.398508 | -3.912281 |
| H | -2.916732 | -6.992406 | -0.431290 | H | -1.166457 | -7.305113 | 1.592006  | H | -0.886455 | -4.507244 | -4.414243 |
| H | -4.709884 | -5.499879 | -1.090090 | H | -3.114945 | -6.585981 | 0.354925  | H | 1.839905  | -4.899569 | -4.277725 |
| C | -1.375047 | -4.071897 | -3.601015 | C | 0.144842  | -5.391320 | -2.363020 | H | 3.060401  | -5.919317 | -2.072515 |

|   |           |           |           |   |           |           |           |   |           |           |           |
|---|-----------|-----------|-----------|---|-----------|-----------|-----------|---|-----------|-----------|-----------|
| O | -0.714061 | -6.490261 | 0.794000  | O | 0.728353  | -5.910245 | 2.649578  | H | 5.110733  | -4.958412 | -1.171739 |
| O | -3.497134 | -5.992747 | 1.294273  | O | -2.121469 | -5.918632 | 2.805890  | H | 4.418160  | -4.782671 | 1.094610  |
| O | -3.824093 | -3.809581 | -0.304830 | O | -2.695478 | -4.572352 | 0.509123  | H | 3.394217  | -2.639386 | -0.200389 |
| H | -0.426923 | -4.555594 | -3.842246 | H | 1.174533  | -5.750559 | -2.394739 | H | 5.530791  | -1.913000 | 0.449053  |
| O | -1.176008 | -2.681274 | -3.828198 | O | 0.147573  | -4.138505 | -3.037060 | H | 5.578923  | -2.571649 | -2.317315 |
| H | -2.149101 | -4.477130 | -4.266107 | H | -0.491775 | -6.119809 | -2.882207 | H | 2.541293  | -2.382608 | -2.666613 |
| H | 0.232925  | -6.263679 | 0.732524  | H | 1.649700  | -5.632235 | 2.488383  | H | 4.655276  | -2.847626 | -4.793141 |
| H | -2.873943 | -6.448178 | 1.879112  | H | -1.492687 | -5.983769 | 3.539600  | H | 4.053182  | -1.225637 | -4.363107 |
| H | -2.024979 | -2.207746 | -3.681746 | H | -0.772149 | -3.793615 | -3.076843 | H | 2.834602  | -2.443444 | -6.097264 |
| O | -6.306234 | -1.234038 | -1.176041 | O | -5.521534 | -3.082670 | -1.315343 | H | 6.472830  | -0.687470 | -1.954158 |
| C | -5.024128 | -1.896558 | -1.286565 | C | -4.123187 | -3.387958 | -1.102535 | H | 6.617113  | 1.294581  | -0.551373 |
| C | -5.070936 | -3.118510 | -0.355597 | C | -4.043460 | -4.266497 | 0.154964  | H | 5.705819  | 0.205520  | 1.489780  |
| C | -5.337159 | -2.666422 | 1.082557  | C | -4.631376 | -3.518110 | 1.354065  | H | 3.598544  | 1.115486  | -0.211044 |
| C | -6.596073 | -1.811432 | 1.154286  | C | -6.048472 | -3.049495 | 1.045398  | H | 4.323947  | 3.374820  | 0.650928  |
| C | -6.548670 | -0.691219 | 0.107082  | C | -6.082871 | -2.289350 | -0.286526 | H | 5.230848  | 3.218824  | -1.689763 |
| H | -4.234351 | -1.222934 | -0.936496 | H | -3.572188 | -2.459749 | -0.916853 | H | 3.425167  | 1.048400  | -2.854741 |
| H | -5.869075 | -3.800240 | -0.681868 | H | -4.609824 | -5.193496 | -0.012022 | H | 3.357334  | 2.951461  | -4.250536 |
| H | -4.481216 | -2.048972 | 1.396244  | H | -4.003703 | -2.631446 | 1.531671  | H | 4.456788  | 1.764702  | -5.006927 |
| H | -7.457888 | -2.450937 | 0.912241  | H | -6.686658 | -3.938725 | 0.934312  | H | 5.302987  | 3.982708  | -4.907038 |
| H | -7.521531 | -0.191530 | 0.038903  | H | -7.117435 | -2.096503 | -0.591905 | H | 4.076617  | 4.905391  | -2.321019 |
| C | -4.768909 | -2.175328 | -2.778824 | C | -3.573399 | -4.002174 | -2.403011 | H | 2.906811  | 6.538044  | -0.929018 |
| O | -5.519764 | -3.760535 | 1.963362  | O | -4.700064 | -4.329092 | 2.513414  | H | 3.437810  | 5.632162  | 1.192525  |
| O | -6.764526 | -1.229442 | 2.442624  | O | -6.559878 | -2.204972 | 2.070858  | H | 1.327224  | 4.200528  | 0.220375  |
| H | -4.556023 | -3.233019 | -2.943362 | H | -3.173529 | -5.001739 | -2.221325 | H | 0.246191  | 6.115473  | 1.198652  |
| O | -3.642658 | -1.466977 | -3.283108 | O | -2.501967 | -3.243102 | -2.951684 | H | 0.422721  | 6.454209  | -1.635477 |
| H | -5.681868 | -1.916475 | -3.331398 | H | -4.405915 | -4.087527 | -3.113847 | H | 0.785670  | 3.457886  | -2.112459 |
| H | -4.755399 | -4.357781 | 1.862519  | H | -3.806720 | -4.677976 | 2.691142  | H | -0.915585 | 3.879406  | -3.606624 |
| H | -6.606025 | -1.942733 | 3.078945  | H | -6.338879 | -2.640773 | 2.907605  | H | 0.481046  | 4.408341  | -4.553980 |
| H | -3.801242 | -0.500508 | -3.197893 | H | -2.829487 | -2.344746 | -3.179110 | H | -1.607538 | 5.870195  | -3.512395 |
| C | 0.389942  | 2.590540  | 3.677725  | C | 0.875649  | -2.174911 | 3.493351  | C | 0.128921  | 3.244855  | 4.474188  |
| C | 1.132180  | 2.491015  | 2.502291  | C | 1.456086  | -1.666403 | 2.332266  | C | 0.955690  | 3.430652  | 3.367110  |
| C | 1.979393  | 1.400090  | 2.316281  | C | 1.689421  | -0.296372 | 2.223891  | C | 1.907946  | 2.462419  | 3.056341  |
| C | 2.114420  | 0.393733  | 3.283885  | C | 1.349263  | 0.593763  | 3.252347  | C | 2.073029  | 1.306989  | 3.836796  |
| C | 1.344794  | 0.484659  | 4.460604  | C | 0.715176  | 0.084801  | 4.403832  | C | 1.227105  | 1.116603  | 4.944919  |
| C | 0.495488  | 1.584834  | 4.636171  | C | 0.498566  | -1.295046 | 4.506271  | C | 0.264253  | 2.090619  | 5.241239  |
| C | 1.327890  | -0.640436 | 5.479653  | C | 0.153160  | 1.011072  | 5.468481  | C | 1.275662  | -0.155130 | 5.770073  |
| C | 0.871589  | -1.918070 | 4.816388  | C | -0.842137 | 1.957557  | 4.838440  | C | 1.065944  | -1.365427 | 4.893401  |
| C | -0.383255 | -2.479489 | 5.047375  | C | -2.218297 | 1.850851  | 5.035374  | C | -0.116037 | -2.105736 | 4.910616  |
| C | -0.778928 | -3.650321 | 4.395904  | C | -3.105521 | 2.728605  | 4.406678  | C | -0.277152 | -3.231063 | 4.098433  |
| C | 0.090349  | -4.263048 | 3.495748  | C | -2.609779 | 3.719794  | 3.561830  | C | 0.768232  | -3.622582 | 3.264867  |
| C | 1.347643  | -3.706563 | 3.246372  | C | -1.234043 | 3.834257  | 3.348369  | C | 1.947821  | -2.876028 | 3.215411  |
| C | 1.749281  | -2.532511 | 3.898631  | C | -0.341453 | 2.959332  | 3.981493  | C | 2.104644  | -1.733246 | 4.013083  |
| C | 3.159681  | -0.686875 | 2.994216  | C | 1.775736  | 2.049766  | 3.055089  | C | 3.240470  | 0.399464  | 3.434165  |
| N | 3.043066  | -1.956291 | 3.744425  | N | 1.072871  | 3.067747  | 3.860124  | N | 3.300677  | -0.954137 | 4.039558  |
| C | 4.560199  | -0.089636 | 3.258392  | C | 3.287646  | 2.157274  | 3.349871  | C | 4.547513  | 1.149917  | 3.766538  |
| C | 4.106681  | -2.888000 | 3.364261  | C | 1.583267  | 4.410427  | 3.572559  | C | 4.500367  | -1.672165 | 3.598563  |
| C | 5.475979  | -2.279911 | 3.643474  | C | 3.070772  | 4.493764  | 3.888282  | C | 5.770916  | -0.898296 | 3.930606  |
| N | 5.640649  | -1.021751 | 2.904179  | N | 3.818497  | 3.505065  | 3.099942  | N | 5.731984  | 0.422855  | 3.292957  |
| C | 6.956087  | -0.421575 | 3.153949  | C | 5.251430  | 3.557981  | 3.413746  | C | 6.956739  | 1.188939  | 3.532188  |
| H | -0.279829 | 3.431769  | 3.835015  | H | 0.705381  | -3.242749 | 3.600213  | H | -0.621785 | 3.985825  | 4.734282  |

|            |                |           |           |            |                |           |           |            |                |           |           |
|------------|----------------|-----------|-----------|------------|----------------|-----------|-----------|------------|----------------|-----------|-----------|
| H          | 1.047929       | 3.252722  | 1.733606  | H          | 1.709535       | -2.331485 | 1.512759  | H          | 0.873824       | 4.323666  | 2.754776  |
| H          | 2.551791       | 1.327493  | 1.394363  | H          | 2.142483       | 0.096810  | 1.316251  | H          | 2.556026       | 2.608405  | 2.195967  |
| H          | -0.101727      | 1.641246  | 5.542796  | H          | 0.010020       | -1.680069 | 5.397881  | H          | -0.391259      | 1.931250  | 6.093835  |
| H          | 0.659372       | -0.378438 | 6.304786  | H          | -0.325645      | 0.419138  | 6.253842  | H          | 0.508659       | -0.114251 | 6.549009  |
| H          | 2.331667       | -0.794773 | 5.893547  | H          | 0.957277       | 1.597700  | 5.928772  | H          | 2.250890       | -0.244511 | 6.264359  |
| H          | -1.054257      | -1.999283 | 5.755381  | H          | -2.599120      | 1.076960  | 5.697337  | H          | -0.915651      | -1.802941 | 5.582484  |
| H          | -1.757733      | -4.077732 | 4.592807  | H          | -4.174003      | 2.635431  | 4.577464  | H          | -1.209941      | -3.787286 | 4.107158  |
| H          | -0.206541      | -5.166672 | 2.970639  | H          | -3.280685      | 4.400535  | 3.046854  | H          | 0.680679       | -4.512149 | 2.648101  |
| H          | 2.005041       | -4.190357 | 2.531896  | H          | -0.862307      | 4.598858  | 2.674208  | H          | 2.736582       | -3.192232 | 2.542027  |
| H          | 3.101548       | -0.909379 | 1.912310  | H          | 1.637034       | 2.281435  | 1.982045  | H          | 3.204526       | 0.294409  | 2.335376  |
| H          | 4.620464       | 0.196755  | 4.323489  | H          | 3.456737       | 1.854496  | 4.398929  | H          | 4.594720       | 1.311570  | 4.858124  |
| H          | 4.688060       | 0.811656  | 2.655025  | H          | 3.827689       | 1.453532  | 2.709878  | H          | 4.531761       | 2.118809  | 3.268619  |
| H          | 4.057446       | -3.180638 | 2.303369  | H          | 1.438500       | 4.707672  | 2.523114  | H          | 4.494822       | -1.874593 | 2.516242  |
| H          | 3.992392       | -3.796814 | 3.961982  | H          | 1.043015       | 5.122251  | 4.202951  | H          | 4.525102       | -2.637080 | 4.113659  |
| H          | 6.257718       | -2.977647 | 3.323650  | H          | 3.441018       | 5.492253  | 3.633300  | H          | 6.638067       | -1.450220 | 3.551475  |
| H          | 5.590255       | -2.113001 | 4.729219  | H          | 3.229436       | 4.332221  | 4.969610  | H          | 5.877991       | -0.802179 | 5.025555  |
| H          | 7.095900       | -0.150880 | 4.214003  | H          | 5.452152       | 3.345151  | 4.477428  | H          | 7.122379       | 1.397226  | 4.602546  |
| H          | 7.064110       | 0.468389  | 2.531454  | H          | 5.787379       | 2.828334  | 2.801208  | H          | 6.895116       | 2.138171  | 2.993440  |
| H          | 7.735761       | -1.136212 | 2.873896  | H          | 5.637372       | 4.553260  | 3.177088  | H          | 7.816406       | 0.628813  | 3.152035  |
| <b>FV1</b> |                |           |           | <b>FV1</b> |                |           |           | <b>FV1</b> |                |           |           |
| E          | -5082.90232165 |           |           | E          | -5082.90183865 |           |           | E          | -5082.86716115 |           |           |
| O          | 5.675339       | -3.818945 | 0.324228  | O          | -7.224551      | 0.683116  | 0.412074  | C          | -2.240050      | 5.003066  | -1.769690 |
| C          | 4.252910       | -3.830546 | 0.590556  | C          | -6.259124      | -0.385178 | 0.265844  | C          | -3.147888      | 4.804453  | -0.550247 |
| C          | 3.633753       | -4.883052 | -0.342146 | C          | -6.420388      | -1.301837 | 1.488527  | O          | -2.427403      | 5.175117  | 0.620151  |
| C          | 3.914045       | -4.514280 | -1.801228 | C          | -6.167746      | -0.506418 | 2.771706  | C          | -3.648664      | 3.365673  | -0.468388 |
| C          | 5.409631       | -4.326216 | -2.026231 | C          | -7.066423      | 0.723113  | 2.825637  | O          | -4.581222      | 3.315153  | 0.595875  |
| C          | 5.998934       | -3.373070 | -0.978434 | C          | -6.968335      | 1.523561  | 1.520342  | C          | -4.254619      | 2.905840  | -1.801460 |
| H          | 3.828878       | -2.850927 | 0.344466  | H          | -5.247443      | 0.034949  | 0.274658  | O          | -4.448738      | 1.496701  | -1.662030 |
| H          | 4.070790       | -5.867209 | -0.122103 | H          | -7.439531      | -1.713114 | 1.505843  | C          | -3.284036      | 3.214583  | -2.953413 |
| H          | 3.410243       | -3.555964 | -2.002496 | H          | -5.119921      | -0.168269 | 2.748631  | O          | -2.943344      | 4.608784  | -2.933565 |
| H          | 5.899046       | -5.302569 | -1.894013 | H          | -8.107185      | 0.380089  | 2.922653  | C          | -3.821149      | 2.930245  | -4.342679 |
| H          | 7.093440       | -3.379727 | -1.030050 | H          | -7.742670      | 2.298274  | 1.489496  | O          | -2.727401      | 3.100608  | -5.245902 |
| C          | 4.061809       | -4.052856 | 2.102136  | C          | -6.480531      | -1.032000 | -1.113821 | C          | -5.646144      | 0.890763  | -2.102903 |
| O          | 2.212630       | -4.941070 | -0.227172 | O          | -5.463757      | -2.359945 | 1.503840  | C          | -6.351039      | 0.248163  | -0.901777 |
| O          | 3.475869       | -5.514647 | -2.702558 | O          | -6.427061      | -1.268877 | 3.936420  | O          | -6.589404      | 1.248720  | 0.086692  |
| O          | 5.687807       | -3.810853 | -3.323634 | O          | -6.728521      | 1.576407  | 3.913852  | C          | -5.511780      | -0.891668 | -0.340120 |
| O          | 5.499095       | -2.083729 | -1.219964 | O          | -5.689491      | 2.098240  | 1.445912  | O          | -6.274180      | -1.498722 | 0.688071  |
| H          | 3.446140       | -4.934451 | 2.289643  | H          | -6.661441      | -2.103785 | -1.014552 | C          | -5.141814      | -1.866212 | -1.454293 |
| O          | 3.394226       | -2.966077 | 2.732456  | O          | -5.347319      | -0.903203 | -1.964419 | O          | -4.227760      | -2.818477 | -0.898327 |
| H          | 5.052102       | -4.222655 | 2.545125  | H          | -7.370294      | -0.571393 | -1.563178 | C          | -4.482496      | -1.134026 | -2.627775 |
| H          | 2.537236       | -5.701316 | -2.514162 | H          | -5.924725      | -2.102440 | 3.870106  | O          | -5.376921      | -0.089827 | -3.081118 |
| H          | 5.153262       | -4.334678 | -3.938952 | H          | -6.631811      | 0.998450  | 4.685432  | C          | -4.160497      | -2.052260 | -3.817956 |
| H          | 3.935204       | -2.151813 | 2.629611  | H          | -5.172209      | 0.050435  | -2.126555 | O          | -5.053954      | -3.140047 | -3.991715 |
| O          | 6.950292       | 1.041822  | 0.072280  | O          | -4.761697      | 4.911266  | -0.740346 | C          | -4.610804      | -4.168574 | -0.855881 |
| C          | 6.052093       | -0.091816 | 0.114922  | C          | -4.911837      | 3.508596  | -0.417671 | C          | -4.287374      | -4.737037 | 0.526084  |
| C          | 6.382394       | -0.969750 | -1.102159 | C          | -5.562717      | 3.438072  | 0.972642  | O          | -4.981665      | -3.980827 | 1.516517  |
| C          | 6.195495       | -0.165671 | -2.391340 | C          | -4.675200      | 4.146817  | 1.998959  | C          | -2.785580      | -4.721731 | 0.775806  |
| C          | 7.008602       | 1.122248  | -2.344169 | C          | -4.370720      | 5.571768  | 1.553061  | O          | -2.579147      | -5.325834 | 2.038063  |
| C          | 6.734586       | 1.885818  | -1.042045 | C          | -3.855354      | 5.588671  | 0.108025  | C          | -2.063184      | -5.449103 | -0.355727 |
| H          | 5.018566       | 0.259124  | 0.021798  | H          | -3.923260      | 3.039581  | -0.364801 | O          | -0.667043      | -5.208428 | -0.167044 |

|   |           |           |           |   |           |          |           |   |           |           |           |
|---|-----------|-----------|-----------|---|-----------|----------|-----------|---|-----------|-----------|-----------|
| H | 7.422878  | -1.317013 | -1.032643 | H | -6.548501 | 3.923231 | 0.941421  | C | -2.495599 | -4.915261 | -1.734210 |
| H | 5.129428  | 0.101614  | -2.460165 | H | -3.725868 | 3.591109 | 2.051896  | O | -3.937911 | -4.923725 | -1.854958 |
| H | 8.075292  | 0.853275  | -2.349300 | H | -5.310556 | 6.143197 | 1.572813  | C | -1.926199 | -5.727569 | -2.885956 |
| H | 7.443292  | 2.713781  | -0.924611 | H | -3.809837 | 6.616895 | -0.267959 | O | -2.207986 | -7.105319 | -2.671314 |
| C | 6.194594  | -0.751585 | 1.498696  | C | -5.680325 | 2.841490 | -1.573041 | C | 0.235822  | -6.295091 | -0.252225 |
| O | 6.610802  | -0.885094 | -3.538111 | O | -5.286260 | 4.225351 | 3.273992  | C | 0.959718  | -6.451205 | 1.091976  |
| O | 6.712360  | 1.973239  | -3.446215 | O | -3.402703 | 6.191571 | 2.392914  | O | 0.002985  | -6.594528 | 2.141003  |
| O | 5.415053  | 2.363697  | -1.077221 | O | -2.583298 | 4.994936 | 0.081368  | C | 1.876628  | -5.263844 | 1.355139  |
| H | 6.452568  | -1.807519 | 1.399001  | H | -6.569571 | 2.329223 | -1.201536 | O | 2.567880  | -5.548294 | 2.559967  |
| O | 4.985821  | -0.712537 | 2.248376  | O | -4.908266 | 1.850921 | -2.241630 | C | 2.810190  | -5.060423 | 0.164867  |
| H | 7.010423  | -0.245413 | 2.031519  | H | -6.000333 | 3.631329 | -2.265492 | O | 3.587164  | -3.884016 | 0.419901  |
| H | 6.153484  | -1.746727 | -3.536232 | H | -5.568240 | 3.327157 | 3.529349  | C | 1.998378  | -4.906716 | -1.126009 |
| H | 6.725413  | 1.405999  | -4.231620 | H | -3.681349 | 6.006450 | 3.302198  | O | 1.175940  | -6.088384 | -1.283182 |
| H | 4.734593  | 0.224039  | 2.410246  | H | -4.114852 | 2.274001 | -2.639344 | C | 2.858745  | -4.754942 | -2.388905 |
| O | 4.092371  | 5.060410  | 1.050917  | O | -0.132233 | 5.404972 | -2.635928 | O | 4.059978  | -5.505016 | -2.360399 |
| C | 4.375188  | 3.678523  | 0.728740  | C | -1.227226 | 4.741848 | -1.961060 | C | 4.965415  | -4.046886 | 0.624881  |
| C | 5.144528  | 3.681149  | -0.601591 | C | -1.563505 | 5.586554 | -0.722157 | C | 5.412622  | -3.205719 | 1.822187  |
| C | 4.292255  | 4.334924  | -1.692059 | C | -0.337376 | 5.683847 | 0.188852  | O | 4.668589  | -3.585018 | 2.976209  |
| C | 3.837855  | 5.723694  | -1.260505 | C | 0.865057  | 6.210709 | -0.584623 | C | 5.252329  | -1.716638 | 1.537306  |
| C | 3.207323  | 5.679751  | 0.137713  | C | 1.065382  | 5.419637 | -1.884148 | O | 5.797126  | -1.042752 | 2.657459  |
| H | 3.433135  | 3.137742  | 0.586250  | H | -0.903104 | 3.748821 | -1.630919 | C | 5.929716  | -1.325626 | 0.217295  |
| H | 6.083024  | 4.240689  | -0.482338 | H | -1.868108 | 6.594484 | -1.037496 | O | 5.495596  | 0.001389  | -0.092004 |
| H | 3.398153  | 3.706676  | -1.830117 | H | -0.105162 | 4.665362 | 0.537840  | C | 5.493788  | -2.281598 | -0.906028 |
| H | 4.727037  | 6.368475  | -1.198343 | H | 0.657638  | 7.254027 | -0.865318 | O | 5.713391  | -3.646487 | -0.511638 |
| H | 3.054199  | 6.696149  | 0.517324  | H | 1.807216  | 5.915998 | -2.519704 | C | 6.240887  | -2.097461 | -2.212444 |
| C | 5.090700  | 3.051166  | 1.938944  | C | -2.358053 | 4.544088 | -2.987162 | O | 5.564654  | -2.890197 | -3.187513 |
| O | 4.998939  | 4.482251  | -2.910239 | O | -0.549628 | 6.556892 | 1.283339  | C | 6.434559  | 1.038002  | -0.281416 |
| O | 2.894806  | 6.275771  | -2.172720 | O | 2.060346  | 6.139097 | 0.184965  | C | 6.141568  | 2.171239  | 0.707514  |
| O | 1.985938  | 4.992241  | 0.057852  | O | 1.484459  | 4.119643 | -1.558033 | O | 6.221365  | 1.683525  | 2.046800  |
| H | 6.040111  | 2.604694  | 1.638174  | H | -3.289350 | 4.985361 | -2.627945 | C | 4.768752  | 2.772252  | 0.433899  |
| O | 4.336629  | 2.002161  | 2.535354  | O | -2.642862 | 3.171155 | -3.227950 | O | 4.589566  | 3.818259  | 1.373923  |
| H | 5.298571  | 3.852159  | 2.660642  | H | -2.066332 | 5.058077 | -3.912651 | C | 4.693897  | 3.237851  | -1.015819 |
| H | 5.377043  | 3.614805  | -3.146960 | H | -1.375674 | 6.289062 | 1.727568  | O | 3.336144  | 3.612947  | -1.262088 |
| H | 3.265626  | 6.134675  | -3.056615 | H | 1.838269  | 6.495859 | 1.057924  | C | 5.097337  | 2.098907  | -1.971643 |
| H | 3.488794  | 2.366040  | 2.875165  | H | -1.840566 | 2.736182 | -3.593666 | O | 6.375676  | 1.543919  | -1.597743 |
| O | -0.684684 | 5.224900  | 2.584901  | O | 3.165952  | 1.829553 | -3.898485 | C | 5.189952  | 2.558221  | -3.417789 |
| C | 0.498263  | 4.635020  | 1.995981  | C | 2.008617  | 2.377774 | -3.224462 | O | 6.008244  | 3.721255  | -3.491514 |
| C | 0.864051  | 5.500346  | 0.779478  | C | 2.520915  | 3.519346 | -2.333200 | C | 3.064239  | 4.844296  | -1.904720 |
| C | -0.294439 | 5.499330  | -0.220408 | C | 3.523900  | 2.969293 | -1.316082 | C | 2.297126  | 5.756029  | -0.937015 |
| C | -1.583662 | 5.947573  | 0.457005  | C | 4.643459  | 2.212644 | -2.020691 | O | 3.052413  | 5.934459  | 0.261037  |
| C | -1.823136 | 5.150721  | 1.747644  | C | 4.078400  | 1.194601 | -3.021658 | C | 0.930120  | 5.160540  | -0.629878 |
| H | 0.265282  | 3.622765  | 1.648082  | H | 1.559848  | 1.607604 | -2.587513 | O | 0.267310  | 6.073765  | 0.232541  |
| H | 1.064088  | 6.529363  | 1.109984  | H | 3.010942  | 4.277879 | -2.959716 | C | 0.177777  | 4.900101  | -1.932899 |
| H | -0.430003 | 4.465315  | -0.573952 | H | 2.980991  | 2.261880 | -0.669559 | O | -1.060412 | 4.259684  | -1.602239 |
| H | -1.469182 | 7.004692  | 0.739709  | H | 5.234235  | 2.941558 | -2.594755 | C | 1.017548  | 3.999529  | -2.847970 |
| H | -2.643340 | 5.594543  | 2.322896  | H | 4.879527  | 0.808137 | -3.661568 | O | 2.297100  | 4.639579  | -3.069736 |
| C | 1.560512  | 4.510507  | 3.103309  | C | 0.970336  | 2.752479 | -4.298733 | C | 0.378662  | 3.730818  | -4.216614 |
| O | -0.065259 | 6.376892  | -1.309209 | O | 4.129369  | 3.994130 | -0.550064 | O | -0.325085 | 4.839323  | -4.746004 |
| O | -2.710426 | 5.790016  | -0.397898 | O | 5.479363  | 1.527776 | -1.092115 | H | -2.014631 | 6.064728  | -1.908981 |
| O | -2.118550 | 3.822905  | 1.405139  | O | 3.468858  | 0.152290 | -2.308551 | H | -4.019122 | 5.462707  | -0.679919 |

|   |           |           |           |   |           |           |           |   |           |           |           |
|---|-----------|-----------|-----------|---|-----------|-----------|-----------|---|-----------|-----------|-----------|
| H | 2.484354  | 5.014693  | 2.814877  | H | 0.713890  | 3.811740  | -4.239154 | H | -2.927813 | 4.866400  | 1.389907  |
| O | 1.918869  | 3.158129  | 3.365414  | O | -0.253378 | 2.043387  | -4.143607 | H | -2.785352 | 2.712688  | -0.268150 |
| H | 1.166562  | 4.998799  | 4.004415  | H | 1.419390  | 2.560700  | -5.282201 | H | -5.112928 | 2.500105  | 0.510622  |
| H | 0.814832  | 6.176185  | -1.678138 | H | 3.421592  | 4.547958  | -0.170899 | H | -5.215751 | 3.414166  | -1.960494 |
| H | -2.425238 | 6.083391  | -1.276084 | H | 5.693904  | 2.161397  | -0.391168 | H | -2.380706 | 2.610586  | -2.804589 |
| H | 1.123798  | 2.669285  | 3.673329  | H | -0.084859 | 1.081285  | -4.257394 | H | -4.636054 | 3.633759  | -4.567019 |
| O | -3.831653 | 1.432608  | 3.605007  | O | 2.603322  | -3.157872 | -3.660591 | H | -4.212394 | 1.905328  | -4.380568 |
| C | -2.659320 | 2.052199  | 3.028079  | C | 2.335405  | -1.776578 | -3.326201 | H | -3.058114 | 3.051008  | -6.151042 |
| C | -3.174764 | 3.149082  | 2.087087  | C | 3.641061  | -1.188256 | -2.771807 | H | -6.299383 | 1.628198  | -2.582460 |
| C | -4.027603 | 2.527851  | 0.973381  | C | 4.114841  | -1.982413 | -1.549691 | H | -7.307809 | -0.161604 | -1.255413 |
| C | -5.133972 | 1.647937  | 1.548724  | C | 4.198640  | -3.472285 | -1.862428 | H | -6.919620 | 0.773913  | 0.865366  |
| C | -4.592052 | 0.715580  | 2.653541  | C | 2.903034  | -3.954253 | -2.532120 | H | -4.578853 | -0.468787 | 0.060775  |
| H | -2.110526 | 1.310927  | 2.437090  | H | 1.571570  | -1.732245 | -2.542434 | H | -5.758976 | -2.240020 | 1.060582  |
| H | -3.778094 | 3.868071  | 2.658522  | H | 4.417274  | -1.222684 | -3.549020 | H | -6.039952 | -2.373261 | -1.823912 |
| H | -3.347659 | 1.902980  | 0.374688  | H | 3.373937  | -1.838481 | -0.749310 | H | -3.550786 | -0.665449 | -2.287822 |
| H | -5.875339 | 2.312019  | 2.014656  | H | 5.016631  | -3.622434 | -2.583251 | H | -3.127080 | -2.408548 | -3.705156 |
| H | -5.426064 | 0.277170  | 3.213056  | H | 3.029825  | -4.974148 | -2.912330 | H | -4.199624 | -1.442155 | -4.724509 |
| C | -1.734316 | 2.492811  | 4.177297  | C | 1.756538  | -1.098283 | -4.580609 | H | -4.719123 | -3.880066 | -3.458076 |
| O | -4.631133 | 3.523051  | 0.167017  | O | 5.400726  | -1.558686 | -1.127001 | H | -5.677181 | -4.278996 | -1.077420 |
| O | -5.780856 | 0.843274  | 0.564357  | O | 4.415762  | -4.261678 | -0.701131 | H | -4.632602 | -5.780335 | 0.544850  |
| O | -3.821030 | -0.289510 | 2.049077  | O | 1.866989  | -3.904840 | -1.584034 | H | -4.253850 | 2.366794  | 2.366794  |
| H | -1.541960 | 3.566381  | 4.133884  | H | 2.332415  | -0.207589 | -4.838022 | H | -2.443658 | -3.675004 | 0.778172  |
| O | -0.457426 | 1.864876  | 4.117626  | O | 0.415618  | -0.659038 | -4.395537 | H | -1.640849 | -5.593235 | 2.110983  |
| H | -2.242858 | 2.270203  | 5.124578  | H | 1.830455  | -1.810134 | -5.413420 | H | -2.282314 | -6.520320 | -0.297940 |
| H | -3.924222 | 4.115723  | -0.152595 | H | 5.347363  | -0.611402 | -0.905748 | H | -2.134598 | -3.883254 | -1.830938 |
| H | -5.560970 | 1.149487  | -0.339057 | H | 5.011266  | -3.771447 | -0.112349 | H | -0.844657 | -5.543418 | -2.921677 |
| H | -0.566089 | 0.893643  | 4.217230  | H | -0.154986 | -1.434712 | -4.197660 | H | -2.375408 | -5.364743 | -3.822856 |
| O | -2.845342 | -3.566062 | 3.380272  | O | -1.288155 | -5.781479 | -1.853828 | H | -1.735247 | -7.613096 | -3.342141 |
| C | -2.668153 | -2.157861 | 3.102897  | C | -0.442275 | -4.623911 | -2.052288 | H | -0.300026 | -7.210856 | -0.519724 |
| C | -3.973486 | -1.639880 | 2.485234  | C | 0.947552  | -4.990328 | -1.507306 | H | 1.579113  | -7.357611 | 1.031764  |
| C | -4.332395 | -2.440433 | 1.231880  | C | 0.841645  | -5.329894 | -0.018001 | H | 0.512855  | -6.496412 | 2.960919  |
| C | -4.325841 | -3.938375 | 1.503087  | C | -0.190852 | -6.429228 | 0.203798  | H | 1.258371  | -4.359675 | 1.463410  |
| C | -3.027662 | -4.343453 | 2.213683  | C | -1.514699 | -6.084767 | -0.491610 | H | 3.141539  | -4.788895 | 2.777605  |
| H | -1.863895 | -2.030157 | 2.370628  | H | -0.834963 | -3.782604 | -1.470611 | H | 3.469435  | -5.926632 | 0.045512  |
| H | -4.788118 | -1.715919 | 3.219076  | H | 1.339137  | -5.858180 | -2.056799 | H | 1.338402  | -4.032766 | -1.046399 |
| H | -3.552564 | -2.234915 | 0.485049  | H | 0.500096  | -4.421512 | 0.502496  | H | 3.069767  | -3.691949 | -2.544748 |
| H | -5.161541 | -4.175639 | 2.177795  | H | 0.191625  | -7.350885 | -0.259352 | H | 2.246537  | -5.096247 | -3.233867 |
| H | -3.085399 | -5.383346 | 2.554100  | H | -2.181159 | -6.954557 | -0.489556 | H | 4.782462  | -4.870105 | -2.232174 |
| C | -2.227305 | -1.465815 | 4.404763  | C | -0.520333 | -4.233718 | -3.539787 | H | 5.214237  | -5.100890 | 0.781135  |
| O | -5.613216 | -2.100470 | 0.730397  | O | 2.069300  | -5.787210 | 0.520618  | H | 6.480846  | -3.412481 | 1.982862  |
| O | -4.437604 | -4.688486 | 0.297629  | O | -0.444767 | -6.646744 | 1.587806  | H | 4.856029  | -2.910420 | 3.646320  |
| O | -1.959600 | -4.176696 | 1.313387  | O | -2.108334 | -5.006346 | 0.184596  | H | 4.179747  | -1.497052 | 1.430087  |
| H | -2.888503 | -0.627439 | 4.634327  | H | 0.475438  | -4.199574 | -3.984926 | H | 5.837902  | -0.083939 | 2.465312  |
| O | -0.916936 | -0.918430 | 4.318613  | O | -1.079797 | -2.940201 | -3.736381 | H | 7.021315  | -1.354222 | 0.344092  |
| H | -2.301703 | -2.197316 | 5.220599  | H | -1.105845 | -5.003430 | -4.059900 | H | 4.424954  | -2.118698 | -1.090640 |
| H | -5.649309 | -1.129066 | 0.620962  | H | 2.771795  | -5.163543 | 0.251074  | H | 7.280877  | -2.428642 | -2.077853 |
| H | -5.096156 | -4.231203 | -0.247011 | H | 0.423545  | -6.703057 | 2.013377  | H | 6.242920  | -1.033770 | -2.484346 |
| H | -0.280529 | -1.644089 | 4.135958  | H | -2.001232 | -2.931876 | -3.394127 | H | 6.119743  | -2.957753 | -3.973759 |
| O | 1.293702  | -5.854689 | 1.709265  | O | -5.661181 | -4.071745 | -0.064254 | H | 7.455559  | 0.661855  | -0.151085 |
| C | 0.369772  | -4.756295 | 1.895800  | C | -4.266298 | -3.996145 | -0.442999 | H | 6.903571  | 2.948380  | 0.556169  |

|   |           |           |           |   |           |           |           |   |           |           |           |
|---|-----------|-----------|-----------|---|-----------|-----------|-----------|---|-----------|-----------|-----------|
| C | -0.954676 | -5.183617 | 1.241986  | C | -3.516737 | -5.031438 | 0.410088  | H | 5.831789  | 2.378476  | 2.600854  |
| C | -0.725139 | -5.426054 | -0.252539 | C | -3.698138 | -4.709718 | 1.895572  | H | 4.008071  | 1.991588  | 0.580124  |
| C | 0.380886  | -6.456542 | -0.452436 | C | -5.178399 | -4.610557 | 2.244118  | H | 3.951037  | 4.468353  | 1.015180  |
| C | 1.631500  | -6.079385 | 0.354430  | C | -5.903972 | -3.672739 | 1.270499  | H | 5.362861  | 4.091690  | -1.165980 |
| H | 0.749027  | -3.870927 | 1.373678  | H | -3.878425 | -2.999452 | -0.205845 | H | 4.332996  | 1.313013  | -1.913460 |
| H | -1.313164 | -6.108449 | 1.715936  | H | -3.915021 | -6.034266 | 0.200671  | H | 4.170566  | 2.768012  | -3.767491 |
| H | -0.393939 | -4.472776 | -0.694271 | H | -3.232366 | -3.728923 | 2.080000  | H | 5.605239  | 1.734711  | -4.016860 |
| H | 0.018690  | -7.419879 | -0.063783 | H | -5.622396 | -5.610411 | 2.128232  | H | 5.952791  | 4.065738  | -4.391242 |
| H | 2.341807  | -6.913614 | 0.362243  | H | -6.988490 | -3.746541 | 1.408524  | H | 3.995534  | 5.311978  | -2.238456 |
| C | 0.330480  | -4.419411 | 3.398549  | C | -4.186251 | -4.174391 | -1.970327 | H | 2.156567  | 6.728226  | -1.430328 |
| O | -1.882877 | -5.909254 | -0.911016 | O | -3.134549 | -5.702488 | 2.733310  | H | 2.435299  | 6.338243  | 0.891951  |
| O | 0.744353  | -6.587878 | -1.822364 | O | -5.377735 | -4.137471 | 3.571879  | H | 1.078753  | 4.193736  | -0.127457 |
| H | -0.686000 | -4.489608 | 3.788942  | H | -3.529179 | -5.006341 | -2.229823 | H | -0.607294 | 5.705294  | 0.468123  |
| O | 0.761642  | -3.090250 | 3.667738  | O | -3.648661 | -3.031701 | -2.625481 | H | -0.014290 | 5.837679  | -2.465109 |
| H | 0.954716  | -5.154099 | 3.924151  | H | -5.195936 | -4.404400 | -2.335617 | H | 1.193681  | 3.035618  | -2.352721 |
| H | -2.645635 | -5.369033 | -0.627614 | H | -2.210252 | -5.843697 | 2.455320  | H | -0.279292 | 2.860054  | -4.128238 |
| H | -0.085562 | -6.672016 | -2.314469 | H | -4.769290 | -4.644674 | 4.129772  | H | 1.195209  | 3.457575  | -4.898884 |
| H | 1.700810  | -2.998968 | 3.392470  | H | -4.233422 | -2.259430 | -2.458749 | H | -1.264515 | 4.594781  | -4.755871 |
| C | -3.416785 | -3.612803 | -3.441038 | C | 4.112592  | 2.126835  | 5.704970  | C | -1.167305 | 5.705190  | 4.885426  |
| C | -4.494896 | -3.383689 | -4.295089 | C | 5.462463  | 2.069411  | 6.046856  | C | -1.874307 | 5.045461  | 5.889063  |
| C | -5.184057 | -2.175738 | -4.220201 | C | 6.365523  | 1.474586  | 5.168996  | C | -2.158630 | 3.688661  | 5.748726  |
| C | -4.835653 | -1.173876 | -3.299191 | C | 5.956998  | 0.934598  | 3.940796  | C | -1.754324 | 2.961577  | 4.619923  |
| C | -3.710568 | -1.384999 | -2.481841 | C | 4.589525  | 0.973327  | 3.608223  | C | -1.009077 | 3.622631  | 3.624964  |
| C | -3.025883 | -2.605749 | -2.562511 | C | 3.689568  | 1.570908  | 4.499580  | C | -0.732161 | 4.988817  | 3.771635  |
| C | -3.178380 | -0.304969 | -1.562932 | C | 4.063064  | 0.283927  | 2.362968  | C | -0.411813 | 2.859853  | 2.458447  |
| C | -2.940520 | 0.991418  | -2.298482 | C | 4.409437  | -1.185453 | 2.403030  | C | 0.480071  | 1.748066  | 2.956416  |
| C | -1.648962 | 1.471851  | -2.521700 | C | 3.447774  | -2.176145 | 2.602494  | C | 1.868945  | 1.790739  | 2.836335  |
| C | -1.427013 | 2.674322  | -3.195240 | C | 3.796737  | -3.528713 | 2.635941  | C | 2.661434  | 0.724667  | 3.270966  |
| C | -2.518696 | 3.402862  | -3.660682 | C | 5.134729  | -3.890832 | 2.483730  | C | 2.055727  | -0.391404 | 3.842985  |
| C | -3.817265 | 2.931720  | -3.456940 | C | 6.112626  | -2.910369 | 2.292524  | C | 0.669348  | -0.435458 | 4.000266  |
| C | -4.045505 | 1.727771  | -2.775263 | C | 5.763561  | -1.552073 | 2.246358  | C | -0.131504 | 0.630219  | 3.564188  |
| C | -5.793359 | 0.020550  | -3.234129 | C | 7.072738  | 0.425010  | 3.030412  | C | -2.259559 | 1.522082  | 4.531818  |
| N | -5.363710 | 1.237088  | -2.478222 | N | 6.700575  | -0.523902 | 1.958140  | N | -1.551975 | 0.599331  | 3.615537  |
| C | -7.133866 | -0.464647 | -2.638121 | C | 7.773076  | 1.637900  | 2.378995  | C | -3.749807 | 1.561195  | 4.123819  |
| C | -6.420202 | 2.267838  | -2.576777 | C | 7.881896  | -0.932694 | 1.192704  | C | -2.161464 | -0.730796 | 3.650869  |
| C | -7.748631 | 1.764493  | -2.023209 | C | 8.558843  | 0.282895  | 0.567981  | C | -3.626234 | -0.654101 | 3.236397  |
| N | -8.165494 | 0.560410  | -2.732826 | N | 8.938751  | 1.236246  | 1.605330  | N | -4.349097 | 0.230562  | 4.140282  |
| C | -9.458447 | 0.074352  | -2.273858 | C | 9.653904  | 2.381880  | 1.064845  | C | -5.773392 | 0.278478  | 3.856290  |
| H | -2.876785 | -4.554682 | -3.456257 | H | 3.392100  | 2.584616  | 6.376458  | H | -0.939883 | 6.763441  | 4.974916  |
| H | -4.801349 | -4.138089 | -5.013623 | H | 5.811398  | 2.477903  | 6.990588  | H | -2.201861 | 5.579346  | 6.776221  |
| H | -6.025036 | -2.006288 | -4.888492 | H | 7.417877  | 1.426379  | 5.439640  | H | -2.712469 | 3.177055  | 6.532685  |
| H | -2.163966 | -2.761707 | -1.919142 | H | 2.633972  | 1.589467  | 4.240488  | H | -0.159373 | 5.489592  | 2.995026  |
| H | -2.241833 | -0.645899 | -1.112417 | H | 2.978780  | 0.415517  | 2.302931  | H | 0.154020  | 3.548970  | 1.827799  |
| H | -3.879202 | -0.136744 | -0.704654 | H | 4.503282  | 0.726455  | 1.460948  | H | -1.208505 | 2.422209  | 1.844514  |
| H | -0.805229 | 0.896668  | -2.149213 | H | 2.406746  | -1.883502 | 2.714910  | H | 2.343457  | 2.659419  | 2.386664  |
| H | -0.415046 | 3.035236  | -3.351670 | H | 3.032993  | -4.290934 | 2.751816  | H | 3.738613  | 0.757763  | 3.150742  |
| H | -2.366999 | 4.337668  | -4.193013 | H | 5.424164  | -4.937496 | 2.515235  | H | 2.660635  | -1.232950 | 4.168625  |
| H | -4.649375 | 3.513745  | -3.833227 | H | 7.150179  | -3.206978 | 2.184192  | H | 0.213629  | -1.303129 | 4.464580  |
| H | -6.000036 | 0.328420  | -4.273748 | H | 7.825242  | -0.057247 | 3.680698  | H | -2.221970 | 1.101386  | 5.553383  |
| H | -6.952481 | -0.799901 | -1.598863 | H | 7.024267  | 2.180710  | 1.764514  | H | -3.830170 | 2.042697  | 3.129191  |



|          |                |           |           |          |                |           |           |          |                |           |           |
|----------|----------------|-----------|-----------|----------|----------------|-----------|-----------|----------|----------------|-----------|-----------|
| H        | -7.469028      | -1.339767 | -3.201572 | H        | 8.096009       | 2.323349  | 3.168774  | H        | -4.289370      | 2.192286  | 4.836950  |
| H        | -6.578728      | 2.572972  | -3.623887 | H        | 8.620464       | -1.457897 | 1.824022  | H        | -2.105817      | -1.187630 | 4.655060  |
| H        | -6.089446      | 3.133266  | -1.997944 | H        | 7.553006       | -1.609007 | 0.400417  | H        | -1.619282      | -1.376261 | 2.954658  |
| H        | -8.503731      | 2.544903  | -2.175500 | H        | 9.462940       | -0.042653 | 0.040080  | H        | -4.070334      | -1.655177 | 3.277148  |
| H        | -7.663279      | 1.595418  | -0.934932 | H        | 7.878565       | 0.733119  | -0.180169 | H        | -3.682690      | -0.307537 | 2.186227  |
| H        | -9.463615      | -0.219157 | -1.207226 | H        | 9.050814       | 2.979211  | 0.353833  | H        | -6.000662      | 0.703236  | 2.860021  |
| H        | -9.757834      | -0.796589 | -2.865979 | H        | 9.966311       | 3.042677  | 1.879875  | H        | -6.280561      | 0.891586  | 4.608378  |
| H        | -10.213883     | 0.854532  | -2.413622 | H        | 10.552490      | 2.040941  | 0.540562  | H        | -6.195115      | -0.730410 | 3.891546  |
| <b>S</b> |                |           |           | <b>S</b> |                |           |           | <b>S</b> |                |           |           |
| E        | -5082.90167028 |           |           | E        | -5082.90200725 |           |           | E        | -5082.86776045 |           |           |
| O        | -3.469191      | -2.238585 | 0.710077  | O        | -3.262421      | -2.189404 | 1.088194  | C        | 0.023857       | 5.802262  | -0.113658 |
| C        | -2.833369      | -0.942635 | 0.580108  | C        | -2.637271      | -0.898577 | 0.899064  | C        | 0.817817       | 6.240011  | -1.347344 |
| C        | -3.596498      | -0.194671 | -0.523550 | C        | -3.468861      | -0.153981 | -0.156886 | O        | 0.056849       | 5.970836  | -2.520269 |
| C        | -3.500687      | -0.975831 | -1.837139 | C        | -3.487461      | -0.955977 | -1.459266 | C        | 2.167423       | 5.533902  | -1.398906 |
| C        | -3.972855      | -2.414934 | -1.655609 | C        | -3.976683      | -2.377497 | -1.216211 | O        | 2.863547       | 6.074418  | -2.504429 |
| C        | -3.301141      | -3.057247 | -0.434592 | C        | -3.201600      | -3.017548 | -0.057640 | C        | 2.932336       | 5.699032  | -0.080993 |
| H        | -1.795030      | -1.081381 | 0.260550  | H        | -1.621837      | -1.038036 | 0.512124  | O        | 4.045717       | 4.805444  | -0.159860 |
| H        | -4.649010      | -0.093522 | -0.228834 | H        | -4.495158      | -0.025948 | 0.214471  | C        | 2.031388       | 5.328116  | 1.109340  |
| H        | -2.439704      | -0.994824 | -2.131581 | H        | -2.452869      | -1.003234 | -1.832146 | O        | 0.799801       | 6.069471  | 1.043615  |
| H        | -5.057605      | -2.414294 | -1.478684 | H        | -6.403632      | 1.023492  | -1.709059 | C        | 2.630021       | 5.626589  | 2.470344  |
| H        | -3.787394      | -4.008228 | -0.190907 | H        | -3.671465      | -3.962601 | 0.236468  | O        | 1.766458       | 5.033691  | 3.438071  |
| C        | -2.802833      | -0.286691 | 1.973147  | C        | -2.520501      | -0.226982 | 2.279605  | C        | 5.349111       | 5.266947  | 0.121958  |
| O        | -3.048327      | 1.091060  | -0.807699 | O        | -2.908874      | 1.112432  | -0.502799 | C        | 6.250073       | 4.994769  | -1.090459 |
| O        | -4.288424      | -0.391035 | -2.863321 | O        | -4.336253      | -0.368762 | -2.436645 | O        | 5.692704       | 5.608909  | -2.250291 |
| O        | -3.674876      | -3.212855 | -2.801488 | O        | -3.812969      | -3.190450 | -2.380637 | C        | 6.434936       | 3.497467  | -1.302603 |
| O        | -1.941299      | -3.255728 | -0.722097 | O        | -1.873890      | -3.230791 | -0.465128 | O        | 7.358095       | 3.351505  | -2.365783 |
| H        | -3.309230      | 0.679594  | 1.960959  | H        | -3.002885      | 0.752098  | 2.275956  | C        | 6.913086       | 2.851573  | -0.005730 |
| O        | -1.477077      | -0.029516 | 2.422416  | O        | -1.169380      | 0.002736  | 2.662011  | O        | 6.956566       | 1.437255  | -0.222054 |
| H        | -3.336700      | -0.946066 | 2.670069  | H        | -3.037863      | -0.864048 | 3.009079  | C        | 5.960991       | 3.187340  | 1.146861  |
| H        | -4.076665      | 0.560801  | -2.897519 | H        | -4.063482      | 0.561177  | -2.550468 | O        | 5.878100       | 4.627333  | 1.264922  |
| H        | -4.018735      | -2.726863 | -3.564702 | H        | -4.132946      | -2.657367 | -3.123115 | C        | 6.409138       | 2.610679  | 2.500656  |
| H        | -0.996551      | -0.882021 | 2.512973  | H        | -0.701321      | -0.859331 | 2.726969  | O        | 7.811595       | 2.527525  | 2.676605  |
| O        | 0.316727       | -5.557714 | 1.050888  | O        | 0.480393       | -5.540244 | 1.172602  | C        | 8.191398       | 0.779749  | -0.090525 |
| C        | -0.296568      | -4.271884 | 0.796524  | C        | -0.140047      | -4.250009 | 0.959248  | C        | 8.394920       | -0.150958 | -1.285914 |
| C        | -1.324755      | -4.479205 | -0.326269 | C        | -1.231594      | -4.451574 | -0.103588 | O        | 8.348431       | 0.617753  | -2.485180 |
| C        | -0.625866      | -5.012458 | -1.579630 | C        | -0.605702      | -4.978806 | -1.397167 | C        | 7.342561       | -1.251353 | -1.296947 |
| C        | 0.165513       | -6.273469 | -1.254597 | C        | 0.202897       | -6.241567 | -1.125785 | O        | 7.657218       | -2.100168 | -2.383879 |
| C        | 1.074176       | -6.044169 | -0.040016 | C        | 1.176054       | -6.023588 | 0.040279  | C        | 7.334482       | -1.982186 | 0.043627  |
| H        | 0.466318       | -3.567936 | 0.446426  | H        | 0.604956       | -3.548617 | 0.567900  | O        | 6.185551       | -2.832619 | 0.032752  |
| H        | -2.087566      | -5.198625 | 0.003458  | H        | -1.973054      | -5.173724 | 0.266562  | C        | 7.231415       | -0.995816 | 1.221854  |
| H        | 0.080620       | -4.237936 | -1.916879 | H        | 0.080077       | -4.202454 | -1.771326 | O        | 8.246330       | 0.030257  | 1.116396  |
| H        | -0.549668      | -7.064734 | -0.984858 | H        | -0.496994      | -7.034951 | -0.824091 | C        | 7.388332       | -1.672701 | 2.573762  |
| H        | 1.504939       | -6.993108 | 0.298612  | H        | 1.618208       | -6.977279 | 0.349651  | O        | 8.570154       | -2.464522 | 2.566382  |
| C        | -0.841573      | -3.739217 | 2.134082  | C        | -0.601991      | -3.720325 | 2.329170  | C        | 6.316701       | -4.175626 | 0.460285  |
| O        | -1.541105      | -5.343893 | -2.607551 | O        | -1.580727      | -5.303646 | -2.371385 | C        | 5.981735       | -5.108874 | -0.710852 |
| O        | 0.965442       | -6.691678 | -2.355506 | O        | 0.943020       | -6.651009 | -2.270884 | O        | 6.814019       | -4.798564 | -1.827787 |
| O        | 2.086755       | -5.143154 | -0.406208 | O        | 2.174358       | -5.126526 | -0.372682 | C        | 4.510804       | -4.994112 | -1.087859 |
| H        | -1.906481      | -3.512545 | 2.054229  | H        | -1.668039      | -3.486948 | 2.314595  | O        | 4.277649       | -5.956560 | -2.102263 |
| O        | -0.212832      | -2.528688 | 2.537953  | O        | 0.057421       | -2.515105 | 2.699156  | C        | 3.640008       | -5.205739 | 0.147477  |
| H        | -0.711751      | -4.526512 | 2.888599  | H        | -0.431145      | -4.511395 | 3.071350  | O        | 2.279237       | -4.978993 | -0.239803 |

|   |           |           |           |   |           |           |           |   |           |           |           |
|---|-----------|-----------|-----------|---|-----------|-----------|-----------|---|-----------|-----------|-----------|
| H | -2.106509 | -4.565541 | -2.772730 | H | -2.168111 | -4.531998 | -2.479228 | C | 4.049154  | -4.237851 | 1.262984  |
| H | 0.390657  | -6.643660 | -3.134123 | H | 0.326073  | -6.607023 | -3.016614 | O | 5.454883  | -4.440915 | 1.545206  |
| H | 0.749618  | -2.688048 | 2.658300  | H | 1.022910  | -2.685059 | 2.772914  | C | 3.266366  | -4.431301 | 2.571345  |
| O | 5.257467  | -4.671476 | 1.402899  | O | 5.433498  | -4.702892 | 1.287692  | O | 2.911181  | -5.776426 | 2.838345  |
| C | 3.874077  | -4.372250 | 1.101099  | C | 4.040488  | -4.385705 | 1.056331  | C | 1.406011  | -6.077312 | -0.232809 |
| C | 3.419674  | -5.386204 | 0.039764  | C | 3.526264  | -5.381543 | 0.004898  | C | 0.572810  | -6.078002 | -1.516754 |
| C | 4.294812  | -5.259902 | -1.209748 | C | 4.340647  | -5.242695 | -1.283800 | O | 1.438063  | -6.114928 | -2.646801 |
| C | 5.768990  | -5.393755 | -0.848088 | C | 5.829346  | -5.395289 | -0.995938 | C | -0.339194 | -4.857802 | -1.569760 |
| C | 6.129736  | -4.455246 | 0.310784  | C | 6.255974  | -4.479851 | 0.159077  | O | -1.126109 | -4.998385 | -2.735317 |
| H | 3.804257  | -3.365238 | 0.675481  | H | 3.961087  | -3.372464 | 0.647390  | C | -1.180144 | -4.739895 | -0.292610 |
| H | 3.503279  | -6.404206 | 0.445745  | H | 3.623708  | -6.405524 | 0.392350  | O | -1.805883 | -3.455852 | -0.331998 |
| H | 4.130911  | -4.253502 | -1.625766 | H | 4.166166  | -4.228529 | -1.676146 | C | -0.275850 | -4.842974 | 0.947322  |
| H | 5.942825  | -6.423590 | -0.502434 | H | 6.008914  | -6.432262 | -0.675425 | O | 0.526341  | -6.035039 | 0.878456  |
| H | 7.134434  | -4.681233 | 0.685235  | H | 7.274003  | -4.724702 | 0.482116  | C | -1.018164 | -4.914786 | 2.267226  |
| C | 3.093815  | -4.370042 | 2.428571  | C | 3.326170  | -4.393306 | 2.420394  | O | -0.039481 | -4.769475 | 3.295777  |
| O | 4.004746  | -6.257716 | -2.171768 | O | 3.995191  | -6.222992 | -2.245496 | C | -3.212188 | -3.349548 | -0.238353 |
| O | 6.612707  | -5.100040 | -1.956426 | O | 6.621828  | -5.091752 | -2.138845 | C | -3.750480 | -2.586987 | -1.451338 |
| O | 6.059441  | -3.130897 | -0.150332 | O | 6.182290  | -3.147096 | -0.276700 | O | -3.381390 | -3.275048 | -2.651736 |
| H | 2.256670  | -5.069179 | 2.386896  | H | 2.480569  | -5.083261 | 2.411284  | C | -3.216408 | -1.161199 | -1.461210 |
| O | 2.527871  | -3.099164 | 2.726535  | O | 2.789634  | -3.120855 | 2.762492  | O | -3.804989 | -0.511451 | -2.577512 |
| H | 3.778275  | -4.697254 | 3.222448  | H | 4.045394  | -4.737959 | 3.175182  | C | -3.556194 | -0.481310 | -0.140274 |
| H | 3.044675  | -6.241495 | -2.344009 | H | 3.027523  | -6.199875 | -2.366134 | O | -2.882823 | 0.781078  | -0.137756 |
| H | 6.240104  | -5.582154 | -2.709736 | H | 6.210036  | -5.559445 | -2.880715 | C | -3.100770 | -1.330834 | 1.060654  |
| H | 3.250616  | -2.439853 | 2.823100  | H | 3.522627  | -2.469249 | 2.830663  | O | -3.591764 | -2.681397 | 0.945876  |
| O | 7.633592  | -0.244369 | 1.506901  | O | 7.867918  | -0.307090 | 1.351038  | C | -3.597056 | -0.774257 | 2.386249  |
| C | 6.542318  | -1.158570 | 1.245909  | C | 6.752956  | -1.201209 | 1.123118  | O | -5.007581 | -0.576889 | 2.313511  |
| C | 7.068591  | -2.206742 | 0.253162  | C | 7.221697  | -2.243729 | 0.096096  | C | -3.599748 | 1.931308  | 0.268315  |
| C | 7.524898  | -1.517862 | -1.035289 | C | 7.636807  | -1.544719 | -1.200941 | C | -3.640816 | 2.935628  | -0.890639 |
| C | 8.540938  | -0.424518 | -0.728155 | C | 8.682259  | -0.471885 | -0.920707 | O | -4.189215 | 2.308805  | -2.053229 |
| C | 8.020349  | 0.508076  | 0.373546  | C | 8.220308  | 0.453955  | 0.212258  | C | -2.251676 | 3.484106  | -1.185432 |
| H | 5.716276  | -0.614266 | 0.775253  | H | 5.916812  | -0.638321 | 0.693976  | O | -2.412484 | 4.469392  | -2.191612 |
| H | 7.915438  | -2.744247 | 0.702686  | H | 8.077533  | -2.799913 | 0.503924  | C | -1.630258 | 4.033717  | 0.095847  |
| H | 6.638095  | -1.048596 | -1.489490 | H | 6.740393  | -1.055142 | -1.612828 | O | -0.292193 | 4.439535  | -0.219056 |
| H | 9.452835  | -0.906257 | -0.345143 | H | 9.600640  | -0.972920 | -0.580358 | C | -1.630854 | 2.961834  | 1.191749  |
| H | 8.820774  | 1.172060  | 0.718725  | H | 9.043427  | 1.102245  | 0.533039  | O | -2.997427 | 2.529292  | 1.395764  |
| C | 6.037795  | -1.685760 | 2.601880  | C | 6.296701  | -1.739001 | 2.491880  | C | -1.078900 | 3.449932  | 2.540658  |
| O | 8.137691  | -2.420071 | -1.938525 | O | 8.197907  | -2.444079 | -2.139838 | O | -1.346306 | 4.814182  | 2.814032  |
| O | 8.845024  | 0.352548  | -1.881415 | O | 8.953111  | 0.315597  | -2.075200 | H | -0.882068 | 6.405768  | -0.003062 |
| O | 6.947267  | 1.253291  | -0.141141 | O | 7.138395  | 1.220069  | -0.250289 | H | 0.995694  | 7.321437  | -1.256275 |
| H | 6.061701  | -2.776591 | 2.626799  | H | 6.307765  | -2.830303 | 2.502639  | H | 0.673277  | 6.054971  | -3.263536 |
| O | 4.688508  | -1.317496 | 2.862523  | O | 4.963623  | -1.357904 | 2.811003  | H | 1.984242  | 4.456435  | -1.532806 |
| H | 6.711426  | -1.307277 | 3.382099  | H | 7.005821  | -1.378572 | 3.248834  | H | 3.785780  | 5.749571  | -2.485561 |
| H | 7.534661  | -3.176086 | -2.065998 | H | 7.576172  | -3.186686 | -2.255745 | H | 3.279013  | 6.738040  | 0.009318  |
| H | 9.001349  | -0.281863 | -2.596787 | H | 9.070083  | -0.311578 | -2.804347 | H | 1.817414  | 4.253999  | 1.051276  |
| H | 4.624926  | -0.337072 | 2.900792  | H | 4.911414  | -0.377483 | 2.861966  | H | 2.690954  | 6.717070  | 2.601180  |
| O | 5.668637  | 4.375027  | 1.335131  | O | 5.949211  | 4.337461  | 1.306217  | H | 3.644038  | 5.208655  | 2.521150  |
| C | 5.697416  | 2.939826  | 1.150885  | C | 5.957249  | 2.904317  | 1.105312  | H | 2.020968  | 5.346444  | 4.314643  |
| C | 6.854467  | 2.639047  | 0.185359  | C | 7.076614  | 2.602494  | 0.096669  | H | 5.335638  | 6.337073  | 0.356764  |
| C | 6.618738  | 3.355896  | -1.146418 | C | 6.804386  | 3.338743  | -1.217549 | H | 7.234040  | 5.435418  | -0.875380 |
| C | 6.404965  | 4.847768  | -0.920180 | C | 6.612805  | 4.829695  | -0.967168 | H | 6.193117  | 5.244971  | -2.997623 |

|   |           |          |           |   |           |          |           |   |           |           |           |
|---|-----------|----------|-----------|---|-----------|----------|-----------|---|-----------|-----------|-----------|
| C | 5.340555  | 5.087769 | 0.158525  | C | 5.586857  | 5.065284 | 0.149091  | H | 5.459911  | 3.057704  | -1.563866 |
| H | 4.759829  | 2.613419 | 0.687678  | H | 5.001239  | 2.592221 | 0.670845  | H | 7.542059  | 2.400391  | -2.494567 |
| H | 7.798873  | 2.986793 | 0.627317  | H | 8.040431  | 2.932072 | 0.509633  | H | 7.910020  | 3.225449  | 0.252483  |
| H | 5.701001  | 2.937308 | -1.588543 | H | 5.868172  | 2.934594 | -1.633523 | H | 4.959337  | 2.801069  | 0.918941  |
| H | 7.349028  | 5.273050 | -0.548391 | H | 7.572491  | 5.242675 | -0.622605 | H | 5.935733  | 1.627933  | 2.625180  |
| H | 5.325428  | 6.144422 | 0.448305  | H | 5.587574  | 6.118883 | 0.450147  | H | 6.011371  | 3.266800  | 3.282298  |
| C | 5.777618  | 2.291096 | 2.545159  | C | 6.077844  | 2.238476 | 2.488346  | H | 8.091483  | 1.654976  | 2.352887  |
| O | 7.715039  | 3.217737 | -2.032086 | O | 7.868902  | 3.200217 | -2.141046 | H | 9.011242  | 1.501737  | -0.021679 |
| O | 6.005872  | 5.511434 | -2.114528 | O | 6.179413  | 5.510377 | -2.139878 | H | 9.384365  | -0.617569 | -1.178674 |
| O | 4.091589  | 4.696901 | -0.350364 | O | 4.319696  | 4.686107 | -0.322153 | H | 8.263687  | -0.024525 | -3.206408 |
| H | 6.645850  | 1.633868 | 2.617879  | H | 6.936610  | 1.565706 | 2.520814  | H | 6.354122  | -0.785625 | -1.433577 |
| O | 4.646126  | 1.479095 | 2.835284  | O | 4.944004  | 1.441941 | 2.811167  | H | 7.206997  | -2.958953 | -2.255231 |
| H | 5.890044  | 3.095401 | 3.284263  | H | 6.231779  | 3.031684 | 3.231888  | H | 8.251859  | -2.571407 | 0.143045  |
| H | 7.925546  | 2.268254 | -2.106500 | H | 8.063013  | 2.249219 | -2.237776 | H | 6.241184  | -0.523654 | 1.188251  |
| H | 6.604684  | 5.196145 | -2.807821 | H | 6.751893  | 5.197944 | -2.856363 | H | 6.496267  | -2.289727 | 2.743925  |
| H | 3.837659  | 2.038706 | 2.825577  | H | 4.145559  | 2.014683 | 2.843318  | H | 7.429096  | -0.893662 | 3.349970  |
| O | 0.843827  | 5.736889 | 1.036561  | O | 1.122812  | 5.730415 | 1.176664  | H | 8.600173  | -2.961727 | 3.392975  |
| C | 1.975907  | 4.845200 | 0.904779  | C | 2.251097  | 4.839806 | 1.008300  | H | 7.329204  | -4.356598 | 0.833572  |
| C | 2.953840  | 5.512549 | -0.074690 | C | 3.194953  | 5.504764 | -0.005853 | H | 6.175400  | -6.139645 | -0.381120 |
| C | 2.268301  | 5.728162 | -1.426511 | C | 2.463581  | 5.718464 | -1.333456 | H | 6.426805  | -5.286371 | -2.572163 |
| C | 0.972663  | 6.511906 | -1.250994 | C | 1.174452  | 6.501383 | -1.115551 | H | 4.326139  | -3.976393 | -1.464382 |
| C | 0.100129  | 5.880328 | -0.158461 | C | 0.339805  | 5.872695 | 0.007927  | H | 3.349635  | -5.881053 | -2.397048 |
| H | 1.642523  | 3.894784 | 0.473877  | H | 1.904032  | 3.887764 | 0.592037  | H | 3.757685  | -6.226292 | 0.526472  |
| H | 3.274070  | 6.481801 | 0.332851  | H | 3.531798  | 6.473936 | 0.388300  | H | 3.910745  | -3.203186 | 0.922831  |
| H | 2.019948  | 4.735129 | -1.832704 | H | 2.202128  | 4.724388 | -1.728924 | H | 2.375926  | -3.794549 | 2.546370  |
| H | 1.232726  | 7.527147 | -0.916304 | H | 1.444503  | 7.518010 | -0.793459 | H | 3.909266  | -4.067162 | 3.383005  |
| H | -0.736016 | 6.542875 | 0.091821  | H | -0.486646 | 6.536848 | 0.284556  | H | 1.959872  | -5.854483 | 2.663519  |
| C | 2.508310  | 4.550996 | 2.319509  | C | 2.832374  | 4.551337 | 2.404609  | H | 1.960029  | -7.015419 | -0.131510 |
| O | 3.080696  | 6.455070 | -2.330461 | O | 3.244177  | 6.443883 | -2.265968 | H | -0.056570 | -6.979787 | -1.498113 |
| O | 0.222926  | 6.571244 | -2.459476 | O | 0.384237  | 6.556365 | -2.298540 | H | 0.888311  | -5.877631 | -3.409263 |
| O | -0.370482 | 4.643144 | -0.624980 | O | -0.149009 | 4.634161 | -0.438322 | H | 0.294246  | -3.958742 | -1.623272 |
| H | 3.562357  | 4.822123 | 2.401376  | H | 3.893289  | 4.804577 | 2.442614  | H | -1.794040 | -4.282674 | -2.756305 |
| O | 2.431252  | 3.170310 | 2.654071  | O | 2.745265  | 3.176009 | 2.758290  | H | -1.937166 | -5.536744 | -0.281906 |
| H | 1.937424  | 5.164881 | 3.028621  | H | 2.299932  | 5.182850 | 3.128089  | H | 0.376203  | -3.961076 | 0.964136  |
| H | 3.948660  | 6.012755 | -2.379110 | H | 4.111709  | 6.004208 | -2.340357 | H | -1.530397 | -5.885534 | 2.335194  |
| H | 0.855266  | 6.808320 | -3.154134 | H | 0.992198  | 6.794200 | -3.014439 | H | -1.771234 | -4.116966 | 2.306506  |
| H | 1.488873  | 2.888957 | 2.654574  | H | 1.799302  | 2.909432 | 2.784414  | H | -0.437661 | -5.010607 | 4.140862  |
| O | -3.197239 | 2.766893 | 0.805067  | O | -2.982093 | 2.830170 | 1.069721  | H | -3.666937 | -4.344449 | -0.176304 |
| C | -1.801875 | 3.123274 | 0.681028  | C | -1.579025 | 3.145777 | 0.909246  | H | -4.845816 | -2.553377 | -1.368836 |
| C | -1.717968 | 4.267351 | -0.341945 | C | -1.494529 | 4.275133 | -0.129399 | H | -3.561021 | -2.650018 | -3.370860 |
| C | -2.300101 | 3.812680 | -1.682875 | C | -2.102807 | 3.805916 | -1.453038 | H | -2.120896 | -1.189280 | -1.565301 |
| C | -3.713934 | 3.277523 | -1.497946 | C | -3.523150 | 3.298312 | -1.239673 | H | -3.732849 | 0.455261  | -2.452257 |
| C | -3.753384 | 2.230627 | -0.378290 | C | -3.572346 | 2.280523 | -0.091949 | H | -4.638724 | -0.335474 | -0.081247 |
| H | -1.238759 | 2.267006 | 0.293425  | H | -1.051169 | 2.269288 | 0.517639  | H | -2.002873 | -1.343915 | 1.084658  |
| H | -2.282644 | 5.134462 | 0.028585  | H | -2.045179 | 5.152311 | 0.238474  | H | -3.076684 | 0.173412  | 2.570710  |
| H | -1.665813 | 2.993430 | -2.055890 | H | -1.487043 | 2.969304 | -1.819162 | H | -3.334986 | -1.484202 | 3.183805  |
| H | -4.362190 | 4.109599 | -1.188583 | H | -4.152736 | 4.151084 | -0.948761 | H | -5.278474 | -0.013239 | 3.048493  |
| H | -4.790145 | 1.979093 | -0.132676 | H | -4.611492 | 2.062805 | 0.177813  | H | -4.611300 | 1.657687  | 0.582788  |
| C | -1.274726 | 3.427736 | 2.094650  | C | -1.002941 | 3.448545 | 2.304864  | H | -4.286719 | 3.769883  | -0.584127 |
| O | -2.365464 | 4.868598 | -2.625187 | O | -2.167924 | 4.843145 | -2.414974 | H | -4.021028 | 2.931608  | -2.778598 |

|            |                |           |            |            |                |           |           |            |                |           |           |
|------------|----------------|-----------|------------|------------|----------------|-----------|-----------|------------|----------------|-----------|-----------|
| O          | -4.214492      | 2.690067  | -2.697896  | O          | -4.041242      | 2.691791  | -2.423218 | H          | -1.618341      | 2.657901  | -1.543840 |
| H          | -0.803378      | 4.411446  | 2.127583   | H          | -0.545892      | 4.439375  | 2.329184  | H          | -1.536110      | 4.842131  | -2.407750 |
| O          | -0.280522      | 2.502263  | 2.519126   | O          | 0.021264       | 2.535470  | 2.681423  | H          | -2.206198      | 4.890447  | 0.460771  |
| H          | -2.132594      | 3.432011  | 2.779907   | H          | -1.833623      | 3.433223  | 3.022699  | H          | -1.039599      | 2.097117  | 0.862943  |
| H          | -1.479104      | 5.270507  | -2.687775  | H          | -1.281948      | 5.245122  | -2.487184 | H          | -0.002347      | 3.253936  | 2.574704  |
| H          | -4.003794      | 3.315853  | -3.407331  | H          | -3.816214      | 3.293669  | -3.148933 | H          | -1.550594      | 2.835203  | 3.317809  |
| H          | -0.668728      | 1.599359  | 2.540436   | H          | -0.356165      | 1.628793  | 2.727612  | H          | -0.512811      | 5.292897  | 2.680856  |
| C          | -8.234730      | -0.481727 | 4.419618   | C          | -8.832065      | 3.316671  | -2.272658 | C          | -10.308207     | -0.718132 | 3.670714  |
| C          | -7.147165      | -1.183345 | 3.901906   | C          | -7.569519      | 2.726369  | -2.286880 | C          | -9.024226      | -1.257701 | 3.614813  |
| C          | -6.995399      | -1.291148 | 2.521069   | C          | -7.384489      | 1.489757  | -1.672828 | C          | -8.321572      | -1.239117 | 2.411231  |
| C          | -7.917173      | -0.715545 | 1.633863   | C          | -8.437839      | 0.818078  | -1.035170 | C          | -8.879567      | -0.694763 | 1.244285  |
| C          | -9.000372      | 0.014078  | 2.157584   | C          | -9.709349      | 1.420393  | -1.011816 | C          | -10.165666     | -0.126076 | 1.308491  |
| C          | -9.140704      | 0.117925  | 3.546863   | C          | -9.883985      | 2.663538  | -1.633265 | C          | -10.859395     | -0.148289 | 2.524823  |
| C          | -9.939040      | 0.778269  | 1.242341   | C          | -10.857260     | 0.798527  | -0.238926 | C          | -10.756377     | 0.606736  | 0.118298  |
| C          | -9.156461      | 1.785202  | 0.432421   | C          | -10.484208     | 0.668397  | 1.218028  | C          | -9.849106      | 1.744886  | -0.285506 |
| C          | -9.237759      | 3.157247  | 0.665292   | C          | -11.047786     | 1.470537  | 2.209012  | C          | -10.179569     | 3.080813  | -0.063490 |
| C          | -8.496849      | 4.065236  | -0.095663  | C          | -10.676153     | 1.332607  | 3.548649  | C          | -9.316277      | 4.110613  | -0.445812 |
| C          | -7.653649      | 3.588006  | -1.096222  | C          | -9.719194      | 0.382882  | 3.897334  | C          | -8.101763      | 3.794266  | -1.050090 |
| C          | -7.546755      | 2.215076  | -1.334578  | C          | -9.134357      | -0.419307 | 2.915160  | C          | -7.745755      | 2.460791  | -1.267108 |
| C          | -8.294639      | 1.300909  | -0.576343  | C          | -9.506077      | -0.286523 | 1.569704  | C          | -8.612088      | 1.424886  | -0.886261 |
| C          | -7.693954      | -1.013455 | 0.154069   | C          | -8.103949      | -0.567341 | -0.482719 | C          | -8.051120      | -0.855294 | -0.029462 |
| N          | -8.298119      | -0.096143 | -0.835735  | N          | -9.008044      | -1.135712 | 0.541931  | N          | -8.346854      | 0.055183  | -1.158089 |
| C          | -8.181666      | -2.445024 | -0.153109  | C          | -8.011182      | -1.560580 | -1.661585 | C          | -8.202592      | -2.307769 | -0.532193 |
| C          | -7.930265      | -0.495929 | -2.198665  | C          | -8.525900      | -2.445865 | 0.978843  | C          | -7.455611      | -0.212123 | -2.289702 |
| C          | -8.400980      | -1.919644 | -2.478355  | C          | -8.454195      | -3.408765 | -0.200653 | C          | -7.613274      | -1.652964 | -2.763054 |
| N          | -7.817812      | -2.844671 | -1.509543  | N          | -7.558864      | -2.879782 | -1.224232 | N          | -7.327717      | -2.579332 | -1.670179 |
| C          | -8.183687      | -4.227350 | -1.785159  | C          | -7.406823      | -3.798515 | -2.345114 | C          | -7.407707      | -3.969217 | -2.099355 |
| H          | -8.368262      | -0.385838 | 5.493198   | H          | -8.996948      | 4.281451  | -2.743894 | H          | -10.870017     | -0.723876 | 4.600378  |
| H          | -6.417772      | -1.638491 | 4.565340   | H          | -6.723568      | 3.214510  | -2.760068 | H          | -8.568541      | -1.687766 | 4.502304  |
| H          | -6.140254      | -1.828957 | 2.116278   | H          | -5.037569      | -2.351023 | -0.929928 | H          | -7.311698      | -1.640064 | 2.371827  |
| H          | -9.974386      | 0.689933  | 3.946375   | H          | -10.866548     | 3.127918  | -1.602811 | H          | -11.848849     | 0.299990  | 2.569543  |
| H          | -10.706157     | 1.281629  | 1.837825   | H          | -11.753231     | 1.416304  | -0.348706 | H          | -11.750572     | 0.984296  | 0.374733  |
| H          | -10.444107     | 0.088331  | 0.554985   | H          | -11.084932     | -0.198372 | -0.636240 | H          | -10.863716     | -0.077200 | -0.732662 |
| H          | -9.904081      | 3.520563  | 1.443821   | H          | -11.800225     | 2.203421  | 1.928364  | H          | -11.134047     | 3.317911  | 0.400261  |
| H          | -8.583306      | 5.131401  | 0.090998   | H          | -11.133844     | 1.958292  | 4.308947  | H          | -9.594322      | 5.146564  | -0.276378 |
| H          | -7.071365      | 4.278250  | -1.700330  | H          | -9.417660      | 0.264216  | 4.934210  | H          | -7.420439      | 4.584859  | -1.352842 |
| H          | -6.870028      | 1.866970  | -2.107091  | H          | -8.383068      | -1.146889 | 3.202368  | H          | -6.788087      | 2.234856  | -1.724720 |
| H          | -6.600666      | -1.026830 | -0.5001273 | H          | -7.088445      | -0.500163 | -0.049203 | H          | -6.994437      | -0.730757 | 0.264895  |
| H          | -9.275345      | -2.487827 | 0.016371   | H          | -9.000486      | -1.606182 | -2.156915 | H          | -9.268119      | -2.481337 | -0.779431 |
| H          | -7.711307      | -3.136790 | 0.552362   | H          | -7.289855      | -1.172507 | -2.386248 | H          | -7.936415      | -2.990179 | 0.280578  |
| H          | -6.843277      | -0.441337 | -2.371661  | H          | -7.523928      | -2.386683 | 1.441489  | H          | -6.394460      | -0.040437 | -2.049086 |
| H          | -8.419890      | 0.187973  | -2.897513  | H          | -9.220817      | -2.837241 | 1.726591  | H          | -7.727111      | 0.465272  | -3.104156 |
| H          | -8.080416      | -2.213568 | -3.484517  | H          | -8.067572      | -4.375313 | 0.143228  | H          | -6.905105      | -1.840707 | -3.578165 |
| H          | -9.507728      | -1.951386 | -2.454850  | H          | -9.475340      | -3.575782 | -0.594762 | H          | -8.636175      | -1.799277 | -3.161286 |
| H          | -9.273805      | -4.408007 | -1.731138  | H          | -8.350697      | -3.971592 | -2.895155 | H          | -8.406517      | -4.249534 | -2.483501 |
| H          | -7.695014      | -4.890580 | -1.064459  | H          | -6.666630      | -3.406106 | -3.048025 | H          | -7.172606      | -4.629363 | -1.258311 |
| H          | -7.843250      | -4.505268 | -2.787647  | H          | -7.042098      | -4.764200 | -1.981711 | H          | -6.672440      | -4.151976 | -2.889731 |
| <b>CR2</b> |                |           |            | <b>CR2</b> |                |           |           | <b>CR2</b> |                |           |           |
| E          | -5082.89989015 |           |            | E          | -5082.90003218 |           |           | E          | -5082.87835718 |           |           |
| O          | -3.317894      | 2.533513  | 3.471733   | O          | -4.547600      | 2.145499  | 3.560494  | C          | 0.885648       | 5.743256  | -1.840856 |

|   |           |           |           |   |           |           |           |   |           |           |           |
|---|-----------|-----------|-----------|---|-----------|-----------|-----------|---|-----------|-----------|-----------|
| C | -2.901046 | 1.189298  | 3.136070  | C | -3.615803 | 2.644706  | 2.573249  | C | 1.399517  | 5.589245  | -3.276826 |
| C | -3.012090 | 0.355564  | 4.421720  | C | -4.263335 | 3.884488  | 1.939075  | O | 0.316749  | 5.752632  | -4.187569 |
| C | -2.115045 | 0.949855  | 5.510015  | C | -5.585900 | 3.488807  | 1.276839  | C | 2.081342  | 4.238972  | -3.469696 |
| C | -2.441364 | 2.423376  | 5.723449  | C | -6.495902 | 2.780218  | 2.274377  | O | 2.631474  | 4.238510  | -4.773414 |
| C | -2.453276 | 3.177219  | 4.387522  | C | -5.745358 | 1.650645  | 2.992953  | C | 3.136049  | 3.980915  | -2.386230 |
| H | -1.854717 | 1.202529  | 2.812197  | H | -3.475969 | 1.889517  | 1.792039  | O | 3.513801  | 2.610714  | -2.547264 |
| H | -4.055543 | 0.357255  | 4.767235  | H | -4.450501 | 4.639005  | 2.715920  | C | 2.520984  | 4.220720  | -1.000816 |
| H | -1.073860 | 0.872224  | 5.159529  | H | -5.348538 | 2.784096  | 0.464360  | O | 1.965974  | 5.546582  | -0.950779 |
| H | -3.455338 | 2.488254  | 6.145211  | H | -6.794362 | 3.512085  | 3.039708  | C | 3.457026  | 4.114856  | 0.189663  |
| H | -2.863536 | 4.184172  | 4.522973  | H | -6.338362 | 1.274329  | 3.833972  | O | 2.629781  | 4.146876  | 1.341200  |
| C | -3.753397 | 0.720542  | 1.942657  | C | -2.256466 | 2.845691  | 3.265050  | C | 4.874377  | 2.249072  | -2.580357 |
| O | -2.558941 | -0.985714 | 4.241314  | O | -3.465483 | 4.440596  | 0.895663  | C | 5.136481  | 1.434052  | -3.854756 |
| O | -2.279471 | 0.299592  | 6.757017  | O | -6.295424 | 4.609467  | 0.781652  | O | 4.722753  | 2.188698  | -4.991550 |
| O | -1.507385 | 3.050335  | 6.595685  | O | -7.647901 | 2.233822  | 1.642246  | C | 4.419468  | 0.089656  | -3.798719 |
| O | -1.138696 | 3.239687  | 3.898959  | O | -5.489300 | 0.624992  | 2.069098  | O | 4.819231  | -0.632929 | -4.948712 |
| H | -4.301081 | -0.190343 | 2.189814  | H | -1.913507 | 3.876628  | 3.163286  | C | 4.764593  | -0.627691 | -2.496025 |
| O | -2.967526 | 0.405400  | 0.799061  | O | -1.239417 | 2.032227  | 2.684980  | O | 3.973503  | -1.818899 | -2.444158 |
| H | -4.481641 | 1.510468  | 1.717989  | H | -2.380541 | 2.623973  | 4.332538  | C | 4.461855  | 0.273599  | -1.295949 |
| H | -2.182584 | -0.660541 | 6.614294  | H | -5.692687 | 5.118723  | 0.208285  | O | 5.230518  | 1.489707  | -1.442146 |
| H | -1.404649 | 2.452867  | 7.351372  | H | -7.997332 | 2.934618  | 1.071788  | C | 4.796752  | -0.358790 | 0.061377  |
| H | -2.503614 | 1.217373  | 0.495813  | H | -1.474392 | 1.085647  | 2.817503  | O | 5.935222  | -1.203250 | 0.063302  |
| O | 0.044297  | 5.587684  | 1.322672  | O | -4.595121 | -2.834049 | 2.965777  | C | 4.633305  | -3.055590 | -2.348836 |
| C | -0.482458 | 4.321248  | 1.785240  | C | -4.294621 | -1.458999 | 2.630792  | C | 4.019186  | -4.024966 | -3.358512 |
| C | -0.686682 | 4.454265  | 3.302325  | C | -5.641153 | -0.731635 | 2.484594  | O | 4.139224  | -3.469868 | -4.665754 |
| C | 0.647836  | 4.771533  | 3.981570  | C | -6.469448 | -1.396809 | 1.382094  | C | 2.563826  | -4.309262 | -3.012900 |
| C | 1.284928  | 6.007071  | 3.356993  | C | -6.621831 | -2.889574 | 1.647775  | O | 2.107808  | -5.266509 | -3.949353 |
| C | 1.332488  | 5.877939  | 1.828933  | C | -5.258300 | -3.539355 | 1.931008  | C | 2.453310  | -4.790980 | -1.567950 |
| H | 0.252624  | 3.531398  | 1.596790  | H | -3.775064 | -1.424134 | 1.666690  | O | 1.057636  | -4.825126 | -1.256216 |
| H | -1.402790 | 5.263310  | 3.504137  | H | -6.189304 | -0.776879 | 3.436160  | C | 3.171936  | -3.833447 | -0.598928 |
| H | 1.316845  | 3.913467  | 3.811526  | H | -5.920168 | -1.268496 | 0.436128  | O | 4.531109  | -3.595282 | -1.038110 |
| H | 0.649983  | 6.873740  | 3.593567  | H | -7.236020 | -3.012932 | 2.552141  | C | 3.222585  | -4.362959 | 0.824311  |
| H | 1.621080  | 6.832447  | 1.374649  | H | -5.391284 | -4.555750 | 2.303567  | O | 3.739583  | -5.690083 | 0.811438  |
| C | -1.734230 | 3.996923  | 0.948401  | C | -3.327419 | -0.923031 | 3.701208  | C | 0.514229  | -5.976665 | -0.641314 |
| O | 0.498761  | 5.029287  | 5.366041  | O | -7.772288 | -0.850383 | 1.287598  | C | -0.572111 | -6.563672 | -1.552662 |
| O | 2.606488  | 6.221545  | 3.840852  | O | -7.227146 | -3.561549 | 0.548843  | O | -0.027447 | -6.837739 | -2.842305 |
| O | 2.255335  | 4.872746  | 1.497454  | O | -4.505362 | -3.533085 | 0.746257  | C | -1.757093 | -5.612247 | -1.659367 |
| H | -2.606315 | 3.864466  | 1.591268  | H | -3.711427 | -0.004268 | 4.147379  | O | -2.738202 | -6.276656 | -2.438112 |
| O | -1.598241 | 2.785464  | 0.215225  | O | -2.047873 | -0.594323 | 3.166604  | C | -2.251010 | -5.246849 | -0.262795 |
| H | -1.923396 | 4.847780  | 0.280823  | H | -3.242859 | -1.682109 | 4.489454  | O | -3.292565 | -4.270966 | -0.408482 |
| H | 0.013172  | 4.281811  | 5.762202  | H | -7.687742 | 0.118026  | 1.210029  | C | -1.104631 | -4.683819 | 0.583797  |
| H | 2.556951  | 6.122233  | 4.803353  | H | -7.993822 | -3.025437 | 0.296943  | O | -0.041122 | -5.664638 | 0.618331  |
| H | -0.878453 | 2.892327  | -0.444201 | H | -1.646006 | -1.397220 | 2.761064  | C | -1.508175 | -4.365636 | 2.032438  |
| O | 3.793390  | 4.431077  | -1.818036 | O | -1.573874 | -5.673469 | 0.120116  | O | -2.489636 | -5.238492 | 2.566533  |
| C | 2.783999  | 4.191946  | -0.808609 | C | -2.228088 | -4.461255 | 0.563493  | C | -4.593812 | -4.647898 | -0.048191 |
| C | 3.135216  | 5.080774  | 0.394432  | C | -3.740843 | -4.692473 | 0.417091  | C | -5.579822 | -4.199209 | -1.129741 |
| C | 4.528926  | 4.722162  | 0.916058  | C | -4.083437 | -5.002303 | -1.042199 | O | -5.204798 | -4.765740 | -2.380275 |
| C | 5.558191  | 4.800262  | -0.204933 | C | -3.250205 | -6.172213 | -1.550764 | C | -5.633774 | -2.678647 | -1.215089 |
| C | 5.086148  | 4.008522  | -1.431543 | C | -1.761997 | -5.947333 | -1.254549 | O | -6.628340 | -2.367508 | -2.169899 |
| H | 2.827660  | 3.144120  | -0.491940 | H | -1.934117 | -3.629815 | -0.086600 | C | -5.917214 | -2.061675 | 0.158945  |
| H | 3.116887  | 6.136501  | 0.089057  | H | -4.044179 | -5.536913 | 1.051956  | O | -5.723960 | -0.652395 | 0.018863  |

|   |          |           |           |   |           |           |           |   |           |           |           |
|---|----------|-----------|-----------|---|-----------|-----------|-----------|---|-----------|-----------|-----------|
| H | 4.487607 | 3.682021  | 1.275666  | H | -3.829548 | -4.111066 | -1.637281 | C | -4.945643 | -2.629721 | 1.209297  |
| H | 5.649956 | 5.853210  | -0.510046 | H | -3.560867 | -7.074357 | -1.003132 | O | -4.980740 | -4.068173 | 1.189461  |
| H | 5.734491 | 4.215504  | -2.290328 | H | -1.192738 | -6.862165 | -1.453636 | C | -5.266446 | -2.222501 | 2.634850  |
| C | 1.406967 | 4.423776  | -1.457492 | C | -1.716174 | -4.150406 | 1.982392  | O | -4.169173 | -2.638990 | 3.450786  |
| O | 4.958533 | 5.595449  | 1.944532  | O | -5.445179 | -5.351978 | -1.210754 | C | -6.752199 | 0.242500  | 0.390514  |
| O | 6.824999 | 4.297085  | 0.205730  | O | -3.414891 | -6.368483 | -2.950917 | C | -7.094775 | 1.145675  | -0.800028 |
| O | 5.107237 | 2.640204  | -1.114541 | O | -1.300874 | -4.892713 | -2.058525 | O | -7.488086 | 0.344416  | -1.913116 |
| H | 0.835512 | 5.167426  | -0.899481 | H | -2.547925 | -4.061790 | 2.683535  | C | -5.912624 | 2.034444  | -1.161928 |
| O | 0.607397 | 3.247033  | -1.473741 | O | -1.011847 | -2.916245 | 2.056647  | O | -6.347682 | 2.889979  | -2.202659 |
| H | 1.573781 | 4.806277  | -2.473270 | H | -1.082456 | -4.988077 | 2.301837  | C | -5.434882 | 2.800256  | 0.066881  |
| H | 4.260787 | 5.625804  | 2.625543  | H | -5.989871 | -4.655012 | -0.799821 | O | -4.213269 | 3.434655  | -0.316220 |
| H | 7.003362 | 4.697250  | 1.069895  | H | -4.369023 | -6.332341 | -3.115244 | C | -5.195740 | 1.850857  | 1.254551  |
| H | 1.065412 | 2.558693  | -2.003256 | H | -0.222536 | -2.952425 | 1.471173  | O | -6.363569 | 1.036330  | 1.489708  |
| O | 5.098382 | -0.092810 | -3.583088 | O | 2.238699  | -4.233361 | -2.822082 | C | -4.871809 | 2.587943  | 2.544052  |
| C | 4.471385 | 0.855055  | -2.687241 | C | 1.018479  | -4.061489 | -2.062951 | O | -5.852943 | 3.594751  | 2.771740  |
| C | 5.593503 | 1.715649  | -2.085635 | C | -0.020628 | -5.012129 | -2.676801 | C | -3.987978 | 4.779873  | 0.056259  |
| C | 6.587218 | 0.824789  | -1.336003 | C | -0.242458 | -4.657042 | -4.149313 | C | -3.779787 | 5.619777  | -1.211694 |
| C | 7.106809 | -0.281178 | -2.246525 | C | 1.081676  | -4.653134 | -4.904509 | O | -4.889099 | 5.436166  | -2.090642 |
| C | 5.944958 | -1.016447 | -2.927100 | C | 2.126295  | -3.806383 | -4.165900 | C | -2.474382 | 5.247763  | -1.903587 |
| H | 3.973365 | 0.313401  | -1.875351 | H | 0.662007  | -3.031884 | -2.175543 | O | -2.314294 | 6.151938  | -2.983743 |
| H | 6.115838 | 2.251879  | -2.890482 | H | 0.341112  | -6.047091 | -2.599075 | C | -1.311680 | 5.287982  | -0.911500 |
| H | 6.045038 | 0.358130  | -0.498595 | H | -0.663429 | -3.639883 | -4.183394 | O | -0.150659 | 4.822596  | -1.608880 |
| H | 7.707799 | 0.186713  | -3.040357 | H | 1.458690  | -5.686227 | -4.933715 | C | -1.633821 | 4.392522  | 0.290925  |
| H | 6.323754 | -1.678714 | -3.713513 | H | 3.118178  | -3.954184 | -4.607553 | O | -2.855364 | 4.884468  | 0.891819  |
| C | 3.388239 | 1.601630  | -3.487183 | C | 1.353898  | -4.272899 | -0.574978 | C | -0.552758 | 4.329163  | 1.373120  |
| O | 7.710945 | 1.548991  | -0.869924 | O | -1.095678 | -5.579204 | -4.802421 | O | 0.108274  | 5.555409  | 1.627209  |
| O | 7.892378 | -1.228649 | -1.531564 | O | 0.934021  | -4.147642 | -6.227005 | H | 0.540359  | 6.766934  | -1.665995 |
| O | 5.249519 | -1.752650 | -1.953815 | O | 1.743857  | -2.457870 | -4.247689 | H | 2.148241  | 6.378442  | -3.438858 |
| H | 3.547520 | 2.680419  | -3.446811 | H | 0.745643  | -5.073743 | -0.150662 | H | 0.639740  | 5.448190  | -5.048786 |
| O | 2.078919 | 1.381755  | -2.970488 | O | 1.083953  | -3.117892 | 0.210546  | H | 1.316239  | 3.453873  | -3.364022 |
| H | 3.460397 | 1.278759  | -4.533917 | H | 2.409488  | -4.566049 | -0.504239 | H | 3.186432  | 3.440571  | -4.874700 |
| H | 7.386890 | 2.319919  | -0.367673 | H | -1.911974 | -5.662340 | -4.274901 | H | 4.000308  | 4.639770  | -2.548559 |
| H | 8.502143 | -0.711404 | -0.984461 | H | 0.156315  | -4.591513 | -6.596891 | H | 1.721521  | 3.483536  | -0.859450 |
| H | 1.884972 | 0.417770  | -2.979937 | H | 1.681802  | -2.390539 | -0.069203 | H | 4.163650  | 4.959448  | 0.170693  |
| O | 2.969383 | -4.548602 | -2.679277 | O | 3.974225  | 0.407328  | -3.633233 | H | 4.031392  | 3.181959  | 0.118992  |
| C | 3.282315 | -3.161888 | -2.411831 | C | 3.014279  | -0.603094 | -3.241782 | H | 3.134787  | 4.025825  | 2.182792  |
| C | 4.809546 | -3.070195 | -2.277941 | C | 2.745946  | -1.470084 | -4.482038 | H | 5.511612  | 3.140013  | -2.556958 |
| C | 5.275370 | -3.956730 | -1.119519 | C | 2.196557  | -0.599835 | -5.614729 | H | 6.217883  | 1.242635  | -3.908387 |
| C | 4.773040 | -5.385241 | -1.301086 | C | 3.132600  | 0.568931  | -5.895887 | H | 4.738810  | 1.565287  | -5.734295 |
| C | 3.266403 | -5.403775 | -1.592114 | C | 3.477544  | 1.312836  | -4.598815 | H | 3.333707  | 0.273256  | -3.806934 |
| H | 2.833380 | -2.867071 | -1.456974 | H | 2.076960  | -0.119585 | -2.945164 | H | 4.430104  | -1.528145 | -4.906281 |
| H | 5.279844 | -3.407246 | -3.212282 | H | 3.681108  | -1.948747 | -4.805381 | H | 5.830745  | -0.880287 | -2.477995 |
| H | 4.834644 | -3.549586 | -0.195861 | H | 1.229104  | -0.194891 | -5.278565 | H | 3.396072  | 0.535779  | -1.295649 |
| H | 5.279792 | -5.812427 | -2.179221 | H | 4.071693  | 0.163666  | -6.300972 | H | 3.909334  | -0.893689 | 0.420671  |
| H | 2.952275 | -6.404746 | -1.908206 | H | 4.286891  | 2.029862  | -4.776496 | H | 4.984658  | 0.461876  | 0.761635  |
| C | 2.624316 | -2.310264 | -3.511519 | C | 3.576517  | -1.328421 | -2.006680 | H | 5.617228  | -2.105790 | -0.106198 |
| O | 6.686439 | -4.016744 | -1.022152 | O | 2.048906  | -1.322184 | -6.823662 | H | 5.706224  | -2.938467 | -2.531962 |
| O | 5.025952 | -6.184798 | -0.151364 | O | 2.560669  | 1.492196  | -6.816374 | H | 4.580886  | -4.968033 | -3.299056 |
| O | 2.580988 | -5.013487 | -0.430513 | O | 2.325275  | 1.971491  | -4.140002 | H | 3.552849  | -3.998103 | -5.228898 |
| H | 3.368258 | -1.718993 | -4.048318 | H | 3.594843  | -2.407374 | -2.168300 | H | 1.995981  | -3.369867 | -3.100226 |

|   |           |           |           |   |           |           |           |   |           |           |           |
|---|-----------|-----------|-----------|---|-----------|-----------|-----------|---|-----------|-----------|-----------|
| O | 1.690913  | -1.376458 | -2.975510 | O | 2.785326  | -1.122345 | -0.841676 | H | 1.276820  | -5.661994 | -3.618002 |
| H | 2.140774  | -2.990136 | -4.224486 | H | 4.607839  | -0.985396 | -1.853292 | H | 2.892466  | -5.790167 | -1.481137 |
| H | 7.026849  | -3.102978 | -0.996881 | H | 1.527083  | -2.124025 | -6.633709 | H | 2.627957  | -2.880324 | -0.590220 |
| H | 5.948244  | -6.017329 | 0.093386  | H | 2.203064  | 0.958396  | -7.541597 | H | 2.200564  | -4.339754 | 1.223750  |
| H | 0.971734  | -1.866697 | -2.516936 | H | 2.766258  | -0.164053 | -0.629388 | H | 3.848072  | -3.692412 | 1.430870  |
| O | -1.000001 | -5.601760 | 0.193383  | O | 2.314200  | 4.776021  | -1.753011 | H | 3.651276  | -6.047434 | 1.703411  |
| C | 0.126342  | -4.820379 | -0.269495 | C | 2.267659  | 3.376695  | -2.118301 | H | 1.302772  | -6.709082 | -0.443764 |
| C | 1.376910  | -5.694636 | -0.081333 | C | 2.444096  | 3.303438  | -3.643636 | H | -0.920802 | -7.499670 | -1.093156 |
| C | 1.534237  | -6.054713 | 1.398831  | C | 1.335329  | 4.096107  | -4.339656 | H | -0.796299 | -7.011621 | -3.408411 |
| C | 0.264549  | -6.705946 | 1.934406  | C | 1.288424  | 5.524670  | -3.812087 | H | -1.420725 | -4.689935 | -2.156897 |
| C | -0.968500 | -5.862901 | 1.583352  | C | 1.243090  | 5.534687  | -2.278916 | H | -3.501411 | -5.679093 | -2.555459 |
| H | 0.231331  | -3.926165 | 0.354904  | H | 1.287071  | 2.963583  | -1.857142 | H | -2.640015 | -6.135419 | 0.245292  |
| H | 1.275590  | -6.613293 | -0.676007 | H | 3.421838  | 3.723712  | -3.918817 | H | -0.716823 | -3.768064 | 0.118883  |
| H | 1.699124  | -5.115124 | 1.949228  | H | 0.378593  | 3.606270  | -4.099660 | H | -1.843640 | -3.324982 | 2.082487  |
| H | 0.146892  | -7.680419 | 1.437557  | H | 2.216661  | 6.030619  | -4.116281 | H | -0.600587 | -4.445145 | 2.642705  |
| H | -1.885992 | -6.421076 | 1.800653  | H | 1.389256  | 6.552697  | -1.900946 | H | -3.335018 | -4.763295 | 2.536986  |
| C | -0.189497 | -4.350241 | -1.700569 | C | 3.328842  | 2.645581  | -1.275806 | H | -4.658441 | -5.729153 | 0.106420  |
| O | 2.598567  | -6.962120 | 1.619061  | O | 1.527899  | 4.171537  | -5.740248 | H | -6.575290 | -4.564302 | -0.837205 |
| O | 0.314652  | -6.877667 | 3.346257  | O | 0.158943  | 6.234270  | -4.309567 | H | -5.703123 | -4.277530 | -3.053449 |
| O | -0.924194 | -4.673300 | 2.327138  | O | 0.000767  | 5.026985  | -1.865641 | H | -4.645045 | -2.316676 | -1.537130 |
| H | 0.608440  | -4.637723 | -2.387217 | H | 4.025535  | 2.103665  | -1.917506 | H | -6.772861 | -1.399841 | -2.175280 |
| O | -0.298990 | -2.932636 | -1.797914 | O | 2.767465  | 1.670331  | -0.402198 | H | -6.955927 | -2.279586 | 0.444964  |
| H | -1.116584 | -4.841775 | -2.022088 | H | 3.891813  | 3.402431  | -0.714565 | H | -3.934654 | -2.282495 | 0.962309  |
| H | 3.400516  | -6.591713 | 1.205919  | H | 1.666406  | 3.266347  | -6.076679 | H | -6.197237 | -2.719291 | 2.942297  |
| H | 1.182077  | -7.264373 | 3.537778  | H | 0.128461  | 6.054375  | -5.261127 | H | -5.415456 | -1.136324 | 2.681432  |
| H | -1.050704 | -2.618764 | -1.245994 | H | 2.135857  | 2.111431  | 0.208094  | H | -4.458486 | -2.662073 | 4.370884  |
| O | -3.801380 | -2.449967 | 2.921631  | O | -1.479777 | 5.519272  | 1.467515  | H | -7.639158 | -0.310014 | 0.719964  |
| C | -2.645321 | -2.914980 | 2.186075  | C | -0.707303 | 4.796763  | 0.479923  | H | -7.931805 | 1.788481  | -0.493429 |
| C | -2.130468 | -4.173977 | 2.903212  | C | -0.675464 | 5.667251  | -0.785487 | H | -7.499945 | 0.945871  | -2.674000 |
| C | -1.772432 | -3.840829 | 4.353168  | C | -2.101754 | 5.916240  | -1.282590 | H | -5.085757 | 1.391406  | -1.502073 |
| C | -2.954313 | -3.193043 | 5.062468  | C | -2.957499 | 6.512684  | -0.171301 | H | -5.729927 | 3.645175  | -2.264330 |
| C | -3.505241 | -2.022584 | 4.237269  | C | -2.839549 | 5.679170  | 1.111079  | H | -6.186002 | 3.546074  | 0.347006  |
| H | -1.860905 | -2.150319 | 2.216591  | H | -1.212573 | 3.853816  | 0.243395  | H | -4.345412 | 1.198806  | 1.014045  |
| H | -2.907667 | -4.951012 | 2.885948  | H | -0.194683 | 6.628300  | -0.554680 | H | -3.871949 | 3.027128  | 2.436694  |
| H | -0.943575 | -3.116110 | 4.329692  | H | -2.528971 | 4.940782  | -1.563491 | H | -4.848475 | 1.855967  | 3.364612  |
| H | -3.755427 | -3.942396 | 5.145349  | H | -2.569784 | 7.517329  | 0.053864  | H | -5.545167 | 4.146672  | 3.501067  |
| H | -4.457296 | -1.678241 | 4.656222  | H | -3.304669 | 6.206016  | 1.951702  | H | -4.829455 | 5.155798  | 0.645801  |
| C | -3.075841 | -3.096708 | 0.720366  | C | 0.654398  | 4.452635  | 1.112431  | H | -3.718661 | 6.674136  | -0.905502 |
| O | -1.415427 | -4.993321 | 5.094438  | O | -2.140823 | 6.818486  | -2.372808 | H | -4.615588 | 5.839346  | -2.929639 |
| O | -2.595468 | -2.715385 | 6.354484  | O | -4.329148 | 6.589013  | -0.543479 | H | -2.561238 | 4.213723  | -2.271628 |
| H | -2.794863 | -4.086187 | 0.356510  | H | 1.474498  | 4.874135  | 0.528406  | H | -1.512821 | 5.900606  | -3.481430 |
| O | -2.455269 | -2.168861 | -0.165122 | O | 0.891387  | 3.048845  | 1.163148  | H | -1.149420 | 6.307279  | -0.544716 |
| H | -4.169600 | -3.013675 | 0.677894  | H | 0.680175  | 4.895594  | 2.116573  | H | -1.811743 | 3.366375  | -0.057332 |
| H | -0.723005 | -5.468463 | 4.598610  | H | -1.524393 | 6.495296  | -3.056472 | H | 0.173961  | 3.565333  | 1.080627  |
| H | -2.097608 | -3.432231 | 6.775261  | H | -4.342939 | 6.967439  | -1.435280 | H | -1.048473 | 3.981315  | 2.290374  |
| H | -2.632348 | -1.249051 | 0.136878  | H | 0.179730  | 2.626573  | 1.691918  | H | 1.026396  | 5.427821  | 1.328823  |
| C | -1.336639 | 1.199143  | -3.917993 | C | 1.379515  | -0.906605 | 4.142251  | C | -1.072981 | -0.865557 | 3.931552  |
| C | -1.636796 | -0.134543 | -3.643506 | C | 1.688089  | 0.363103  | 3.656287  | C | -0.832981 | 0.032952  | 2.892535  |
| C | -2.964982 | -0.516941 | -3.467686 | C | 3.016787  | 0.696480  | 3.401826  | C | 0.376434  | 0.722262  | 2.843720  |
| C | -4.017032 | 0.404456  | -3.566472 | C | 4.060650  | -0.211361 | 3.628163  | C | 1.365234  | 0.543239  | 3.821188  |

|            |                |           |            |            |                |           |           |            |                |           |           |
|------------|----------------|-----------|------------|------------|----------------|-----------|-----------|------------|----------------|-----------|-----------|
| C          | -3.713971      | 1.744994  | -3.870483  | C          | 3.749882       | -1.481065 | 4.150720  | C          | 1.135279       | -0.382529 | 4.856218  |
| C          | -2.375582      | 2.120659  | -4.036243  | C          | 2.410928       | -1.809272 | 4.394306  | C          | -0.083354      | -1.072095 | 4.892313  |
| C          | -4.817662      | 2.752844  | -4.131261  | C          | 4.849273       | -2.443780 | 4.558641  | C          | 2.229265       | -0.723131 | 5.851751  |
| C          | -5.667363      | 2.289649  | -5.290548  | C          | 5.719254       | -1.804321 | 5.614654  | C          | 3.437076       | -1.254309 | 5.115721  |
| C          | -5.632516      | 2.908141  | -6.539100  | C          | 5.697628       | -2.207798 | 6.948528  | C          | 3.799538       | -2.600060 | 5.148337  |
| C          | -6.426813      | 2.452707  | -7.594645  | C          | 6.511033       | -1.592755 | 7.903870  | C          | 4.907326       | -3.067474 | 4.435381  |
| C          | -7.260839      | 1.355064  | -7.396861  | C          | 7.351106       | -0.551700 | 7.516614  | C          | 5.656059       | -2.174923 | 3.670904  |
| C          | -7.296968      | 0.713908  | -6.156817  | C          | 7.374288       | -0.124313 | 6.187396  | C          | 5.302684       | -0.824315 | 3.623002  |
| C          | -6.504062      | 1.168953  | -5.093423  | C          | 6.562180       | -0.740230 | 5.224226  | C          | 4.194181       | -0.350924 | 4.338100  |
| C          | -5.410792      | -0.126237 | -3.241441  | C          | 5.452788       | 0.236983  | 3.193705  | C          | 2.583879       | 1.456190  | 3.711986  |
| N          | -6.571614      | 0.614249  | -3.788251  | N          | 6.615562       | -0.409600 | 3.845146  | N          | 3.830081       | 1.024828  | 4.382892  |
| C          | -5.572405      | -0.207981 | -1.707862  | C          | 5.589536       | 0.045354  | 1.667371  | C          | 2.206339       | 2.850991  | 4.252414  |
| C          | -7.818985      | -0.059022 | -3.432786  | C          | 7.862328       | 0.180004  | 3.363145  | C          | 4.902825       | 1.985060  | 4.129355  |
| C          | -7.962474      | -0.134898 | -1.916074  | C          | 7.984467       | -0.012559 | 1.854808  | C          | 4.520029       | 3.368444  | 4.650182  |
| N          | -6.831649      | -0.849285 | -1.337307  | N          | 6.849565       | 0.596110  | 1.172202  | N          | 3.280170       | 3.825579  | 4.015499  |
| C          | -6.965178      | -0.996864 | 0.102646   | C          | 6.963133       | 0.476879  | -0.272009 | C          | 2.883580       | 5.166610  | 4.456440  |
| H          | -0.305303      | 1.515202  | -4.042237  | H          | 0.346204       | -1.183495 | 4.325640  | H          | -2.011134      | -1.411392 | 3.974065  |
| H          | -0.846667      | -0.874021 | -3.572056  | H          | 0.902498       | 1.091406  | 3.484590  | H          | -1.579128      | 0.192239  | 2.119199  |
| H          | -3.190855      | -1.554938 | -3.236343  | H          | 3.248024       | 1.683905  | 3.009680  | H          | 0.563561       | 1.420946  | 2.032313  |
| H          | -2.149678      | 3.157871  | -4.271082  | H          | 2.179495       | -2.791740 | 4.798468  | H          | -0.250131      | -1.793742 | 5.688214  |
| H          | -4.379927      | 3.731839  | -4.347234  | H          | 4.407337       | -3.369564 | 4.938519  | H          | -1.465479      | -1.465479 | 6.565411  |
| H          | -5.455994      | 2.856722  | -3.244996  | H          | 5.474043       | -2.698172 | 3.693345  | H          | 2.522048       | 0.170496  | 6.416609  |
| H          | -4.984603      | 3.769639  | -6.681502  | H          | 5.044987       | -3.027225 | 7.239817  | H          | 3.213562       | -3.288628 | 5.752156  |
| H          | -6.394942      | 2.954180  | -8.557314  | H          | 6.489141       | -1.928098 | 8.936461  | H          | 5.184648       | -4.116411 | 4.484866  |
| H          | -7.882948      | 0.986734  | -8.207871  | H          | 7.988019       | -0.061177 | 8.247460  | H          | 6.512708       | -2.518495 | 3.099392  |
| H          | -7.941931      | -0.147788 | -6.021763  | H          | 8.024067       | 0.696564  | 5.903209  | H          | 5.893145       | -0.150632 | 3.012810  |
| H          | -5.454349      | -1.164907 | -3.616555  | H          | 5.512701       | 1.324873  | 3.378984  | H          | 2.788314       | 1.587080  | 2.633679  |
| H          | -5.487760      | 0.816181  | -1.294429  | H          | 5.488376       | -1.034809 | 1.442717  | H          | 1.973036       | 2.764660  | 5.328286  |
| H          | -4.745131      | -0.792448 | -1.295676  | H          | 4.763675       | 0.561964  | 1.169131  | H          | 1.308620       | 3.203739  | 3.739543  |
| H          | -7.870579      | -1.083903 | -3.842894  | H          | 7.926593       | 1.260149  | 3.587746  | H          | 5.142812       | 2.068126  | 3.053118  |
| H          | -8.652647      | 0.514040  | -3.847459  | H          | 8.697868       | -0.319594 | 3.860694  | H          | 5.804186       | 1.643265  | 4.644685  |
| H          | -8.885774      | -0.671546 | -1.1665886 | H          | 8.906861       | 0.464740  | 1.501738  | H          | 5.319066       | 4.081381  | 4.418195  |
| H          | -8.052505      | 0.893530  | -1.512703  | H          | 8.064064       | -1.096591 | 1.637929  | H          | 4.410399       | 3.326641  | 5.748336  |
| H          | -6.992544      | -0.029354 | 0.641522   | H          | 7.007277       | -0.573911 | -0.621039 | H          | 2.664955       | 5.206833  | 5.536598  |
| H          | -6.125823      | -1.577076 | 0.498921   | H          | 6.103634       | 0.952810  | -0.753488 | H          | 1.992665       | 5.478499  | 3.903593  |
| H          | -7.889919      | -1.536291 | 0.334483   | H          | 7.871802       | 0.982394  | -0.616700 | H          | 3.690146       | 5.874077  | 4.241915  |
| <b>NR2</b> |                |           |            | <b>NR2</b> |                |           |           | <b>NR2</b> |                |           |           |
| E          | -5082.90212451 |           |            | E          | -5082.90014023 |           |           | E          | -5082.86536272 |           |           |
| O          | 5.440968       | 1.990133  | 2.065081   | O          | -3.600556      | 1.418589  | 3.752336  | C          | -1.324349      | -6.239363 | -0.314768 |
| C          | 4.901635       | 0.722633  | 1.620150   | C          | -2.999874      | 0.203554  | 3.246925  | C          | -2.270024      | -6.386635 | -1.509965 |
| C          | 6.060532       | -0.053014 | 0.974800   | C          | -2.965043      | -0.796403 | 4.413748  | O          | -1.520804      | -6.749358 | -2.664580 |
| C          | 6.627058       | 0.745180  | -0.202193  | C          | -2.150253      | -0.219766 | 5.573866  | C          | -3.043538      | -5.095849 | -1.747149 |
| C          | 7.019750       | 2.149894  | 0.239265   | C          | -2.688995      | 1.147537  | 5.976374  | O          | -3.947526      | -5.354693 | -2.802598 |
| C          | 5.871017       | 2.820214  | 1.004518   | C          | -2.827929      | 2.058314  | 4.749792  | C          | -3.746802      | -4.631218 | -0.468321 |
| H          | 4.134938       | 0.900833  | 0.858285   | H          | -1.972485      | 0.409691  | 2.927174  | O          | -4.232185      | -3.314711 | -0.738853 |
| H          | 6.850589       | -0.221212 | 1.720214   | H          | -3.991316      | -0.997173 | 4.752374  | C          | -2.755938      | -4.599715 | 0.709202  |
| H          | 5.828202       | 0.830601  | -0.955545  | H          | -1.114701      | -0.094282 | 5.220766  | O          | -2.088386      | -5.871197 | 0.827420  |
| H          | 7.869093       | 2.063695  | 0.933089   | H          | -3.696215      | 1.005984  | 6.395540  | C          | -3.404174      | -4.327293 | 2.053759  |
| H          | 6.217236       | 3.747427  | 1.474802   | H          | -3.380496      | 2.967303  | 5.012343  | O          | -2.358403      | -4.023842 | 2.978718  |
| C          | 4.210766       | 0.056018  | 2.823681   | C          | -3.801797      | -0.226336 | 2.005188  | C          | -5.588265      | -2.997296 | -0.507467 |



|   |           |           |           |   |           |           |           |   |           |           |           |
|---|-----------|-----------|-----------|---|-----------|-----------|-----------|---|-----------|-----------|-----------|
| O | 5.638604  | -1.296136 | 0.416817  | O | -2.316851 | -2.019094 | 4.065129  | C | -6.201044 | -2.438352 | -1.798278 |
| O | 7.780807  | 0.139416  | -0.756178 | O | -2.196653 | -1.044607 | 6.723867  | O | -6.033208 | -3.378668 | -2.857039 |
| O | 7.373352  | 2.971181  | -0.868538 | O | -1.847509 | 1.786721  | 6.930021  | C | -5.580109 | -1.094195 | -2.158395 |
| O | 4.827290  | 3.083335  | 0.102005  | O | -1.543711 | 2.377023  | 4.281725  | O | -6.283464 | -0.617242 | -3.290106 |
| H | 4.607836  | -0.946607 | 2.990787  | H | -4.177978 | -1.244447 | 2.118722  | C | -5.665206 | -0.151323 | -0.961299 |
| O | 2.810989  | -0.105098 | 2.626859  | O | -3.015852 | -0.234225 | 0.816878  | O | -4.964167 | 1.045426  | -1.312914 |
| H | 4.420951  | 0.663610  | 3.713737  | H | -4.659105 | 0.451852  | 1.906952  | C | -5.037676 | -0.798891 | 0.277261  |
| H | 7.566350  | -0.790941 | -0.955997 | H | -1.955102 | -1.951131 | 6.456924  | O | -5.719336 | -2.051375 | 0.532306  |
| H | 7.972380  | 2.439474  | -1.413695 | H | -1.646131 | 1.116915  | 7.600429  | C | -5.126825 | 0.068458  | 1.544232  |
| H | 2.394585  | 0.780512  | 2.550542  | H | -2.677894 | 0.673816  | 0.642474  | O | -6.260974 | 0.915133  | 1.609680  |
| O | 2.091277  | 5.478717  | 0.690798  | O | -0.751597 | 5.204013  | 2.062055  | C | -5.662164 | 2.265160  | -1.277117 |
| C | 2.715478  | 4.174431  | 0.747792  | C | -1.077160 | 3.822015  | 2.342282  | C | -5.403990 | 3.030097  | -2.575030 |
| C | 4.138256  | 4.329197  | 0.186838  | C | -1.281570 | 3.715214  | 3.861217  | O | -5.813034 | 2.225935  | -3.678796 |
| C | 4.079043  | 4.854051  | -1.249700 | C | -0.001701 | 4.132245  | 4.589906  | C | -3.936336 | 3.418026  | -2.692770 |
| C | 3.267371  | 6.141597  | -1.316837 | C | 0.436662  | 5.522440  | 4.144832  | O | -3.818640 | 4.182293  | -3.877207 |
| C | 1.909859  | 5.964470  | -0.624450 | C | 0.485480  | 5.611057  | 2.613985  | C | -3.496401 | 4.179094  | -1.444288 |
| H | 2.162503  | 3.477179  | 0.108327  | H | -0.234669 | 3.184273  | 2.054028  | O | -2.077407 | 4.327825  | -1.535321 |
| H | 4.705058  | 5.033673  | 0.811906  | H | -2.107247 | 4.374249  | 4.164494  | C | -3.853713 | 3.402592  | -0.163214 |
| H | 3.568841  | 4.091054  | -1.858386 | H | 0.785934  | 3.414832  | 4.311181  | O | -5.259742 | 3.054170  | -0.166103 |
| H | 3.816807  | 6.919596  | -0.766352 | H | -0.318036 | 6.243958  | 4.491381  | C | -3.564388 | 4.190407  | 1.103200  |
| H | 1.411391  | 6.933972  | -0.514353 | H | 0.623404  | 6.650752  | 2.296607  | O | -4.172257 | 5.474472  | 1.005633  |
| C | 2.604165  | 3.674634  | 2.199217  | C | -2.275949 | 3.430542  | 1.457861  | C | -1.500091 | 5.598258  | -1.302661 |
| O | 5.364892  | 5.138745  | -1.769436 | O | -0.172088 | 4.175392  | 5.995079  | C | -0.759887 | 6.050060  | -2.568358 |
| O | 3.046447  | 6.556544  | -2.660527 | O | 1.716599  | 5.864424  | 4.665700  | O | -1.655581 | 6.055406  | -3.678923 |
| O | 1.124305  | 5.089492  | -1.392685 | O | 1.543346  | 4.809071  | 2.156854  | C | 0.432937  | 5.144393  | -2.844303 |
| H | 3.583775  | 3.395227  | 2.590098  | H | -3.117303 | 3.098272  | 2.068867  | O | 1.101121  | 5.690060  | -3.969576 |
| O | 1.792869  | 2.509851  | 2.322031  | O | -1.973257 | 2.349734  | 0.583863  | C | 1.319071  | 5.064716  | -1.604850 |
| H | 2.209279  | 4.498225  | 2.808290  | H | -2.586954 | 4.321450  | 0.896978  | O | 2.357696  | 4.112898  | -1.875128 |
| H | 5.925879  | 4.352077  | -1.635385 | H | -0.538172 | 3.318105  | 6.282425  | C | 0.502568  | 4.629045  | -0.383047 |
| H | 3.903929  | 6.486878  | -3.106153 | H | 1.693396  | 5.628733  | 5.605178  | O | -0.599400 | 5.553814  | -0.217567 |
| H | 0.897270  | 2.696049  | 1.963474  | H | -1.287377 | 2.641228  | -0.055886 | C | 1.312617  | 4.614565  | 0.924413  |
| O | -2.537843 | 4.800513  | -1.165628 | O | 3.089597  | 5.055723  | -1.174697 | O | 2.338149  | 5.592420  | 0.984265  |
| C | -1.180264 | 4.424675  | -0.836746 | C | 2.142493  | 4.528470  | -0.215320 | C | 3.674582  | 4.584026  | -1.966982 |
| C | -0.255219 | 5.398364  | -1.582859 | C | 2.367657  | 5.293222  | 1.098166  | C | 4.352420  | 3.976048  | -3.197002 |
| C | -0.499028 | 5.293818  | -3.090632 | C | 3.806204  | 5.087175  | 1.578915  | O | 3.613707  | 4.315424  | -4.365490 |
| C | -1.974067 | 5.510810  | -3.408496 | C | 4.797345  | 5.472057  | 0.487281  | C | 4.473508  | 2.463471  | -3.052677 |
| C | -2.857594 | 4.614085  | -2.531566 | C | 4.436761  | 4.788849  | -0.838485 | O | 5.182205  | 2.011468  | -4.188633 |
| H | -0.986164 | 3.409284  | -1.199737 | H | 2.352524  | 3.467442  | -0.042310 | C | 5.159202  | 2.089065  | -1.733908 |
| H | -0.462142 | 6.424884  | -1.249043 | H | 2.183743  | 6.364547  | 0.935124  | O | 5.001876  | 0.676354  | -1.573990 |
| H | -0.223782 | 4.273425  | -3.400379 | H | 3.929871  | 4.014473  | 1.795477  | C | 4.494181  | 2.823800  | -0.556261 |
| H | -2.223147 | 6.554416  | -3.165146 | H | 4.722886  | 6.557925  | 0.327342  | O | 4.432376  | 4.237821  | -0.816187 |
| H | -3.909663 | 4.903983  | -2.629682 | H | 5.034772  | 5.205975  | -1.656516 | C | 5.225923  | 2.668078  | 0.762901  |
| C | -1.063503 | 4.405079  | 0.698100  | C | 0.736834  | 4.625561  | -0.836877 | O | 4.357982  | 3.168738  | 1.782514  |
| O | 0.233754  | 6.259727  | -3.821604 | O | 4.109414  | 5.870660  | 2.718900  | C | 6.140661  | -0.140091 | -1.378369 |
| O | -2.264637 | 5.244259  | -4.776000 | O | 6.131282  | 5.118861  | 0.837534  | C | 6.197751  | -1.211869 | -2.472443 |
| O | -2.672285 | 3.280368  | -2.927047 | O | 4.671678  | 3.410271  | -0.707271 | O | 6.219172  | -0.594134 | -3.758166 |
| H | -0.282088 | 5.085989  | 1.040261  | H | 0.066225  | 5.194495  | -0.190600 | C | 5.023950  | -2.174899 | -2.355138 |
| O | -0.707960 | 3.119517  | 1.201755  | O | 0.129308  | 3.350929  | -1.008393 | O | 5.211539  | -3.156019 | -3.357432 |
| H | -2.022533 | 4.740876  | 1.112831  | H | 0.827297  | 5.156313  | -1.793861 | C | 4.975524  | -2.759088 | -0.947500 |
| H | 1.170521  | 6.195026  | -3.556918 | H | 3.425007  | 5.700168  | 3.392690  | O | 3.759980  | -3.505530 | -0.851443 |

|   |           |           |           |   |           |           |           |   |           |           |           |
|---|-----------|-----------|-----------|---|-----------|-----------|-----------|---|-----------|-----------|-----------|
| H | -1.576284 | 5.694520  | -5.287966 | H | 6.256322  | 5.422268  | 1.749155  | C | 4.993677  | -1.641447 | 0.109679  |
| H | -1.380485 | 2.460530  | 0.915703  | H | 0.658588  | 2.832742  | -1.652365 | O | 6.115219  | -0.757596 | -0.111916 |
| O | -4.962524 | 0.509442  | -2.140843 | O | 5.049270  | 1.063732  | -3.520955 | C | 5.093374  | -2.179657 | 1.527566  |
| C | -3.800782 | 1.341171  | -1.910496 | C | 4.294588  | 1.783782  | -2.517509 | O | 6.177343  | -3.099221 | 1.615631  |
| C | -3.810563 | 2.422692  | -3.001591 | C | 5.282311  | 2.707881  | -1.788092 | C | 3.801046  | -4.815276 | -0.320406 |
| C | -3.734632 | 1.761958  | -4.380670 | C | 6.399308  | 1.878293  | -1.150222 | C | 3.274059  | -5.797941 | -1.374073 |
| C | -4.846343 | 0.731815  | -4.546586 | C | 7.070606  | 0.992664  | -2.192629 | O | 4.024480  | -5.660525 | -2.579911 |
| C | -4.886056 | -0.224900 | -3.347338 | C | 6.024915  | 0.194005  | -2.981580 | C | 1.790002  | -5.571762 | -1.632195 |
| H | -2.894528 | 0.737971  | -2.031443 | H | 3.881203  | 1.072849  | -1.793498 | O | 1.380879  | -6.585915 | -2.533705 |
| H | -4.734371 | 3.012937  | -2.924814 | H | 5.716835  | 3.419438  | -2.504434 | C | 1.025723  | -5.603237 | -0.312063 |
| H | -2.767417 | 1.238711  | -4.440821 | H | 5.935185  | 1.229067  | -0.391234 | O | -0.342753 | -5.283012 | -0.605786 |
| H | -5.806209 | 1.269020  | -4.567887 | H | 7.592394  | 1.645341  | -2.908180 | C | 1.621535  | -4.598241 | 0.680748  |
| H | -5.792436 | -0.839904 | -3.379603 | H | 6.492357  | -0.294887 | -3.843611 | O | 3.025099  | -4.915154 | 0.853949  |
| C | -3.836062 | 1.823396  | -0.450837 | C | 3.114621  | 2.470031  | -3.230139 | C | 0.952558  | -4.626007 | 2.066204  |
| O | -3.868098 | 2.698434  | -5.434459 | O | 7.407100  | 2.689054  | -0.574142 | O | 0.427028  | -5.892041 | 2.435674  |
| O | -4.684555 | -0.032038 | -5.736523 | O | 7.990612  | 0.082730  | -1.599264 | H | -0.870257 | -7.201675 | -0.060269 |
| O | -3.737831 | -1.032683 | -3.385436 | O | 5.450287  | -0.759495 | -2.124880 | H | -2.988628 | -7.182357 | -1.264830 |
| H | -3.820048 | 2.913575  | -0.402639 | H | 3.113232  | 3.543622  | -3.034799 | H | -2.113390 | -6.608585 | -3.418953 |
| O | -2.687912 | 1.381651  | 0.277036  | O | 1.850014  | 1.992143  | -2.783182 | H | -2.322801 | -4.310969 | -2.024202 |
| H | -4.755564 | 1.469404  | 0.029299  | H | 3.238797  | 2.314075  | -4.309887 | H | -4.538219 | -4.582217 | -2.908479 |
| H | -3.211561 | 3.405992  | -5.294318 | H | 6.975191  | 3.332171  | 0.018643  | H | -4.581938 | -5.310783 | -0.247041 |
| H | -4.497915 | 0.607259  | -6.440178 | H | 8.519862  | 0.605187  | -0.978287 | H | -2.014742 | -3.816242 | 0.510265  |
| H | -2.732785 | 0.404148  | 0.368982  | H | 1.803655  | 1.020186  | -2.923731 | H | -3.962195 | -5.222475 | 2.361820  |
| O | -3.325551 | -4.188685 | -1.528461 | O | 3.604882  | -3.739764 | -3.245521 | H | -4.107262 | -3.490328 | 1.956669  |
| C | -3.239170 | -2.753272 | -1.689596 | C | 3.711809  | -2.369528 | -2.793716 | H | -2.684906 | -4.167083 | 3.875135  |
| C | -3.852521 | -2.416624 | -3.059212 | C | 5.209273  | -2.072677 | -2.626660 | H | -6.138112 | -3.885299 | -0.176142 |
| C | -3.089552 | -3.148779 | -4.165726 | C | 5.808409  | -3.027209 | -1.590060 | H | -7.272760 | -2.280753 | -1.610689 |
| C | -3.042593 | -4.645445 | -3.887222 | C | 5.523049  | -4.476708 | -1.968429 | H | -6.256006 | -2.894574 | -3.667715 |
| C | -2.548538 | -4.915738 | -2.459836 | C | 4.033754  | -4.678762 | -2.278295 | H | -4.515675 | -1.251397 | -2.393164 |
| H | -2.186657 | -2.448077 | -1.692920 | H | 3.228413  | -2.272239 | -1.815464 | H | -5.973262 | 0.286538  | -3.496335 |
| H | -4.908090 | -2.722975 | -3.075118 | H | 5.718999  | -2.209014 | -3.590738 | H | -6.713538 | 0.075829  | -0.738322 |
| H | -2.057636 | -2.764029 | -4.163729 | H | 5.317236  | -2.817629 | -0.626783 | H | -3.980287 | -1.016028 | 0.079193  |
| H | -4.067746 | -5.038048 | -3.959223 | H | 6.081140  | -4.701705 | -2.889469 | H | -4.198218 | 0.644103  | 1.635634  |
| H | -2.692856 | -5.971059 | -2.202782 | H | 3.869111  | -5.663937 | -2.728742 | H | -5.170370 | -0.616209 | 2.398138  |
| C | -3.915075 | -2.113327 | -0.464742 | C | 2.931627  | -1.485044 | -3.782505 | H | -6.000859 | 1.769260  | 1.225562  |
| O | -3.691451 | -2.973534 | -5.435544 | O | 7.213310  | -2.890250 | -1.481191 | H | -6.734353 | 2.093977  | -1.138982 |
| O | -2.192393 | -5.325844 | -4.803983 | O | 5.900964  | -5.377708 | -0.933600 | H | -6.003255 | 3.951009  | -2.541942 |
| O | -1.190543 | -4.569005 | -2.380260 | O | 3.307331  | -4.553399 | -1.083026 | H | -5.438147 | 2.652088  | -4.464945 |
| H | -4.649341 | -1.368197 | -0.773751 | H | 3.581234  | -0.732437 | -4.232981 | H | -3.335972 | 2.496919  | -2.756090 |
| O | -2.998609 | -1.425270 | 0.383654  | O | 1.882171  | -0.766731 | -3.141477 | H | -2.976646 | 4.679720  | -3.851967 |
| H | -4.438515 | -2.908746 | 0.082182  | H | 2.542252  | -2.130113 | -4.580660 | H | -3.986237 | 5.158082  | -1.420706 |
| H | -3.815324 | -2.017114 | -5.579797 | H | 7.414494  | -1.947638 | -1.330779 | H | -3.257567 | 2.481676  | -0.136389 |
| H | -2.427211 | -4.993393 | -5.683216 | H | 6.788774  | -5.107745 | -0.655193 | H | -2.474520 | 4.272946  | 1.200076  |
| H | -2.290249 | -2.043549 | 0.678447  | H | 1.246643  | -1.407720 | -2.751575 | H | -3.946221 | 3.626023  | 1.966548  |
| O | 1.118172  | -5.771911 | 0.223632  | O | -0.142961 | -5.736385 | -0.579904 | H | -3.850095 | 6.009263  | 1.741367  |
| C | 0.176859  | -4.832955 | -0.347245 | C | 0.854614  | -4.743476 | -0.915534 | H | -2.272627 | 6.318849  | -1.017594 |
| C | -0.302588 | -5.436641 | -1.676170 | C | 2.220145  | -5.445357 | -0.842942 | H | -0.387670 | 7.069047  | -2.389968 |
| C | 0.889529  | -5.650880 | -2.611882 | C | 2.445093  | -5.984242 | 0.572606  | H | -1.086955 | 6.152162  | -4.459507 |
| C | 1.961429  | -6.490305 | -1.926453 | C | 1.288906  | -6.881767 | 0.997972  | H | 0.059214  | 4.132646  | -3.063334 |
| C | 2.297742  | -5.919456 | -0.542819 | C | -0.057435 | -6.185210 | 0.758673  | H | 1.855526  | 5.112678  | -4.195588 |

|   |           |           |           |   |           |           |           |   |           |           |           |
|---|-----------|-----------|-----------|---|-----------|-----------|-----------|---|-----------|-----------|-----------|
| H | 0.687629  | -3.886321 | -0.554369 | H | 0.836687  | -3.942531 | -0.168212 | H | 1.756788  | 6.044776  | -1.388372 |
| H | -0.793101 | -6.400989 | -1.482301 | H | 2.245181  | -6.275499 | -1.562698 | H | 0.091182  | 3.625658  | -0.551805 |
| H | 1.315541  | -4.660505 | -2.876757 | H | 2.477962  | -5.118066 | 1.252025  | H | 1.722147  | 3.610730  | 1.072347  |
| H | 1.554209  | -7.500781 | -1.773568 | H | 1.307940  | -7.782565 | 0.366688  | H | 0.604187  | 4.803574  | 1.740051  |
| H | 2.926796  | -6.621728 | 0.015495  | H | -0.881663 | -6.895826 | 0.886319  | H | 3.173152  | 5.136015  | 0.795529  |
| C | -0.906239 | -4.553197 | 0.711210  | C | 0.460090  | -4.121399 | -2.266726 | H | 3.697644  | 5.676999  | -2.012548 |
| O | 0.524722  | -6.326835 | -3.801455 | O | 3.632098  | -6.749544 | 0.672922  | H | 5.364926  | 4.401088  | -3.258206 |
| O | 3.155514  | -6.555437 | -2.698574 | O | 1.379486  | -7.243312 | 2.371557  | H | 3.935766  | 3.724210  | -5.063213 |
| O | 2.958050  | -4.692424 | -0.714940 | O | -0.177289 | -5.119638 | 1.664891  | H | 3.457554  | 2.040157  | -3.022473 |
| H | -1.897572 | -4.805654 | 0.330484  | H | 1.278217  | -4.201345 | -2.984439 | H | 5.377989  | 1.058321  | -4.083190 |
| O | -0.965967 | -3.179702 | 1.075640  | O | 0.166705  | -2.731304 | -2.156711 | H | 6.224706  | 2.351720  | -1.795131 |
| H | -0.698367 | -5.187127 | 1.582944  | H | -0.400606 | -4.678130 | -2.658882 | H | 3.476961  | 2.430235  | -0.442246 |
| H | -0.234695 | -5.858530 | -4.195815 | H | 4.367774  | -6.210846 | 0.326917  | H | 6.160519  | 3.244574  | 0.719966  |
| H | 2.877053  | -6.753348 | -3.605152 | H | 2.296457  | -7.521689 | 2.514310  | H | 5.468968  | 1.610185  | 0.924357  |
| H | -0.113550 | -2.918727 | 1.489592  | H | -0.609232 | -2.607819 | -1.564820 | H | 4.873739  | 3.331306  | 2.581645  |
| O | 4.986006  | -3.009456 | 1.854730  | O | -3.344305 | -3.460256 | 2.551070  | H | 7.050796  | 0.469854  | -1.393833 |
| C | 3.763385  | -3.262766 | 1.122591  | C | -2.140491 | -3.631501 | 1.766683  | H | 7.126176  | -1.780890 | -2.323070 |
| C | 4.071171  | -4.389769 | 0.124476  | C | -1.434957 | -4.889818 | 2.298281  | H | 6.051938  | -1.311812 | -4.389419 |
| C | 5.191149  | -3.951402 | -0.822535 | C | -1.107658 | -4.714265 | 3.783293  | H | 4.091239  | -1.613754 | -2.523732 |
| C | 6.416004  | -3.506166 | -0.032341 | C | -2.359871 | -4.352699 | 4.572051  | H | 4.653038  | -3.931901 | -3.149879 |
| C | 6.024765  | -2.489486 | 1.048263  | C | -3.095308 | -3.177615 | 3.914488  | H | 5.840449  | -3.412812 | -0.793733 |
| H | 3.482731  | -2.364533 | 0.561965  | H | -1.479575 | -2.771095 | 1.920307  | H | 4.060701  | -1.069154 | 0.035056  |
| H | 4.385061  | -5.288283 | 0.674156  | H | -2.090132 | -5.762421 | 2.166397  | H | 4.139971  | -2.666987 | 1.764038  |
| H | 4.818131  | -3.089529 | -1.397759 | H | -0.394089 | -3.879439 | 3.865943  | H | 5.233063  | -1.329151 | 2.211676  |
| H | 6.828143  | -4.387697 | 0.480817  | H | -3.038576 | -5.218189 | 4.549042  | H | 6.064659  | -3.610012 | 2.426413  |
| H | 6.866441  | -2.312404 | 1.727199  | H | -4.081328 | -3.042700 | 4.372905  | H | 4.822455  | -5.070248 | -0.021905 |
| C | 2.646842  | -3.534138 | 2.147848  | C | -2.553302 | -3.647982 | 0.283995  | H | 3.402037  | -6.813926 | -0.973944 |
| O | 5.604411  | -4.994558 | -1.686480 | O | -0.574201 | -5.893730 | 4.356930  | H | 3.526767  | -6.159527 | -3.246724 |
| O | 7.404443  | -2.923144 | -0.874690 | O | -2.053097 | -4.006237 | 5.918078  | H | 1.661151  | -4.573713 | -2.078902 |
| H | 2.188883  | -4.509292 | 1.972733  | H | -2.164525 | -4.536270 | -0.216423 | H | 0.421097  | -6.498877 | -2.690446 |
| O | 1.591726  | -2.583114 | 2.064105  | O | -2.040455 | -2.536153 | -0.444511 | H | 1.086920  | -6.600998 | 0.134722  |
| H | 3.099786  | -3.539855 | 3.147861  | H | -3.649778 | -3.677764 | 0.240184  | H | 1.543749  | -3.582159 | 0.274052  |
| H | 4.813191  | -5.346677 | -2.135310 | H | 0.171070  | -6.189125 | 3.801479  | H | 0.172632  | -3.859561 | 2.098549  |
| H | 7.493581  | -3.519751 | -1.632873 | H | -1.449218 | -4.692326 | 6.239527  | H | 1.720410  | -4.345186 | 2.796512  |
| H | 1.941054  | -1.696539 | 2.302362  | H | -2.364149 | -1.700741 | -0.038764 | H | -0.525609 | -5.858161 | 2.253113  |
| C | -3.979999 | -3.853432 | 5.700884  | C | -6.822098 | 3.024992  | -7.059828 | C | -3.732150 | 1.741467  | 4.883445  |
| C | -4.093232 | -3.722697 | 4.318173  | C | -7.352456 | 1.740173  | -7.160547 | C | -3.019914 | 2.912912  | 5.137628  |
| C | -4.102810 | -2.451306 | 3.748016  | C | -7.160615 | 0.837466  | -6.116915 | C | -1.626387 | 2.885297  | 5.120306  |
| C | -4.010738 | -1.292165 | 4.531338  | C | -6.451784 | 1.185985  | -4.958338 | C | -0.913334 | 1.707182  | 4.855496  |
| C | -3.858053 | -1.426939 | 5.925270  | C | -5.898194 | 2.477550  | -4.868568 | C | -1.634242 | 0.529787  | 4.576160  |
| C | -3.848619 | -2.709680 | 6.486420  | C | -6.094350 | 3.376125  | -5.924546 | C | -3.033595 | 0.568553  | 4.600348  |
| C | -3.574775 | -0.220154 | 6.802259  | C | -5.006120 | 2.866295  | -3.704523 | C | -0.925360 | -0.736950 | 4.133605  |
| C | -2.317339 | 0.466257  | 6.321645  | C | -3.817369 | 1.937161  | -3.635913 | C | -0.131964 | -0.455296 | 2.879622  |
| C | -1.110479 | 0.401073  | 7.016470  | C | -2.526720 | 2.346010  | -3.967803 | C | -0.934064 | -0.934064 | 1.627446  |
| C | 0.040514  | 1.018151  | 6.519507  | C | -1.449092 | 1.458962  | -3.904410 | C | 0.231249  | -0.647200 | 0.482585  |
| C | -0.017102 | 1.703773  | 5.307918  | C | -1.673089 | 0.141492  | -3.509238 | C | 1.377747  | 0.138205  | 0.595097  |
| C | -1.217724 | 1.776477  | 4.597871  | C | -2.960201 | -0.285820 | -3.175379 | C | 1.770871  | 0.639259  | 1.839763  |
| C | -2.373539 | 1.157757  | 5.092891  | C | -4.043261 | 0.602286  | -3.237747 | C | 1.019880  | 0.352182  | 2.989720  |
| C | -4.173221 | 0.032710  | 3.788515  | C | -6.424997 | 0.138950  | -3.846569 | C | 0.605946  | 1.797830  | 4.984843  |
| N | -3.639714 | 1.244857  | 4.449290  | N | -5.359719 | 0.249471  | -2.828292 | N | 1.410381  | 0.767387  | 4.291363  |

|           |                |           |          |           |                |           |           |           |                |           |           |
|-----------|----------------|-----------|----------|-----------|----------------|-----------|-----------|-----------|----------------|-----------|-----------|
| C         | -5.676655      | 0.259239  | 3.516711 | C         | -7.787754      | 0.160348  | -3.118661 | C         | 0.978399       | 1.770423  | 6.483451  |
| C         | -3.851440      | 2.423680  | 3.607456 | C         | -5.456866      | -0.843590 | -1.860588 | C         | 2.839808       | 1.008978  | 4.488510  |
| C         | -5.342442      | 2.628104  | 3.358251 | C         | -6.809930      | -0.807671 | -1.157733 | C         | 3.180904       | 0.981407  | 5.975077  |
| N         | -5.910843      | 1.451859  | 2.704795 | N         | -7.888932      | -0.910012 | -2.133357 | N         | 2.405824       | 1.991128  | 6.685009  |
| C         | -7.325442      | 1.626280  | 2.407911 | C         | -9.198970      | -0.944290 | -1.503210 | C         | 2.750934       | 2.057829  | 8.097131  |
| H         | -3.970691      | -4.836075 | 6.163931 | H         | -6.958519      | 3.743005  | -7.863395 | H         | -4.818070      | 1.740647  | 4.886275  |
| H         | -4.164862      | -4.602129 | 3.684720 | H         | -7.905871      | 1.438440  | -8.044981 | H         | -3.542371      | 3.841305  | 5.349180  |
| H         | -4.163175      | -2.344746 | 2.668178 | H         | -7.571067      | -0.166544 | -6.198711 | H         | -1.072774      | 3.800308  | 5.318884  |
| H         | -3.723063      | -2.807672 | 7.561947 | H         | -5.656123      | 4.368458  | -5.852553 | H         | -3.583257      | -0.342860 | 4.381362  |
| H         | -3.462891      | -0.539699 | 7.842648 | H         | -4.674310      | 3.901765  | -3.825213 | H         | -1.651573      | -1.533013 | 3.947833  |
| H         | -4.408149      | 0.491154  | 6.753147 | H         | -5.563157      | 2.797587  | -2.761883 | H         | -0.236739      | -1.079465 | 4.915687  |
| H         | -1.073990      | -0.134468 | 7.962227 | H         | -2.361219      | 3.379081  | -4.264136 | H         | -1.404011      | -1.559170 | 1.558483  |
| H         | 0.972453       | 0.958354  | 7.074141 | H         | -0.444628      | 1.797805  | -4.137257 | H         | -0.077664      | -1.034847 | -0.483553 |
| H         | 0.870920       | 2.165636  | 4.887119 | H         | -0.850237      | -0.564948 | -3.468443 | H         | 1.969111       | 0.370800  | -0.286421 |
| H         | -1.241176      | 2.304907  | 3.650526 | H         | -3.108669      | -1.309941 | -2.851017 | H         | 2.651258       | 1.269477  | 1.910582  |
| H         | -3.687328      | -0.084304 | 2.804860 | H         | -6.345923      | -0.849344 | -4.336368 | H         | 0.904447       | 2.791578  | 4.604162  |
| H         | -6.201484      | 0.315096  | 4.490794 | H         | -7.920753      | 1.162291  | -2.663785 | H         | 0.639336       | 0.804568  | 6.908009  |
| H         | -6.071641      | -0.608911 | 2.979816 | H         | -8.584239      | 0.028406  | -3.858071 | H         | 0.427868       | 2.565067  | 6.996758  |
| H         | -3.338986      | 2.336289  | 2.636157 | H         | -5.339504      | -1.832060 | -2.340546 | H         | 3.158817       | 1.977198  | 4.065573  |
| H         | -3.448158      | 3.294946  | 4.131415 | H         | -4.659897      | -0.722686 | -1.122884 | H         | 3.394125       | 0.219151  | 3.973443  |
| H         | -5.486938      | 3.497652  | 2.705730 | H         | -6.880502      | -1.654383 | -0.464081 | H         | 4.248056       | 1.197679  | 6.106468  |
| H         | -5.845634      | 2.843106  | 4.321469 | H         | -6.881976      | 0.122926  | -0.559767 | H         | 2.994883       | -0.037181 | 6.369768  |
| H         | -7.946110      | 1.772168  | 3.312779 | H         | -9.435601      | -0.025818 | -0.931565 | H         | 2.541179       | 1.118964  | 8.644532  |
| H         | -7.704132      | 0.746827  | 1.877245 | H         | -9.974075      | -1.075190 | -2.265455 | H         | 2.186124       | 2.862625  | 8.578360  |
| H         | -7.462121      | 2.499047  | 1.760876 | H         | -9.254369      | -1.793595 | -0.814039 | H         | 3.817446       | 2.280695  | 8.205533  |
| <b>M2</b> |                |           |          | <b>M2</b> |                |           |           | <b>M2</b> |                |           |           |
| E         | -5082.90439992 |           |          | E         | -5082.90268715 |           |           | E         | -5082.86646526 |           |           |
| O         | 4.519641       | 2.396064  | 3.454072 | O         | -5.203568      | 1.938454  | 3.425943  | C         | 1.915268       | 5.948207  | -0.573339 |
| C         | 4.343309       | 1.125891  | 2.784253 | C         | -4.283142      | 2.492362  | 2.456515  | C         | 2.832503       | 5.904858  | -1.796366 |
| C         | 5.745595       | 0.620649  | 2.412071 | C         | -5.046387      | 3.583051  | 1.690232  | O         | 2.089630       | 6.255019  | -2.958931 |
| C         | 6.431989       | 1.628683  | 1.486327 | C         | -6.264072      | 2.972038  | 0.991531  | C         | 3.460975       | 4.524979  | -1.950934 |
| C         | 6.461613       | 3.004452  | 2.139879 | C         | -7.139944      | 2.244268  | 2.003716  | O         | 4.352125       | 4.617142  | -3.043534 |
| C         | 5.057766       | 3.400844  | 2.615015 | C         | -6.299309      | 1.266440  | 2.834734  | C         | 4.149011       | 4.079111  | -0.655477 |
| H         | 3.765982       | 1.277465  | 1.865412 | H         | -3.983633      | 1.708436  | 1.752293  | O         | 4.472057       | 2.694336  | -0.820668 |
| H         | 6.338595       | 0.500207  | 3.329391 | H         | -5.377939      | 4.355570  | 2.398123  | C         | 3.204331       | 4.257337  | 0.548144  |
| H         | 5.833975       | 1.694090  | 0.564401 | H         | -5.893215      | 2.236907  | 0.260717  | O         | 2.678018       | 5.597609  | 0.574369  |
| H         | 7.106891       | 2.947375  | 3.029095 | H         | -7.555877      | 2.991527  | 2.695780  | C         | 3.875109       | 4.040016  | 1.891751  |
| H         | 5.104096       | 4.305677  | 3.230947 | H         | -6.888232      | 0.870806  | 3.669625  | O         | 2.844822       | 3.999422  | 2.882356  |
| C         | 3.514453       | 0.218501  | 3.711951 | C         | -3.020620      | 2.945333  | 3.212714  | C         | 5.799462       | 2.245798  | -0.619387 |
| O         | 5.691284       | -0.608562 | 1.695392 | O         | -4.249523      | 4.165212  | 0.663506  | C         | 6.320779       | 1.591165  | -1.905632 |
| O         | 7.770812       | 1.270637  | 1.195222 | O         | -7.071535      | 3.948959  | 0.360017  | O         | 6.241801       | 2.511395  | -2.991920 |
| O         | 6.945487       | 4.003393  | 1.248781 | O         | -8.192936      | 1.524225  | 1.371937  | C         | 5.544468       | 0.319084  | -2.216986 |
| O         | 4.252107       | 3.609936  | 1.484372 | O         | -5.870951      | 0.227093  | 1.993059  | O         | 6.151112       | -0.251094 | -3.361848 |
| H         | 4.093112       | -0.656954 | 4.015377 | H         | -2.882074      | 4.025315  | 3.124953  | C         | 5.572194       | -0.604243 | -1.003896 |
| O         | 2.341331       | -0.285216 | 3.076303 | O         | -1.834175      | 2.351977  | 2.693036  | O         | 4.721082       | -1.718029 | -1.294470 |
| H         | 3.264695       | 0.794829  | 4.612376 | H         | -3.157953      | 2.701229  | 4.274437  | C         | 5.074108       | 0.124678  | 0.248793  |
| H         | 7.766959       | 0.386618  | 0.781759 | H         | -6.515218      | 4.440689  | -0.273417 | O         | 5.867315       | 1.321207  | 0.443370  |
| H         | 7.729225       | 3.622781  | 0.824495 | H         | -8.568829      | 2.127615  | 0.713411  | C         | 5.161253       | -0.731907 | 1.525519  |
| H         | 1.768221       | 0.468828  | 2.828140 | H         | -1.895486      | 1.379573  | 2.798234  | O         | 6.219967       | -1.674616 | 1.530548  |
| O         | 1.081216       | 5.465696  | 1.430237 | O         | -4.631812      | -3.046206 | 3.114295  | C         | 5.284479       | -3.005568 | -1.311753 |

|   |           |           |           |   |           |           |           |   |           |           |           |
|---|-----------|-----------|-----------|---|-----------|-----------|-----------|---|-----------|-----------|-----------|
| C | 1.880670  | 4.260848  | 1.485437  | C | -4.468621 | -1.685587 | 2.648793  | C | 4.840367  | -3.732048 | -2.581662 |
| C | 3.348806  | 4.712561  | 1.484418  | C | -5.883029 | -1.106283 | 2.496133  | O | 5.251657  | -2.977688 | -3.719252 |
| C | 3.645993  | 5.494690  | 0.202101  | C | -6.668829 | -1.930592 | 1.472590  | C | 3.332799  | -3.945702 | -2.581042 |
| C | 2.669850  | 6.654746  | 0.043815  | C | -6.672596 | -3.404219 | 1.862610  | O | 3.029862  | -4.683176 | -3.749365 |
| C | 1.221897  | 6.176173  | 0.213800  | C | -5.249272 | -3.892689 | 2.162650  | C | 2.908800  | -4.659799 | -1.300178 |
| H | 1.698230  | 3.659824  | 0.587662  | H | -3.983674 | -1.692443 | 1.666400  | O | 1.479462  | -4.636630 | -1.276169 |
| H | 3.532504  | 5.353074  | 2.358298  | H | -6.395194 | -1.139883 | 3.467902  | C | 3.460093  | -3.945411 | -0.051623 |
| H | 3.504121  | 4.804612  | -0.644469 | H | -6.154868 | -1.829515 | 0.503741  | O | 4.889485  | -3.751963 | -0.169156 |
| H | 2.871716  | 7.378819  | 0.847266  | H | -7.255832 | -3.507003 | 2.789891  | C | 3.195351  | -4.714440 | 1.232227  |
| H | 0.543737  | 7.033262  | 0.292156  | H | -5.276861 | -4.885926 | 2.624640  | O | 3.642021  | -6.056238 | 1.074676  |
| C | 1.414118  | 3.431985  | 2.696266  | C | -3.523626 | -0.957702 | 3.622990  | C | 0.778345  | -5.827606 | -0.969956 |
| O | 4.951485  | 6.041945  | 0.194862  | O | -8.019945 | -1.519857 | 1.373081  | C | -0.102076 | -6.215811 | -2.165245 |
| O | 2.798135  | 7.282130  | -1.226783 | O | -7.230340 | -4.220170 | 0.838893  | O | 0.701564  | -6.323735 | -3.339539 |
| O | 0.884465  | 5.377286  | -0.889843 | O | -4.527125 | -3.926857 | 0.959273  | C | -1.223690 | -5.205129 | -2.369343 |
| H | 2.252867  | 3.222665  | 3.362784  | H | -4.009444 | -0.074887 | 4.042866  | O | -2.033136 | -5.710369 | -3.416563 |
| O | 0.886024  | 2.161739  | 2.318719  | O | -2.338391 | -0.489503 | 2.984288  | C | -1.989359 | -5.010847 | -1.064077 |
| H | 0.673320  | 4.023834  | 3.249287  | H | -3.288478 | -1.646048 | 4.445269  | O | -2.959580 | -3.979483 | -1.293030 |
| H | 5.585758  | 5.318832  | 0.359130  | H | -8.033640 | -0.561471 | 1.190285  | C | -1.029629 | -4.623020 | 0.066940  |
| H | 3.748131  | 7.418648  | -1.359975 | H | -8.049817 | -3.780684 | 0.566618  | O | -0.022947 | -5.658786 | 0.178425  |
| H | 0.058300  | 2.301673  | 1.813738  | H | -1.817481 | -1.264030 | 2.683390  | C | -1.712208 | -4.471919 | 1.437117  |
| O | -2.583821 | 4.615698  | -1.856899 | O | -1.414463 | -5.837056 | 0.502034  | O | -2.842807 | -5.309897 | 1.614204  |
| C | -1.355142 | 4.365623  | -1.133944 | C | -2.169555 | -4.651661 | 0.848364  | C | -4.315797 | -4.293032 | -1.120038 |
| C | -0.406747 | 5.523396  | -1.479432 | C | -3.652928 | -5.026767 | 0.711399  | C | -5.119263 | -3.770971 | -2.314090 |
| C | -0.150522 | 5.534785  | -2.989315 | C | -3.940746 | -5.445183 | -0.733280 | O | -4.597767 | -4.325775 | -3.516688 |
| C | -1.460233 | 5.574122  | -3.770603 | C | -2.996461 | -6.556822 | -1.179206 | C | -5.091486 | -2.247620 | -2.364678 |
| C | -2.441607 | 4.509287  | -3.260919 | C | -1.537437 | -6.202784 | -0.859348 | O | -5.926390 | -1.870847 | -3.441227 |
| H | -0.903042 | 3.433819  | -1.491616 | H | -1.947461 | -3.854144 | 0.130717  | C | -5.527752 | -1.642058 | -1.025140 |
| H | -0.857458 | 6.477459  | -1.172072 | H | -3.888223 | -5.857577 | 1.391374  | O | -5.237454 | -0.241914 | -1.080924 |
| H | 0.370087  | 4.596154  | -3.237665 | H | -3.761249 | -4.564345 | -1.370016 | C | -4.724664 | -2.278084 | 0.121229  |
| H | -1.927159 | 6.554559  | -3.592764 | H | -3.244640 | -7.460270 | -0.602208 | O | -4.837750 | -3.713646 | 0.067624  |
| H | -3.441184 | 4.684899  | -3.674883 | H | -0.895743 | -7.081670 | -0.989618 | C | -5.161103 | -1.859063 | 1.512869  |
| C | -1.707241 | 4.157670  | 0.349126  | C | -1.690592 | -4.167856 | -2.228549 | O | -4.120545 | -2.256649 | 2.399104  |
| O | 0.613173  | 6.656846  | -3.392881 | O | -5.262679 | -5.925376 | -0.897622 | C | -6.285158 | 0.699983  | -0.985081 |
| O | -1.249285 | 5.371692  | -5.162264 | O | -3.108103 | -6.815656 | -2.573482 | C | -6.217133 | 1.658239  | -2.179064 |
| O | -1.968634 | 3.242035  | -3.635950 | O | -1.129657 | -5.163696 | -1.710463 | O | -6.328464 | 0.927725  | -3.398795 |
| H | -1.062253 | 4.764729  | 0.985173  | H | -2.538326 | -4.012986 | 2.897024  | C | -4.924303 | 2.463884  | -2.147758 |
| O | -1.514361 | 2.806601  | 0.764254  | O | -1.009253 | -2.918135 | 2.157926  | O | -4.977629 | 3.355681  | -3.245310 |
| H | -2.746246 | 4.475808  | 0.504292  | H | -1.047985 | -4.947345 | 2.658546  | C | -4.793340 | 3.178112  | -0.806952 |
| H | 1.397903  | 6.707407  | -2.816583 | H | -5.870448 | -5.267469 | -0.512317 | O | -3.477667 | 3.738335  | -0.763451 |
| H | -0.530454 | 5.971044  | -5.412272 | H | -4.056679 | -6.891381 | -2.755080 | C | -4.983726 | 2.199198  | 0.365826  |
| H | -2.177138 | 2.248125  | 0.299052  | H | -0.173793 | -3.048588 | 1.655282  | O | -6.200577 | 1.442029  | 0.213335  |
| O | -4.077431 | 0.204847  | -3.574145 | O | 2.406390  | -4.265427 | -2.280966 | C | -5.038016 | 2.904436  | 1.712180  |
| C | -3.270720 | 1.245165  | -2.976502 | C | 1.160674  | -4.250613 | -1.546474 | O | -5.993810 | 3.957569  | 1.655417  |
| C | -2.897579 | 2.250624  | -4.078858 | C | 0.184730  | -5.194066 | -2.268600 | C | -3.326160 | 5.077016  | -0.326530 |
| C | -2.162906 | 1.528692  | -5.208956 | C | -0.005258 | -4.730475 | -3.714275 | C | -2.730654 | 5.916247  | -1.465089 |
| C | -2.974571 | 0.344186  | -5.713351 | C | 1.336334  | -4.590117 | -4.421059 | O | -3.536504 | 5.779381  | -2.634867 |
| C | -3.399292 | -0.560302 | -4.546863 | C | 2.305808  | -3.739239 | -3.587991 | C | -1.289757 | 5.512500  | -1.750028 |
| H | -2.344546 | 0.808605  | -2.585480 | H | 0.736222  | -3.240325 | -1.568321 | O | -0.807350 | 6.415772  | -2.729297 |
| H | -3.803208 | 2.731963  | -4.474985 | H | 0.576489  | -6.221159 | -2.257943 | C | -0.481323 | 5.543799  | -0.456426 |
| H | -1.217005 | 1.146953  | -4.794123 | H | -0.482066 | -3.738363 | -3.679672 | O | 0.838109  | 5.072836  | -0.765121 |

|   |           |           |           |   |           |           |           |   |           |           |           |
|---|-----------|-----------|-----------|---|-----------|-----------|-----------|---|-----------|-----------|-----------|
| H | -3.894800 | 0.729746  | -6.176216 | H | 1.780173  | -5.592259 | -4.514395 | C | -1.143973 | 4.662145  | 0.607302  |
| H | -4.123723 | -1.304663 | -4.894954 | H | 3.315619  | -3.799523 | -4.008755 | O | -2.494570 | 5.147608  | 0.809698  |
| C | -4.075223 | 1.797444  | -1.791989 | C | 1.495314  | -4.589227 | -0.084942 | C | -0.419634 | 4.676776  | 1.962014  |
| O | -1.920148 | 2.381319  | -6.314648 | O | -0.788927 | -5.640285 | -4.466192 | O | 0.219443  | 5.905668  | 2.268959  |
| O | -2.240647 | -0.424628 | -6.661102 | O | 1.191037  | -3.999796 | -5.708733 | H | 1.563878  | 6.967489  | -0.386898 |
| O | -2.266038 | -1.190465 | -4.004130 | O | 1.855982  | -2.408501 | -3.573408 | H | 3.637014  | 6.636267  | -1.631467 |
| H | -4.050326 | 2.886501  | -1.771371 | H | 0.812889  | -5.342495 | 0.308952  | H | 2.643122  | 5.999225  | -3.712807 |
| O | -3.548706 | 1.368505  | -0.537736 | O | 1.373265  | -3.457248 | 0.772188  | H | 2.653871  | 3.804298  | -2.154460 |
| H | -5.116724 | 1.471422  | -1.911826 | H | 2.515766  | -4.994605 | -0.060162 | H | 4.875947  | 3.792374  | -3.098971 |
| H | -1.517271 | 3.198723  | -5.971087 | H | -1.597046 | -5.826534 | -3.954715 | H | 5.064198  | 4.670782  | -0.512742 |
| H | -1.833957 | 0.210502  | -7.269256 | H | 0.449208  | -4.456624 | -6.132563 | H | 2.377362  | 3.544285  | 0.447198  |
| H | -3.394313 | 0.390577  | -0.579215 | H | 1.894354  | -2.713939 | 0.377133  | H | 4.570382  | 4.869943  | 2.077517  |
| O | -2.147032 | -4.325955 | -2.064433 | O | 3.901565  | 0.577937  | -2.861298 | H | 4.442645  | 3.101060  | 1.869826  |
| C | -2.154637 | -2.885489 | -2.220172 | C | 3.011560  | -0.510637 | -2.514267 | H | 3.220441  | 4.251468  | 3.734446  |
| C | -2.338995 | -2.588371 | -3.719760 | C | 2.805867  | -1.361518 | -3.779185 | H | 6.442682  | 3.084052  | -0.329357 |
| C | -1.238675 | -3.258816 | -4.542024 | C | 2.252256  | -0.505329 | -4.916801 | H | 7.371571  | 1.319987  | -1.730281 |
| C | -1.199263 | -4.749806 | -4.240272 | C | 3.157496  | 0.695563  | -5.153188 | H | 6.385752  | 1.975860  | -3.788553 |
| C | -1.088971 | -4.989553 | -2.729546 | C | 3.392209  | 1.460482  | -3.843236 | H | 4.496190  | 0.587868  | -2.419713 |
| H | -1.201644 | -2.471944 | -1.872954 | H | 2.048796  | -0.106729 | -2.183717 | H | 5.713666  | -1.102802 | -3.559471 |
| H | -3.314208 | -2.983972 | -4.037242 | H | 3.771754  | -1.787186 | -4.086362 | H | 6.595944  | -0.947750 | -0.820177 |
| H | -0.276349 | -2.814660 | -4.244491 | H | 1.259607  | -0.140285 | -4.610958 | H | 4.029645  | 0.424176  | 0.099840  |
| H | -2.146717 | -5.194273 | -4.578217 | H | 4.134235  | 0.326888  | -5.499022 | H | 4.193452  | -1.225896 | 1.674901  |
| H | -1.218787 | -6.052831 | -2.499567 | H | 4.165660  | 2.224110  | -3.980973 | H | 5.308784  | -0.051883 | 2.370385  |
| C | -3.271116 | -2.339348 | -1.304986 | C | 3.639609  | -1.258212 | -1.322089 | H | 5.864748  | -2.505285 | 1.174002  |
| O | -1.446854 | -3.135130 | -5.937004 | O | 2.177967  | -1.212539 | -6.141570 | H | 6.376571  | -2.952393 | -1.261371 |
| O | -0.108999 | -5.379581 | -4.907627 | O | 2.603626  | 1.575666  | -6.127077 | H | 5.330266  | -4.715947 | -2.589728 |
| O | 0.164304  | -4.534810 | -2.282592 | O | 2.183431  | 2.047912  | -3.352197 | H | 4.767452  | -3.352118 | -4.471200 |
| H | -4.139385 | -2.039319 | -1.902365 | H | 3.934948  | -2.270017 | -1.620079 | H | 2.841119  | -2.960388 | -2.598178 |
| O | -2.836888 | -1.215518 | -0.549444 | O | 2.730818  | -1.353870 | -0.233038 | H | 2.143618  | -5.084957 | -3.649479 |
| H | -3.580386 | -3.158289 | -0.645658 | H | 4.544208  | -0.712565 | -1.030037 | H | 3.277938  | -5.690427 | -1.318568 |
| H | -1.526871 | -2.187795 | -6.160373 | H | 1.679689  | -2.038365 | -5.991801 | H | 2.971844  | -2.965619 | 0.029985  |
| H | -0.122020 | -5.026435 | -5.810994 | H | 2.289707  | 1.005928  | -6.846103 | H | 2.115792  | -4.674831 | 1.427444  |
| H | -2.761451 | -1.419655 | 0.431035  | H | 3.056022  | -0.867266 | 0.581979  | H | 3.719137  | -4.207949 | 2.056681  |
| O | 2.164722  | -5.750788 | 0.568194  | O | 1.670249  | 5.050177  | -1.349954 | H | 3.358625  | -6.556380 | 1.849787  |
| C | 1.127214  | -4.986365 | -0.087094 | C | 1.875966  | 3.640952  | -1.601895 | H | 1.483356  | -6.627566 | -0.724411 |
| C | 1.025880  | -5.419952 | -1.559199 | C | 2.151669  | 3.439975  | -3.101841 | H | -0.556746 | -7.190777 | -1.938619 |
| C | 2.388593  | -5.333081 | -2.248499 | C | 1.024905  | 4.046207  | -3.940565 | H | 0.070636  | -6.393436 | -4.073345 |
| C | 3.450500  | -6.070154 | -1.443686 | C | 0.778462  | 5.495701  | -3.544981 | H | -0.776453 | -4.238644 | -2.649985 |
| C | 3.452268  | -5.597097 | 0.013181  | C | 0.574371  | 5.619342  | -2.031301 | H | -2.800295 | -5.117687 | -3.534919 |
| H | 1.379905  | -3.920123 | -0.054261 | H | 0.973060  | 3.081436  | -1.330298 | H | -2.492378 | -5.940833 | -0.779706 |
| H | 0.651868  | -6.451569 | -1.624387 | H | 3.104690  | 3.915427  | -3.374070 | H | -0.527077 | -3.679335 | -0.183349 |
| H | 2.665578  | -4.268122 | -2.289865 | H | 0.111567  | 3.469472  | -3.726469 | H | -1.984083 | -3.422921 | 1.588319  |
| H | 3.202128  | -7.141492 | -1.443489 | H | 1.672615  | 6.080251  | -3.806800 | H | -0.963672 | -4.733545 | 2.195115  |
| H | 4.112294  | -6.229791 | 0.617357  | H | 0.558543  | 6.674644  | -1.736151 | H | -3.623440 | -4.747265 | 1.489227  |
| C | -0.154884 | -5.218754 | 0.708319  | C | 3.019861  | 3.197064  | -0.693143 | H | -4.454397 | -5.371749 | -1.001776 |
| O | 2.387993  | -5.909454 | -3.540875 | O | 1.312024  | 4.048437  | -5.326325 | H | -6.161430 | -4.093818 | -2.174299 |
| O | 4.746506  | -5.872569 | -2.002636 | O | -0.361096 | 6.025024  | -4.217106 | H | -4.979509 | -3.796370 | -4.234129 |
| O | 3.882089  | -4.258915 | 0.051637  | O | -0.636004 | 4.993707  | -1.686230 | H | -4.051693 | -1.930112 | -2.538328 |
| H | -1.017407 | -5.055015 | 0.055841  | H | 3.504423  | 2.319989  | -1.131719 | H | -5.935462 | -0.894464 | -3.506897 |
| O | -0.315578 | -4.343959 | 1.806983  | O | 2.604656  | 2.819808  | 0.604118  | H | -6.604494 | -1.806242 | -0.879743 |

|   |           |           |           |   |           |           |           |   |           |           |           |
|---|-----------|-----------|-----------|---|-----------|-----------|-----------|---|-----------|-----------|-----------|
| H | -0.161000 | -6.274650 | 1.024490  | H | 3.757210  | 4.016342  | -0.665788 | H | -3.673363 | -1.993645 | -0.005779 |
| H | 1.619883  | -5.564534 | -4.037163 | H | 1.578240  | 3.146598  | -5.592057 | H | -6.112470 | -2.354535 | 1.757917  |
| H | 4.639755  | -5.995829 | -2.958345 | H | -0.270083 | 5.746273  | -5.141275 | H | -5.321815 | -0.773584 | 1.524050  |
| H | 0.544488  | -4.138704 | 2.223947  | H | 1.905945  | 3.418328  | 0.936730  | H | -4.278281 | -1.900087 | 3.284011  |
| O | 5.401985  | -2.556701 | 2.939049  | O | -2.662460 | 5.751163  | 1.292886  | H | -7.255384 | 0.192504  | -0.951754 |
| C | 4.306720  | -2.998785 | 2.104583  | C | -1.610082 | 5.083220  | 0.558380  | H | -7.062770 | 2.354249  | -2.088389 |
| C | 4.887333  | -3.879391 | 0.989291  | C | -1.562189 | 5.687651  | -0.852247 | H | -6.055924 | 1.543726  | -4.096753 |
| C | 5.940307  | -3.108845 | 0.188034  | C | -2.921322 | 5.556547  | -1.544382 | H | -4.077292 | 1.767340  | -2.249220 |
| C | 6.991798  | -2.519321 | 1.120958  | C | -4.025919 | 6.128853  | -0.664122 | H | -4.339937 | 4.081563  | -3.093447 |
| C | 6.323411  | -1.733309 | 2.253008  | C | -3.947379 | 5.535264  | 0.745721  | H | -5.549545 | 3.967294  | -0.743755 |
| H | 3.826894  | -2.127121 | 1.646912  | H | -1.848491 | 4.017727  | 0.474038  | H | -4.130518 | 1.508416  | 0.380780  |
| H | 5.352262  | -4.772572 | 1.430537  | H | -1.292124 | 6.751434  | -0.788113 | H | -4.033902 | 3.292136  | 1.927886  |
| H | 5.425983  | -2.279146 | -0.321275 | H | -3.116077 | 4.482482  | -1.688474 | H | -5.303985 | 2.162371  | 2.479934  |
| H | 7.547627  | -3.350090 | 1.579938  | H | -3.866964 | 7.213520  | -0.575015 | H | -5.907503 | 4.480221  | 2.462076  |
| H | 7.065733  | -1.430753 | 2.999736  | H | -4.646254 | 6.046878  | 1.416753  | H | -4.293078 | 5.479123  | -0.009417 |
| C | 3.276798  | -3.673491 | 3.027325  | C | -0.321591 | 5.215273  | 1.391249  | H | -2.731787 | 6.965858  | -1.137649 |
| O | 6.621747  | -3.931050 | -0.740817 | O | -2.968301 | 6.251084  | -2.776985 | H | -3.019056 | 6.185295  | -3.348181 |
| O | 7.887817  | -1.655356 | 0.428801  | O | -5.318623 | 5.867077  | -1.202010 | H | -1.284374 | 4.479376  | -2.131723 |
| H | 3.200475  | -4.744421 | 2.824207  | H | 0.428421  | 5.815579  | 0.870701  | H | 0.131447  | 6.215144  | -2.907821 |
| O | 1.967515  | -3.153594 | 2.852449  | O | 0.295559  | 3.963660  | 1.646531  | H | -0.430526 | 6.566077  | -0.067081 |
| H | 3.624239  | -3.547095 | 4.061845  | H | -0.582664 | 5.732706  | 2.324735  | H | -1.191378 | 3.623862  | 0.256260  |
| H | 5.957964  | -4.421211 | -1.263490 | H | -2.181333 | 6.003268  | -3.299578 | H | 0.296043  | 3.849213  | 1.979012  |
| H | 8.132012  | -2.119313 | -0.385887 | H | -5.262131 | 6.073508  | -2.146901 | H | -1.175566 | 4.477338  | 2.731522  |
| H | 1.983512  | -2.184891 | 2.988679  | H | -0.352044 | 3.366704  | 2.074680  | H | 1.162565  | 5.781692  | 2.076887  |
| C | -6.626940 | 3.307877  | 3.875670  | C | 8.182319  | 3.651603  | 2.812040  | C | 3.607202  | -0.885919 | 5.718601  |
| C | -6.069859 | 3.136240  | 2.609881  | C | 7.407850  | 3.472598  | 1.667335  | C | 3.577927  | 0.396214  | 5.172281  |
| C | -5.533261 | 1.900429  | 2.254633  | C | 6.650014  | 2.312484  | 1.527795  | C | 2.524115  | 0.766441  | 4.338645  |
| C | -5.534509 | 0.816759  | 3.145799  | C | 6.638178  | 1.315450  | 2.513621  | C | 1.486955  | -0.126228 | 4.026834  |
| C | -6.111739 | 0.985874  | 4.418827  | C | 7.435521  | 1.489666  | 3.660421  | C | 1.507552  | -1.414277 | 4.594066  |
| C | -6.650147 | 2.232751  | 4.761101  | C | 8.196335  | 2.658357  | 3.788789  | C | 2.570707  | -1.771776 | 5.433325  |
| C | -6.256948 | -0.177723 | 5.381853  | C | 7.566378  | 0.391982  | 4.699770  | C | 0.356583  | -2.381587 | 4.391177  |
| C | -7.068808 | -1.278127 | 4.742995  | C | 8.099873  | -0.865375 | 4.056326  | C | -0.934493 | -1.778427 | 4.888604  |
| C | -8.370159 | -1.579756 | 5.141220  | C | 9.393369  | -1.332820 | 4.283120  | C | -1.585947 | -2.244336 | 6.029982  |
| C | -9.093746 | -2.604407 | 4.526048  | C | 9.858265  | -2.498065 | 3.668299  | C | -2.789631 | -1.680113 | 6.458563  |
| C | -8.506798 | -3.330720 | 3.492734  | C | 9.017099  | -3.199025 | 2.807636  | C | -3.341880 | -0.622473 | 5.737838  |
| C | -7.209208 | -3.031476 | 3.072134  | C | 7.723239  | -2.736586 | 2.558184  | C | -2.693282 | -0.132658 | 4.600342  |
| C | -6.479418 | -2.004440 | 3.686708  | C | 7.251892  | -1.568913 | 3.174367  | C | -1.487496 | -0.702826 | 4.161431  |
| C | -4.817460 | -0.445279 | 2.660117  | C | 5.673410  | 0.153360  | 2.278346  | C | 0.462082  | 0.374451  | 3.010179  |
| N | -5.125449 | -1.712554 | 3.359936  | N | 5.916998  | -1.099665 | 3.026700  | N | -0.846702 | -0.313487 | 2.955765  |
| C | -3.294424 | -0.197197 | 2.739570  | C | 4.242447  | 0.639683  | 2.589501  | C | 1.096581  | 0.310781  | 1.602806  |
| C | -4.352151 | -2.823282 | 2.805535  | C | 4.919508  | -2.111362 | 2.681004  | C | -1.710470 | 0.295911  | 1.944103  |
| C | -2.858698 | -2.550680 | 2.920493  | C | 3.513303  | -1.619684 | 3.004252  | C | -1.058785 | 0.225813  | 0.568148  |
| N | -2.520985 | -1.320515 | 2.185713  | N | 3.232861  | -0.381011 | 2.264826  | N | 0.235146  | 0.899445  | 0.582922  |
| C | -1.077722 | -1.045246 | 2.232648  | C | 1.877470  | 0.120587  | 2.535576  | C | 0.867118  | 0.882538  | -0.730753 |
| H | -7.051471 | 4.263943  | 4.168439  | H | 8.781141  | 4.548824  | 2.938711  | H | 4.420767  | -1.190247 | 6.370300  |
| H | -6.054695 | 3.956903  | 1.898341  | H | 7.393897  | 4.226820  | 0.886239  | H | 4.368052  | 1.106853  | 5.397437  |
| H | -5.087634 | 1.772627  | 1.271148  | H | 6.044630  | 2.176476  | 0.634980  | H | 2.504674  | 1.766432  | 3.910255  |
| H | -7.103169 | 2.353170  | 5.742026  | H | 8.816936  | 2.781994  | 4.672737  | H | 2.575188  | -2.764664 | 5.876049  |
| H | -6.738430 | 0.165121  | 6.302255  | H | 8.233776  | 0.722048  | 5.501030  | H | 0.564755  | -3.316859 | 4.918660  |
| H | -5.269831 | -0.576239 | 5.646661  | H | 6.588153  | 0.173226  | 5.145431  | H | 0.242691  | -2.615634 | 3.325212  |

|            |                |           |           |            |                |           |           |            |                |           |           |
|------------|----------------|-----------|-----------|------------|----------------|-----------|-----------|------------|----------------|-----------|-----------|
| H          | -8.816650      | -1.014601 | 5.955648  | H          | 10.040048      | -0.784540 | 4.963719  | H          | -1.154134      | -3.077087 | 6.579138  |
| H          | -10.102400     | -2.833851 | 4.856323  | H          | 10.864979      | -2.854092 | 3.865278  | H          | -3.288583      | -2.064256 | 7.342839  |
| H          | -9.056638      | -4.130414 | 3.004528  | H          | 9.364276       | -4.106124 | 2.321034  | H          | -4.269729      | -0.161792 | 6.066109  |
| H          | -6.768909      | -3.600282 | 2.260272  | H          | 7.083434       | -3.287954 | 1.877577  | H          | -3.122893      | 0.705462  | 4.062069  |
| H          | -5.063818      | -0.562329 | 1.588606  | H          | 5.710559       | -0.072895 | 1.195053  | H          | 0.288311       | 1.443140  | 3.229240  |
| H          | -3.021799      | -0.022895 | 3.794830  | H          | 4.194583       | 0.903891  | 3.660631  | H          | 1.333388       | -0.749799 | 1.380112  |
| H          | -3.048624      | 0.709317  | 2.180572  | H          | 4.015035       | 1.535892  | 2.008163  | H          | 2.039223       | 0.864830  | 1.622066  |
| H          | -4.598215      | -3.013637 | 1.743631  | H          | 4.954665       | -2.384523 | 1.610352  | H          | -1.931660      | 1.354285  | 2.173429  |
| H          | -4.598691      | -3.727927 | 3.367701  | H          | 5.127612       | -3.014450 | 3.260676  | H          | -2.647232      | -0.264572 | 1.926571  |
| H          | -2.275702      | -3.378621 | 2.509571  | H          | 2.785072       | -2.380993 | 2.705543  | H          | -1.706064      | 0.719928  | -0.165543 |
| H          | -2.593184      | -2.444859 | 3.986790  | H          | 3.420864       | -1.456389 | 4.091688  | H          | -0.961699      | -0.836802 | 0.268666  |
| H          | -0.725157      | -0.847180 | 3.257585  | H          | 1.746800       | 0.402635  | 3.592837  | H          | 1.071908       | -0.141531 | -1.097148 |
| H          | -0.855506      | -0.169022 | 1.617116  | H          | 1.692600       | 0.991659  | 1.903964  | H          | 1.816151       | 1.425908  | -0.697463 |
| H          | -0.541123      | -1.909865 | 1.837423  | H          | 1.147894       | -0.658889 | 2.297919  | H          | 0.216989       | 1.379531  | -1.457468 |
| <b>FA2</b> |                |           |           | <b>FA2</b> |                |           |           | <b>FA2</b> |                |           |           |
| E          | -5082.90212458 |           |           | E          | -5082.90406095 |           |           | E          | -5082.87868905 |           |           |
|            |                |           |           |            |                |           |           | ZPE        | -5081.312660   |           |           |
|            |                |           |           |            |                |           |           | H          | -5081.219726   |           |           |
|            |                |           |           |            |                |           |           | G          | -5081.446212   |           |           |
|            |                |           |           |            |                |           |           | S          | 476.680        |           |           |
| O          | 2.538861       | -4.799931 | -1.165955 | O          | 0.044422       | -5.774886 | -0.080923 | C          | 6.440932       | 2.419359  | 1.990630  |
| C          | 1.181232       | -4.424507 | -0.836979 | C          | -0.670296      | -4.648809 | -0.642435 | C          | 7.465529       | 1.748582  | 1.071162  |
| C          | 0.256401       | -5.398469 | -1.583005 | C          | -1.146441      | -5.071128 | -2.042723 | O          | 7.694198       | 2.573317  | -0.066486 |
| C          | 0.500096       | -5.293906 | -3.090803 | C          | 0.053373       | -5.459881 | -2.909720 | C          | 6.990733       | 0.361463  | 0.653930  |
| C          | 1.975179       | -5.510452 | -3.408756 | C          | 0.890596       | -6.528098 | -2.218612 | O          | 8.040356       | -0.217233 | -0.096545 |
| C          | 2.858490       | -4.613429 | -2.531913 | C          | 1.226396       | -6.106757 | -0.782398 | C          | 6.601854       | -0.484094 | 1.872212  |
| H          | 0.986755       | -3.409174 | -1.199950 | H          | 0.011605       | -3.797145 | -0.744605 | O          | 5.955204       | -1.647092 | 1.348865  |
| H          | 0.463552       | -6.424940 | -1.249182 | H          | -1.828295      | -5.928793 | -1.954412 | C          | 5.643784       | 0.305031  | 2.780479  |
| H          | 0.224505       | -4.273613 | -3.400577 | H          | 0.675269       | -4.559568 | -3.034455 | O          | 6.221457       | 1.578651  | 3.110861  |
| H          | 2.224597       | -6.553971 | -3.165368 | H          | 0.289252       | -7.447320 | -2.159081 | C          | 5.323077       | -0.363713 | 4.102986  |
| H          | 3.910643       | -4.902994 | -2.630075 | H          | 1.668136       | -6.946415 | -0.234326 | O          | 4.280654       | 0.403246  | 4.705911  |
| C          | 1.064556       | -4.404972 | 0.697882  | C          | -1.771198      | -4.258055 | 0.359941  | C          | 6.344512       | -2.931860 | 1.782451  |
| O          | -1.123199      | -5.089901 | -1.392780 | O          | -1.784890      | -4.007099 | -2.746361 | C          | 6.755332       | -3.769092 | 0.563442  |
| O          | -0.232416      | -6.260099 | -3.821678 | O          | -0.340549      | -5.980601 | -4.166003 | O          | 7.786898       | -3.094835 | -0.153792 |
| O          | 2.265595       | -5.243865 | -4.776279 | O          | 2.104077       | -6.781577 | -2.918366 | C          | 5.556172       | -4.043455 | -0.335302 |
| O          | 2.672732       | -3.279755 | -2.927371 | O          | 2.118493       | -5.023281 | -0.829924 | O          | 6.008619       | -4.907922 | -1.361016 |
| H          | 0.283246       | -5.085997 | 1.040053  | H          | -2.744783      | -4.220930 | -0.131280 | C          | 4.420581       | -4.642631 | 0.488818  |
| O          | 0.708818       | -3.119495 | 1.201628  | O          | -1.577493      | -2.965000 | 0.928176  | O          | 3.288052       | -4.762648 | -0.378437 |
| H          | 2.023663       | -4.740615 | 1.112558  | H          | -1.804617      | -5.029930 | 1.139578  | C          | 4.090743       | -3.743016 | 1.684928  |
| H          | -1.169205      | -6.195597 | -3.557016 | H          | -0.960400      | -5.348043 | -4.574776 | O          | 5.293079       | -3.574910 | 2.472984  |
| H          | 1.577496       | -5.694536 | -5.288222 | H          | 1.860304       | -6.870794 | -3.851845 | C          | 2.985640       | -4.306351 | 2.594732  |
| H          | 1.381049       | -2.460286 | 0.915414  | H          | -0.712784      | -2.937722 | 1.395741  | O          | 2.940370       | -5.719716 | 2.669598  |
| O          | 4.962319       | -0.508251 | -2.141327 | O          | 4.275974       | -3.966760 | 1.959193  | C          | 2.727666       | -6.035196 | -0.579262 |
| C          | 3.800820       | -1.340285 | -1.910934 | C          | 3.069190       | -3.930951 | 1.161590  | C          | 2.499081       | -6.251331 | -2.075387 |
| C          | 3.810772       | -2.421755 | -3.002082 | C          | 3.222016       | -5.005211 | 0.073869  | O          | 3.745418       | -6.126610 | -2.755829 |
| C          | 3.734491       | -1.760998 | -4.381118 | C          | 4.453405       | -4.707820 | -0.785089 | C          | 1.477828       | -5.257429 | -2.611164 |
| C          | 4.845958       | -0.730579 | -4.547094 | C          | 5.692432       | -4.566023 | 0.091320  | O          | 1.263809       | -5.585603 | -3.970776 |
| C          | 4.885594       | 0.226103  | -3.347824 | C          | 5.435113       | -3.586278 | 1.243161  | C          | 0.196616       | -5.315149 | -1.782525 |
| H          | 2.894390       | -0.737320 | -2.031776 | H          | 2.981080       | -2.951340 | 0.679109  | O          | -0.593689      | -4.200240 | -2.201291 |
| H          | 4.734759       | -3.011742 | -2.925446 | H          | 3.337033       | -5.989761 | 0.548821  | C          | 0.491977       | -5.201574 | -0.275384 |



|   |           |           |           |   |          |           |           |   |           |           |           |
|---|-----------|-----------|-----------|---|----------|-----------|-----------|---|-----------|-----------|-----------|
| H | 2.767141  | -1.237992 | -4.441165 | H | 4.277217 | -3.747711 | -1.295119 | O | 1.495405  | -6.167550 | 0.117705  |
| H | 5.805933  | -1.267591 | -4.568523 | H | 5.905637 | -5.548383 | 0.538264  | C | -0.738722 | -5.423210 | 0.588529  |
| H | 5.791866  | 0.841265  | -3.380158 | H | 6.256027 | -3.627419 | 1.967720  | O | -1.375066 | -6.634154 | 0.197279  |
| C | 3.836363  | -1.822619 | -0.451311 | C | 1.873152 | -4.091115 | 2.118254  | C | -1.975526 | -2.443802 | -2.443802 |
| O | 3.868092  | -2.697387 | -5.434974 | O | 4.717445 | -5.737120 | -1.720569 | C | -2.267783 | -4.068587 | -3.918424 |
| O | 4.683859  | 0.033333  | -5.736933 | O | 6.817440 | -4.112356 | -0.653368 | O | -1.437800 | -4.874312 | -4.754079 |
| O | 3.737228  | 1.033665  | -3.385829 | O | 5.310439 | -2.293446 | 0.709525  | C | -2.047771 | -2.589594 | -4.206469 |
| H | 3.820426  | -2.912803 | -0.403204 | H | 1.272628 | -4.962111 | 1.850169  | O | -2.429316 | -2.373201 | -5.556091 |
| O | 2.688312  | -1.381029 | 0.276781  | O | 0.985003 | -2.978806 | 2.074578  | C | -2.840964 | -1.738194 | -3.216418 |
| H | 4.755934  | -1.468644 | 0.028716  | H | 2.270514 | -4.242149 | 3.130306  | O | -2.521729 | -0.367751 | -3.471028 |
| H | 3.211784  | -3.405146 | -5.294775 | H | 3.897421 | -5.912580 | -2.219133 | C | -2.462799 | -2.123818 | -1.781818 |
| H | 4.497450  | -0.605946 | -6.440661 | H | 6.841029 | -4.652536 | -1.457300 | O | -2.740529 | -3.535003 | -1.612947 |
| H | 2.733050  | -0.403522 | 0.368699  | H | 1.468396 | -2.170413 | 2.352274  | C | -3.213523 | -1.351040 | -0.692633 |
| O | 3.324545  | 4.189477  | -1.528573 | O | 5.635149 | 0.819985  | 2.644511  | O | -4.568747 | -1.082062 | -1.009355 |
| C | 3.238397  | 2.754061  | -1.689766 | C | 4.893464 | -0.268145 | 2.045395  | C | -3.506626 | 0.412044  | -4.103323 |
| C | 3.851673  | 2.417607  | -3.059466 | C | 5.924017 | -1.205475 | 1.398309  | C | -2.852146 | 1.291704  | -5.170298 |
| C | 3.088439  | 3.149662  | -4.165881 | C | 6.719545 | -0.443301 | 0.335414  | O | -2.160288 | 0.469199  | -6.104970 |
| C | 3.041187  | 4.646310  | -3.887268 | C | 7.344077 | 0.812839  | 0.932228  | C | -1.911492 | 2.306678  | -4.529967 |
| C | 2.547273  | 4.916423  | -2.459808 | C | 6.294699 | 1.633591  | 1.693667  | O | -1.453826 | 3.143528  | -5.574187 |
| H | 2.185932  | 2.448700  | -1.692976 | H | 4.240024 | 0.126506  | 1.259693  | C | -2.604479 | 3.085298  | -3.401736 |
| H | 4.907178  | 2.724175  | -3.075478 | H | 6.609420 | -1.584204 | 2.169496  | O | -2.566422 | 3.796771  | -2.720404 |
| H | 2.056617  | 2.764670  | -4.163862 | H | 6.010774 | -0.137507 | -0.450109 | C | -3.303004 | 2.109204  | -2.440856 |
| H | 4.066258  | 5.039111  | -3.959396 | H | 8.106376 | 0.499618  | 1.660993  | O | -4.179594 | 1.247017  | -3.183665 |
| H | 2.691401  | 5.971760  | -2.202711 | H | 6.778698 | 2.430166  | 2.269697  | C | -4.160019 | 2.738521  | -1.357216 |
| C | 3.914556  | 2.114200  | -0.465004 | C | 3.991423 | -0.877311 | 3.132661  | O | -4.521589 | 1.713184  | -0.439105 |
| O | 3.690344  | 2.974661  | -5.435724 | O | 7.771875 | -1.219332 | -0.207709 | C | -1.673680 | 5.187768  | -2.513708 |
| O | 2.190719  | 5.326597  | -4.803849 | O | 7.931881 | 1.636944  | -0.068350 | C | -0.457090 | 5.885893  | -3.131393 |
| O | 1.189361  | 4.569379  | -2.380014 | O | 5.390091 | 2.172414  | 0.765271  | O | -0.385366 | 5.586014  | -4.524708 |
| H | 4.648985  | 1.369264  | -0.774093 | H | 4.195238 | -1.942225 | 3.256904  | C | 0.823961  | 5.465014  | -2.422864 |
| O | 2.998316  | 1.425876  | 0.383409  | O | 2.608722 | -0.778257 | 2.804962  | O | 1.872063  | 6.219503  | -3.003056 |
| H | 4.437816  | 2.909726  | 0.081944  | H | 4.213296 | -0.369199 | 4.079989  | C | 0.691697  | 5.689558  | -0.920177 |
| H | 3.814667  | 2.018296  | -5.579948 | H | 7.396341 | -2.066091 | -0.513419 | O | 1.834643  | 5.076206  | -0.316172 |
| H | 2.425657  | 4.994506  | -5.683182 | H | 8.455306 | 1.044811  | -0.628755 | C | -0.598813 | 5.051176  | -0.375695 |
| H | 2.289682  | 2.043919  | 0.678011  | H | 2.358537 | 0.170843  | 2.745916  | O | -1.740102 | 5.494956  | -1.137579 |
| O | -1.119329 | 5.771989  | 0.223948  | O | 3.099371 | 4.982421  | 1.412149  | C | -0.849097 | 5.388830  | 1.085163  |
| C | -0.178020 | 4.833129  | -0.347058 | C | 3.459731 | 3.581737  | 1.364623  | O | -0.757221 | 6.798336  | 1.268827  |
| C | 0.301317  | 5.436944  | -1.675965 | C | 4.936684 | 3.513463  | 0.942419  | C | 2.552704  | 5.788290  | 0.671553  |
| C | -0.890860 | 5.651150  | -2.611602 | C | 5.122222 | 4.183208  | -0.421664 | C | 3.994777  | 5.998795  | 0.189994  |
| C | -1.962839 | 6.490380  | -1.926014 | C | 4.574653 | 5.604542  | -0.401438 | O | 3.988151  | 6.650599  | -1.079224 |
| C | -2.298988 | 5.919365  | -0.542407 | C | 3.144240 | 5.623588  | 0.152198  | C | 4.737327  | 4.671328  | 0.110818  |
| H | -0.688776 | 3.886499  | -0.554216 | H | 2.854887 | 3.075357  | 0.604129  | O | 6.076221  | 4.977297  | -0.242466 |
| H | 0.791760  | 6.401314  | -1.482025 | H | 5.556339 | 4.026700  | 1.691208  | C | 4.625161  | 3.932917  | 1.442154  |
| H | -1.316774 | 4.660757  | -2.836577 | H | 4.543956 | 3.600419  | -1.155638 | O | 5.253618  | 2.654609  | 1.280896  |
| H | -1.555721 | 7.500888  | -1.773061 | H | 5.198837 | 6.201367  | 0.280041  | C | 3.152460  | 3.769159  | 1.834690  |
| H | -2.928167 | 6.621447  | 0.016005  | H | 2.820464 | 6.654399  | 0.334294  | O | 2.555761  | 5.086298  | 1.896309  |
| C | 0.905183  | 4.553251  | 0.711253  | C | 3.108154 | 2.966578  | 2.732261  | C | 2.939020  | 3.085870  | 3.192519  |
| O | -0.526217 | 6.327314  | -3.801111 | O | 6.484713 | 4.261452  | -0.799009 | O | 3.918497  | 3.414756  | 4.161267  |
| O | -3.156975 | 6.555438  | -2.698051 | O | 4.571894 | 6.187002  | -1.700197 | H | 6.842567  | 3.351601  | 2.398952  |
| O | -2.959032 | 4.692196  | -0.714611 | O | 2.298346 | 6.495906  | -0.776338 | H | 8.396282  | 1.636620  | 1.646249  |
| H | 1.896484  | 4.805944  | 0.330587  | H | 3.975093 | 2.462966  | 3.163359  | H | 8.166386  | 2.021722  | -0.708284 |

|   |           |           |           |   |           |           |           |   |           |           |           |
|---|-----------|-----------|-----------|---|-----------|-----------|-----------|---|-----------|-----------|-----------|
| O | 0.965023  | 3.179639  | 1.075267  | O | 2.084885  | 1.978845  | 2.648022  | H | 6.083696  | 0.480903  | 0.041175  |
| H | 0.697262  | 5.186873  | 1.583198  | H | 2.814307  | 3.784920  | 3.402632  | H | 7.831489  | -1.159233 | -0.254548 |
| H | 0.233105  | 5.859041  | -4.195702 | H | 6.868052  | 3.366899  | -0.734520 | H | 7.509995  | -0.764928 | 2.423798  |
| H | -2.878606 | 6.753553  | -3.604614 | H | 5.443437  | 5.997738  | -2.078858 | H | 4.705841  | 0.456057  | 2.232178  |
| H | 0.112785  | 2.918707  | 1.489603  | H | 1.276036  | 2.384057  | 2.262291  | H | 6.227259  | -0.370940 | 4.729035  |
| O | -4.986356 | 3.008378  | 1.855026  | O | -1.359752 | 5.395437  | -0.869353 | H | 5.009470  | -1.400069 | 3.922794  |
| C | -3.763838 | 3.262190  | 1.122914  | C | -0.131354 | 4.747773  | -0.463935 | H | 4.157515  | 0.102285  | 5.614371  |
| C | -4.072005 | 4.389153  | 0.124853  | C | 1.023358  | 5.576081  | -1.046650 | H | 7.173214  | -2.862307 | 2.495853  |
| C | -5.191866 | 3.950449  | -0.822150 | C | 0.910478  | 5.620360  | -2.572540 | H | 7.132188  | -4.732041 | 0.936742  |
| C | -6.416577 | 3.504874  | -0.031926 | C | -0.463630 | 6.128766  | -2.993624 | H | 7.867623  | -3.571185 | -0.995051 |
| C | -6.025018 | 2.488207  | 1.048574  | C | -1.576837 | 5.362373  | -2.266985 | H | 5.205727  | -3.086605 | -0.752548 |
| H | -3.482817 | 2.364104  | 0.562230  | H | -0.091221 | 3.742112  | -0.896802 | H | 5.246313  | -5.161241 | -1.917325 |
| H | -4.386173 | 5.287550  | 0.674571  | H | 0.980254  | 6.598325  | -0.645167 | H | 4.712553  | -5.628013 | 0.868299  |
| H | -4.818604 | 3.088669  | -1.397357 | H | 1.026268  | 4.589121  | -2.941686 | H | 3.774264  | -2.756233 | 1.323713  |
| H | -6.828891 | 4.386279  | 0.481313  | H | -0.541779 | 7.183395  | -2.690296 | H | 2.024500  | -3.897908 | 2.256346  |
| H | -6.866613 | 2.310843  | 1.727535  | H | -2.542707 | 5.854305  | -2.427026 | H | 3.167250  | -3.921290 | 3.603985  |
| C | -2.647435 | 3.533950  | 2.148225  | C | -0.165768 | 4.594028  | 1.067698  | H | 2.330115  | -6.023451 | 1.977061  |
| O | -5.605427 | 4.993470  | -1.686114 | O | 1.873329  | 6.477929  | -3.157422 | H | 3.378051  | -6.815948 | -0.172440 |
| O | -7.404909 | 2.921649  | -0.874249 | O | -0.664838 | 6.006375  | -4.397228 | H | 2.099809  | -7.266861 | -2.207410 |
| O | -5.638578 | 1.294994  | 0.417009  | O | -1.606302 | 4.045291  | -2.753284 | H | 3.525941  | -6.058927 | -3.697617 |
| H | -2.189631 | 4.509149  | 1.972944  | H | 0.698236  | 5.075108  | 1.529171  | H | 1.896593  | -4.243941 | -2.511648 |
| O | -1.592135 | 2.583105  | 2.064824  | O | -0.119420 | 3.230376  | 1.475603  | H | 0.424814  | -5.177575 | -4.263731 |
| H | -3.100490 | 3.539821  | 3.148192  | H | -1.074821 | 5.087737  | 1.435438  | H | -0.324614 | -6.257214 | -1.981271 |
| H | -4.814317 | 5.345701  | -2.135050 | H | 2.750460  | 6.228909  | -2.810874 | H | 0.871826  | -4.191528 | -0.075953 |
| H | -7.494439 | 3.518395  | -1.632273 | H | 0.136529  | 6.356634  | -4.813989 | H | -1.404136 | -4.560835 | 0.450442  |
| H | -1.941328 | 1.696464  | 2.303038  | H | -0.891947 | 2.758735  | 1.091173  | H | -0.422430 | -5.455649 | 1.641981  |
| O | -5.440408 | -1.991346 | 2.065108  | O | -4.451568 | 1.739389  | -2.373071 | H | -2.194759 | -6.714201 | 0.700466  |
| C | -4.901277 | -0.723724 | 1.620265  | C | -3.185348 | 2.317341  | -1.979441 | H | -2.275177 | -5.401880 | -2.187322 |
| C | -6.060276 | 0.051729  | 0.974852  | C | -2.872194 | 3.430862  | -2.991002 | H | -3.324747 | -4.306229 | -4.106843 |
| C | -6.626565 | -0.746509 | -0.202238 | C | -2.781943 | 2.837689  | -4.399430 | H | -1.533569 | -4.493734 | -5.641834 |
| C | -7.019062 | -2.151295 | 0.239195  | C | -4.052026 | 2.064632  | -4.736877 | H | -0.980215 | -2.363612 | -4.065224 |
| C | -5.870276 | -2.821459 | 1.004477  | C | -4.399934 | 1.072509  | -3.619132 | H | -2.180330 | -1.462328 | -5.804318 |
| H | -4.134481 | -0.901762 | 0.858461  | H | -2.401420 | 1.554814  | -2.045513 | H | -3.916712 | -1.904145 | -3.337161 |
| H | -6.850425 | 0.219680  | 1.720228  | H | -3.670051 | 4.186115  | -2.960634 | H | -1.387600 | -1.962851 | -1.628556 |
| H | -5.827646 | -0.831772 | -0.955542 | H | -1.935322 | 2.133308  | -4.407323 | H | -2.675833 | -0.416539 | -0.500459 |
| H | -7.868437 | -2.065180 | 0.932995  | H | -4.880082 | 2.785886  | -4.803171 | H | -3.160393 | -1.955770 | 0.222804  |
| H | -6.216393 | -3.748744 | 1.474695  | H | -5.402822 | 0.659806  | -3.775174 | H | -4.658042 | -0.109514 | -1.056209 |
| C | -4.210630 | -0.057028 | 2.823894  | C | -3.301685 | 2.737347  | -0.503857 | H | -4.277539 | -0.223962 | -4.548896 |
| O | -7.780399 | -0.140958 | -0.756272 | O | -2.619633 | 3.834000  | -5.392383 | H | -3.657930 | 1.841355  | -5.678411 |
| O | -7.372476 | -2.972672 | -0.868588 | O | -3.925783 | 1.349397  | -5.960956 | H | -1.593058 | 1.062943  | -6.619305 |
| O | -4.826481 | -3.084379 | 0.101995  | O | -3.438254 | 0.049332  | -3.615411 | H | -1.077315 | 1.754286  | -4.070071 |
| H | -4.608117 | 0.945402  | 2.991197  | H | -3.092806 | 3.801749  | -0.384005 | H | -0.942708 | 3.881677  | -5.185932 |
| O | -2.810936 | 0.104732  | 2.627061  | O | -2.360380 | 2.058861  | 0.325885  | H | -3.330575 | 3.787167  | -3.835352 |
| H | -4.420539 | -0.664871 | 3.713847  | H | -4.328677 | 2.544872  | -0.170219 | H | -2.524549 | 1.510719  | -1.952200 |
| H | -7.566176 | 0.789496  | -0.955899 | H | -1.863949 | 4.395021  | -5.136655 | H | -5.047576 | 3.188539  | -1.825484 |
| H | -7.971829 | -2.441239 | -1.413649 | H | -3.547051 | 1.973746  | -6.597603 | H | -3.590674 | 3.535825  | -0.860614 |
| H | -2.394048 | -0.780653 | 2.550705  | H | -2.540839 | 1.092501  | 0.297948  | H | -5.410753 | 1.904062  | -0.036214 |
| O | -2.089964 | -5.479133 | 0.690800  | O | -3.847956 | -3.231777 | -1.996557 | H | -2.602059 | 5.571730  | -2.951078 |
| C | -2.714438 | -4.175000 | 0.747726  | C | -3.426284 | -1.848329 | -2.045158 | H | -0.591582 | 6.967826  | -2.992973 |
| C | -4.137217 | -4.330104 | 0.186855  | C | -3.866411 | -1.296007 | -3.409948 | H | 0.492410  | 5.887352  | -4.807231 |

|   |           |           |           |   |           |           |           |   |           |           |           |
|---|-----------|-----------|-----------|---|-----------|-----------|-----------|---|-----------|-----------|-----------|
| C | -4.077969 | -4.855041 | -1.249653 | C | -3.204586 | -2.105561 | -4.528410 | H | 0.975887  | 4.387438  | -2.591306 |
| C | -3.266045 | -6.142435 | -1.316729 | C | -3.493547 | -3.592733 | -4.361814 | H | 2.644408  | 6.197608  | -2.403737 |
| C | -1.908509 | -5.964969 | -0.624455 | C | -3.176317 | -4.052007 | -2.932296 | H | 0.677368  | 6.764425  | -0.712463 |
| H | -2.161666 | -3.477644 | 0.108194  | H | -2.333064 | -1.800444 | -1.991436 | H | -0.511767 | 3.960129  | -0.460390 |
| H | -4.703831 | -5.034652 | 0.812017  | H | -4.959504 | -1.364192 | -3.500317 | H | -0.094442 | 4.862555  | 1.683603  |
| H | -3.567950 | -4.091993 | -1.858428 | H | -2.117093 | -1.953822 | -4.442842 | H | -1.844617 | 5.011336  | 1.361167  |
| H | -3.815305 | -6.920482 | -0.766134 | H | -4.569967 | -3.750645 | -4.524864 | H | -0.751405 | 6.972346  | 2.217963  |
| H | -1.409834 | -6.934356 | -0.514265 | H | -3.555880 | -5.066234 | -2.765168 | H | 2.063129  | 6.744278  | 0.880254  |
| C | -2.603238 | -3.675065 | 2.199110  | C | -3.979206 | -1.142411 | -0.795301 | H | 4.502869  | 6.634629  | 0.929296  |
| O | -5.363786 | -5.140044 | -1.769294 | O | -3.667188 | -1.727221 | -5.811983 | H | 4.899946  | 6.578529  | -1.403501 |
| O | -3.045127 | -6.557457 | -2.660390 | O | -2.738258 | -4.381858 | -5.274555 | H | 4.260916  | 4.051330  | -0.663937 |
| H | -3.582907 | -3.395791 | 2.589945  | H | -4.566074 | -0.264740 | -1.070538 | H | 6.568853  | 4.141333  | -0.349978 |
| O | -1.792167 | -2.510094 | 2.321854  | O | -2.936537 | -0.666780 | 0.054404  | H | 5.123907  | 4.498067  | 2.236359  |
| H | -2.208213 | -4.498512 | 2.808283  | H | -4.634047 | -1.842883 | -0.262594 | H | 2.627394  | 3.186125  | 1.066472  |
| H | -5.924884 | -4.353425 | -1.635416 | H | -3.561904 | -0.761345 | -5.897474 | H | 2.896993  | 2.002903  | 3.036972  |
| H | -3.902701 | -6.488274 | -3.105915 | H | -2.834423 | -3.954915 | -6.138971 | H | 1.952822  | 3.403951  | 3.556198  |
| H | -0.896548 | -2.696113 | 1.963255  | H | -2.412572 | -1.431119 | 0.382721  | H | 4.455296  | 2.617877  | 4.296977  |
| C | 3.979721  | 3.853815  | 5.701087  | C | -6.889931 | -3.138189 | 3.956213  | C | -7.970176 | -4.023916 | 2.481080  |
| C | 4.092946  | 3.723161  | 4.318364  | C | -5.839026 | -3.363411 | 3.068364  | C | -7.246343 | -3.613701 | 1.362998  |
| C | 4.102649  | 2.451803  | 3.748140  | C | -4.774367 | -2.465715 | 3.022726  | C | -6.732129 | -2.319066 | 1.308593  |
| C | 4.010708  | 1.292612  | 4.531416  | C | -4.727077 | -1.336495 | 3.854439  | C | -6.936163 | -1.411491 | 2.359344  |
| C | 3.858022  | 1.427300  | 5.925355  | C | -5.795349 | -1.103634 | 4.740205  | C | -7.645647 | -1.832737 | 3.500129  |
| C | 3.848466  | 2.710014  | 6.486570  | C | -6.862131 | -2.010649 | 4.774238  | C | -8.151794 | -3.137456 | 3.541011  |
| C | 3.574901  | 0.220439  | 6.802287  | C | -5.854613 | 0.160537  | 5.577185  | C | -7.768067 | -0.941525 | 4.722636  |
| C | 2.317559  | -0.466132 | 6.321668  | C | -5.840584 | 1.375028  | 4.680490  | C | -6.394311 | -0.583876 | 5.238162  |
| C | 1.110721  | -0.401191 | 7.016539  | C | -6.964836 | 2.176883  | 4.489430  | C | -5.877961 | -1.107312 | 6.422456  |
| C | -0.040224 | -1.018363 | 6.519560  | C | -6.922569 | 3.292728  | 3.649782  | C | -4.600377 | -0.760423 | 6.869241  |
| C | 0.017431  | -1.703835 | 5.307896  | C | -5.738171 | 3.600071  | 2.983918  | C | -3.825713 | 0.115598  | 6.112735  |
| C | 1.218048  | -1.776321 | 4.597808  | C | -4.606342 | 2.799152  | 3.151734  | C | -4.321320 | 0.637051  | 4.915815  |
| C | 2.373817  | -1.157528 | 5.092852  | C | -4.642405 | 1.681286  | 3.998881  | C | -5.604194 | 0.294965  | 4.466480  |
| C | 4.173382  | -0.032200 | 3.788537  | C | -3.449809 | -0.503418 | 3.768655  | C | -6.430147 | 0.010518  | 2.118505  |
| N | 3.639971  | -1.244428 | 4.449220  | N | -3.498794 | 0.887141  | 4.279050  | N | -6.194302 | 0.865090  | 3.305224  |
| C | 5.676865  | -0.258510 | 3.516783  | C | -2.327704 | -1.250056 | 4.520189  | C | -7.442993 | 0.733246  | 1.203772  |
| C | 3.851971  | -2.423256 | 3.607457  | C | -2.202507 | 1.543541  | 4.084885  | C | -5.690073 | 2.176340  | 2.901741  |
| C | 5.343034  | -2.627414 | 3.358378  | C | -1.101029 | 0.788882  | 4.822030  | C | -6.716820 | 2.882829  | 2.022117  |
| N | 5.911258  | -1.451106 | 2.704897  | N | -1.036373 | -0.592979 | 4.360380  | N | -6.986838 | 2.080898  | 0.820893  |
| C | 7.325871  | -1.625318 | 2.408005  | C | 0.025289  | -1.339661 | 5.020618  | C | -7.958323 | 2.734396  | -0.059339 |
| H | 3.970322  | 4.836436  | 6.164177  | H | -7.729520 | -3.825799 | 4.004422  | H | -8.376854 | -5.029669 | 2.537800  |
| H | 4.164477  | 4.602641  | 3.684966  | H | -5.847080 | -4.229654 | 2.412922  | H | -7.074885 | -4.296265 | 0.535755  |
| H | 4.162997  | 2.345286  | 2.668294  | H | -3.949590 | -2.641974 | 2.336178  | H | -6.154906 | -2.004765 | 0.440828  |
| H | 3.722909  | 2.807941  | 7.562103  | H | -7.688446 | -1.819050 | 5.454430  | H | -8.690889 | -3.461261 | 4.427890  |
| H | 3.462984  | 0.539916  | 7.842696  | H | -6.758204 | 0.152279  | 6.193956  | H | -8.342575 | -1.456755 | 5.497820  |
| H | 4.408383  | -0.490752 | 6.753165  | H | -4.987621 | 0.208520  | 6.247701  | H | -8.301339 | -0.016806 | 4.468858  |
| H | 1.074181  | 0.134258  | 7.962347  | H | -7.882147 | 1.932574  | 5.019814  | H | -6.492243 | -1.784038 | 7.011234  |
| H | -0.972136 | -0.958712 | 7.074253  | H | -7.804341 | 3.913711  | 3.522396  | H | -4.219190 | -1.168481 | 7.800467  |
| H | -0.870555 | -2.165696 | 4.887020  | H | -5.689656 | 4.463196  | 2.325369  | H | -2.829617 | 0.393120  | 6.445761  |
| H | 1.241518  | -2.304532 | 3.650342  | H | -3.697690 | 3.033315  | 2.609102  | H | -3.701636 | 1.307141  | 4.329347  |
| H | 3.687532  | 0.084820  | 2.804857  | H | -3.161974 | -0.474434 | 2.704201  | H | -5.490062 | -0.078635 | 1.548654  |
| H | 6.201684  | -0.314267 | 4.490879  | H | -2.623265 | -1.338070 | 5.585354  | H | -8.416078 | 0.781832  | 1.722891  |
| H | 6.071732  | 0.609700  | 2.979893  | H | -2.249687 | -2.263154 | 4.114220  | H | -7.576761 | 0.145836  | 0.291393  |

|            |                |           |           |            |                |           |           |            |                |           |           |
|------------|----------------|-----------|-----------|------------|----------------|-----------|-----------|------------|----------------|-----------|-----------|
| H          | 3.339608       | -2.336036 | 2.636102  | H          | -1.932377      | 1.615122  | 3.019611  | H          | -4.738582      | 2.109051  | 2.345725  |
| H          | 3.448838       | -3.294573 | 4.131446  | H          | -2.270067      | 2.560312  | 4.481559  | H          | -5.517941      | 2.774231  | 3.800425  |
| H          | 5.487724       | -3.496979 | 2.705921  | H          | -0.138596      | 1.273080  | 4.617235  | H          | -6.328881      | 3.859333  | 1.710395  |
| H          | 5.846203       | -2.842273 | 4.321643  | H          | -1.288141      | 0.849618  | 5.913105  | H          | -7.641903      | 3.051232  | 2.600253  |
| H          | 7.946584       | -1.771112 | 3.312861  | H          | -0.118997      | -1.421188 | 6.115698  | H          | -8.940919      | 2.864968  | 0.423952  |
| H          | 7.704433       | -0.745812 | 1.877333  | H          | 0.074806       | -2.349057 | 4.601424  | H          | -8.095634      | 2.135019  | -0.963749 |
| H2         | 7.462681       | -2.498071 | 1.760973  | H2         | 0.987449       | -0.857107 | 4.829455  | H2         | -7.585517      | 3.721020  | -0.350605 |
| <b>FV2</b> |                |           |           | <b>FV2</b> |                |           |           | <b>FV2</b> |                |           |           |
| E          | -5082.90050825 |           |           | E          | -5082.90058173 |           |           | E          | -5082.86908923 |           |           |
| O          | 5.342962       | 0.536802  | -1.503981 | O          | -4.882643      | 3.273028  | 1.129955  | C          | 5.293376       | 4.645297  | 0.924414  |
| C          | 4.363081       | -0.526661 | -1.447753 | C          | -3.573491      | 3.453928  | 0.541765  | C          | 6.516722       | 4.166111  | 0.138617  |
| C          | 4.694809       | -1.500157 | -2.590754 | C          | -3.712640      | 4.539780  | -0.536886 | O          | 6.479883       | 4.713661  | -1.174936 |
| C          | 4.639902       | -0.764919 | -3.932437 | C          | -4.727270      | 4.088941  | -1.590973 | C          | 6.567163       | 2.643674  | 0.093515  |
| C          | 5.542096       | 0.462359  | -3.913166 | C          | -6.053813      | 3.716349  | -0.939417 | O          | 7.773879       | 2.299423  | -0.557960 |
| C          | 5.258131       | 1.323845  | -2.675824 | C          | -5.834889      | 2.744163  | 0.227831  | C          | 6.462901       | 2.042658  | 1.499413  |
| H          | 3.363916       | -0.112309 | -1.623019 | H          | -3.260381      | 2.523061  | 0.055779  | O          | 6.277454       | 0.637114  | 1.312800  |
| H          | 5.700372       | -1.917307 | -2.439505 | H          | -4.050817      | 5.478184  | -0.075289 | C          | 5.264473       | 2.646321  | 2.251816  |
| H          | 3.601737       | -0.427878 | -4.079132 | H          | -4.316890      | 3.189891  | -2.077149 | O          | 5.342522       | 4.083384  | 2.227228  |
| H          | 6.584544       | 0.118332  | -3.841093 | H          | -6.496663      | 4.632913  | -0.522163 | C          | 5.178962       | 2.253154  | 3.714072  |
| H          | 6.025744       | 2.098329  | -2.567982 | H          | -6.758941      | 2.630862  | 0.805608  | O          | 3.918879       | 2.716825  | 4.193392  |
| C          | 4.386843       | -1.105471 | -0.021827 | C          | -2.584689      | 3.735722  | 1.685032  | C          | 7.090426       | -0.284444 | 2.006260  |
| O          | 3.738069       | -2.552224 | -2.705203 | O          | -2.499121      | 4.753787  | -1.255298 | C          | 7.793013       | -1.196787 | 0.991386  |
| O          | 5.062174       | -1.582378 | -5.008781 | O          | -4.994261      | 5.100950  | -2.544557 | O          | 8.533415       | -0.404868 | 0.065439  |
| O          | 5.368976       | 1.261481  | -5.078350 | O          | -6.949234      | 3.119056  | -1.870602 | C          | 6.784651       | -2.080530 | 0.268013  |
| O          | 3.986975       | 1.903630  | -2.815215 | O          | -5.419027      | 1.506506  | -0.288208 | O          | 7.532929       | -2.951341 | -0.560119 |
| H          | 4.500943       | -2.190285 | -0.048346 | H          | -2.018403      | 4.648133  | 1.493240  | C          | 5.927513       | -2.820441 | 1.290306  |
| O          | 3.179951       | -0.857282 | 0.694645  | O          | -1.617095      | 2.698070  | 1.832687  | O          | 4.925484       | -3.544045 | 0.568092  |
| H          | 5.252807       | -0.679336 | 0.501534  | H          | -3.162770      | 3.871944  | 2.608014  | C          | 5.276780       | -1.832238 | 2.263684  |
| H          | 4.548706       | -2.410974 | -4.977364 | H          | -4.140752      | 5.411622  | -2.899562 | O          | 6.324741       | -1.064281 | 2.901271  |
| H          | 5.386793       | 0.647325  | -5.827537 | H          | -6.930349      | 3.682048  | -2.658844 | C          | 4.434934       | -2.512512 | 3.356426  |
| H          | 3.040510       | 0.113528  | 0.767926  | H          | -2.077234      | 1.851000  | 2.034022  | O          | 4.912440       | -3.778849 | 3.772875  |
| O          | 2.828890       | 4.854419  | -0.938411 | O          | -5.570306      | -1.692775 | 1.533018  | C          | 4.900871       | -4.944021 | 0.684571  |
| C          | 3.016177       | 3.434647  | -1.145351 | C          | -4.930352      | -0.467179 | 1.107163  | C          | 4.768217       | -5.562121 | -0.707150 |
| C          | 3.810527       | 3.272039  | -2.451014 | C          | -5.960529      | 0.310339  | 0.271233  | O          | 5.863985       | -5.134077 | -1.511580 |
| C          | 3.042898       | 3.904034  | -3.614164 | C          | -6.401233      | -0.531818 | -0.928605 | C          | 3.438027       | -5.179302 | -1.341462 |
| C          | 2.698996       | 5.355028  | -3.301343 | C          | -6.910017      | -1.892865 | -0.470581 | O          | 3.374212       | -5.855030 | -2.582491 |
| C          | 2.026893       | 5.470099  | -1.927093 | C          | -5.897127      | -2.562750 | 0.466622  | C          | 2.287408       | -5.544976 | -0.406605 |
| H          | 2.040215       | 2.951092  | -1.264093 | H          | -4.071635      | -0.706697 | 0.469916  | O          | 1.109995       | -4.956418 | -0.964575 |
| H          | 4.788196       | 3.763896  | -2.348115 | H          | -6.834592      | 0.546818  | 0.894255  | C          | 2.515301       | -4.988263 | 1.011091  |
| H          | 2.102811       | 3.342882  | -3.733518 | H          | -5.515759      | -0.689146 | -1.564206 | O          | 3.820648       | -5.371071 | 1.504465  |
| H          | 3.638997       | 5.924630  | -3.254941 | H          | -7.834343      | -1.734856 | 0.104642  | C          | 1.477232       | -5.473990 | 2.009460  |
| H          | 1.949338       | 6.521967  | -1.630191 | H          | -6.341319      | -3.448091 | 0.934947  | O          | 1.387410       | -6.892048 | 1.938046  |
| C          | 3.673122       | 2.865684  | 0.124977  | C          | -4.400216      | 0.235247  | 2.370380  | C          | -0.066977      | -5.734021 | -1.073443 |
| O          | 3.791590       | 3.898859  | -4.816093 | O          | -7.446043      | 0.083383  | -1.659918 | C          | -0.452528      | -5.853354 | -2.553772 |
| O          | 1.834953       | 5.916356  | -4.283573 | O          | -7.160619      | -2.759910 | -1.571187 | O          | 0.638456       | -6.398829 | -3.294274 |
| O          | 0.754338       | 4.881544  | -1.999341 | O          | -4.760521      | -2.914404 | -0.278286 | C          | -0.859766      | -4.497537 | -3.114886 |
| H          | 4.591105       | 2.328751  | -0.118816 | H          | -4.772636      | 1.259219  | 2.431466  | O          | -1.290988      | -4.724597 | -4.445634 |
| O          | 2.844330       | 1.926493  | 0.802326  | O          | -2.978443      | 0.336719  | 2.389983  | C          | -1.942171      | -3.875194 | -2.237288 |
| H          | 3.929764       | 3.710246  | 0.777625  | H          | -4.767971      | -0.320240 | 3.242576  | O          | -2.205148      | -2.563600 | -2.751463 |
| H          | 4.116822       | 2.991618  | -4.966035 | H          | -7.169403      | 0.993356  | -1.875913 | C          | -1.476331      | -3.804866 | -0.777593 |

|   |           |           |           |   |           |           |           |   |           |           |           |
|---|-----------|-----------|-----------|---|-----------|-----------|-----------|---|-----------|-----------|-----------|
| H | 2.210668  | 5.670854  | -5.142164 | H | -7.658978 | -2.236146 | -2.216157 | O | -1.126414 | -5.144543 | -0.351058 |
| H | 2.001247  | 2.362869  | 1.061185  | H | -2.581936 | -0.561996 | 2.312930  | C | -2.537014 | -3.257143 | 0.193695  |
| O | -1.985294 | 5.488583  | 0.383667  | O | -2.246408 | -5.391525 | 0.766016  | O | -3.877126 | -3.525149 | -0.198319 |
| C | -0.841809 | 4.762971  | -0.126994 | C | -2.778063 | -4.051459 | 0.641885  | C | -3.480417 | -2.305876 | -3.276759 |
| C | -0.338318 | 5.535840  | -1.355844 | C | -4.150345 | -4.181744 | -0.036651 | C | -3.350195 | -1.566244 | -4.610293 |
| C | -1.445928 | 5.622120  | -2.408808 | C | -3.989637 | -4.831571 | -1.413387 | O | -2.558697 | -2.338105 | -5.507390 |
| C | -2.708451 | 6.225127  | -1.804454 | C | -3.255179 | -6.161915 | -1.293204 | C | -2.748823 | -0.180537 | -4.407752 |
| C | -3.085432 | 5.502457  | -0.504998 | C | -1.964532 | -5.998558 | -0.480236 | O | -2.760211 | 0.445440  | -5.675011 |
| H | -1.157635 | 3.762884  | -0.443070 | H | -2.121197 | -3.458401 | -0.003533 | C | -3.521032 | 0.607354  | -3.342173 |
| H | -0.043762 | 6.550024  | -1.051251 | H | -4.807300 | -4.803430 | 0.587735  | O | -2.751148 | 1.779870  | -3.065013 |
| H | -1.673575 | 4.595208  | -2.734955 | H | -3.379195 | -4.153054 | -2.029687 | C | -3.663152 | -0.237426 | -2.066465 |
| H | -2.494769 | 7.273130  | -1.547015 | H | -3.903719 | -6.858750 | -0.741751 | O | -4.255410 | -1.513526 | -2.390817 |
| H | -3.879849 | 6.047324  | 0.017195  | H | -1.537735 | -6.979187 | -0.241808 | C | -4.532423 | 0.362384  | -0.975527 |
| C | 0.158812  | 4.589771  | 1.031478  | C | -2.757736 | -3.404017 | 2.039001  | O | -4.320597 | -0.415412 | 0.194349  |
| O | -1.079258 | 6.433180  | -3.510153 | O | -5.235285 | -5.094771 | -2.033173 | C | -3.329436 | 3.058062  | -3.223234 |
| O | -3.809702 | 6.156892  | -2.703955 | O | -2.928405 | -6.702094 | -2.568936 | C | -2.452142 | 3.896551  | -4.159198 |
| O | -3.506187 | 4.201979  | -0.826992 | O | -1.058913 | -5.233984 | -1.232994 | O | -2.321798 | 3.241655  | -5.420053 |
| H | 1.121219  | 5.041951  | 0.784431  | H | -3.761646 | -3.100712 | 2.341946  | C | -1.084676 | 4.147024  | -3.536372 |
| O | 0.429817  | 3.222367  | 1.315354  | O | -1.963251 | -2.223696 | 2.073804  | O | -0.380179 | 4.982980  | -4.435788 |
| H | -0.250175 | 5.105164  | 1.910216  | H | -2.391096 | -4.150385 | 2.754991  | C | -1.250641 | 4.767293  | -2.153177 |
| H | -0.222393 | 6.114030  | -3.850094 | H | -5.754077 | -4.268701 | -2.034574 | O | 0.048743  | 4.789842  | -1.555195 |
| H | -3.473753 | 6.461667  | -3.560074 | H | -3.732884 | -6.628062 | -3.103731 | C | -2.215866 | 3.937782  | -1.287472 |
| H | -0.397558 | 2.787875  | 1.617555  | H | -1.023990 | -2.463720 | 1.914900  | O | -3.459505 | 3.720550  | -1.984711 |
| O | -5.468316 | 2.007705  | 1.380750  | O | 2.566536  | -5.068127 | -0.619688 | C | -2.536248 | 4.608077  | 0.038928  |
| C | -4.239461 | 2.517238  | 0.810155  | C | 1.200554  | -4.613078 | -0.469870 | O | -2.941883 | 5.952437  | -0.198583 |
| C | -4.632225 | 3.655878  | -0.143013 | C | 0.317673  | -5.607900 | -1.239179 | C | 0.486494  | 5.973873  | -0.918507 |
| C | -5.554110 | 3.115216  | -1.239165 | C | 0.725616  | -5.625253 | -2.714762 | C | 1.756685  | 6.478540  | -1.616430 |
| C | -6.756970 | 2.405698  | -0.627892 | C | 2.215242  | -5.914261 | -2.858414 | O | 1.503832  | 6.648315  | -3.010401 |
| C | -6.308757 | 1.386372  | 0.428047  | C | 3.039097  | -4.991455 | -1.950429 | C | 2.917980  | 5.519060  | -1.390742 |
| H | -3.755661 | 1.726914  | 0.226143  | H | 1.093805  | -3.624554 | -0.929606 | O | 4.058538  | 6.121287  | -1.978544 |
| H | -5.151564 | 4.443435  | 0.420869  | H | 0.438592  | -6.612937 | -0.811084 | C | 3.087466  | 5.253041  | 0.102350  |
| H | -4.976872 | 2.378668  | -1.819884 | H | 0.527610  | -4.621170 | -3.121748 | O | 4.124253  | 4.272706  | 0.245894  |
| H | -7.371709 | 3.159951  | -0.114594 | H | 2.394484  | -6.947003 | -2.524298 | C | 1.771730  | 4.751103  | 0.707674  |
| H | -7.172705 | 1.015357  | 0.990816  | H | 4.082265  | -5.325093 | -1.914601 | O | 0.751606  | 5.744770  | 0.449133  |
| C | -3.289170 | 2.877174  | 1.966551  | C | 0.916868  | -4.452169 | 1.034871  | C | 1.833355  | 4.515557  | 2.225525  |
| O | -6.052050 | 4.141215  | -2.078451 | O | 0.031597  | -6.614762 | -3.452557 | O | 2.698863  | 5.402037  | 2.914022  |
| O | -7.530149 | 1.732172  | -1.615304 | O | 2.657574  | -5.749515 | -4.201340 | H | 5.330252  | 5.728624  | 1.073480  |
| O | -5.652607 | 0.329928  | -0.224914 | O | 2.955557  | -3.682137 | -2.451174 | H | 7.409643  | 4.526562  | 0.669927  |
| H | -2.989617 | 3.925149  | 1.911156  | H | 0.042945  | -5.036395 | 1.327813  | H | 7.135145  | 4.217584  | -1.688835 |
| O | -2.084737 | 2.119975  | 1.923768  | O | 0.626859  | -3.105035 | 1.390080  | H | 5.693357  | 2.289343  | -0.475089 |
| H | -3.825243 | 2.720771  | 2.911433  | H | 1.786669  | -4.832046 | 1.586608  | H | 7.910790  | 1.334422  | -0.478477 |
| H | -5.292071 | 4.654981  | -2.410204 | H | -0.923321 | -6.493692 | -3.295069 | H | 7.395972  | 2.237414  | 2.046585  |
| H | -7.646098 | 2.365071  | -2.339694 | H | 2.010843  | -6.213678 | -4.753596 | H | 4.346494  | 2.319577  | 1.748488  |
| H | -2.298913 | 1.176310  | 2.083787  | H | 1.427796  | -2.556060 | 1.244260  | H | 6.012737  | 2.721904  | 4.257510  |
| O | -5.035566 | -2.992381 | 1.240497  | O | 5.279229  | -0.956593 | -1.586942 | H | 5.270621  | 1.162555  | 3.802390  |
| C | -4.701185 | -1.614535 | 0.951017  | C | 4.090622  | -1.761513 | -1.403236 | H | 3.903111  | 2.633189  | 5.154476  |
| C | -5.898723 | -1.008345 | 0.201961  | C | 4.129323  | -2.871492 | -2.466152 | H | 7.827756  | 0.241546  | 2.622829  |
| C | -6.157187 | -1.796047 | -1.085002 | C | 4.168931  | -2.252302 | -3.865079 | H | 8.478864  | -1.847153 | 1.552903  |
| C | -6.328548 | -3.279827 | -0.784096 | C | 5.327177  | -1.270172 | -3.984929 | H | 8.786476  | -1.013790 | -0.646297 |
| C | -5.174373 | -3.796069 | 0.085410  | C | 5.312808  | -0.269296 | -2.821854 | H | 6.122306  | -1.437712 | -0.332281 |

|   |           |           |           |   |           |           |           |   |           |           |           |
|---|-----------|-----------|-----------|---|-----------|-----------|-----------|---|-----------|-----------|-----------|
| H | -3.827469 | -1.582630 | 0.290326  | H | 3.201609  | -1.144529 | -1.575565 | H | 6.919106  | -3.569314 | -1.003221 |
| H | -6.791468 | -1.044455 | 0.842164  | H | 5.021802  | -3.495082 | -2.314738 | H | 6.549604  | -3.512168 | 1.869004  |
| H | -5.271155 | -1.673900 | -1.727745 | H | 3.228398  | -1.696867 | -4.005791 | H | 4.630880  | -1.140878 | 1.707503  |
| H | -7.255456 | -3.404637 | -0.204842 | H | 6.265694  | -1.839849 | -3.915476 | H | 3.399769  | -2.578360 | 2.996568  |
| H | -5.397824 | -4.804050 | 0.452308  | H | 6.241236  | 0.312511  | -2.811060 | H | 4.436381  | -1.850392 | 4.228908  |
| C | -4.308728 | -0.943520 | 2.279032  | C | 4.067824  | -2.222279 | 0.064170  | H | 4.493605  | -4.446489 | 3.204280  |
| O | -7.328471 | -1.362519 | -1.751873 | O | 4.336017  | -3.227765 | -4.877878 | H | 5.804875  | -5.308926 | 1.182357  |
| O | -6.386987 | -4.056242 | -1.975687 | O | 5.282234  | -0.549374 | -5.211801 | H | 4.795080  | -6.654646 | -0.589027 |
| O | -3.998588 | -3.799711 | -0.683125 | O | 4.201252  | 0.575953  | -2.969771 | H | 5.625965  | -5.362230 | -2.423292 |
| H | -4.878644 | -0.026125 | 2.432929  | H | 3.940597  | -3.303945 | 0.127491  | H | 3.422585  | -4.087681 | -1.485149 |
| O | -2.936268 | -0.559600 | 2.313253  | O | 2.987518  | -1.662057 | 0.804390  | H | 2.445196  | -5.868222 | -2.888237 |
| H | -4.545734 | -1.640928 | 3.093042  | H | 5.034128  | -1.960585 | 0.515023  | H | 2.189646  | -6.634325 | -0.357235 |
| H | -7.271942 | -0.394968 | -1.861244 | H | 3.660425  | -3.918495 | -4.744945 | H | 2.458346  | -3.893258 | 0.962851  |
| H | -7.006798 | -3.598085 | -2.562749 | H | 5.117030  | -1.208045 | -5.902869 | H | 0.520221  | -5.000742 | 1.753652  |
| H | -2.374971 | -1.355450 | 2.178079  | H | 3.045604  | -0.681193 | 0.779662  | H | 1.776988  | -5.138306 | 3.013669  |
| O | -0.979865 | -5.746353 | 0.131159  | O | 3.809631  | 3.861573  | -1.353073 | H | 0.658181  | -7.172450 | 2.504507  |
| C | -1.815216 | -4.565990 | 0.163701  | C | 3.649070  | 2.426021  | -1.441447 | H | 0.087163  | -6.719581 | -0.623712 |
| C | -3.114405 | -4.914628 | -0.579199 | C | 4.363434  | 1.972102  | -2.724564 | H | -1.317405 | -6.528978 | -2.619142 |
| C | -2.794862 | -5.318388 | -2.020847 | C | 3.756138  | 2.674724  | -3.941197 | H | 0.399863  | -6.269695 | -4.226073 |
| C | -1.770403 | -6.446939 | -2.045201 | C | 3.780822  | 4.186082  | -3.750377 | H | 0.018388  | -3.834071 | -3.094991 |
| C | -0.557443 | -6.102652 | -1.171024 | C | 3.170556  | 4.570241  | -2.396800 | H | -1.552801 | -3.870285 | -4.840158 |
| H | -1.315021 | -3.751111 | -0.371626 | H | 2.583986  | 2.183233  | -1.525698 | H | -2.852739 | -4.482488 | -2.274520 |
| H | -3.615984 | -5.748279 | -0.067827 | H | 5.431660  | 2.221524  | -2.654558 | H | -0.579521 | -3.175901 | -0.708925 |
| H | -2.355809 | -4.440388 | -2.520249 | H | 2.706209  | 2.351922  | -4.020032 | H | -2.391594 | -2.179993 | 0.319834  |
| H | -2.241873 | -7.341504 | -1.611847 | H | 4.831840  | 4.510836  | -3.740838 | H | -2.361999 | -3.732802 | 1.164885  |
| H | 0.079595  | -6.984729 | -1.042437 | H | 3.350601  | 5.630222  | -2.185718 | H | -4.193617 | -2.720075 | -0.642760 |
| C | -1.957513 | -4.144266 | 1.636639  | C | 4.168935  | 1.822161  | -0.123214 | H | -4.042922 | -3.235782 | -3.405775 |
| O | -3.940329 | -5.775732 | -2.715872 | O | 4.464068  | 2.391024  | -5.134073 | H | -4.365081 | -1.445336 | -5.016849 |
| O | -1.319080 | -6.722763 | -3.366471 | O | 3.069959  | 4.860418  | -4.783038 | H | -2.314814 | -1.735942 | -6.227228 |
| O | 0.157267  | -5.061076 | -1.783268 | O | 1.792903  | 4.300852  | -2.436943 | H | -1.720107 | -0.304047 | -4.034785 |
| H | -3.007619 | -4.079577 | 1.926181  | H | 4.951155  | 1.085396  | -0.314797 | H | -2.447616 | 1.367629  | -5.575786 |
| O | -1.403990 | -2.855256 | 1.892827  | O | 3.156728  | 1.132016  | 0.604051  | H | -4.510410 | 0.881099  | -3.734766 |
| H | -1.473219 | -4.911228 | 2.254509  | H | 4.599031  | 2.637137  | 0.473012  | H | -2.660427 | -0.397591 | -1.652397 |
| H | -4.642201 | -5.105608 | -2.617131 | H | 4.541780  | 1.422181  | -5.218646 | H | -5.582048 | 0.335657  | -1.301802 |
| H | -2.114553 | -6.767311 | -3.917656 | H | 3.362423  | 4.458160  | -5.614546 | H | -4.248935 | 1.411788  | -0.821706 |
| H | -0.456647 | -2.841121 | 1.623188  | H | 2.420618  | 1.751757  | 0.804440  | H | -5.116055 | -0.442375 | 0.763377  |
| O | 3.648104  | -4.169481 | -1.032255 | O | -0.699803 | 5.725626  | -0.137304 | H | -4.346046 | 2.971754  | -3.622544 |
| C | 2.214131  | -4.039645 | -0.891002 | C | 0.221726  | 4.704679  | -0.587693 | H | -2.952691 | 4.865094  | -4.297693 |
| C | 1.583218  | -5.119866 | -1.782974 | C | 0.894822  | 5.245285  | -1.857513 | H | -1.600509 | 3.702595  | -5.876499 |
| C | 2.004767  | -4.896955 | -3.237975 | C | -0.166847 | 5.518266  | -2.926320 | H | -0.572873 | 3.179334  | -3.416648 |
| C | 3.523856  | -4.837699 | -3.353447 | C | -1.248857 | 6.444555  | -2.381739 | H | 0.367452  | 5.397725  | -3.961109 |
| C | 4.109026  | -3.853531 | -2.331940 | C | -1.774851 | 5.936477  | -1.032663 | H | -1.643210 | 5.784127  | -2.256199 |
| H | 1.900275  | -3.057021 | -1.259462 | H | -0.339559 | 3.801370  | -0.849938 | H | -1.748069 | 2.967803  | -1.073410 |
| H | 1.920339  | -6.111274 | -1.449552 | H | 1.426878  | 6.177233  | -1.620412 | H | -1.631790 | 4.572144  | 0.659704  |
| H | 1.595797  | -3.924424 | -3.553814 | H | -0.633199 | 4.553606  | -3.181202 | H | -3.329128 | 4.029915  | 0.535461  |
| H | 3.921879  | -5.834642 | -3.112711 | H | -0.792951 | 7.429998  | -2.204445 | H | -3.007570 | 6.396539  | 0.655565  |
| H | 5.199848  | -3.948830 | -2.291564 | H | -2.409571 | 6.694901  | -0.560807 | H | -0.303344 | 6.730529  | -0.942661 |
| C | 1.879404  | -4.092979 | 0.610253  | C | 1.147898  | 4.341549  | 0.587058  | H | 2.019534  | 7.447425  | -1.168033 |
| O | 1.558548  | -5.934071 | -4.092489 | O | 0.374912  | 6.137615  | -4.078458 | H | 2.376888  | 6.784141  | -3.411293 |
| O | 3.938910  | -4.445582 | -4.657207 | O | -2.343634 | 6.565347  | -3.283141 | H | 2.681673  | 4.563129  | -1.883260 |

|   |           |           |           |   |           |           |           |   |            |           |           |
|---|-----------|-----------|-----------|---|-----------|-----------|-----------|---|------------|-----------|-----------|
| H | 1.183886  | -4.906268 | 0.825235  | H | 2.193414  | 4.521804  | 0.331027  | H | 4.827460   | 5.535430  | -1.841635 |
| O | 1.241939  | -2.900200 | 1.057819  | O | 1.056863  | 2.960562  | 0.924852  | H | 3.369362   | 6.174508  | 0.622334  |
| H | 2.808710  | -4.277749 | 1.163146  | H | 0.887018  | 4.977092  | 1.442572  | H | 1.474282   | 3.814025  | 0.218955  |
| H | 0.595928  | -6.033506 | -3.970595 | H | 1.126306  | 5.597639  | -4.387637 | H | 2.119629   | 3.475598  | 2.412720  |
| H | 3.417675  | -4.979884 | -5.274894 | H | -1.953713 | 6.724164  | -4.155746 | H | 0.814339   | 4.651349  | 2.609140  |
| H | 1.874398  | -2.151473 | 0.993844  | H | 0.153088  | 2.781775  | 1.261484  | H | 3.501306   | 4.898286  | 3.124022  |
| C | 1.413328  | -3.931328 | 5.492370  | C | 1.225372  | 4.255513  | 5.225746  | C | -7.569788  | 3.331255  | 4.893300  |
| C | 2.535512  | -3.678962 | 6.279886  | C | 2.383546  | 4.146753  | 5.994043  | C | -8.707804  | 2.536371  | 4.767890  |
| C | 3.114736  | -2.412032 | 6.258956  | C | 3.069235  | 2.934526  | 6.029535  | C | -8.628139  | 1.335179  | 4.069068  |
| C | 2.600777  | -1.380336 | 5.460748  | C | 2.627953  | 1.817127  | 5.306538  | C | -7.433703  | 0.898267  | 3.474437  |
| C | 1.455542  | -1.632746 | 4.683046  | C | 1.447803  | 1.924861  | 4.547920  | C | -6.279835  | 1.688579  | 3.628030  |
| C | 0.878835  | -2.908675 | 4.710686  | C | 0.762968  | 3.146417  | 4.519286  | C | -6.371086  | 2.895026  | 4.335468  |
| C | 0.780311  | -0.517950 | 3.906135  | C | 0.853370  | 0.712995  | 3.854547  | C | -4.922578  | 1.218187  | 3.142351  |
| C | 0.342159  | 0.572584  | 4.854802  | C | 0.532043  | -0.352930 | 4.874931  | C | -4.582958  | -0.128659 | 3.736291  |
| C | -0.999334 | 0.809313  | 5.151906  | C | -0.776735 | -0.686733 | 5.220257  | C | -3.588218  | -0.264210 | 4.704906  |
| C | -1.370165 | 1.818954  | 6.044598  | C | -1.038328 | -1.671954 | 6.176646  | C | -3.288018  | -1.505192 | 5.268915  |
| C | -0.384908 | 2.595238  | 6.650187  | C | 0.023967  | -2.324002 | 6.798226  | C | -4.002653  | -2.627910 | 4.861525  |
| C | 0.963256  | 2.366726  | 6.366545  | C | 1.340576  | -1.996860 | 6.466741  | C | -5.009119  | -2.509927 | 3.900924  |
| C | 1.341830  | 1.358364  | 5.468799  | C | 1.609763  | -1.013352 | 5.504446  | C | -5.310944  | -1.266543 | 3.329828  |
| C | 3.402246  | -0.083031 | 5.433418  | C | 3.537564  | 0.593081  | 5.330472  | C | -7.544956  | -0.391307 | 2.659458  |
| N | 2.685793  | 1.154839  | 5.062621  | N | 2.921352  | -0.720079 | 5.050431  | N | -6.289734  | -1.107477 | 2.287346  |
| C | 4.595946  | -0.253472 | 4.467175  | C | 4.688366  | 0.808142  | 4.321900  | C | -8.326881  | -0.102309 | 1.360063  |
| C | 3.577767  | 2.309135  | 5.133474  | C | 3.910347  | -1.789371 | 5.155558  | C | -6.646372  | -2.364590 | 1.594525  |
| C | 4.748011  | 2.121409  | 4.172076  | C | 5.033104  | -1.558169 | 4.148241  | C | -7.458061  | -2.084234 | 0.335297  |
| N | 5.483008  | 0.906033  | 4.510299  | N | 5.671408  | -0.269710 | 4.398472  | N | -8.663808  | -1.331512 | 0.656237  |
| C | 6.654585  | 0.722865  | 3.670110  | C | 6.799784  | -0.036497 | 3.512416  | C | -9.486198  | -1.082911 | -0.517633 |
| H | 0.947159  | -4.912716 | 5.497370  | H | 0.675518  | 5.191954  | 5.189214  | H | -7.609086  | 4.271243  | 5.435734  |
| H | 2.955285  | -4.457724 | 6.910090  | H | 2.749041  | 4.994398  | 6.566540  | H | -9.648768  | 2.842897  | 5.214775  |
| H | 3.989174  | -2.213877 | 6.874900  | H | 3.971460  | 2.848250  | 6.631091  | H | -9.516553  | 0.714009  | 3.981543  |
| H | -0.005467 | -3.089128 | 4.106265  | H | -0.148052 | 3.214579  | 3.931386  | H | -5.473068  | 3.495479  | 4.456887  |
| H | -0.081159 | -0.919037 | 3.367751  | H | -0.051091 | 1.007752  | 3.318046  | H | -4.162763  | 1.949529  | 3.432926  |
| H | 1.477538  | -0.093612 | 3.172956  | H | 1.567363  | 0.305114  | 3.128153  | H | -4.894163  | 1.151274  | 2.049876  |
| H | -1.760391 | 0.214434  | 4.653655  | H | -1.597736 | -0.188483 | 4.711337  | H | -3.033999  | 0.618578  | 5.013450  |
| H | -2.419825 | 1.997694  | 6.259128  | H | -2.063415 | -1.928614 | 6.427448  | H | -2.504340  | -1.590288 | 6.015676  |
| H | -0.658753 | 3.380588  | 7.349489  | H | -0.164999 | -3.088608 | 7.546857  | H | -3.786334  | -3.602250 | 5.290069  |
| H | 1.721575  | 2.973804  | 6.849980  | H | 2.159557  | -2.507567 | 6.962535  | H | -5.553271  | -3.396727 | 3.600390  |
| H | 3.833672  | 0.050782  | 6.442648  | H | 4.002488  | 0.555751  | 6.333019  | H | -8.164451  | -1.087813 | 3.249883  |
| H | 4.199703  | -0.442895 | 3.450601  | H | 4.252853  | 0.907118  | 3.308874  | H | -7.724726  | 0.592950  | 0.739315  |
| H | 5.166854  | -1.137522 | 4.770253  | H | 5.190097  | 1.751692  | 4.561440  | H | -9.254947  | 0.417752  | 1.613910  |
| H | 3.975804  | 2.467837  | 6.152344  | H | 4.348678  | -1.855923 | 6.168060  | H | -7.241301  | -3.020480 | 2.250400  |
| H | 3.012743  | 3.199761  | 4.846359  | H | 3.416304  | -2.739287 | 4.935707  | H | -5.724854  | -2.883121 | 1.318630  |
| H | 5.427987  | 2.978230  | 4.254594  | H | 5.785043  | -2.350020 | 4.251847  | H | -7.744941  | -3.041154 | -0.115589 |
| H | 4.353002  | 2.091490  | 3.138947  | H | 4.606182  | -1.619097 | 3.128828  | H | -6.824280  | -1.557214 | -0.404096 |
| H | 6.411846  | 0.608413  | 2.595016  | H | 6.518655  | -0.001572 | 2.441351  | H | -8.978193  | -0.468798 | -1.286152 |
| H | 7.203076  | -0.170092 | 3.987794  | H | 7.279105  | 0.915216  | 3.764856  | H | -10.404863 | -0.564882 | -0.224282 |
| H | 7.321863  | 1.585306  | 3.773224  | H | 7.540465  | -0.833207 | 3.640044  | H | -9.765941  | -2.035458 | -0.978851 |

| Complexes 1:2 VACUUM                            |                |           |           |                                                 |                |           |          |                                               |                |           |           |  |
|-------------------------------------------------|----------------|-----------|-----------|-------------------------------------------------|----------------|-----------|----------|-----------------------------------------------|----------------|-----------|-----------|--|
| [ $\beta$ -CD-CCCW]-[MIA S]-[ $\beta$ -CD-CCCW] |                |           |           | [ $\beta$ -CD-CCCW]-[MIA R]-[ $\beta$ -CD-CCCW] |                |           |          | [ $\beta$ -CD-EXP]-[MIA S]-[ $\beta$ -CD-EXP] |                |           |           |  |
| CAPS A                                          |                |           |           | CAPS A                                          |                |           |          | CAPS A                                        |                |           |           |  |
| E                                               | -9358.41049921 |           |           | E                                               | -9358.39963617 |           |          | E                                             | -9358.33648282 |           |           |  |
| ZPE                                             | -9355.608033   |           |           |                                                 |                |           |          | ZPE                                           | -9355.540872   |           |           |  |
| H                                               | -9355.449270   |           |           |                                                 |                |           |          | H                                             | -9355.377594   |           |           |  |
| G                                               | -9355.788204   |           |           |                                                 |                |           |          | G                                             | -9355.735053   |           |           |  |
| S                                               | 713.347        |           |           |                                                 |                |           |          | S                                             | 752.335        |           |           |  |
| Atom                                            | x [Å]          | y [Å]     | z [Å]     | Atom                                            | x [Å]          | y [Å]     | z [Å]    | Atom                                          | x [Å]          | y [Å]     | z [Å]     |  |
| O                                               | 7.608925       | -1.699456 | 1.316817  | O                                               | -2.683142      | -4.004146 | 5.808110 | C                                             | 1.910512       | -3.667889 | 5.171787  |  |
| C                                               | 6.792751       | -0.795595 | 2.092189  | C                                               | -1.787092      | -4.418045 | 4.753195 | C                                             | 3.153674       | -2.903888 | 4.671509  |  |
| C                                               | 5.891598       | -1.584491 | 3.055600  | C                                               | -0.370554      | -4.049206 | 5.217430 | O                                             | 2.984415       | -1.527281 | 4.978961  |  |
| C                                               | 5.149245       | -2.710963 | 2.330955  | C                                               | -0.259470      | -2.532876 | 5.427429 | C                                             | 3.369514       | -3.128219 | 3.175848  |  |
| C                                               | 6.061178       | -3.544778 | 1.439947  | C                                               | -1.343663      | -2.051537 | 6.392153 | O                                             | 4.620085       | -2.560172 | 2.805927  |  |
| C                                               | 6.877185       | -2.607615 | 0.527388  | C                                               | -2.722642      | -2.605708 | 5.983063 | C                                             | 3.313990       | -4.616190 | 2.825959  |  |
| H                                               | 6.148630       | -0.227478 | 1.414128  | H                                               | -2.018942      | -3.861633 | 3.838383 | O                                             | 3.415317       | -4.722064 | 1.392007  |  |
| H                                               | 6.481428       | -2.001723 | 3.883850  | H                                               | -0.160182      | -4.560958 | 6.167060 | C                                             | 2.001248       | -5.216637 | 3.335978  |  |
| H                                               | 4.420870       | -2.235024 | 1.669820  | H                                               | -0.415852      | -2.046034 | 4.452462 | O                                             | 1.965654       | -5.018614 | 4.766620  |  |
| H                                               | 6.773892       | -4.105435 | 2.062052  | H                                               | -1.107379      | -2.463857 | 7.384897 | C                                             | 1.852727       | -6.720102 | 3.051137  |  |
| H                                               | 7.616344       | -3.184175 | -0.039961 | H                                               | -3.442990      | -2.427722 | 6.789132 | O                                             | 3.075952       | -7.438320 | 3.011586  |  |
| C                                               | 7.746100       | 0.172009  | 2.786487  | C                                               | -2.054087      | -5.907372 | 4.468981 | C                                             | 4.439177       | -5.499560 | 0.821137  |  |
| O                                               | 4.854206       | -0.729003 | 3.568880  | O                                               | 0.625390       | -4.381779 | 4.252869 | C                                             | 5.163690       | -4.678231 | -0.257481 |  |
| O                                               | 4.489825       | -3.562010 | 3.267613  | O                                               | 1.019506       | -2.198681 | 5.956479 | O                                             | 5.619198       | -3.510570 | 0.400762  |  |
| O                                               | 5.332726       | -4.434734 | 0.604449  | O                                               | -1.470591      | -0.643585 | 6.461210 | C                                             | 4.227492       | -4.369856 | -1.431355 |  |
| O                                               | 5.996404       | -1.933577 | -0.348908 | O                                               | -3.134612      | -1.954244 | 4.803570 | O                                             | 4.926732       | -3.913849 | -2.589056 |  |
| H                                               | 7.227579       | 0.649836  | 3.622538  | H                                               | -1.143053      | -6.496775 | 4.586886 | C                                             | 3.420241       | -5.587067 | -1.895262 |  |
| O                                               | 8.190306       | 1.213721  | 1.940399  | O                                               | -2.498736      | -6.134422 | 3.136614 | O                                             | 2.290788       | -5.073109 | -2.624271 |  |
| H                                               | 8.586455       | -0.414601 | 3.193384  | H                                               | -2.791882      | -6.261608 | 5.200799 | C                                             | 2.894448       | -6.472383 | -0.751159 |  |
| H                                               | 4.019786       | -2.985362 | 3.910584  | H                                               | 1.696569       | -2.716948 | 5.465983 | O                                             | 3.916214       | -6.692386 | 0.250966  |  |
| H                                               | 4.638825       | -4.901604 | 1.108681  | H                                               | -0.598602      | -0.203569 | 6.412160 | C                                             | 2.498936       | -7.863103 | -1.241073 |  |
| H                                               | 8.387965       | 0.842902  | 1.062214  | H                                               | -3.346318      | -5.658401 | 2.995923 | O                                             | 3.593919       | -8.553374 | -1.818311 |  |
| O                                               | 6.602389       | -0.605362 | -3.737559 | O                                               | -6.613246      | -1.724478 | 3.643895 | C                                             | 2.093900       | -5.430576 | -3.978977 |  |
| C                                               | 6.602435       | -0.588298 | -2.295891 | C                                               | -5.287405      | -2.299048 | 3.663317 | C                                             | 1.995891       | -4.150650 | -4.836872 |  |
| C                                               | 6.193794       | -1.973858 | -1.764061 | C                                               | -4.487713      | -1.509199 | 4.706287 | O                                             | 3.085573       | -3.273926 | -4.602509 |  |
| C                                               | 4.869407       | -2.444517 | -2.378162 | C                                               | -4.417564      | -0.023583 | 4.328125 | C                                             | 0.667222       | -3.424525 | -4.623665 |  |
| C                                               | 4.908978       | -2.324788 | -3.900450 | C                                               | -5.822985      | 0.539286  | 4.106576 | O                                             | 0.547714       | -2.409262 | -5.620921 |  |
| C                                               | 5.362296       | -0.920653 | -4.335326 | C                                               | -6.628041      | -0.390905 | 3.177787 | C                                             | -0.516470      | -4.383846 | -4.735225 |  |
| H                                               | 5.877743       | 0.152945  | -1.936822 | H                                               | -4.820102      | -2.170721 | 2.681290 | O                                             | -1.677309      | -3.640882 | -4.343222 |  |
| H                                               | 6.976220       | -2.703681 | -2.017185 | H                                               | -4.984791      | -1.604975 | 5.681869 | C                                             | -0.327039      | -5.618941 | -3.844495 |  |
| H                                               | 4.061719       | -1.805626 | -1.996533 | H                                               | -3.848275      | 0.068099  | 3.391620 | O                                             | 0.949613       | -6.236617 | -4.138197 |  |
| H                                               | 5.660074       | -3.034941 | -4.278383 | H                                               | -6.332087      | 0.553995  | 5.082236 | C                                             | -1.359281      | -6.709192 | -4.123289 |  |
| H                                               | 5.550373       | -0.912117 | -5.414371 | H                                               | -7.681638      | -0.089750 | 3.169237 | O                                             | -1.285450      | -7.166267 | -5.463435 |  |
| C                                               | 8.018635       | -0.141020 | -1.882471 | C                                               | -5.427270      | -3.812231 | 3.915307 | C                                             | -2.810070      | -3.621877 | -5.192887 |  |
| O                                               | 4.633174       | -3.807630 | -2.043218 | O                                               | -3.780656      | 0.704746  | 5.375850 | C                                             | -3.198033      | -2.155930 | -5.504667 |  |
| O                                               | 3.652868       | -2.569623 | -4.501478 | O                                               | -5.846538      | 1.828121  | 3.518987 | O                                             | -2.035565      | -1.481038 | -5.969160 |  |
| O                                               | 4.365627       | 0.025453  | -4.006960 | O                                               | -6.072883      | -0.295477 | 1.890570 | C                                             | -3.842214      | -1.470126 | -4.300279 |  |
| H                                               | 8.611430       | -0.988435 | -1.528676 | H                                               | -4.909900      | -4.105208 | 4.830733 | O                                             | -4.369396      | -0.215697 | -4.730594 |  |



|   |           |           |           |   |           |           |           |   |           |           |           |
|---|-----------|-----------|-----------|---|-----------|-----------|-----------|---|-----------|-----------|-----------|
| O | 8.026290  | 0.799627  | -0.817767 | O | -4.852327 | -4.588611 | 2.870199  | C | -4.950274 | -2.361124 | -3.731170 |
| H | 8.510335  | 0.264819  | -2.775303 | H | -6.495517 | -4.035408 | 4.035162  | O | -5.485759 | -1.687500 | -2.585072 |
| H | 4.774598  | -3.915490 | -1.075840 | H | -2.979144 | 0.202556  | 5.646733  | C | -4.372411 | -3.737604 | -3.379494 |
| H | 3.295961  | -3.446957 | -4.250655 | H | -5.099415 | 2.374939  | 3.833176  | O | -3.894047 | -4.312888 | -4.615462 |
| H | 7.652903  | 1.635559  | -1.128198 | H | -5.346042 | -4.400813 | 2.041942  | C | -5.358485 | -4.717331 | -2.728212 |
| O | 3.473732  | 3.272224  | -5.490368 | O | -7.628255 | -1.268308 | -1.282257 | O | -6.702740 | -4.632872 | -3.184737 |
| C | 4.022708  | 2.386616  | -4.490985 | C | -6.840434 | -1.493093 | -0.092804 | C | -6.859731 | -1.399408 | -2.550148 |
| C | 3.909736  | 0.943951  | -5.011760 | C | -6.928262 | -0.214816 | 0.751549  | C | -7.063027 | 0.028058  | -2.029237 |
| C | 2.435979  | 0.617344  | -5.308566 | C | -6.423290 | 1.004372  | -0.036367 | O | -6.330885 | 0.880681  | -2.898127 |
| C | 1.796328  | 1.671445  | -6.213404 | C | -7.069221 | 1.103563  | -1.417119 | C | -6.608241 | 0.110734  | -0.574907 |
| C | 2.094824  | 3.103323  | -5.724891 | C | -7.071888 | -0.273673 | -2.114053 | O | -6.901345 | 1.413427  | -0.083833 |
| H | 3.440858  | 2.468997  | -3.565333 | H | -5.795530 | -1.652571 | -0.378301 | C | -7.234142 | -0.979399 | 0.305117  |
| H | 4.506830  | 0.831131  | -5.927263 | H | -7.968727 | -0.047009 | 1.063593  | O | -6.485465 | -0.953263 | 1.529272  |
| H | 1.906364  | 0.624212  | -4.350587 | H | -5.345797 | 0.876243  | -0.172451 | C | -7.080517 | -2.363161 | -0.347854 |
| H | 2.250618  | 1.571834  | -7.211120 | H | -8.118356 | 1.407152  | -1.284568 | O | -7.556320 | -2.319167 | -1.717803 |
| H | 1.841882  | 3.815858  | -6.517861 | H | -7.707342 | -0.236682 | -3.005797 | C | -7.854957 | -3.482501 | 0.338933  |
| C | 5.446158  | 2.867681  | -4.202576 | C | -7.329680 | -2.792179 | 0.574774  | O | -7.436669 | -4.771027 | -0.079075 |
| O | 2.303604  | -0.651550 | -5.942352 | O | -6.676247 | 2.202845  | 0.697977  | C | -7.145048 | -0.833768 | 2.768231  |
| O | 0.387041  | 1.550388  | -6.301395 | O | -6.402100 | 1.996753  | -2.296677 | C | -6.569002 | 0.355300  | 3.557456  |
| O | 1.337581  | 3.379594  | -4.567239 | O | -5.745346 | -0.592945 | -2.466310 | O | -6.640122 | 1.517522  | 2.739840  |
| H | 6.074298  | 2.006360  | -3.960207 | H | -7.604976 | -2.611706 | 1.615457  | C | -5.148943 | 0.088484  | 4.059970  |
| O | 5.534749  | 3.744413  | -3.093008 | O | -6.325431 | -3.800778 | 0.604846  | O | -4.863504 | 1.107147  | 5.005931  |
| H | 5.841782  | 3.324019  | -5.122605 | H | -8.222381 | -3.135066 | 0.035098  | C | -4.996082 | -1.306164 | 4.678004  |
| H | 2.756931  | -1.318409 | -5.376256 | H | -6.341769 | 2.056872  | 1.610314  | O | -3.584846 | -1.587502 | 4.769865  |
| H | 0.105403  | 0.618468  | -6.386272 | H | -6.092406 | 2.803084  | -1.838651 | C | -5.667292 | -2.405508 | 3.842826  |
| H | 4.929016  | 4.501500  | -3.194588 | H | -6.081962 | -4.049752 | -0.314828 | O | -7.023466 | -2.023339 | 5.522960  |
| O | 0.268148  | 6.730254  | -3.460775 | O | -4.795892 | -3.025766 | -5.055015 | C | -5.794897 | -3.722808 | 4.604680  |
| C | 1.156932  | 5.593210  | -3.519621 | C | -5.078243 | -2.626285 | -3.695250 | O | -6.605010 | -3.581100 | 5.759854  |
| C | 0.565894  | 4.584622  | -4.515438 | C | -5.476999 | -1.144831 | -3.754938 | C | -2.994458 | -1.718931 | 6.047067  |
| C | -0.852745 | 4.172860  | -4.098942 | C | -4.321652 | -0.308734 | -4.320820 | C | -1.802710 | -0.743184 | 6.181813  |
| C | -1.729924 | 5.406854  | -3.876254 | C | -3.859356 | -0.859424 | -5.669353 | O | -2.220018 | 0.592505  | 5.955912  |
| C | -1.018294 | 6.425471  | -2.966728 | C | -3.660228 | -2.386210 | -5.594481 | C | -0.639380 | -1.188567 | 5.295254  |
| H | 1.212374  | 5.115284  | -2.536469 | H | -4.171327 | -2.725693 | -3.088797 | O | 0.475066  | -0.323615 | 5.509175  |
| H | 0.521352  | 5.043887  | -5.513179 | H | -6.358120 | -1.034033 | -4.402676 | C | -0.273244 | -2.638777 | 5.616431  |
| H | -0.786615 | 3.609731  | -3.157185 | H | -3.484868 | -0.365038 | -3.609662 | O | 0.746011  | -3.024018 | 4.686882  |
| H | -1.880331 | 5.889306  | -4.854035 | H | -4.662339 | -0.669676 | -6.397711 | C | -1.499577 | -3.558224 | 5.495509  |
| H | -1.569536 | 7.372456  | -2.968247 | H | -3.543107 | -2.791136 | -6.605743 | O | -2.584270 | -3.046623 | 6.299280  |
| C | 2.556467  | 6.125744  | -3.871920 | C | -6.125600 | -3.601594 | -3.130098 | C | -1.242282 | -4.959567 | 6.046349  |
| O | -1.441221 | 3.375902  | -5.122691 | O | -4.741531 | 1.043507  | -4.491764 | O | -0.904309 | -4.920623 | 7.423622  |
| O | -2.977779 | 5.118253  | -3.271963 | O | -2.636895 | -0.310661 | -6.126706 | H | 1.898692  | -3.693272 | 6.265771  |
| O | -0.951239 | 5.894489  | -1.666192 | O | -2.514507 | -2.651547 | -4.821494 | H | 4.023247  | -3.309665 | 5.208596  |
| H | 2.968025  | 5.590882  | -4.730109 | H | -6.991887 | -3.061066 | -2.744263 | H | 3.766973  | -1.022822 | 4.671739  |
| O | 3.505385  | 5.942214  | -2.872921 | O | -5.626488 | -4.367746 | -2.039698 | H | 2.547723  | -2.623112 | 2.650554  |
| H | 2.454379  | 7.185333  | -4.141801 | H | -6.460381 | -4.249267 | -3.951006 | H | 4.863896  | -2.885646 | 1.910615  |
| H | -0.779863 | 2.704580  | -5.404112 | H | -5.253533 | 1.308726  | -3.695660 | H | 4.146623  | -5.150277 | 3.296058  |
| H | -3.416734 | 4.350778  | -3.691215 | H | -2.589207 | 0.655826  | -5.980404 | H | 1.151161  | -4.689778 | 2.885300  |
| H | 3.197408  | 6.402487  | -2.024168 | H | -4.856980 | -4.901174 | -2.337045 | H | 1.295317  | -6.837055 | 2.113266  |
| O | -0.583466 | 7.583697  | 1.567755  | O | -0.566824 | -5.759898 | -5.025096 | H | 1.239909  | -7.144880 | 3.852931  |
| C | -0.127022 | 6.939750  | 0.358001  | C | -1.557942 | -4.888621 | -4.433033 | H | 3.362088  | -7.460455 | 2.085214  |
| C | -1.344326 | 6.687825  | -0.542556 | C | -1.579438 | -3.618566 | -5.293753 | H | 5.151244  | -5.824997 | 1.585739  |

|   |           |           |           |   |           |           |           |   |           |           |           |
|---|-----------|-----------|-----------|---|-----------|-----------|-----------|---|-----------|-----------|-----------|
| C | -2.406177 | 5.860037  | 0.195752  | C | -0.208258 | -2.930795 | -5.259568 | H | 6.007986  | -5.279534 | -0.624224 |
| C | -2.721475 | 6.424435  | 1.580014  | C | 0.889792  | -3.910393 | -5.675005 | H | 6.101991  | -2.869287 | -0.166352 |
| C | -1.421528 | 6.751519  | 2.341684  | C | 0.744346  | -5.248225 | -4.919657 | H | 3.516701  | -3.614313 | -1.088489 |
| H | 0.303214  | 5.970626  | 0.618712  | H | -1.250711 | -4.625549 | -3.415330 | H | 5.356097  | -2.037536 | -2.463303 |
| H | -1.775997 | 7.641890  | -0.876224 | H | -1.816810 | -3.896114 | -6.330480 | H | 4.050466  | -6.200074 | -2.549977 |
| H | -1.982168 | 4.860504  | 0.324586  | H | -0.018289 | -2.602364 | -4.226953 | H | 2.036560  | -5.979881 | -0.283995 |
| H | -3.276131 | 7.366249  | 1.455608  | H | 0.755626  | -4.122692 | -6.746365 | H | 1.738091  | -7.764806 | -2.020323 |
| H | -1.650780 | 7.316491  | 3.251756  | H | 1.397015  | -6.003590 | -5.371763 | H | 2.062434  | -8.425718 | -0.401933 |
| C | 0.994034  | 7.790477  | -0.266464 | C | -2.878984 | -5.672469 | -4.327708 | H | 4.277662  | -8.604843 | -1.135295 |
| O | -3.610785 | 5.785928  | -0.564528 | O | -0.196900 | -1.820343 | -6.151542 | H | 2.932184  | -6.045566 | -4.324334 |
| O | -3.454740 | 5.521001  | 2.395626  | O | 2.201694  | -3.431693 | -5.428398 | H | 2.027407  | -4.468271 | -5.888313 |
| O | -0.783101 | 5.535438  | 2.666156  | O | 1.093111  | -5.030881 | -3.575735 | H | 3.673191  | -3.601857 | -3.884702 |
| H | 0.772241  | 8.003864  | -1.314215 | H | -3.671577 | -5.182145 | -4.896003 | H | 0.660589  | -2.981471 | -3.617296 |
| O | 2.256014  | 7.127352  | -0.270520 | O | -3.351740 | -5.757348 | -2.987378 | H | -0.397575 | -2.125815 | -5.658079 |
| H | 1.043807  | 8.743347  | 0.277289  | H | -2.713485 | -6.670181 | -4.754839 | H | -0.613643 | -4.720635 | -5.774576 |
| H | -3.364352 | 5.483892  | -1.467435 | H | -1.029133 | -1.314325 | -6.013962 | H | -0.369189 | -5.318699 | -2.790377 |
| H | -4.208371 | 5.128938  | 1.913250  | H | 2.276909  | -2.482612 | -5.650960 | H | -2.363583 | -6.303456 | -3.980588 |
| H | 2.531645  | 6.963456  | 0.655603  | H | -2.696515 | -6.257745 | -2.454718 | H | -1.208756 | -7.530818 | -3.406971 |
| O | 1.752636  | 4.898694  | 5.256774  | O | 2.087643  | -7.504066 | -1.053389 | H | -0.376953 | -7.474926 | -5.592036 |
| C | 1.281320  | 5.259781  | 3.941575  | C | 1.141840  | -6.673759 | -1.766552 | H | -2.589045 | -4.151971 | -6.124874 |
| C | -0.251024 | 5.319828  | 3.976824  | C | 1.915018  | -5.976915 | -2.893484 | H | -3.951574 | -2.189446 | -6.305147 |
| C | -0.835319 | 3.981626  | 4.444265  | C | 3.054223  | -5.142487 | -2.300844 | H | -2.156724 | -0.513447 | -5.929191 |
| C | -0.201496 | 3.545697  | 5.763769  | C | 3.950238  | -5.961490 | -1.376236 | H | -3.084245 | -1.317722 | -3.519184 |
| C | 1.337552  | 3.621410  | 5.678340  | C | 3.083223  | -6.762255 | -0.381235 | H | -4.934891 | 0.137150  | -4.010547 |
| H | 1.585935  | 4.482196  | 3.236838  | H | 0.749767  | -5.905819 | -1.091441 | H | -5.737231 | -2.504105 | -4.481482 |
| H | -0.582763 | 6.117545  | 4.656257  | H | 2.310228  | -6.722894 | -3.597078 | H | -3.522125 | -3.618617 | -2.695075 |
| H | -0.599160 | 3.222198  | 3.684999  | H | 2.571417  | -4.361880 | -1.705188 | H | -5.313348 | -4.590056 | -1.640272 |
| H | -0.517207 | 4.256653  | 6.542335  | H | 4.509646  | -6.685716 | -1.987014 | H | -5.008846 | -5.728703 | -2.955820 |
| H | 1.763424  | 3.488753  | 6.678995  | H | 3.698815  | -7.497520 | 0.148430  | H | -7.103987 | -3.859481 | -2.751550 |
| C | 1.970771  | 6.574832  | 3.537983  | C | -0.047790 | -7.550526 | -2.199406 | H | -7.306853 | -1.507285 | -3.544118 |
| O | -2.245822 | 4.101389  | 4.610574  | O | 3.842415  | -4.557445 | -3.333478 | H | -8.137764 | 0.255572  | -2.084603 |
| O | -0.534020 | 2.223039  | 6.141522  | O | 4.841563  | -5.167860 | -0.607588 | H | -6.270394 | 1.787284  | -2.546962 |
| O | 1.798595  | 2.599005  | 4.815853  | O | 2.512418  | -5.851326 | 0.529558  | H | -5.531054 | -0.079058 | -0.559718 |
| H | 1.237479  | 7.305352  | 3.190503  | H | -0.198626 | -7.488227 | -3.279126 | H | -6.750631 | 1.415677  | 0.889868  |
| O | 2.895315  | 6.411378  | 2.466050  | O | -1.273567 | -7.134890 | -1.607604 | H | -8.292275 | -0.752289 | 0.496850  |
| H | 2.467113  | 6.980167  | 4.430117  | H | 0.186694  | -8.592248 | -1.942755 | H | -6.015194 | -2.617697 | -0.344650 |
| H | -2.604425 | 4.534671  | 3.804651  | H | 3.226331  | -4.154135 | -3.986433 | H | -8.931787 | -3.324574 | 0.171461  |
| H | -1.482182 | 2.026160  | 5.994920  | H | 5.221087  | -4.440881 | -1.138660 | H | -7.667460 | -3.429082 | 1.414689  |
| H | 3.503211  | 5.682535  | 2.715880  | H | -1.198732 | -7.219235 | -0.631670 | H | -7.657406 | -4.889778 | -1.014967 |
| O | 5.149090  | 1.088831  | 4.990238  | O | 1.137558  | -6.613488 | 3.843655  | H | -8.220844 | -0.692500 | 2.613932  |
| C | 4.138848  | 1.907842  | 4.361923  | C | 1.061780  | -6.426044 | 2.413181  | H | -7.207246 | 0.489391  | 4.442711  |
| C | 2.889231  | 1.782938  | 5.244206  | C | 2.489486  | -6.146512 | 1.926377  | H | -5.856560 | 2.079298  | 2.904612  |
| C | 2.405721  | 0.325480  | 5.211356  | C | 3.056289  | -4.895694 | 2.617734  | H | -4.461190 | 0.144072  | 3.204560  |
| C | 3.536161  | -0.638816 | 5.594639  | C | 2.938385  | -4.992110 | 4.136962  | H | -3.988494 | 0.923765  | 5.402341  |
| C | 4.880628  | -0.295322 | 4.909215  | C | 1.515487  | -5.439944 | 4.529695  | H | -5.447229 | -1.310850 | 5.677029  |
| H | 3.927670  | 1.506795  | 3.363535  | H | 0.441773  | -5.550438 | 2.193146  | H | -5.101567 | -2.559763 | 2.915556  |
| H | 3.172751  | 2.047968  | 6.272197  | H | 3.132817  | -7.010768 | 2.143065  | H | -4.806175 | -4.038660 | 4.947088  |
| H | 2.075956  | 0.104758  | 4.184663  | H | 2.456395  | -4.036755 | 2.295214  | H | -6.191293 | -4.490789 | 3.924089  |
| H | 3.693939  | -0.518099 | 6.677159  | H | 3.637091  | -5.766253 | 4.487654  | H | -7.453174 | -3.232312 | 5.449828  |
| H | 5.698621  | -0.786359 | 5.447409  | H | 1.487327  | -5.694067 | 5.594886  | H | -3.733561 | -1.495985 | 6.823411  |

|   |           |           |          |   |           |           |           |   |           |           |           |
|---|-----------|-----------|----------|---|-----------|-----------|-----------|---|-----------|-----------|-----------|
| C | 4.721793  | 3.315666  | 4.175685 | C | 0.355316  | -7.651396 | 1.804231  | H | -1.468851 | -0.797104 | 7.226074  |
| O | 1.335824  | 0.130955  | 6.128599 | O | 4.421556  | -4.708110 | 2.257808  | H | -1.982331 | 0.909213  | 5.056572  |
| O | 3.243754  | -1.991527 | 5.287808 | O | 3.183745  | -3.766666 | 4.808489  | H | -0.950928 | -1.142776 | 4.243137  |
| H | 4.598660  | 3.917917  | 5.081075 | H | 0.972782  | -8.109431 | 1.029259  | H | 1.284626  | -0.758189 | 5.158771  |
| O | 4.077464  | 4.008514  | 3.120146 | O | -0.874561 | -7.313766 | 1.173490  | H | 0.109554  | -2.698701 | 6.642491  |
| H | 5.798238  | 3.199773  | 3.987191 | H | 0.204033  | -8.387109 | 2.605264  | H | -1.800637 | -3.617022 | 4.441583  |
| H | 0.689914  | 0.865722  | 6.010956 | H | 4.489400  | -4.809921 | 1.282875  | H | -0.396629 | -5.411750 | 5.523667  |
| H | 2.341637  | -2.240623 | 5.574090 | H | 3.859200  | -3.227607 | 4.350802  | H | -2.135933 | -5.575642 | 5.867375  |
| H | 4.132706  | 3.482976  | 2.270564 | H | -1.490189 | -6.934400 | 1.838969  | H | -1.641751 | -4.473998 | 7.864370  |
| O | -3.171505 | -4.075817 | 5.585061 | O | 7.400257  | 0.830358  | 2.140476  | C | 7.469102  | 1.450315  | 1.957565  |
| C | -2.541908 | -4.547340 | 4.373030 | C | 6.245209  | 1.578771  | 2.577993  | C | 6.799226  | 0.563703  | 3.024162  |
| C | -1.044525 | -4.675992 | 4.687397 | C | 5.455258  | 0.739586  | 3.598187  | O | 6.661225  | -0.738892 | 2.478432  |
| C | -0.466094 | -3.305809 | 5.069812 | C | 5.102027  | -0.639928 | 3.015848  | C | 5.463579  | 1.163846  | 3.456033  |
| C | -1.265475 | -2.689358 | 6.218180 | C | 6.341499  | -1.326837 | 2.436272  | O | 4.963848  | 0.417352  | 4.567570  |
| C | -2.779294 | -2.767001 | 5.935445 | C | 7.102768  | -0.384057 | 1.488862  | C | 5.579291  | 2.649797  | 3.825497  |
| H | -2.675243 | -3.804513 | 3.578999 | H | 5.593287  | 1.781760  | 1.722315  | O | 4.214919  | 3.109097  | 3.844581  |
| H | -0.910777 | -5.373425 | 5.526377 | H | 6.055206  | 0.597438  | 4.507858  | C | 6.409854  | 3.446320  | 2.797057  |
| H | -0.542674 | -2.650375 | 4.189694 | H | 4.372473  | -0.491486 | 2.207302  | O | 7.625212  | 2.757143  | 2.460532  |
| H | -1.069486 | -3.294451 | 7.116451 | H | 7.014500  | -1.566146 | 3.273222  | C | 6.916131  | 4.813310  | 3.290981  |
| H | -3.335478 | -2.524368 | 6.847709 | H | 8.069917  | -0.824992 | 1.221822  | O | 5.977270  | 5.582321  | 4.016623  |
| C | -3.269802 | -5.830248 | 3.933353 | C | 6.775701  | 2.906360  | 3.117236  | C | 3.758010  | 3.948310  | 4.883537  |
| O | -0.284892 | -5.112564 | 3.562305 | O | 4.209853  | 1.383154  | 3.931615  | C | 2.730738  | 3.221891  | 5.752938  |
| O | 0.893579  | -3.444683 | 5.475397 | O | 4.567241  | -1.488959 | 4.025470  | O | 3.314823  | 2.013416  | 6.237078  |
| O | -0.966768 | -1.328028 | 6.466342 | O | 6.034760  | -2.499867 | 1.701517  | C | 1.422718  | 2.934438  | 5.011361  |
| O | -3.089566 | -1.852852 | 4.911217 | O | 6.321758  | -0.170278 | 0.340608  | O | 0.494951  | 2.406720  | 5.942670  |
| H | -2.569985 | -6.662259 | 3.836239 | H | 6.046478  | 3.329282  | 3.814617  | C | 0.887164  | 4.222700  | 4.379186  |
| O | -3.893236 | -5.693532 | 2.661167 | O | 6.981838  | 3.886689  | 2.118848  | O | -0.261788 | 3.927284  | 3.565220  |
| H | -4.002816 | -6.084425 | 4.710185 | H | 7.698511  | 2.691347  | 3.680610  | C | 1.979477  | 4.872944  | 3.511946  |
| H | 1.341637  | -4.032369 | 4.828230 | H | 3.899735  | -0.978868 | 4.536404  | O | 3.157946  | 5.102460  | 4.321645  |
| H | -0.010553 | -1.138643 | 6.379451 | H | 5.458947  | -3.104070 | 2.210389  | C | 1.616531  | 6.248515  | 2.963590  |
| H | -4.567944 | -4.981121 | 2.705682 | H | 7.378513  | 3.491905  | 1.322571  | O | 1.275690  | 7.170443  | 3.981114  |
| O | -6.426775 | -0.452143 | 4.287705 | O | 7.075180  | 0.823319  | -3.104309 | C | -1.522852 | 4.204674  | 4.176376  |
| C | -5.342476 | -1.378401 | 4.047659 | C | 6.870369  | 0.992429  | -1.685189 | C | -2.553112 | 3.196977  | 3.623486  |
| C | -4.242505 | -1.026269 | 5.056537 | C | 6.863836  | -0.366023 | -0.972349 | O | -1.968407 | 1.886658  | 3.579432  |
| C | -3.758185 | 0.414044  | 4.843989 | C | 5.925421  | -1.362305 | -1.656843 | C | -3.106829 | 3.575245  | 2.246351  |
| C | -4.936386 | 1.387900  | 4.886380 | C | 6.107044  | -1.389964 | -3.169893 | O | -4.344283 | 2.900359  | 2.060961  |
| C | -6.084352 | 0.884283  | 3.989633 | C | 6.089252  | 0.043777  | -3.732716 | C | -3.291089 | 5.080750  | 2.014465  |
| H | -4.956727 | -1.233694 | 3.033045 | H | 5.894673  | 1.457966  | -1.529918 | O | -3.328122 | 5.225733  | 0.588027  |
| H | -4.648389 | -1.121440 | 6.073598 | H | 7.877367  | -0.786773 | -0.912899 | C | -2.127796 | 5.894428  | 2.583732  |
| H | -3.286565 | 0.471531  | 3.851867 | H | 4.913551  | -1.010629 | -1.449497 | O | -1.928489 | 5.532672  | 3.964615  |
| H | -5.310279 | 1.412463  | 5.921042 | H | 7.090674  | -1.820404 | -3.408692 | C | -2.370847 | 7.399780  | 2.578192  |
| H | -6.989563 | 1.473154  | 4.176024 | H | 6.351032  | 0.028890  | -4.796352 | O | -3.543438 | 7.748633  | 3.298457  |
| C | -5.909867 | -2.807694 | 4.128548 | C | 7.957353  | 1.952823  | -1.174676 | C | -4.318587 | 5.990910  | -0.070383 |
| O | -2.829373 | 0.765917  | 5.865044 | O | 6.103549  | -2.676003 | -1.130146 | C | -5.229876 | 5.047639  | -0.881931 |
| O | -4.615084 | 2.696153  | 4.445825 | O | 5.078567  | -2.113061 | -3.830327 | O | -5.806173 | 4.115365  | 0.030101  |
| O | -5.672304 | 1.016459  | 2.652285 | O | 4.787738  | 0.583574  | -3.563006 | C | -4.404775 | 4.356812  | -1.962692 |
| H | -5.411109 | -3.381607 | 4.911826 | H | 8.475241  | 1.524011  | -0.312587 | O | -5.281146 | 3.577697  | -2.779875 |
| O | -5.715098 | -3.536536 | 2.921409 | O | 7.445716  | 3.201575  | -0.730323 | C | -3.590422 | 5.350579  | -2.793598 |
| H | -6.975931 | -2.732832 | 4.380270 | H | 8.692193  | 2.084977  | -1.981303 | O | -2.677403 | 4.547175  | -3.565213 |
| H | -2.188109 | 0.025170  | 5.958379 | H | 6.006471  | -2.605500 | -0.153926 | C | -2.793289 | 6.293127  | -1.881358 |

|   |           |           |           |   |           |           |           |   |           |           |           |
|---|-----------|-----------|-----------|---|-----------|-----------|-----------|---|-----------|-----------|-----------|
| H | -3.736179 | 2.976062  | 4.771639  | H | 4.946497  | -2.995333 | -3.431717 | O | -3.702358 | 6.912833  | -0.944468 |
| H | -6.206678 | -3.081613 | 2.203571  | H | 6.803661  | 3.521490  | -1.393748 | C | -2.017588 | 7.405535  | -2.623238 |
| O | -7.788052 | 1.084704  | -0.340272 | O | 3.263948  | 3.306349  | -5.514089 | O | -2.473134 | 7.699126  | -3.938376 |
| C | -6.979468 | 0.444414  | 0.622168  | C | 3.802715  | 2.734742  | -4.303286 | C | -2.657662 | 4.636053  | -4.960451 |
| C | -6.579183 | 1.530010  | 1.679334  | C | 4.173021  | 1.282508  | -4.646936 | C | -2.616645 | 3.219884  | -5.549937 |
| C | -5.807402 | 2.654690  | 0.976065  | C | 2.886672  | 0.523030  | -5.016438 | O | -3.760634 | 2.536159  | -5.060923 |
| C | -6.560888 | 3.192217  | -0.238062 | C | 2.141494  | 1.241937  | -6.145929 | C | -1.300361 | 2.532894  | -5.183604 |
| C | -7.060651 | 2.019510  | -1.108509 | C | 2.015733  | 2.761399  | -5.888068 | O | -1.259043 | 1.281486  | -5.854312 |
| H | -6.067962 | 0.047263  | 0.213679  | H | 3.025119  | 2.745240  | -3.529266 | C | -0.088560 | 3.407097  | -5.551706 |
| H | -7.476009 | 1.938221  | 2.166258  | H | 4.849602  | 1.297361  | -5.512480 | O | 1.085989  | 2.800887  | -4.983584 |
| H | -4.869643 | 2.216247  | 0.621824  | H | 2.236169  | 0.500390  | -4.129018 | C | -0.249899 | 4.826499  | -4.983831 |
| H | -7.445766 | 3.740145  | 0.118823  | H | 2.751290  | 1.125485  | -7.055062 | O | -1.523467 | 5.373398  | -5.408562 |
| H | -7.755512 | 2.388659  | -1.870712 | H | 1.742328  | 3.267051  | -6.820594 | C | 0.810441  | 5.815882  | -5.450335 |
| C | -7.762619 | -0.756940 | 1.234376  | C | 4.933378  | 3.658338  | -3.832731 | O | 0.764084  | 7.034838  | -4.725533 |
| O | -5.537379 | 3.720882  | 1.883008  | O | 3.185961  | -0.798772 | -5.451605 | C | 2.065523  | 2.287887  | -5.861234 |
| O | -5.770502 | 4.019121  | -1.077985 | O | 0.835896  | 0.739040  | -6.364166 | C | 2.359655  | 0.794069  | -5.573184 |
| O | -5.940799 | 1.414952  | -1.712684 | O | 1.036592  | 2.999969  | -4.901561 | O | 1.128712  | 0.146218  | -5.295460 |
| H | -7.864485 | -0.678277 | 2.318425  | H | 5.876380  | 3.414981  | -4.331493 | C | 3.366809  | 0.543094  | -4.442755 |
| O | -7.105280 | -1.996191 | 0.992326  | O | 5.166818  | 3.546507  | -2.437606 | O | 3.947455  | -0.750100 | -4.574476 |
| H | -8.767020 | -0.744888 | 0.790565  | H | 4.652130  | 4.682887  | -4.109740 | C | 4.542322  | 1.514079  | -4.477514 |
| H | -5.187481 | 3.324498  | 2.712365  | H | 3.791932  | -1.209965 | -4.794945 | O | 5.278151  | 1.336886  | -3.260196 |
| H | -5.196182 | 4.617665  | -0.561590 | H | 0.815931  | -0.238757 | -6.324257 | C | 4.049678  | 2.958353  | -4.618710 |
| H | -7.036912 | -2.142215 | 0.022847  | H | 4.349111  | 3.769012  | -1.930826 | O | 3.250817  | 3.053965  | -5.820178 |
| O | -6.000179 | -0.720644 | -4.700220 | O | -1.034274 | 6.020296  | -4.442614 | C | 5.188577  | 3.954979  | -4.820571 |
| C | -6.024011 | -0.477920 | -3.276350 | C | 0.115577  | 5.170505  | -4.220961 | O | 5.932694  | 3.665153  | -5.991831 |
| C | -5.991411 | 1.045131  | -3.089984 | C | -0.006573 | 3.953188  | -5.150951 | C | 6.636843  | 0.939718  | -3.305498 |
| C | -4.720278 | 1.637937  | -3.715922 | C | -1.321845 | 3.207070  | -4.878651 | C | 6.821557  | -0.363748 | -2.497043 |
| C | -4.572464 | 1.201578  | -5.172922 | C | -2.526536 | 4.151964  | -4.885165 | O | 6.029847  | -1.423768 | -3.007063 |
| C | -4.793256 | -0.317884 | -5.306838 | C | -2.255516 | 5.430525  | -4.065671 | C | 6.520104  | -0.097881 | -1.024797 |
| H | -5.127359 | -0.909049 | -2.817859 | H | 0.100314  | 4.814129  | -3.188333 | O | 6.862222  | -1.253804 | -0.264174 |
| H | -6.874428 | 1.490776  | -3.569034 | H | 0.019123  | 4.278428  | -6.200212 | C | 7.286420  | 1.113197  | -0.488104 |
| H | -3.858108 | 1.261178  | -3.149420 | H | -1.235243 | 2.751317  | -3.882941 | O | 6.692656  | 1.441915  | 0.780395  |
| H | -5.364309 | 1.699860  | -5.752565 | H | -2.692269 | 4.465408  | -5.926885 | C | 7.196433  | 2.333625  | -1.417098 |
| H | -4.888224 | -0.583141 | -6.365446 | H | -3.029019 | 6.175622  | -4.282947 | O | 7.469342  | 1.953633  | -2.780714 |
| C | -7.242004 | -1.216677 | -2.693763 | C | 1.375232  | 6.028349  | -4.391454 | C | 8.243265  | 3.395470  | -1.085242 |
| O | -4.770592 | 3.060598  | -3.653797 | O | -1.532100 | 2.199762  | -5.863984 | O | 9.560072  | 2.897323  | -1.247112 |
| O | -3.302184 | 1.478165  | -5.735106 | O | -3.702671 | 3.566872  | -4.351879 | H | 8.482246  | 1.091150  | 1.749466  |
| O | -3.690601 | -0.982563 | -4.731758 | O | -2.267186 | 5.105602  | -2.692325 | H | 7.468397  | 0.539768  | 3.896308  |
| H | -7.873523 | -0.533381 | -2.123022 | H | 2.159583  | 5.434470  | -4.867127 | H | 5.963850  | -1.244824 | 2.940768  |
| O | -6.872261 | -2.252299 | -1.790746 | O | 1.919287  | 6.473173  | -3.162467 | H | 4.769181  | 1.092697  | 2.610211  |
| H | -7.830119 | -1.611068 | -3.532967 | H | 1.126158  | 6.862700  | -5.065519 | H | 4.346946  | 0.989509  | 5.074492  |
| H | -5.035691 | 3.309041  | -2.740509 | H | -0.697357 | 1.684298  | -5.947357 | H | 6.026713  | 2.738614  | 4.823654  |
| H | -2.932218 | 2.324620  | -5.410398 | H | -3.848815 | 2.658405  | -4.685118 | H | 5.788813  | 3.564275  | 1.898800  |
| H | -6.320264 | -2.915234 | -2.260474 | H | 1.253136  | 6.975159  | -2.656681 | H | 7.319450  | 5.363396  | 2.428296  |
| O | -2.697240 | -4.420106 | -5.560427 | O | -2.945171 | 7.256106  | 0.209766  | H | 7.750133  | 4.627006  | 3.974320  |
| C | -3.357763 | -3.421580 | -4.749400 | C | -2.133728 | 6.653358  | -0.820197 | H | 5.150775  | 5.667694  | 3.519109  |
| C | -3.106695 | -2.074020 | -5.438620 | C | -3.052333 | 5.873457  | -1.772986 | H | 4.596762  | 4.314921  | 5.477091  |
| C | -1.602093 | -1.779855 | -5.498446 | C | -3.914253 | 4.856607  | -1.006173 | H | 2.494761  | 3.880226  | 6.601129  |
| C | -0.853512 | -2.937098 | -6.159901 | C | -4.610458 | 5.490037  | 0.197283  | H | 2.606244  | 1.539854  | 6.701509  |
| C | -1.293321 | -4.287839 | -5.560428 | C | -3.593577 | 6.298858  | 1.021825  | H | 1.627884  | 2.213261  | 4.207224  |

|   |           |           |           |   |           |           |           |   |           |           |           |
|---|-----------|-----------|-----------|---|-----------|-----------|-----------|---|-----------|-----------|-----------|
| H | -2.904541 | -3.403808 | -3.752438 | H | -1.447563 | 5.939415  | -0.358306 | H | 0.353672  | 1.453872  | 5.763906  |
| H | -3.505855 | -2.116982 | -6.461714 | H | -3.706907 | 6.567457  | -2.318866 | H | 0.604655  | 4.937354  | 5.159605  |
| H | -1.240586 | -1.673879 | -4.423967 | H | -3.245386 | 4.075059  | -0.627218 | H | 2.228811  | 4.206756  | 2.675521  |
| H | -1.131054 | -2.944486 | -7.224578 | H | -5.378055 | 6.189334  | -0.165708 | H | 0.749839  | 6.160474  | 2.307210  |
| H | -0.916952 | -5.108639 | -6.181138 | H | -4.106460 | 6.863991  | 1.807628  | H | 2.461754  | 6.608667  | 2.356744  |
| C | -4.828783 | -3.844407 | -4.578939 | C | -1.282169 | 7.759306  | -1.465256 | H | 2.041872  | 7.231006  | 4.569395  |
| O | -1.358264 | -0.592249 | -6.241479 | O | -4.898160 | 4.294171  | -1.871565 | H | -1.432149 | 4.083718  | 5.257833  |
| O | 0.554807  | -2.860515 | -6.015620 | O | -5.182010 | 4.538013  | 1.080116  | H | -3.390416 | 3.136646  | 4.323007  |
| O | -0.774410 | -4.378746 | -4.255013 | O | -2.665855 | 5.396365  | 1.579261  | H | -1.059942 | 2.027805  | 3.265237  |
| H | -5.503058 | -3.081945 | -4.973258 | H | -1.385321 | 7.739303  | -2.552445 | H | -2.379904 | 3.234355  | 1.494058  |
| O | -5.186969 | -4.016486 | -3.212480 | O | 0.110247  | 7.601451  | -1.219701 | H | -4.769700 | 3.276131  | 1.258490  |
| H | -4.981084 | -4.769535 | -5.150183 | H | -1.649206 | 8.728428  | -1.101490 | H | -4.227723 | 5.420409  | 2.469512  |
| H | -2.006644 | 0.089543  | -5.953062 | H | -4.443003 | 4.011206  | -2.696150 | H | -1.226619 | 5.666954  | 2.001965  |
| H | 0.883027  | -1.954200 | -6.178034 | H | -5.721929 | 3.875169  | 0.605670  | H | -2.516377 | 7.738213  | 1.548249  |
| H | -4.649287 | -4.746024 | -2.834729 | H | 0.294201  | 7.614613  | -0.260259 | H | -1.479420 | 7.895146  | 2.988017  |
| O | -0.306140 | -7.451857 | -2.302537 | O | -0.492280 | 5.890584  | 4.504338  | H | -3.406852 | 7.439142  | 4.205241  |
| C | -1.031588 | -6.271195 | -2.715024 | C | -0.827817 | 5.916565  | 3.099631  | H | -4.899785 | 6.580132  | 0.645938  |
| C | -0.198821 | -5.610315 | -3.819880 | C | -2.296829 | 5.497385  | 2.953743  | H | -6.018368 | 5.652932  | -1.349711 |
| C | 1.192378  | -5.237036 | -3.295226 | C | -2.520487 | 4.103347  | 3.549064  | H | -6.284214 | 3.411647  | -0.443502 |
| C | 1.887260  | -6.430320 | -2.641014 | C | -2.009433 | 4.048024  | 4.987183  | H | -3.681122 | 3.707393  | -1.460169 |
| C | 0.920867  | -7.149070 | -1.674153 | C | -0.578124 | 4.612309  | 5.089704  | H | -4.757485 | 3.215671  | -3.524427 |
| H | -1.110821 | -5.578079 | -1.871087 | H | -0.206023 | 5.192014  | 2.561872  | H | -4.238015 | 5.935071  | -3.456284 |
| H | -0.099021 | -6.304123 | -4.666287 | H | -2.943050 | 6.221217  | 3.470157  | H | -2.075644 | 5.691338  | -1.313301 |
| H | 1.052312  | -4.457782 | -2.536769 | H | -1.954120 | 3.381192  | 2.942892  | H | -0.952739 | 7.144344  | -2.643887 |
| H | 2.149733  | -7.144561 | -3.435687 | H | -2.655774 | 4.697988  | 5.596689  | H | -2.126157 | 8.320231  | -2.033780 |
| H | 1.346522  | -8.110856 | -1.367349 | H | -0.318594 | 4.751622  | 6.145021  | H | -2.121242 | 7.006277  | -4.522186 |
| C | -2.462186 | -6.692862 | -3.099066 | C | -0.503464 | 7.321429  | 2.569596  | H | -3.529335 | 5.182252  | -5.336408 |
| O | 1.999867  | -4.744642 | -4.362852 | O | -3.908916 | 3.790591  | 3.536357  | H | -2.667977 | 3.310870  | -6.644924 |
| O | 3.040469  | -6.080737 | -1.892442 | O | -1.978773 | 2.740539  | 5.525372  | H | -3.696857 | 1.573447  | -5.218928 |
| O | 0.723798  | -6.316841 | -0.557051 | O | 0.322957  | 3.708432  | 4.483312  | H | -1.272148 | 2.397937  | -4.096071 |
| H | -2.685839 | -6.409473 | -4.129419 | H | -1.336022 | 7.709009  | 1.979448  | H | -0.391080 | 0.860214  | -5.644379 |
| O | -3.448396 | -6.058933 | -2.292671 | O | 0.623410  | 7.338778  | 1.697519  | H | 0.003288  | 3.453028  | -6.646050 |
| H | -2.524664 | -7.786251 | -3.020088 | H | -0.351908 | 7.984300  | 3.431786  | H | -0.225749 | 4.772922  | -3.889739 |
| H | 1.458529  | -4.098292 | -4.869930 | H | -4.250109 | 3.974526  | 2.632576  | H | 0.697302  | 5.980102  | -6.532785 |
| H | 3.509562  | -5.319580 | -2.288261 | H | -2.816126 | 2.259180  | 5.355718  | H | 1.797380  | 5.380604  | -5.277325 |
| H | -3.321905 | -6.342443 | -1.360314 | H | 1.393253  | 7.003520  | 2.193295  | H | -0.045181 | 7.505783  | -4.968549 |
| O | -0.505138 | -7.286560 | 2.762892  | O | 3.909367  | 3.312765  | 5.220758  | H | 1.710004  | 2.379870  | -6.893526 |
| C | -0.654130 | -6.826104 | 1.400875  | C | 2.764742  | 3.843153  | 4.519013  | H | 2.813353  | 0.392289  | -6.490661 |
| C | 0.740395  | -6.867756 | 0.760647  | C | 1.494718  | 3.310754  | 5.196526  | H | 1.156997  | -0.829564 | -5.459935 |
| C | 1.698786  | -5.968425 | 1.551187  | C | 1.493691  | 1.782195  | 5.239715  | H | 2.856844  | 0.653245  | -3.475156 |
| C | 1.711713  | -6.313523 | 3.036556  | C | 2.775331  | 1.264265  | 5.884521  | H | 3.310102  | -1.496687 | -4.561288 |
| C | 0.263787  | -6.408502 | 3.559391  | C | 4.022981  | 1.900565  | 5.231577  | H | 5.179761  | 1.287739  | -5.339929 |
| H | -0.998996 | -5.786635 | 1.404156  | H | 2.780227  | 3.511986  | 3.474202  | H | 3.450182  | 3.242505  | -3.743652 |
| H | 1.115939  | -7.900260 | 0.738207  | H | 1.455981  | 3.691550  | 6.227308  | H | 5.883128  | 3.885698  | -3.979958 |
| H | 1.308248  | -4.948474 | 1.460876  | H | 1.450380  | 1.407251  | 4.209588  | H | 4.771266  | 4.972487  | -4.846179 |
| H | 2.181083  | -7.299740 | 3.166312  | H | 2.771020  | 1.575669  | 6.940088  | H | 5.297045  | 3.671545  | -6.721891 |
| H | 0.254710  | -6.834698 | 4.568609  | H | 4.902736  | 1.691305  | 5.849381  | H | 6.959745  | 0.797119  | -4.341678 |
| C | -1.749540 | -7.668451 | 0.721924  | C | 2.876430  | 5.383716  | 4.553041  | H | 7.872710  | -0.663191 | -2.593136 |
| O | 3.022823  | -6.050100 | 1.033897  | O | 0.381572  | 1.317963  | 5.994163  | H | 5.247483  | -1.067819 | -3.494708 |
| O | 2.377047  | -5.339247 | 3.827374  | O | 2.906622  | -0.143502 | 5.793694  | H | 5.446977  | 0.115475  | -0.949621 |

|               |                |           |           |               |                |           |           |   |           |           |           |
|---------------|----------------|-----------|-----------|---------------|----------------|-----------|-----------|---|-----------|-----------|-----------|
| H             | -1.373332      | -8.124726 | -0.195867 | H             | 2.070400       | 5.817876  | 5.146854  | H | 6.772209  | -1.032669 | 0.691309  |
| O             | -2.876121      | -6.888866 | 0.336430  | O             | 2.757520       | 5.995997  | 3.265345  | H | 8.342193  | 0.847913  | -0.356011 |
| H             | -2.038020      | -8.471161 | 1.413469  | H             | 3.832427       | 5.642934  | 5.022067  | H | 6.189703  | 2.763280  | -1.347706 |
| H             | 2.968963       | -6.001891 | 0.053920  | H             | -0.420605      | 1.806144  | 5.695866  | H | 8.140826  | 3.691829  | -0.037667 |
| H             | 3.200043       | -5.033570 | 3.400036  | H             | 2.064752       | -0.595273 | 6.006074  | H | 8.064911  | 4.278913  | -1.716281 |
| H             | -3.283217      | -6.483835 | 1.134430  | H             | 3.585381       | 5.866830  | 2.782989  | H | 9.615543  | 2.583707  | -2.161524 |
| C             | 1.510909       | -2.869385 | -0.250763 | C             | 2.046354       | -2.464490 | 0.151974  | C | -3.518294 | 1.238458  | -0.876086 |
| C             | 2.032565       | -2.428983 | 0.961917  | C             | 2.612186       | -1.858490 | -0.965287 | C | -2.733641 | 1.235373  | -2.024114 |
| C             | 2.265866       | -1.069624 | 1.156626  | C             | 2.558189       | -0.475332 | -1.098787 | C | -1.463673 | 0.668848  | -1.977441 |
| C             | 1.976770       | -0.126172 | 0.168323  | C             | 1.933942       | 0.323876  | -0.141184 | C | -0.975018 | 0.100064  | -0.799098 |
| C             | 1.393293       | -0.567959 | -1.037776 | C             | 1.333226       | -0.289329 | 0.973970  | C | -1.806022 | 0.020897  | 0.333967  |
| C             | 1.183698       | -1.935916 | -1.231450 | C             | 1.410418       | -1.678380 | 1.112083  | C | -3.069812 | 0.606387  | 0.280160  |
| C             | 0.779873       | 0.416106  | -2.013942 | C             | 0.373382       | 0.509425  | 1.829944  | C | -1.398683 | -0.790844 | 1.548488  |
| C             | -0.295547      | 1.135891  | -1.244187 | C             | -0.753033      | 0.862167  | 0.889612  | C | -1.123702 | -2.208977 | 1.111616  |
| C             | -1.645498      | 0.807355  | -1.338461 | C             | -1.911843      | 0.094092  | 0.809663  | C | -1.980860 | -3.268419 | 1.407730  |
| C             | -2.578758      | 1.388088  | -0.478459 | C             | -2.854629      | 0.325975  | -0.191586 | C | -1.718034 | -4.559946 | 0.941936  |
| C             | -2.154263      | 2.301803  | 0.484776  | C             | -2.657344      | 1.368894  | -1.095034 | C | -0.589680 | -4.784232 | 0.154379  |
| C             | -0.803521      | 2.645580  | 0.582151  | C             | -1.496893      | 2.145415  | -1.027506 | C | 0.274884  | -3.731068 | -0.160561 |
| C             | 0.133065       | 2.064011  | -0.275441 | C             | -0.516734      | 1.875841  | -0.065308 | C | 0.022801  | -2.440709 | 0.319957  |
| C             | 2.336532       | 1.321074  | 0.483687  | C             | 1.931937       | 1.816394  | -0.409766 | C | 0.494547  | -0.242548 | -0.774084 |
| N             | 1.531995       | 2.332899  | -0.223381 | N             | 0.724675       | 2.564951  | 0.009106  | N | 0.893518  | -1.345676 | 0.105520  |
| C             | 3.828598       | 1.577041  | 0.186957  | C             | 3.157313       | 2.515228  | 0.199832  | C | 1.255750  | 1.028077  | -0.343725 |
| C             | 1.922615       | 3.681668  | 0.173810  | C             | 0.797378       | 3.894101  | -0.587670 | C | 2.328145  | -1.559587 | 0.010408  |
| C             | 3.396075       | 3.919601  | -0.126873 | C             | 2.023128       | 4.647097  | -0.083848 | C | 3.044043  | -0.317529 | 0.537958  |
| N             | 4.231634       | 2.934607  | 0.582195  | N             | 3.272925       | 3.895495  | -0.296042 | N | 2.699430  | 0.834891  | -0.294719 |
| C             | 5.660500       | 3.182090  | 0.324492  | C             | 4.387283       | 4.587179  | 0.353531  | C | 3.352677  | 2.059884  | 0.143381  |
| H             | 1.332203       | -3.923516 | -0.425420 | H             | 2.072708       | -3.541758 | 0.259227  | H | -4.488378 | 1.714296  | -0.881035 |
| H             | 2.266592       | -3.126611 | 1.758101  | H             | 3.090463       | -2.441888 | -1.741603 | H | -3.101006 | 1.678995  | -2.939138 |
| H             | 2.694638       | -0.736565 | 2.096959  | H             | 3.008248       | -0.006321 | -1.967399 | H | -0.827530 | 0.673363  | -2.859142 |
| H             | 0.727422       | -2.264545 | -2.161756 | H             | 0.927792       | -2.151940 | 1.963770  | H | -3.709077 | 0.582358  | 1.154127  |
| H             | 0.360844       | -0.117039 | -2.871809 | H             | 0.015232       | -0.085548 | 2.674935  | H | -2.194632 | -0.761353 | 2.295199  |
| H             | 1.513199       | 1.144612  | -2.368075 | H             | 0.829325       | 1.427842  | 2.209305  | H | -0.487300 | -0.381272 | 2.002655  |
| H             | -1.966973      | 0.080208  | -2.080281 | H             | -2.061426      | -0.714057 | 1.521486  | H | -2.856583 | -3.078650 | 2.022724  |
| H             | -3.625333      | 1.122434  | -0.572762 | H             | -3.724441      | -0.315408 | -0.261549 | H | -2.391427 | -5.376226 | 1.185487  |
| H             | -2.863279      | 2.757848  | 1.168546  | H             | -3.395544      | 1.580079  | -1.862136 | H | -0.385788 | -5.779546 | -0.231850 |
| H             | -0.487598      | 3.363822  | 1.329719  | H             | -1.356791      | 2.951176  | -1.736876 | H | 1.127387  | -3.908745 | -0.804373 |
| H             | 2.200230       | 1.456732  | 1.573670  | H             | 2.028617       | 1.925068  | -1.505057 | H | 0.808125  | -0.476897 | -1.808714 |
| H             | 4.007548       | 1.407698  | -0.888921 | H             | 3.075265       | 2.477933  | 1.300239  | H | 0.856053  | 1.345799  | 0.640955  |
| H             | 4.429302       | 0.855898  | 0.746553  | H             | 4.063145       | 1.970610  | -0.082197 | H | 1.033081  | 1.828295  | -1.057528 |
| H             | 1.747929       | 3.868689  | 1.245572  | H             | 0.842162       | 3.838128  | -1.686825 | H | 2.650131  | -1.724997 | -1.033921 |
| H             | 1.323211       | 4.396583  | -0.391186 | H             | -0.095551      | 4.456652  | -0.313295 | H | 2.605438  | -2.434359 | 0.595194  |
| H             | 3.673574       | 4.919188  | 0.215835  | H             | 2.096690       | 5.592998  | -0.626759 | H | 4.125362  | -0.472905 | 0.512962  |
| H             | 3.575474       | 3.876004  | -1.209165 | H             | 1.889652       | 4.866609  | 0.986932  | H | 2.754223  | -0.166617 | 1.596215  |
| H             | 5.885546       | 3.163201  | -0.752781 | H             | 4.250058       | 4.655979  | 1.445295  | H | 3.014048  | 2.388998  | 1.145397  |
| H             | 6.275476       | 2.452336  | 0.858744  | H             | 5.320279       | 4.049861  | 0.197314  | H | 3.135874  | 2.865573  | -0.566543 |
| H             | 5.916107       | 4.176388  | 0.703648  | H             | 4.483837       | 5.596420  | -0.057290 | H | 4.432793  | 1.916374  | 0.189356  |
| <b>CAPS B</b> |                |           |           | <b>CAPS B</b> |                |           |           |   |           |           |           |
| E             | -9358.38780141 |           |           | E             | -9358.39131373 |           |           |   |           |           |           |
| O             | 4.976482       | -5.511075 | -2.563585 | O             | 2.536932       | -7.429975 | -0.488201 |   |           |           |           |
| C             | 4.730640       | -5.046486 | -1.215761 | C             | 1.684427       | -6.673317 | -1.376901 |   |           |           |           |

|   |          |           |           |   |           |           |           |
|---|----------|-----------|-----------|---|-----------|-----------|-----------|
| C | 3.617427 | -5.926153 | -0.631480 | C | 2.594682  | -5.986769 | -2.404322 |
| C | 2.364008 | -5.810936 | -1.504855 | C | 3.599436  | -5.083319 | -1.680956 |
| C | 2.642866 | -6.086919 | -2.977130 | C | 4.368208  | -5.826987 | -0.594465 |
| C | 3.883269 | -5.285238 | -3.429976 | C | 3.379998  | -6.608648 | 0.294265  |
| H | 4.364484 | -4.015048 | -1.248786 | H | 1.167029  | -5.893898 | -0.807735 |
| H | 3.951667 | -6.970503 | -0.557458 | H | 3.115523  | -6.737178 | -3.015355 |
| H | 2.052889 | -4.766561 | -1.418693 | H | 2.999719  | -4.309602 | -1.191769 |
| H | 2.870040 | -7.155388 | -3.104343 | H | 5.041321  | -6.554702 | -1.070860 |
| H | 4.211413 | -5.622093 | -4.419690 | H | 3.924477  | -7.286780 | 0.960636  |
| C | 6.066017 | -5.030748 | -0.449449 | C | 0.607456  | -7.617537 | -1.940879 |
| O | 3.202832 | -5.438242 | 0.644207  | O | 1.840954  | -5.100919 | -3.232530 |
| O | 1.328095 | -6.676973 | -1.046692 | O | 4.524091  | -4.498818 | -2.594615 |
| O | 1.562164 | -5.709721 | -3.823724 | O | 5.102246  | -4.961148 | 0.261148  |
| O | 3.533581 | -3.921871 | -3.461173 | O | 2.634159  | -5.674257 | 1.036104  |
| H | 5.989236 | -5.618684 | 0.467495  | H | 0.613141  | -7.599123 | -3.032801 |
| O | 6.446552 | -3.720691 | -0.042243 | O | -0.708200 | -7.238547 | -1.550491 |
| H | 6.832366 | -5.487873 | -1.089666 | H | 0.842864  | -8.638353 | -1.611653 |
| H | 1.263432 | -6.574941 | -0.071884 | H | 4.015199  | -4.151244 | -3.359511 |
| H | 0.702820 | -5.912830 | -3.407492 | H | 5.539999  | -4.247018 | -0.241052 |
| H | 6.579157 | -3.156705 | -0.836195 | H | -0.781364 | -7.275661 | -0.571223 |
| O | 5.297430 | -1.294559 | -5.330796 | O | 0.824005  | -6.388553 | 4.149552  |
| C | 5.019704 | -2.086905 | -4.154654 | C | 0.932906  | -6.239096 | 2.716160  |
| C | 3.943688 | -3.106488 | -4.557087 | C | 2.400528  | -5.898604 | 2.424279  |
| C | 2.674910 | -2.370010 | -5.008547 | C | 2.791564  | -4.588098 | 3.122801  |
| C | 2.988670 | -1.364768 | -6.115480 | C | 2.470398  | -4.650063 | 4.615807  |
| C | 4.206046 | -0.498308 | -5.735080 | C | 1.043278  | -5.183044 | 4.847026  |
| H | 4.615095 | -1.442410 | -3.366424 | H | 0.304425  | -5.404539 | 2.386922  |
| H | 4.320740 | -3.733493 | -5.377463 | H | 3.042696  | -6.711940 | 2.790877  |
| H | 2.290034 | -1.822556 | -4.136087 | H | 2.204001  | -3.778047 | 2.665981  |
| H | 3.261046 | -1.935882 | -7.015896 | H | 3.167047  | -5.367876 | 5.074490  |
| H | 4.552398 | 0.054753  | -6.615039 | H | 0.907707  | -5.423198 | 5.907360  |
| C | 6.355416 | -2.656705 | -3.646187 | C | 0.381820  | -7.519527 | 2.063652  |
| O | 1.702991 | -3.295692 | -5.487256 | O | 4.186760  | -4.347178 | 2.965500  |
| O | 1.925215 | -0.473844 | -6.398812 | O | 2.546110  | -3.397548 | 5.273617  |
| O | 3.820664 | 0.393696  | -4.714948 | O | 0.128563  | -4.190236 | 4.446166  |
| H | 6.300348 | -3.742253 | -3.544662 | H | 1.119861  | -7.961696 | 1.391892  |
| O | 6.705802 | -2.162855 | -2.358495 | O | -0.772016 | -7.272955 | 1.267874  |
| H | 7.128465 | -2.418046 | -4.388566 | H | 0.167123  | -8.240405 | 2.863582  |
| H | 1.675934 | -4.060310 | -4.871781 | H | 4.416067  | -4.496971 | 2.022345  |
| H | 1.053249 | -0.917924 | -6.376827 | H | 3.342025  | -2.890863 | 5.015534  |
| H | 6.790249 | -1.184971 | -2.390736 | H | -1.484178 | -6.909489 | 1.838242  |
| O | 5.510524 | 3.553584  | -3.912705 | O | -3.339419 | -3.980947 | 5.634403  |
| C | 5.226405 | 2.148511  | -3.728881 | C | -2.314726 | -4.355063 | 4.685370  |
| C | 4.216197 | 1.761032  | -4.815584 | C | -0.981283 | -3.899925 | 5.291619  |
| C | 2.930536 | 2.586667  | -4.676898 | C | -0.974221 | -2.377611 | 5.486833  |
| C | 3.248550 | 4.082163  | -4.661077 | C | -2.181694 | -1.940868 | 6.316944  |
| C | 4.392106 | 4.379700  | -3.671994 | C | -3.473815 | -2.582718 | 5.772358  |
| H | 4.771375 | 1.994222  | -2.744767 | H | -2.478894 | -3.822435 | 3.742660  |
| H | 4.661166 | 1.953281  | -5.801992 | H | -0.849052 | -4.387364 | 6.267915  |
| H | 2.460594 | 2.318654  | -3.719733 | H | -1.038864 | -1.908716 | 4.493650  |

|   |          |          |           |   |           |           |           |
|---|----------|----------|-----------|---|-----------|-----------|-----------|
| H | 3.603580 | 4.356224 | -5.666164 | H | -2.033061 | -2.317720 | 7.340135  |
| H | 4.745521 | 5.407230 | -3.812306 | H | -4.292572 | -2.430566 | 6.484522  |
| C | 6.564060 | 1.385606 | -3.745384 | C | -2.459042 | -5.860784 | 4.394927  |
| O | 2.053126 | 2.308486 | -5.762731 | O | 0.218661  | -1.977920 | 6.155026  |
| O | 2.154718 | 4.899038 | -4.283562 | O | -2.390850 | -0.539180 | 6.333797  |
| O | 3.898059 | 4.203189 | -2.365403 | O | -3.772063 | -1.978756 | 4.537937  |
| H | 6.578951 | 0.642577 | -4.545108 | H | -1.549232 | -6.400456 | 4.663821  |
| O | 6.793125 | 0.667870 | -2.538174 | O | -2.680066 | -6.126308 | 3.014178  |
| H | 7.364213 | 2.113305 | -3.934435 | H | -3.283366 | -6.244241 | 5.010529  |
| H | 2.012836 | 1.331816 | -5.878053 | H | 0.972145  | -2.453965 | 5.738012  |
| H | 1.314684 | 4.562944 | -4.654625 | H | -1.542286 | -0.054459 | 6.367388  |
| H | 6.842420 | 1.313410 | -1.800446 | H | -3.529047 | -5.710338 | 2.748978  |
| O | 5.357268 | 5.596353 | 0.699232  | O | -7.017917 | -1.949169 | 2.824850  |
| C | 5.156457 | 4.569088 | -0.298267 | C | -5.695777 | -2.462738 | 3.105835  |
| C | 4.223543 | 5.162879 | -1.360636 | C | -5.118521 | -1.611843 | 4.245128  |
| C | 2.882117 | 5.573750 | -0.738504 | C | -5.048817 | -0.138870 | 3.823849  |
| C | 3.083098 | 6.464127 | 0.491000  | C | -6.402572 | 0.358840  | 3.318994  |
| C | 4.181455 | 5.896332 | 1.419785  | C | -7.000112 | -0.638468 | 2.303308  |
| H | 4.663497 | 3.706233 | 0.161929  | H | -5.061376 | -2.337458 | 2.221932  |
| H | 4.701071 | 6.042433 | -1.814600 | H | -5.747587 | -1.716262 | 5.140252  |
| H | 2.370992 | 4.655132 | -0.428369 | H | -4.326591 | -0.083973 | 3.001508  |
| H | 3.437937 | 7.443406 | 0.135261  | H | -7.089329 | 0.401648  | 4.177656  |
| H | 4.468089 | 6.652214 | 2.159587  | H | -8.045969 | -0.382472 | 2.100335  |
| C | 6.537587 | 4.095626 | -0.792185 | C | -5.814151 | -3.974778 | 3.373857  |
| O | 2.085306 | 6.268492 | -1.696595 | O | -4.621606 | 0.676117  | 4.912669  |
| O | 1.914266 | 6.617542 | 1.280307  | O | -6.340383 | 1.621308  | 2.673279  |
| O | 3.673898 | 4.749980 | 2.060758  | O | -6.239226 | -0.572086 | 1.119263  |
| H | 6.636515 | 4.243449 | -1.869091 | H | -5.410459 | -4.226074 | 4.356555  |
| O | 6.747119 | 2.706693 | -0.563777 | O | -5.077762 | -4.752098 | 2.436325  |
| H | 7.301786 | 4.702064 | -0.288301 | H | -6.880095 | -4.238137 | 3.360476  |
| H | 2.096519 | 5.738294 | -2.524178 | H | -3.835798 | 0.242774  | 5.314534  |
| H | 1.117297 | 6.700375 | 0.720565  | H | -5.740313 | 2.228260  | 3.147151  |
| H | 6.757518 | 2.547863 | 0.406210  | H | -5.444832 | -4.604141 | 1.536977  |
| O | 4.972081 | 3.121939 | 5.087282  | O | -7.242109 | -1.721069 | -2.220607 |
| C | 4.876879 | 3.334338 | 3.661036  | C | -6.629094 | -1.875326 | -0.921361 |
| C | 3.926672 | 4.522250 | 3.448705  | C | -6.892400 | -0.574802 | -0.151030 |
| C | 2.552495 | 4.203282 | 4.058826  | C | -6.304196 | 0.626318  | -0.907136 |
| C | 2.660887 | 3.767541 | 5.517549  | C | -6.774883 | 0.669923  | -2.358905 |
| C | 3.757199 | 2.690235 | 5.662759  | C | -6.624090 | -0.723578 | -3.004284 |
| H | 4.432713 | 2.450931 | 3.189793  | H | -5.547261 | -1.997247 | -1.040344 |
| H | 4.344500 | 5.426489 | 3.913089  | H | -7.974700 | -0.433277 | -0.022772 |
| H | 2.142734 | 3.355824 | 3.498868  | H | -5.213021 | 0.510675  | -0.919108 |
| H | 2.966057 | 4.635531 | 6.120507  | H | -7.845651 | 0.922915  | -2.365687 |
| H | 3.973396 | 2.518544 | 6.723002  | H | -7.137252 | -0.742005 | -3.971960 |
| C | 6.304624 | 3.480936 | 3.105295  | C | -7.169760 | -3.170828 | -0.289866 |
| O | 1.685855 | 5.332332 | 3.959545  | O | -6.666991 | 1.837214  | -0.249461 |
| O | 1.460436 | 3.208761 | 6.031073  | O | -6.046259 | 1.578243  | -3.167950 |
| O | 3.299707 | 1.506081 | 5.053156  | O | -5.250152 | -0.989671 | -3.169437 |
| H | 6.401872 | 4.404126 | 2.530890  | H | -7.594794 | -2.971917 | 0.695837  |
| O | 6.655255 | 2.428613 | 2.213694  | O | -6.151765 | -4.144115 | -0.086992 |



|   |           |           |          |   |           |           |           |
|---|-----------|-----------|----------|---|-----------|-----------|-----------|
| H | 6.996401  | 3.529104  | 3.956654 | H | -7.967214 | -3.556547 | -0.938622 |
| H | 1.767461  | 5.689211  | 3.048558 | H | -6.494618 | 1.718255  | 0.710214  |
| H | 0.669929  | 3.649263  | 5.663992 | H | -5.797615 | 2.388940  | -2.678559 |
| H | 6.622386  | 1.564118  | 2.680541 | H | -5.761092 | -4.397987 | -0.952131 |
| O | 4.588463  | -1.863444 | 5.761414 | O | -3.863053 | -3.414142 | -5.555833 |
| C | 4.528550  | -0.629845 | 5.012080 | C | -4.337518 | -3.005270 | -4.253454 |
| C | 3.493851  | 0.258142  | 5.717927 | C | -4.792239 | -1.547300 | -4.400515 |
| C | 2.120148  | -0.426600 | 5.718890 | C | -3.614377 | -0.664724 | -4.832997 |
| C | 2.215146  | -1.829792 | 6.318610 | C | -2.943070 | -1.217063 | -6.089886 |
| C | 3.392405  | -2.607888 | 5.699985 | C | -2.694198 | -2.732837 | -5.954329 |
| H | 4.183779  | -0.837151 | 3.993107 | H | -3.512661 | -3.050670 | -3.534172 |
| H | 3.813234  | 0.429303  | 6.755580 | H | -5.585758 | -1.491304 | -5.158741 |
| H | 1.784938  | -0.509898 | 4.674336 | H | -2.879765 | -0.667816 | -4.014485 |
| H | 2.424430  | -1.715528 | 7.393007 | H | -3.640787 | -1.071882 | -6.928240 |
| H | 3.577686  | -3.517019 | 6.282565 | H | -2.424758 | -3.149984 | -6.930809 |
| C | 5.959371  | -0.072820 | 4.915200 | C | -5.403943 | -4.016990 | -3.796598 |
| O | 1.195682  | 0.341002  | 6.484481 | O | -4.067578 | 0.658964  | -5.095971 |
| O | 1.060003  | -2.623850 | 6.122178 | O | -1.689886 | -0.623231 | -6.381125 |
| O | 3.062222  | -2.932723 | 4.370942 | O | -1.651821 | -2.931263 | -5.029193 |
| H | 6.004255  | 0.951231  | 5.290680 | H | -6.343428 | -3.513102 | -3.562233 |
| O | 6.433149  | -0.018084 | 3.574515 | O | -5.024532 | -4.707988 | -2.611822 |
| H | 6.607873  | -0.699108 | 5.541794 | H | -5.583210 | -4.715010 | -4.624867 |
| H | 1.296172  | 1.283855  | 6.224057 | H | -4.673560 | 0.924055  | -4.367576 |
| H | 0.232377  | -2.117983 | 6.248909 | H | -1.687002 | 0.341831  | -6.220389 |
| H | 6.439940  | -0.924492 | 3.196985 | H | -4.206648 | -5.221646 | -2.790555 |
| O | 4.569740  | -5.710072 | 2.501198 | O | 0.450239  | -5.940019 | -4.891346 |
| C | 4.440142  | -4.319303 | 2.876983 | C | -0.656928 | -5.111691 | -4.467958 |
| C | 3.307501  | -4.259605 | 3.909390 | C | -0.616393 | -3.857778 | -5.351563 |
| C | 1.992573  | -4.743334 | 3.283772 | C | 0.700025  | -3.103870 | -5.126450 |
| C | 2.170128  | -6.135047 | 2.674401 | C | 1.896661  | -4.026580 | -5.358904 |
| C | 3.441582  | -6.194109 | 1.802222 | C | 1.706387  | -5.360752 | -4.605661 |
| H | 4.154994  | -3.730120 | 1.999164 | H | -0.510357 | -4.814687 | -3.424111 |
| H | 3.563928  | -4.910770 | 4.756985 | H | -0.693171 | -4.157554 | -6.406114 |
| H | 1.718349  | -4.040026 | 2.483452 | H | 0.706546  | -2.770745 | -4.078957 |
| H | 2.305675  | -6.845813 | 3.503407 | H | 1.938175  | -4.255529 | -6.434193 |
| H | 3.672336  | -7.234771 | 1.547334 | H | 2.453897  | -6.089423 | -4.939042 |
| C | 5.819395  | -3.813888 | 3.340894 | C | -1.943083 | -5.957198 | -4.524902 |
| O | 0.969701  | -4.802784 | 4.273650 | O | 0.797678  | -1.989272 | -6.006582 |
| O | 1.083764  | -6.533048 | 1.853451 | O | 3.130426  | -3.476258 | -4.924874 |
| H | 5.788770  | -3.488883 | 4.382495 | H | -2.665622 | -5.526180 | -5.220468 |
| O | 6.260860  | -2.687738 | 2.589604 | O | -2.601023 | -6.022224 | -3.263920 |
| H | 6.528225  | -4.648313 | 3.259528 | H | -1.672180 | -6.958636 | -4.884217 |
| H | 1.014256  | -3.976364 | 4.804889 | H | -0.073884 | -1.533208 | -6.020220 |
| H | 0.229564  | -6.344188 | 2.289436 | H | 3.193279  | -2.522201 | -5.132848 |
| H | 6.383749  | -2.972664 | 1.658138 | H | -2.007498 | -6.473566 | -2.624510 |
| O | -5.181676 | -4.409626 | 3.567893 | O | 4.033775  | 3.293900  | -5.119922 |
| C | -4.972712 | -4.284077 | 2.143970 | C | 4.444290  | 2.803142  | -3.825303 |
| C | -3.913567 | -5.309229 | 1.715397 | C | 4.848603  | 1.332165  | -4.015646 |
| C | -2.624289 | -5.093062 | 2.518383 | C | 3.627538  | 0.538504  | -4.497774 |
| C | -2.880043 | -5.059731 | 4.021378 | C | 3.049344  | 1.165221  | -5.767427 |

|   |           |           |          |   |           |           |           |
|---|-----------|-----------|----------|---|-----------|-----------|-----------|
| C | -4.043312 | -4.093258 | 4.337856 | C | 2.854135  | 2.691554  | -5.617714 |
| H | -4.562324 | -3.296847 | 1.920968 | H | 3.597578  | 2.864271  | -3.128919 |
| H | -4.280389 | -6.335325 | 1.859794 | H | 5.640098  | 1.288144  | -4.777546 |
| H | -2.240746 | -4.106038 | 2.233219 | H | 2.871292  | 0.574313  | -3.702823 |
| H | -3.190054 | -6.063701 | 4.347680 | H | 3.783537  | 1.013631  | -6.573148 |
| H | -4.347102 | -4.211508 | 5.383640 | H | 2.690785  | 3.140838  | -6.603616 |
| C | -6.339915 | -4.381995 | 1.451229 | C | 5.549599  | 3.744409  | -3.323561 |
| O | -3.522891 | -5.099861 | 0.357925 | O | 5.300622  | 0.722180  | -2.807739 |
| O | -1.672127 | -6.104402 | 2.204957 | O | 3.982249  | -0.809719 | -4.790329 |
| O | -1.756568 | -4.624074 | 4.769885 | O | 1.799305  | 0.606577  | -6.140010 |
| O | -3.618970 | -2.766687 | 4.099527 | O | 1.758808  | 2.949282  | -4.773064 |
| H | -6.263314 | -5.002299 | 0.556375 | H | 6.541658  | 3.377893  | -3.598446 |
| O | -6.827061 | -3.122717 | 0.997141 | O | 5.559843  | 3.857897  | -1.902333 |
| H | -7.043113 | -4.860781 | 2.146699 | H | 5.397693  | 4.721982  | -3.797790 |
| H | -1.656526 | -6.200113 | 1.226582 | H | 4.523576  | -1.154121 | -4.044165 |
| H | -0.919947 | -4.971680 | 4.399968 | H | 1.809099  | -0.368769 | -6.069100 |
| H | -6.918852 | -2.507477 | 1.750173 | H | 4.723684  | 4.247058  | -1.602967 |
| O | -4.965972 | 0.308939  | 5.621148 | O | -0.575887 | 5.804824  | -4.642732 |
| C | -4.880298 | -0.725274 | 4.615232 | C | 0.631584  | 5.067756  | -4.344720 |
| C | -3.847237 | -1.758792 | 5.090937 | C | 0.683749  | 3.796534  | -5.205701 |
| C | -2.486933 | -1.097263 | 5.347895 | C | -0.593264 | 2.972826  | -4.988828 |
| C | -2.634007 | 0.106547  | 6.278906 | C | -1.860642 | 3.811230  | -5.146329 |
| C | -3.769258 | 1.031011  | 5.802008 | C | -1.778566 | 5.133462  | -4.359473 |
| H | -4.538046 | -0.284276 | 3.673480 | H | 0.621893  | 4.747163  | -3.301133 |
| H | -4.198984 | -2.222390 | 6.023393 | H | 0.795336  | 4.046435  | -6.269981 |
| H | -2.092424 | -0.745900 | 4.383243 | H | -0.542314 | 2.597020  | -3.958896 |
| H | -2.915182 | -0.272761 | 7.272836 | H | -1.955426 | 4.076089  | -6.210212 |
| H | -3.986531 | 1.774112  | 6.577158 | H | -2.576477 | 5.804461  | -4.696135 |
| C | -6.300891 | -1.281188 | 4.408348 | C | 1.792384  | 6.043109  | -4.526715 |
| O | -1.596902 | -2.031466 | 5.948526 | O | -0.660411 | 1.890723  | -5.911355 |
| O | -1.468569 | 0.904983  | 6.366301 | O | -3.022921 | 3.136124  | -4.698876 |
| O | -3.362058 | 1.668889  | 4.611719 | O | -1.925350 | 4.877155  | -2.976011 |
| H | -6.306572 | -2.369379 | 4.499809 | H | 2.708808  | 5.477777  | -4.718514 |
| O | -6.829937 | -1.007455 | 3.116035 | O | 2.046261  | 6.834348  | -3.380616 |
| H | -6.940493 | -0.865152 | 5.198526 | H | 1.581019  | 6.659313  | -5.415745 |
| H | -1.649103 | -2.874944 | 5.444026 | H | 0.209750  | 1.429121  | -5.898223 |
| H | -0.655326 | 0.375174  | 6.492967 | H | -3.125453 | 2.250728  | -5.102285 |
| H | -6.773084 | -0.046241 | 2.949641 | H | 1.217788  | 7.194265  | -3.018615 |
| O | -4.580713 | 4.873442  | 3.293410 | O | -3.271617 | 7.074893  | -0.351207 |
| C | -4.526473 | 3.431672  | 3.379697 | C | -2.255217 | 6.502631  | -1.201379 |
| C | -3.524718 | 3.082169  | 4.490365 | C | -2.929574 | 5.582625  | -2.230009 |
| C | -2.139562 | 3.667011  | 4.174471 | C | -3.833777 | 4.529276  | -1.565196 |
| C | -2.238483 | 5.166119  | 3.883190 | C | -4.757858 | 5.168453  | -0.524549 |
| C | -3.367967 | 5.466618  | 2.878337 | C | -3.967526 | 6.106833  | 0.399369  |
| H | -4.168648 | 3.018707  | 2.429532 | H | -1.575280 | 5.903770  | -0.588400 |
| H | -3.884567 | 3.504124  | 5.439474 | H | -3.545202 | 6.187369  | -2.910650 |
| H | -1.761648 | 3.153687  | 3.279821 | H | -3.203448 | 3.784813  | -1.062537 |
| H | -2.498615 | 5.670008  | 4.825895 | H | -5.503010 | 5.778277  | -1.056705 |
| H | -3.561347 | 6.544590  | 2.848386 | H | -4.651759 | 6.661589  | 1.051125  |
| C | -5.964628 | 2.922938  | 3.607113 | C | -1.450236 | 7.668065  | -1.805447 |

|   |           |          |           |   |           |           |           |
|---|-----------|----------|-----------|---|-----------|-----------|-----------|
| O | -1.248783 | 3.484139 | 5.269244  | O | -4.645790 | 3.893020  | -2.552691 |
| O | -1.046162 | 5.717198 | 3.344308  | O | -5.400161 | 4.224710  | 0.317782  |
| O | -2.973852 | 5.003999 | 1.608896  | O | -3.087303 | 5.314886  | 1.164353  |
| H | -6.065914 | 2.462086 | 4.592020  | H | -1.498465 | 7.650411  | -2.897007 |
| O | -6.351431 | 1.914765 | 2.677394  | O | -0.068849 | 7.610978  | -1.482875 |
| H | -6.637230 | 3.788522 | 3.557724  | H | -1.907613 | 8.604751  | -1.459099 |
| H | -1.307021 | 2.544410 | 5.555359  | H | -4.045022 | 3.575363  | -3.263080 |
| H | -0.263130 | 5.462604 | 3.870563  | H | -5.808051 | 3.500794  | -0.198431 |
| H | -6.363243 | 2.297542 | 1.784501  | H | 0.026372  | 7.625626  | -0.509532 |
| O | -4.214588 | 6.039518 | -1.697107 | O | -1.315776 | 6.020498  | 4.298193  |
| C | -4.212740 | 5.266937 | -0.475763 | C | -1.501657 | 5.999364  | 2.865762  |
| C | -3.130762 | 5.836522 | 0.452734  | C | -2.932719 | 5.535278  | 2.567236  |
| C | -1.757451 | 5.849234 | -0.236095 | C | -3.223878 | 4.185358  | 3.229559  |
| C | -1.827680 | 6.495165 | -1.618328 | C | -2.872474 | 4.198002  | 4.711844  |
| C | -3.018234 | 5.945295 | -2.433275 | C | -1.447855 | 4.760013  | 4.912563  |
| H | -3.952419 | 4.227989 | -0.695419 | H | -0.799377 | 5.286331  | 2.423183  |
| H | -3.392754 | 6.859815 | 0.756504  | H | -3.656502 | 6.283643  | 2.920122  |
| H | -1.415199 | 4.814612 | -0.363734 | H | -2.579432 | 3.439050  | 2.749306  |
| H | -2.005500 | 7.572725 | -1.482727 | H | -3.565951 | 4.873692  | 5.234036  |
| H | -3.165550 | 6.565052 | -3.324627 | H | -1.269545 | 4.931767  | 5.979808  |
| C | -5.643961 | 5.282807 | 0.082901  | C | -1.169073 | 7.401745  | 2.320777  |
| O | -0.819411 | 6.574995 | 0.563542  | O | -4.597169 | 3.834682  | 3.064668  |
| O | -0.656422 | 6.283638 | -2.390691 | O | -2.908743 | 2.906081  | 5.298511  |
| O | -2.758163 | 4.608818 | -2.811025 | O | -0.511962 | 3.826309  | 4.407736  |
| H | -5.619350 | 5.403901 | 1.167835  | H | -1.990789 | 7.781294  | 1.709707  |
| O | -6.352756 | 4.074012 | -0.147343 | O | -0.023621 | 7.414515  | 1.475314  |
| H | -6.162797 | 6.152137 | -0.347241 | H | -1.038519 | 8.073608  | 3.180099  |
| H | -0.885811 | 6.228714 | 1.478351  | H | -4.829570 | 3.967713  | 2.118223  |
| H | 0.151117  | 6.427249 | -1.858224 | H | -3.701323 | 2.409080  | 5.015661  |
| H | -6.375361 | 3.881749 | -1.102980 | H | 0.713232  | 7.034851  | 1.990494  |
| O | -4.143947 | 2.784379 | -5.703094 | O | 2.978885  | 3.558040  | 5.556187  |
| C | -4.122716 | 3.250121 | -4.335752 | C | 1.956070  | 3.935257  | 4.609486  |
| C | -2.933134 | 4.211584 | -4.176222 | C | 0.617432  | 3.482753  | 5.210516  |
| C | -1.625612 | 3.518806 | -4.575538 | C | 0.620096  | 1.955197  | 5.357847  |
| C | -1.735481 | 2.901983 | -5.967699 | C | 1.831056  | 1.501268  | 6.179580  |
| C | -3.001607 | 2.028709 | -6.049067 | C | 3.146272  | 2.162584  | 5.705940  |
| H | -3.963908 | 2.390498 | -3.678965 | H | 2.129903  | 3.412707  | 3.661496  |
| H | -3.083965 | 5.096910 | -4.809799 | H | 0.519274  | 3.937737  | 6.206207  |
| H | -1.449639 | 2.702429 | -3.861906 | H | 0.685108  | 1.513071  | 4.351676  |
| H | -1.842359 | 3.714027 | -6.702279 | H | 1.659523  | 1.846148  | 7.210860  |
| H | -3.163225 | 1.694883 | -7.079919 | H | 3.910060  | 2.044358  | 6.482105  |
| C | -5.504631 | 3.850507 | -4.023265 | C | 2.110636  | 5.442790  | 4.350595  |
| O | -0.548443 | 4.448040 | -4.553326 | O | -0.557635 | 1.518262  | 6.024447  |
| O | -0.634649 | 2.076172 | -6.302554 | O | 2.028189  | 0.099896  | 6.158799  |
| O | -2.834317 | 0.926194 | -5.188039 | O | 3.583337  | 1.563138  | 4.505806  |
| H | -5.405417 | 4.858938 | -3.615716 | H | 1.493442  | 6.032492  | 5.032784  |
| O | -6.224702 | 3.115076 | -3.039416 | O | 1.698977  | 5.800661  | 3.034628  |
| H | -6.064924 | 3.913019 | -4.965975 | H | 3.163000  | 5.702160  | 4.521291  |
| H | -0.609815 | 4.971705 | -3.722295 | H | -1.329197 | 1.986536  | 5.632449  |
| H | 0.216400  | 2.491101 | -6.053506 | H | 1.185891  | -0.385713 | 6.278574  |

|   |           |           |           |   |          |           |           |
|---|-----------|-----------|-----------|---|----------|-----------|-----------|
| H | -6.287167 | 2.178669  | -3.315378 | H | 2.274301 | 5.351849  | 2.394025  |
| O | -4.498177 | -2.344330 | -5.394993 | O | 7.008303 | 1.197077  | 3.196504  |
| C | -4.308616 | -1.009502 | -4.873362 | C | 5.734888 | 1.850959  | 3.381687  |
| C | -3.135548 | -0.391174 | -5.648833 | C | 4.922256 | 1.046252  | 4.407722  |
| C | -1.869487 | -1.230857 | -5.432270 | C | 4.774989 | -0.413079 | 3.945055  |
| C | -2.123359 | -2.688618 | -5.814899 | C | 6.106521 | -1.034279 | 3.510494  |
| C | -3.409319 | -3.210856 | -5.145367 | C | 6.892998 | -0.075448 | 2.595954  |
| H | -4.044982 | -1.064302 | -3.811132 | H | 5.189763 | 1.827734  | 2.433522  |
| H | -3.383023 | -0.368420 | -6.719715 | H | 5.413144 | 1.074519  | 5.390057  |
| H | -1.615729 | -1.183069 | -4.364531 | H | 4.111324 | -0.397282 | 3.071041  |
| H | -2.281927 | -2.724665 | -6.903559 | H | 6.711204 | -1.200492 | 4.414477  |
| H | -3.692573 | -4.172565 | -5.587615 | H | 7.917269 | -0.441222 | 2.462395  |
| C | -5.651792 | -0.265584 | -4.992825 | C | 6.003680 | 3.318826  | 3.738458  |
| O | -0.797924 | -0.734623 | -6.229353 | O | 4.214245 | -1.215081 | 4.978403  |
| O | -1.073954 | -3.565086 | -5.442147 | O | 5.948908 | -2.242343 | 2.785166  |
| O | -3.170727 | -3.351572 | -3.767567 | O | 6.225928 | -0.001236 | 1.361266  |
| H | -5.558138 | 0.607557  | -5.642723 | H | 5.261555 | 3.659830  | 4.465053  |
| O | -6.119225 | 0.237103  | -3.744463 | O | 5.889647 | 4.192000  | 2.630104  |
| H | -6.378449 | -0.954756 | -5.442649 | H | 6.995141 | 3.374556  | 4.213336  |
| H | -0.763475 | 0.243711  | -6.126325 | H | 3.422118 | -0.744645 | 5.325625  |
| H | -0.198255 | -3.195838 | -5.668326 | H | 5.299736 | -2.842848 | 3.201228  |
| H | -6.237642 | -0.510317 | -3.128656 | H | 6.505809 | 3.927935  | 1.915699  |
| O | -4.972556 | -5.515924 | -1.412377 | O | 7.434056 | 1.102820  | -1.933292 |
| C | -4.674510 | -4.261794 | -2.072945 | C | 6.975536 | 1.260429  | -0.572693 |
| C | -3.575021 | -4.549830 | -3.105345 | C | 6.942800 | -0.106680 | 0.125144  |
| C | -2.326895 | -5.092378 | -2.396775 | C | 6.160227 | -1.133387 | -0.695497 |
| C | -2.668023 | -6.302168 | -1.528602 | C | 6.627155 | -1.172599 | -2.144627 |
| C | -3.899296 | -6.015164 | -0.643490 | C | 6.631928 | 0.256874  | -2.724183 |
| H | -4.286466 | -3.543785 | -1.342016 | H | 5.957500 | 1.662384  | -0.579191 |
| H | -3.941908 | -5.283670 | -3.837183 | H | 7.962825 | -0.474925 | 0.306187  |
| H | -1.952599 | -4.293659 | -1.746941 | H | 5.111657 | -0.819389 | -0.694484 |
| H | -2.932256 | -7.137698 | -2.194001 | H | 7.662351 | -1.543689 | -2.180707 |
| H | -4.262718 | -6.946406 | -0.193961 | H | 7.095856 | 0.251811  | -3.716992 |
| C | -5.989840 | -3.690860 | -2.636049 | C | 7.909569 | 2.277343  | 0.100686  |
| O | -1.324983 | -5.477850 | -3.335580 | O | 6.289240 | -2.431847 | -0.113523 |
| O | -1.604029 | -6.684872 | -0.663367 | O | 5.793430 | -1.967427 | -2.975065 |
| H | -5.903091 | -3.519090 | -3.710759 | H | 8.177160 | 1.942788  | 1.105394  |
| O | -6.333207 | -2.426428 | -2.075877 | O | 7.323602 | 3.561927  | 0.271173  |
| H | -6.781189 | -4.433490 | -2.467349 | H | 8.828601 | 2.335629  | -0.499286 |
| H | -1.216733 | -4.736850 | -3.971345 | H | 6.103241 | -2.338499 | 0.845972  |
| H | -0.759155 | -6.686999 | -1.149658 | H | 5.576288 | -2.817528 | -2.547072 |
| H | -6.502984 | -2.540955 | -1.123370 | H | 6.847165 | 3.797394  | -0.548805 |
| C | -5.672021 | -0.090235 | 0.232659  | C | 3.336579 | 4.801079  | 0.414842  |
| C | -5.551717 | 0.970188  | -0.654227 | C | 2.378928 | 5.340048  | -0.445779 |
| C | -4.283287 | 1.464280  | -0.959173 | C | 1.248464 | 4.583310  | -0.764086 |
| C | -3.128571 | 0.915375  | -0.400148 | C | 1.057797 | 3.289667  | -0.267133 |
| C | -3.251977 | -0.158100 | 0.500616  | C | 2.005877 | 2.762850  | 0.628206  |
| C | -4.524483 | -0.642305 | 0.801679  | C | 3.134173 | 3.523730  | 0.951671  |
| C | -2.032036 | -0.820616 | 1.098152  | C | 1.826854 | 1.381138  | 1.209616  |
| C | -1.089229 | -1.388610 | 0.053140  | C | 1.843786 | 0.283812  | 0.164391  |

|   |           |           |           |   |           |           |           |
|---|-----------|-----------|-----------|---|-----------|-----------|-----------|
| C | -0.667172 | -2.706192 | 0.261492  | C | 2.675892  | -0.809799 | 0.429294  |
| C | 0.097783  | -3.415664 | -0.649980 | C | 2.865892  | -1.854658 | -0.461901 |
| C | 0.433266  | -2.800120 | -1.855713 | C | 2.246429  | -1.780315 | -1.707978 |
| C | 0.058976  | -1.485319 | -2.076996 | C | 1.401210  | -0.718610 | -1.991013 |
| C | -0.656070 | -0.725092 | -1.124281 | C | 1.122743  | 0.306213  | -1.056833 |
| C | -1.787493 | 1.529364  | -0.739923 | C | -0.163489 | 2.501977  | -0.713593 |
| N | -0.869395 | 0.633037  | -1.466132 | N | 0.154245  | 1.261762  | -1.456081 |
| C | -1.128413 | 2.193103  | 0.483456  | C | -1.202840 | 2.280729  | 0.407791  |
| C | 0.345267  | 1.390372  | -1.816735 | C | -1.110426 | 0.688982  | -1.956472 |
| C | 1.044397  | 1.909549  | -0.565323 | C | -2.031117 | 0.329930  | -0.798629 |
| N | 0.159301  | 2.816488  | 0.167845  | N | -2.380731 | 1.540799  | -0.058010 |
| C | 0.775968  | 3.237201  | 1.413531  | C | -3.241282 | 1.232093  | 1.071118  |
| H | -6.646797 | -0.492464 | 0.484053  | H | 4.229047  | 5.354103  | 0.695735  |
| H | -6.429543 | 1.419224  | -1.102250 | H | 2.503781  | 6.318473  | -0.895827 |
| H | -4.198258 | 2.295366  | -1.645699 | H | 0.497484  | 5.024560  | -1.406121 |
| H | -4.626810 | -1.453403 | 1.508547  | H | 3.879829  | 3.134962  | 1.633123  |
| H | -2.363860 | -1.643614 | 1.735899  | H | 2.632432  | 1.191844  | 1.921453  |
| H | -1.507442 | -0.135131 | 1.773585  | H | 0.906780  | 1.339626  | 1.804197  |
| H | -0.964466 | -3.195898 | 1.181075  | H | 3.212130  | -0.827179 | 1.371554  |
| H | 0.351594  | -4.444669 | -0.439097 | H | 3.535423  | -2.663685 | -0.199929 |
| H | 0.956758  | -3.343426 | -2.632566 | H | 2.431856  | -2.526447 | -2.470989 |
| H | 0.301622  | -1.021657 | -3.027196 | H | 0.953446  | -0.658810 | -2.976821 |
| H | -1.982579 | 2.343910  | -1.447218 | H | -0.672764 | 3.125140  | -1.456702 |
| H | -0.992796 | 1.462261  | 1.293355  | H | -0.751324 | 1.767108  | 1.270870  |
| H | -1.801205 | 2.966970  | 0.864716  | H | -1.536982 | 3.262464  | 0.757388  |
| H | 0.059347  | 2.240431  | -2.446105 | H | -1.608668 | 1.431470  | -2.588990 |
| H | 1.028297  | 0.767416  | -2.391841 | H | -0.915414 | -0.189482 | -2.567695 |
| H | 1.952373  | 2.456374  | -0.845031 | H | -2.954256 | -0.120049 | -1.182820 |
| H | 1.356384  | 1.046255  | 0.055088  | H | -1.534607 | -0.427407 | -0.160730 |
| H | 0.897309  | 2.385314  | 2.112435  | H | -2.684172 | 0.750433  | 1.898364  |
| H | 0.159242  | 3.992391  | 1.904100  | H | -3.711997 | 2.135516  | 1.456468  |
| H | 1.761029  | 3.663001  | 1.233089  | H | -4.033461 | 0.549170  | 0.766784  |

| [ $\beta$ -CD]-[ $\beta$ -CD] DIMER VACUUM |                |           |           |                                       |                |           |           |
|--------------------------------------------|----------------|-----------|-----------|---------------------------------------|----------------|-----------|-----------|
| [ $\beta$ -CD-CCCW]-[ $\beta$ -CD-CCCW]    |                |           |           | [ $\beta$ -CD-EXP]-[ $\beta$ -CD-EXP] |                |           |           |
| E                                          | -8550.94253914 |           |           | E                                     | -8550.87246983 |           |           |
| Atom                                       | x [Å]          | y [Å]     | z [Å]     | Atom                                  | x [Å]          | y [Å]     | z [Å]     |
| O                                          | -4.812899      | -5.087230 | 2.797491  | C                                     | -5.221245      | -4.959359 | -0.307770 |
| C                                          | -4.627504      | -4.597541 | 1.450491  | C                                     | -5.741969      | -3.823597 | 0.584871  |
| C                                          | -3.576702      | -5.504930 | 0.798204  | O                                     | -6.056140      | -2.739688 | -0.267533 |
| C                                          | -2.253882      | -5.445783 | 1.574584  | C                                     | -4.708563      | -3.470981 | 1.652256  |
| C                                          | -2.480243      | -5.758447 | 3.052924  | O                                     | -5.294385      | -2.548590 | 2.559830  |
| C                                          | -3.661179      | -4.931958 | 3.597492  | C                                     | -4.231191      | -4.726675 | 2.399830  |
| H                                          | -4.238218      | -3.574505 | 1.484770  | O                                     | -3.107898      | -4.319039 | 3.184523  |
| H                                          | -3.945800      | -6.540228 | 0.792265  | C                                     | -3.820106      | -5.838514 | 1.420513  |
| H                                          | -1.860975      | -4.421760 | 1.489044  | O                                     | -4.888628      | -6.082156 | 0.486023  |
| H                                          | -2.754347      | -6.821147 | 3.132758  | C                                     | -3.520647      | -7.172064 | 2.078140  |
| H                                          | -3.937967      | -5.291136 | 4.594868  | O                                     | -2.938076      | -8.005266 | 1.078774  |
| C                                          | -6.007363      | -4.543183 | 0.769447  | C                                     | -3.075538      | -4.594910 | 4.570882  |
| O                                          | -3.257106      | -5.089147 | -0.526638 | C                                     | -2.853828      | -3.275677 | 5.337242  |
| O                                          | -1.331553      | -6.385262 | 1.031659  | O                                     | -3.865592      | -2.368255 | 4.932388  |
| O                                          | -1.366056      | -5.471359 | 3.879403  | C                                     | -1.439643      | -2.743642 | 5.111402  |
| O                                          | -3.259318      | -3.584312 | 3.649209  | O                                     | -1.220869      | -1.665613 | 6.012134  |
| H                                          | -6.014045      | -5.139354 | -0.144874 | C                                     | -0.417145      | -3.855474 | 5.356796  |
| O                                          | -6.368657      | -3.222898 | 0.379641  | O                                     | 0.873370       | -3.332262 | 5.022565  |
| H                                          | -6.743341      | -4.968200 | 1.464628  | C                                     | -0.738495      | -5.093067 | 4.517161  |
| H                                          | -1.347349      | -6.291407 | 0.052568  | O                                     | -2.067460      | -5.533025 | 4.875824  |
| H                                          | -0.523703      | -5.730477 | 3.454032  | C                                     | 0.241091       | -6.257192 | 4.736320  |
| H                                          | -6.425152      | -2.657127 | 1.181052  | O                                     | 0.756168       | -6.357431 | 6.051372  |
| O                                          | -4.815549      | -0.983804 | 5.719353  | C                                     | 1.872558       | -3.309077 | 6.017720  |
| C                                          | -4.629532      | -1.731680 | 4.496794  | C                                     | 2.493892       | -1.906917 | 6.063143  |
| C                                          | -3.579199      | -2.807678 | 4.800159  | O                                     | 1.441953       | -1.002752 | 6.343765  |
| C                                          | -2.256452      | -2.164128 | 5.238720  | C                                     | 3.217293       | -1.609680 | 4.754092  |
| C                                          | -2.483280      | -1.203100 | 6.404665  | O                                     | 3.909932       | -0.375170 | 4.886170  |
| C                                          | -3.663865      | -0.261783 | 6.097320  | C                                     | 4.203246       | -2.736536 | 4.434863  |
| H                                          | -4.239534      | -1.067177 | 3.718538  | O                                     | 4.682193       | -2.498197 | 3.108932  |
| H                                          | -3.948847      | -3.457729 | 5.605705  | C                                     | 3.547806       | -4.126193 | 4.504721  |
| H                                          | -1.862826      | -1.592739 | 4.384974  | O                                     | 2.862045       | -4.291244 | 5.765961  |
| H                                          | -2.758038      | -1.803173 | 7.285155  | C                                     | 4.556895       | -5.256215 | 4.372640  |
| H                                          | -3.940956      | 0.294159  | 6.999835  | O                                     | 5.615281       | -5.051858 | 5.299258  |
| C                                          | -6.009222      | -2.229753 | 4.028634  | C                                     | 6.077007       | -2.487469 | 2.868549  |
| O                                          | -1.334612      | -3.174527 | 5.635464  | C                                     | 6.453408       | -1.144158 | 2.212884  |
| O                                          | -1.369103      | -0.378155 | 6.696122  | O                                     | 5.981199       | -0.104953 | 3.057764  |
| O                                          | -3.261319      | 0.618750  | 5.076068  | C                                     | 5.898916       | -1.060585 | 0.792570  |
| H                                          | -6.016385      | -3.316331 | 3.924924  | O                                     | 6.451471       | 0.091125  | 0.164294  |
| O                                          | -6.369098      | -1.711378 | 2.752922  | C                                     | 6.265073       | -2.322501 | 0.007032  |
| H                                          | -6.745717      | -1.950650 | 4.793647  | O                                     | 5.620375       | -2.223076 | -1.268966 |
| H                                          | -1.350310      | -3.881828 | 4.951967  | C                                     | 5.819573       | -3.582233 | 0.753176  |
| H                                          | -0.526808      | -0.872428 | 6.633852  | O                                     | 6.458083       | -3.570760 | 2.050494  |
| H                                          | -6.425490      | -0.732064 | 2.810184  | C                                     | 6.190698       | -4.895018 | 0.042158  |
| O                                          | -4.816692      | 3.858946  | 4.332955  | O                                     | 7.380391       | -4.823247 | -0.725417 |
| C                                          | -4.630882      | 2.436808  | 4.155269  | C                                     | 6.412216       | -2.253647 | -2.431678 |
| C                                          | -3.581100      | 2.002866  | 5.186134  | C                                     | 5.993781       | -1.094977 | -3.348276 |
| C                                          | -2.258068      | 2.746745  | 4.957049  | O                                     | 6.158164       | 0.096509  | -2.604228 |
| C                                          | -2.484613      | 4.257579  | 4.932532  | C                                     | 4.565917       | -1.306748 | -3.845057 |
| C                                          | -3.664791      | 4.604483  | 4.004616  | O                                     | 4.274106       | -0.325047 | -4.829890 |
| H                                          | -4.240501      | 2.242849  | 3.150635  | C                                     | 4.382950       | -2.712108 | -4.438250 |
| H                                          | -3.951269      | 2.227536  | 6.196387  | O                                     | 2.976640       | -2.871440 | -4.636536 |
| H                                          | -1.864020      | 2.435368  | 3.978233  | C                                     | 4.918774       | -3.797062 | -3.490363 |
| H                                          | -2.759611      | 4.571876  | 5.950583  | O                                     | 6.273791       | -3.484914 | -3.115911 |
| H                                          | -3.941768      | 5.656747  | 4.132724  | C                                     | 4.955527       | -5.187750 | -4.094878 |
| C                                          | -6.010745      | 1.760509  | 4.252184  | O                                     | 5.245244       | -6.095082 | -3.034645 |
| O                                          | -1.336854      | 2.426735  | 5.994845  | C                                     | 2.476913       | -3.262554 | -5.899727 |
| O                                          | -1.370173      | 4.999631  | 4.469597  | C                                     | 1.409760       | -2.243973 | -6.349052 |
| O                                          | -3.261756      | 4.355206  | 2.679569  | O                                     | 2.004775       | -0.957276 | -6.312057 |
| H                                          | -6.018288      | 1.001783  | 5.036863  | C                                     | 0.152454       | -2.352235 | -5.487162 |
| O                                          | -6.370426      | 1.086672  | 3.051253  | O                                     | -0.871145      | -1.562625 | -6.081600 |
| H                                          | -6.747169      | 2.532719  | 4.510940  | C                                     | -0.290744      | -3.814380 | -5.387726 |
| H                                          | -1.352972      | 1.451375  | 6.121692  | O                                     | -1.395350      | -3.852244 | -4.478974 |
| H                                          | -0.528042      | 4.642568  | 4.817386  | C                                     | 0.857452       | -4.702957 | -4.903410 |
| H                                          | -6.426578      | 1.742256  | 2.321464  | O                                     | 1.942435       | -4.566188 | -5.848416 |
| O                                          | -4.815766      | 5.794668  | -0.317523 | C                                     | 0.492846       | -6.191064 | -4.785808 |
| C                                          | -4.630550      | 4.769195  | 0.683822  | O                                     | -0.451419      | -6.645839 | -5.738401 |
| C                                          | -3.580974      | 5.304436  | 1.666095  | C                                     | -2.599982      | -4.450148 | -4.900975 |

|   |           |           |           |   |           |           |           |
|---|-----------|-----------|-----------|---|-----------|-----------|-----------|
| C | -2.257629 | 5.588792  | 0.942132  | C | -3.758471 | -3.485515 | -4.607375 |
| C | -2.483542 | 6.511696  | -0.254384 | O | -3.453053 | -2.265450 | -5.260117 |
| C | -3.663479 | 6.002620  | -1.104600 | C | -3.963254 | -3.338745 | -3.102743 |
| H | -4.240170 | 3.862580  | 0.209522  | O | -5.165287 | -2.611049 | -2.883722 |
| H | -3.951007 | 6.234445  | 2.120267  | C | -4.051408 | -4.718846 | -2.442798 |
| H | -1.863707 | 4.629298  | 0.575382  | O | -4.103346 | -4.498562 | -1.028730 |
| H | -2.758528 | 7.503630  | 0.134577  | C | -2.848542 | -5.595075 | -2.806443 |
| H | -3.940049 | 6.758833  | -1.847594 | O | -2.800662 | -5.696414 | -4.254374 |
| C | -6.010717 | 4.423739  | 1.272547  | C | -2.906949 | -7.015047 | -2.215252 |
| O | -1.336560 | 6.200345  | 1.839776  | O | -4.220193 | -7.510779 | -2.024142 |
| O | -1.368716 | 6.612239  | -1.122711 | H | -6.008575 | -5.299120 | -0.987099 |
| O | -3.260334 | 4.811127  | -1.735599 | H | -6.647968 | -4.188419 | 1.091270  |
| H | -6.018520 | 4.563933  | 2.355014  | H | -6.202571 | -1.907059 | 0.228235  |
| O | -6.370896 | 3.064873  | 1.050249  | H | -3.833148 | -3.029872 | 1.153651  |
| H | -6.746737 | 5.107898  | 0.830073  | H | -4.699476 | -2.464214 | 3.341142  |
| H | -1.353050 | 5.691251  | 2.681344  | H | -5.044004 | -5.079995 | 3.049930  |
| H | -0.526781 | 6.661300  | -0.626365 | H | -2.926492 | -5.507911 | 0.878128  |
| H | -6.426448 | 2.903018  | 0.082647  | H | -4.460958 | -7.597440 | 2.458971  |
| O | -4.812926 | 3.365348  | -4.730322 | H | -2.840086 | -7.014461 | 2.924760  |
| C | -4.628349 | 3.508921  | -3.304194 | H | -2.893514 | -8.907455 | 1.418112  |
| C | -3.578800 | 4.610539  | -3.109777 | H | -4.017662 | -5.054260 | 4.889609  |
| C | -2.255136 | 4.221689  | -3.782758 | H | -2.955419 | -3.500081 | 6.409169  |
| C | -2.480371 | 3.861234  | -5.250356 | H | -3.639496 | -1.446983 | 5.175252  |
| C | -3.660410 | 2.879346  | -5.383039 | H | -1.347628 | -2.407310 | 4.067772  |
| H | -4.238276 | 2.572804  | -2.890867 | H | -0.258410 | -1.449952 | 6.017246  |
| H | -3.948496 | 5.545476  | -3.553996 | H | -0.442099 | -4.148448 | 6.412199  |
| H | -1.861446 | 3.336858  | -3.260854 | H | -0.733720 | -4.832276 | 3.450959  |
| H | -2.754874 | 4.783708  | -5.783791 | H | 1.050156  | -6.163171 | 4.000523  |
| H | -3.936416 | 2.770054  | -6.437672 | H | -0.298854 | -7.183850 | 4.512457  |
| C | -6.008791 | 3.753923  | -2.667675 | H | 1.596101  | -5.869649 | 6.067422  |
| O | -1.334098 | 5.304803  | -3.701127 | H | 1.449717  | -3.561557 | 6.995028  |
| O | -1.365370 | 3.244578  | -5.869494 | H | 3.234446  | -1.896590 | 6.876137  |
| O | -3.257892 | 1.643012  | -4.844718 | H | 1.707849  | -0.073484 | 6.181038  |
| H | -6.016782 | 4.687653  | -2.102395 | H | 2.473929  | -1.556196 | 3.945534  |
| O | -6.369443 | 2.732990  | -1.743946 | H | 4.565837  | -0.308390 | 4.153662  |
| H | -6.744428 | 3.834573  | -3.478790 | H | 5.029005  | -2.700846 | 5.153017  |
| H | -1.350958 | 5.645573  | -2.778483 | H | 2.820967  | -4.213788 | 3.686858  |
| H | -0.523608 | 3.664460  | -5.599807 | H | 4.926935  | -5.253763 | 3.340323  |
| H | -6.425110 | 1.875549  | -2.220628 | H | 4.037709  | -6.209126 | 4.557254  |
| O | -4.811031 | -1.599250 | -5.582649 | H | 6.345346  | -5.631012 | 5.048987  |
| C | -4.626462 | -0.394943 | -4.805431 | H | 6.623360  | -2.618248 | 3.807518  |
| C | -3.576338 | 0.443707  | -5.544916 | H | 7.550382  | -1.105588 | 2.146290  |
| C | -2.252837 | -0.325281 | -5.660050 | H | 5.978918  | 0.756733  | 2.596003  |
| C | -2.478238 | -1.697105 | -6.293939 | H | 4.802290  | -0.987806 | 0.843589  |
| C | -3.658655 | -2.412824 | -5.609365 | H | 6.248489  | 0.047904  | -0.798976 |
| H | -4.236947 | -0.655742 | -3.815698 | H | 7.350948  | -2.374217 | -0.124949 |
| H | -3.945597 | 0.679485  | -6.552972 | H | 4.732041  | -3.558979 | 0.901385  |
| H | -1.859715 | -0.469482 | -4.642718 | H | 5.349936  | -5.211874 | -0.583201 |
| H | -2.752443 | -1.538512 | -7.347741 | H | 6.325875  | -5.652570 | 0.824179  |
| H | -3.934734 | -3.305460 | -6.181524 | H | 7.103040  | -4.743642 | -1.652446 |
| C | -6.006803 | 0.255863  | -4.600600 | H | 7.474072  | -2.173483 | -2.180986 |
| O | -1.331136 | 0.413891  | -6.455138 | H | 6.665768  | -1.099978 | -4.219371 |
| O | -1.363472 | -2.566022 | -6.198071 | H | 5.721749  | 0.863197  | -3.030509 |
| O | -3.256492 | -2.762864 | -4.307045 | H | 3.884572  | -1.217159 | -2.986650 |
| H | -6.014361 | 1.280020  | -4.978068 | H | 3.421967  | -0.566409 | -5.263079 |
| O | -6.367961 | 0.341435  | -3.226572 | H | 4.912788  | -2.759787 | -5.400145 |
| H | -6.742400 | -0.327749 | -5.169693 | H | 4.286186  | -3.819489 | -2.595166 |
| H | -1.347988 | 1.347616  | -6.146008 | H | 5.734335  | -5.213739 | -4.871488 |
| H | -0.521373 | -2.093006 | -6.355454 | H | 3.987451  | -5.404662 | -4.564451 |
| H | -6.424190 | -0.565937 | -2.853665 | H | 5.436965  | -6.960907 | -3.415004 |
| O | -4.810539 | -5.361272 | -2.232684 | H | 3.287490  | -3.298519 | -6.635907 |
| C | -4.625890 | -4.002771 | -2.689781 | H | 1.127893  | -2.501011 | -7.380657 |
| C | -3.575220 | -4.058038 | -3.806039 | H | 1.329098  | -0.250002 | -6.359250 |
| C | -2.251971 | -4.627324 | -3.275862 | H | 0.384809  | -1.990138 | -4.474331 |
| C | -2.477457 | -5.978005 | -2.598213 | H | -1.732671 | -1.815054 | -5.676380 |
| C | -3.658471 | -5.889189 | -1.612516 | H | -0.603003 | -4.170703 | -6.375590 |
| H | -4.236811 | -3.391395 | -1.868698 | H | 1.205711  | -4.355930 | -3.922189 |
| H | -3.943927 | -4.699209 | -4.619100 | H | 0.139057  | -6.374215 | -3.763604 |
| H | -1.859270 | -3.921615 | -2.528832 | H | 1.417912  | -6.763135 | -4.919841 |
| H | -2.750951 | -6.703438 | -3.379103 | H | -1.319637 | -6.620179 | -5.304146 |
| H | -3.934562 | -6.893113 | -1.271506 | H | -2.563606 | -4.674547 | -5.971337 |
| C | -6.006115 | -3.437039 | -3.071584 | H | -4.673235 | -3.925982 | -5.030329 |

|   |           |           |           |   |           |           |           |
|---|-----------|-----------|-----------|---|-----------|-----------|-----------|
| O | -1.329702 | -4.788386 | -4.348982 | H | -4.013651 | -1.531111 | -4.937342 |
| O | -1.362942 | -6.444017 | -1.858212 | H | -3.099855 | -2.805481 | -2.678224 |
| H | -6.013102 | -3.093566 | -4.107645 | H | -5.383107 | -2.649616 | -1.922902 |
| O | -6.367843 | -2.309478 | -2.282011 | H | -4.959041 | -5.231591 | -2.778043 |
| H | -6.741655 | -4.245958 | -2.970546 | H | -1.924764 | -5.109137 | -2.469231 |
| H | -1.346527 | -3.964852 | -4.886743 | H | -2.351686 | -7.028062 | -1.271924 |
| H | -0.520851 | -6.273960 | -2.326791 | H | -2.382400 | -7.677248 | -2.915752 |
| H | -6.424254 | -2.583519 | -1.340058 | H | -4.412161 | -7.420280 | -1.076537 |
| O | 4.817167  | -4.449616 | -3.723537 | C | 5.221615  | 4.958222  | -0.328283 |
| C | 4.631004  | -4.228708 | -2.307550 | C | 5.743395  | 3.824630  | 0.566512  |
| C | 3.581363  | -5.246022 | -1.842488 | O | 6.056010  | 2.738472  | -0.283594 |
| C | 2.258400  | -5.040519 | -2.593352 | C | 4.711477  | 3.475070  | 1.636337  |
| C | 2.485318  | -5.061813 | -4.104195 | O | 5.298412  | 2.554957  | 2.545503  |
| C | 3.665286  | -4.144503 | -4.478913 | C | 4.235402  | 4.732807  | 2.381299  |
| H | 4.240451  | -3.218704 | -2.144221 | O | 3.113046  | 4.327427  | 3.168517  |
| H | 3.951836  | -6.262638 | -2.035792 | C | 3.823313  | 5.842278  | 1.399707  |
| H | 1.863623  | -4.052944 | -2.312005 | O | 4.890586  | 6.083172  | 0.463111  |
| H | 2.760707  | -6.088867 | -4.387324 | C | 3.525176  | 7.177604  | 2.054341  |
| H | 3.942464  | -4.304527 | -5.526741 | O | 2.941552  | 8.008451  | 1.053626  |
| C | 6.010690  | -4.304730 | -1.628189 | C | 3.082474  | 4.607025  | 4.554156  |
| C | 3.261326  | -5.093232 | -0.462533 | C | 2.861786  | 3.289854  | 5.324372  |
| O | 1.337799  | -6.068766 | -2.242087 | O | 3.872997  | 2.381343  | 4.920552  |
| O | 1.370890  | -4.621982 | -4.860197 | C | 1.447305  | 2.757215  | 5.101889  |
| O | 3.261884  | -2.812559 | -4.270238 | O | 1.229744  | 1.681604  | 6.005792  |
| H | 6.017919  | -5.065473 | -0.845464 | C | 0.425138  | 3.869725  | 5.345647  |
| O | 6.370312  | -3.083569 | -0.991737 | O | -0.865846 | 3.345632  | 5.014598  |
| H | 6.747289  | -4.587387 | -2.391805 | O | 0.745364  | 5.104888  | 4.502081  |
| H | 1.353389  | -6.165390 | -1.263258 | O | 2.074745  | 5.545949  | 4.857777  |
| H | 0.528775  | -4.959140 | -4.493094 | C | -0.234031 | 6.269587  | 4.719062  |
| H | 6.426613  | -2.374296 | -1.669451 | O | -0.747218 | 6.373808  | 6.034537  |
| O | 4.815862  | 0.139028  | -5.801091 | C | -1.863618 | 3.324994  | 6.011214  |
| C | 4.630627  | -0.830286 | -4.745320 | C | -2.484793 | 1.922910  | 6.061224  |
| C | 3.580987  | -1.828525 | -5.250042 | O | -1.432394 | 1.019546  | 6.342696  |
| C | 2.257643  | -1.113550 | -5.556299 | C | -3.210094 | 1.622205  | 4.754007  |
| C | 2.483614  | 0.053852  | -6.515792 | O | -3.902243 | 0.387886  | 4.890247  |
| C | 3.663592  | 0.919349  | -6.033262 | C | -4.196712 | 2.748088  | 4.433451  |
| H | 4.240382  | -0.328336 | -3.853636 | O | -4.677839 | 2.506189  | 3.108943  |
| H | 3.950853  | -2.310957 | -6.165775 | C | -3.541287 | 4.137989  | 4.498601  |
| H | 1.863961  | -0.717332 | -4.608501 | O | -2.853534 | 4.306466  | 5.758309  |
| H | 2.758645  | -0.365622 | -7.495199 | C | -4.550697 | 5.267561  | 4.365170  |
| H | 3.940188  | 1.638569  | -6.812106 | O | -5.607499 | 5.065594  | 5.294112  |
| C | 6.010776  | -1.408204 | -4.381994 | C | -6.073059 | 2.494613  | 2.870903  |
| O | 1.336312  | -2.029476 | -6.139686 | C | -6.450350 | 1.149555  | 2.219423  |
| O | 1.368923  | 0.918786  | -6.643286 | O | -5.976614 | 0.112635  | 3.066266  |
| O | 3.260484  | 1.586874  | -4.861859 | C | -5.898149 | 1.062297  | 0.798395  |
| H | 6.018302  | -2.494498 | -4.488489 | O | -6.451570 | -0.091113 | 0.174052  |
| O | 6.371223  | -1.144017 | -3.030716 | C | -6.265636 | 2.322162  | 0.010156  |
| H | 6.746743  | -0.987284 | -5.079672 | O | -5.622832 | 2.219570  | -1.266538 |
| H | 1.353314  | -2.855221 | -5.605337 | C | -5.819185 | 3.583898  | 0.752369  |
| H | 0.526912  | 0.421286  | -6.677222 | O | -6.455729 | 3.575649  | 2.050638  |
| H | 6.426819  | -0.171895 | -2.898770 | C | -6.191502 | 4.894760  | 0.038452  |
| O | 4.813453  | 4.624665  | -3.508997 | O | -7.382397 | 4.820916  | -0.727048 |
| C | 4.628829  | 3.194753  | -3.608697 | C | -6.416394 | 2.246989  | -2.428159 |
| C | 3.579242  | 2.966562  | -4.703819 | C | -5.999093 | 1.086010  | -3.342332 |
| C | 2.255687  | 3.651486  | -4.336080 | O | -6.162207 | -0.103550 | -2.594920 |
| C | 2.481031  | 5.129472  | -4.021054 | C | -4.571951 | 1.296685  | -3.841608 |
| C | 3.660888  | 5.292061  | -3.043449 | O | -4.281357 | 0.312589  | -4.824384 |
| H | 4.238764  | 2.810348  | -2.660328 | C | -4.389936 | 2.700561  | -4.438633 |
| H | 3.949041  | 3.381565  | -5.652049 | O | -2.983875 | 2.859458  | -4.639162 |
| H | 1.861716  | 3.157246  | -3.435633 | C | -4.924632 | 3.787869  | -3.492839 |
| H | 2.755855  | 5.634173  | -4.959449 | O | -6.279117 | 3.476494  | -3.115789 |
| H | 3.936994  | 6.349518  | -2.966436 | C | -4.962315 | 5.176994  | -4.100868 |
| C | 6.009259  | 2.550963  | -3.834019 | O | -5.250627 | 6.087047  | -3.042591 |
| O | 1.334793  | 3.536539  | -5.416355 | C | -2.485771 | 3.247405  | -5.903898 |
| O | 1.365934  | 5.767615  | -3.424141 | C | -1.419242 | 2.227639  | -6.352107 |
| O | 3.258080  | 4.791941  | -1.791280 | O | -2.014101 | 0.941004  | -6.310891 |
| H | 6.017187  | 1.957233  | -4.749909 | C | -0.160667 | 2.338187  | -5.492359 |
| O | 6.369862  | 1.659074  | -2.785134 | O | 0.862029  | 1.547200  | -6.086433 |
| H | 6.744939  | 3.359180  | -3.939560 | C | 0.282615  | 3.800573  | -5.397108 |
| H | 1.351425  | 2.603710  | -5.728197 | O | 1.388706  | 3.840580  | -4.490338 |
| H | 0.524102  | 5.483435  | -3.834239 | C | -0.864958 | 4.690169  | -4.913168 |
| H | 6.425277  | 2.161905  | -1.942749 | O | -1.951078 | 4.551168  | -5.856552 |



|   |          |           |           |   |           |           |           |
|---|----------|-----------|-----------|---|-----------|-----------|-----------|
| O | 4.810768 | 5.629226  | 1.427172  | C | -0.500132 | 6.178423  | -4.799237 |
| C | 4.626520 | 4.815414  | 0.247178  | O | 0.442059  | 6.631275  | -5.754766 |
| C | 3.576432 | 5.528668  | -0.613968 | C | 2.592592  | 4.437550  | -4.915737 |
| C | 2.252869 | 5.667296  | 0.150967  | C | 3.751614  | 3.473699  | -4.621608 |
| C | 2.477980 | 6.342964  | 1.502717  | O | 3.445278  | 2.252015  | -5.270895 |
| C | 3.658302 | 5.680844  | 2.239365  | C | 3.958766  | 3.330616  | -3.116949 |
| H | 4.237103 | 3.834068  | 0.538101  | O | 5.161051  | 2.603379  | -2.897999 |
| H | 3.945660 | 6.528995  | -0.880650 | C | 4.048121  | 4.712404  | -2.460731 |
| H | 1.859756 | 4.654841  | 0.326195  | O | 4.102380  | 4.495878  | -1.046183 |
| H | 2.752262 | 7.391389  | 1.311876  | C | 2.844669  | 5.587767  | -2.824536 |
| H | 3.934179 | 6.280247  | 3.113998  | O | 2.794207  | 5.685481  | -4.272627 |
| C | 6.006969 | 4.591084  | -0.396869 | C | 2.904154  | 7.009250  | -2.237102 |
| O | 1.331246 | 6.439407  | -0.612297 | O | 4.217760  | 7.505439  | -2.049710 |
| O | 1.363076 | 6.273782  | 2.373956  | H | 6.007940  | 5.295978  | -1.009774 |
| O | 3.256209 | 4.389864  | 2.629286  | H | 6.650253  | 4.190523  | 1.070602  |
| H | 6.014535 | 4.937133  | -1.432071 | H | 6.203192  | 1.907107  | 0.214092  |
| O | 6.368336 | 3.215148  | -0.440522 | H | 3.835266  | 3.032806  | 1.140160  |
| H | 6.742400 | 5.177836  | 0.169201  | H | 4.704691  | 2.472831  | 3.327961  |
| H | 1.348237 | 6.101961  | -1.536150 | H | 5.049164  | 5.087567  | 3.029429  |
| H | 0.521114 | 6.416914  | 1.896195  | H | 2.928835  | 5.510596  | 0.859409  |
| H | 6.424183 | 2.870007  | 0.477778  | H | 4.466132  | 7.603649  | 2.432824  |
| O | 4.810329 | 2.395985  | 5.289917  | H | 2.845686  | 7.022386  | 2.902260  |
| C | 4.625618 | 2.811391  | 3.918091  | H | 2.897696  | 8.911509  | 1.390736  |
| C | 3.575041 | 3.928893  | 3.939209  | H | 4.024977  | 5.067272  | 4.870461  |
| C | 2.251816 | 3.416564  | 4.524712  | H | 2.964874  | 3.517122  | 6.395552  |
| C | 2.477492 | 2.780814  | 5.895619  | H | 3.647237  | 1.460724  | 5.166198  |
| C | 3.658251 | 1.792606  | 5.836834  | H | 1.353865  | 2.418135  | 4.059272  |
| H | 4.236351 | 1.972137  | 3.332061  | H | 0.267295  | 1.465887  | 6.012654  |
| H | 3.943879 | 4.761242  | 4.555059  | H | 0.451514  | 4.165626  | 6.400197  |
| H | 1.858878 | 2.648254  | 3.842358  | H | 0.739244  | 4.840982  | 3.436643  |
| H | 2.751489 | 3.583691  | 6.596444  | H | -1.044149 | 6.173184  | 3.984737  |
| H | 3.934503 | 1.482575  | 6.850719  | H | 0.305480  | 7.195615  | 4.491581  |
| C | 6.005878 | 3.175485  | 3.340934  | H | -1.587070 | 5.885989  | 6.053287  |
| O | 1.329793 | 4.494333  | 4.652792  | H | -1.439412 | 3.580114  | 6.987246  |
| O | 1.362966 | 2.055919  | 6.384749  | H | -3.224188 | 1.914630  | 6.875297  |
| O | 3.256537 | 0.682671  | 5.070694  | H | -1.698381 | 0.089804  | 6.182829  |
| H | 6.013191 | 4.200630  | 2.966138  | H | -2.467940 | 1.566860  | 3.944465  |
| O | 6.367259 | 2.351821  | 2.237902  | H | -4.559262 | 0.318993  | 4.158932  |
| H | 6.741457 | 3.098875  | 4.152490  | H | -5.021285 | 2.714203  | 5.153056  |
| H | 1.346341 | 5.006309  | 3.812979  | H | -2.815783 | 4.223485  | 3.679340  |
| H | 0.520756 | 2.518239  | 6.198830  | H | -4.922466 | 5.262249  | 3.333491  |
| H | 6.423563 | 1.418722  | 2.540680  | H | -4.031297 | 6.221020  | 4.546328  |
| O | 4.812377 | -2.639786 | 5.170912  | H | -6.338064 | 5.643948  | 5.043454  |
| C | 4.626866 | -1.308476 | 4.640130  | H | -6.617854 | 2.627761  | 3.810441  |
| C | 3.576040 | -0.628690 | 5.527059  | H | -7.547426 | 1.110668  | 2.154723  |
| C | 2.253173 | -1.406541 | 5.491962  | H | -5.974933 | -0.750237 | 2.606734  |
| C | 2.479728 | -2.874621 | 5.849615  | H | -4.801428 | 0.989762  | 0.847862  |
| C | 3.660721 | -3.444203 | 5.040278  | H | -6.250024 | -0.050472 | -0.789630 |
| H | 4.237557 | -1.374097 | 3.618638  | H | -7.351714 | 2.373418  | -0.120340 |
| H | 3.945096 | -0.590959 | 6.561708  | H | -4.731435 | 3.561208  | 0.899048  |
| H | 1.859923 | -1.352312 | 4.465935  | H | -5.351743 | 5.209980  | -0.589076 |
| H | 2.753895 | -2.921831 | 6.914251  | H | -6.325469 | 5.654377  | 0.818679  |
| H | 3.937496 | -4.430036 | 5.430053  | H | -7.106522 | 4.739142  | -1.654321 |
| C | 6.006651 | -0.629293 | 4.564790  | H | -7.477873 | 2.167323  | -2.175715 |
| O | 1.331095 | -0.835182 | 6.414689  | H | -6.672314 | 1.088652  | -4.212483 |
| O | 1.365615 | -3.709606 | 5.588000  | H | -5.726586 | -0.871368 | -3.019970 |
| O | 3.259010 | -3.537471 | 3.694819  | H | -3.889448 | 1.209327  | -2.983895 |
| H | 6.013298 | 0.303012  | 5.132435  | H | -3.429847 | 0.553025  | -5.259352 |
| O | 6.367870 | -0.280423 | 3.233079  | H | -4.920998 | 2.745661  | -5.399975 |
| H | 6.742694 | -1.310959 | 5.011054  | H | -4.290892 | 3.812654  | -2.598521 |
| H | 1.347101 | 0.140626  | 6.291311  | H | -5.742188 | 5.200943  | -4.876477 |
| H | 0.523219 | -3.276507 | 5.833831  | H | -3.994886 | 5.392736  | -4.572322 |
| H | 6.424372 | -1.098902 | 2.692322  | H | -5.442943 | 6.951875  | -3.424913 |
| O | 4.815411 | -5.686520 | 1.159417  | H | -3.297275 | 3.281696  | -6.639135 |
| C | 4.629350 | -4.441620 | 1.869419  | H | -1.138883 | 2.481988  | -7.384790 |
| C | 3.578900 | -4.711782 | 2.954079  | H | -1.338488 | 0.233518  | -6.356484 |
| C | 2.256143 | -5.169974 | 2.324253  | H | -0.391434 | 1.978548  | -4.478274 |
| C | 2.483153 | -6.364885 | 1.399437  | H | 1.724130  | 1.800494  | -5.683012 |
| C | 3.663815 | -6.086648 | 0.449274  | H | 0.593167  | 4.154620  | -6.386338 |
| H | 4.239554 | -3.684018 | 1.181382  | H | -1.212048 | 4.345334  | -3.930756 |
| H | 3.948496 | -5.496987 | 3.628582  | H | -0.144065 | 6.363414  | -3.778152 |
| H | 1.862414 | -4.334153 | 1.727020  | H | -1.425461 | 6.750327  | -4.932198 |

|   |          |           |           |   |          |          |           |
|---|----------|-----------|-----------|---|----------|----------|-----------|
| H | 2.757859 | -7.226489 | 2.026353  | H | 1.311179 | 6.606485 | -5.322265 |
| H | 3.941079 | -7.005919 | -0.078415 | H | 2.554486 | 4.659229 | -5.986614 |
| C | 6.008994 | -3.958557 | 2.353229  | H | 4.665691 | 3.913212 | -5.047049 |
| O | 1.334403 | -5.535641 | 3.346424  | H | 4.006359 | 1.518497 | -4.947108 |
| O | 1.369090 | -6.681625 | 0.583677  | H | 3.095980 | 2.798528 | -2.689713 |
| H | 6.015782 | -3.821227 | 3.436069  | H | 5.380498 | 2.644530 | -1.937647 |
| O | 6.369349 | -2.699580 | 1.795775  | H | 4.955231 | 5.224187 | -2.798870 |
| H | 6.745399 | -4.732032 | 2.098226  | H | 1.921494 | 5.102671 | -2.484481 |
| H | 1.350167 | -4.830787 | 4.032449  | H | 2.350629 | 7.024729 | -1.292796 |
| H | 0.526741 | -6.603995 | 1.075648  | H | 2.378312 | 7.669631 | -2.938351 |
| H | 6.425942 | -2.786983 | 0.818698  | H | 4.411428 | 7.417496 | -1.102211 |

| MIA S WATER |               |           |           |
|-------------|---------------|-----------|-----------|
| E           | -807.48797877 |           |           |
| ZPE         | -807.143659   |           |           |
| H           | -807.127101   |           |           |
| G           | -807.185831   |           |           |
| S           | 123.609       |           |           |
| Atom        | x [Å]         | y [Å]     | z [Å]     |
| C           | -1.217403     | 3.907627  | -0.107994 |
| C           | -0.259666     | 3.721000  | -1.104646 |
| C           | 0.389088      | 2.491685  | -1.210131 |
| C           | 0.110086      | 1.431676  | -0.334004 |
| C           | -0.872074     | 1.616337  | 0.658245  |
| C           | -1.521265     | 2.854480  | 0.753867  |
| C           | -1.312635     | 0.466500  | 1.544650  |
| C           | -1.841387     | -0.662730 | 0.691957  |
| C           | -3.198144     | -0.982240 | 0.635361  |
| C           | -3.660966     | -2.031592 | -0.164550 |
| C           | -2.750337     | -2.764438 | -0.923919 |
| C           | -1.389680     | -2.448077 | -0.890535 |
| C           | -0.919642     | -1.396559 | -0.088672 |
| C           | 0.979778      | 0.185765  | -0.490831 |
| N           | 0.459977      | -1.090304 | 0.052913  |
| C           | 2.357445      | 0.456142  | 0.153660  |
| C           | 1.397122      | -2.181377 | -0.227230 |
| C           | 2.751523      | -1.892674 | 0.411969  |
| N           | 3.292079      | -0.636363 | -0.099135 |
| C           | 4.613380      | -0.350120 | 0.446711  |
| H           | -1.734618     | 4.857615  | -0.010677 |
| H           | -0.020869     | 4.521686  | -1.798181 |
| H           | 1.133694      | 2.348325  | -1.989606 |
| H           | -2.284340     | 2.986507  | 1.516594  |
| H           | -2.082514     | 0.811194  | 2.240189  |
| H           | -0.464589     | 0.098535  | 2.135334  |
| H           | -3.899127     | -0.412143 | 1.239997  |
| H           | -4.719097     | -2.274260 | -0.187477 |
| H           | -3.093342     | -3.582421 | -1.551111 |
| H           | -0.695863     | -3.022284 | -1.494744 |
| H           | 1.159009      | 0.055461  | -1.573476 |
| H           | 2.205537      | 0.633137  | 1.236789  |
| H           | 2.772299      | 1.374171  | -0.273945 |
| H           | 1.541717      | -2.333278 | -1.311257 |
| H           | 0.989413      | -3.105133 | 0.190897  |
| H           | 3.446443      | -2.704131 | 0.168015  |
| H           | 2.634664      | -1.871715 | 1.513095  |
| H           | 4.612185      | -0.229619 | 1.546160  |
| H           | 5.004389      | 0.572544  | 0.006242  |
| H           | 5.299277      | -1.165956 | 0.197284  |

| β-CD WATER |                |           |           |          |                |           |           |
|------------|----------------|-----------|-----------|----------|----------------|-----------|-----------|
| β-CD-CCCW  |                |           |           | β-CD-EXP |                |           |           |
| E          | -4275.44518493 |           |           | E        | -4275.42677403 |           |           |
| ZPE        | -4274.226515   |           |           | ZPE      | -4274.212074   |           |           |
| H          | -4274.152344   |           |           | H        | -4274.135256   |           |           |
| G          | -4274.330395   |           |           | G        | -4274.322392   |           |           |
| S          | 374.741        |           |           | S        | 393.862        |           |           |
| Atom       | x [Å]          | y [Å]     | z [Å]     | Atom     | x [Å]          | y [Å]     | z [Å]     |
| O          | 1.970660       | -5.446896 | 1.204542  | C        | -0.111387      | -6.047638 | -0.275500 |
| C          | 0.706586       | -4.772415 | 1.006590  | C        | -0.944218      | -6.093753 | -1.559652 |
| C          | -0.076459      | -5.587552 | -0.033635 | O        | -0.067020      | -5.982068 | -2.677342 |
| C          | 0.714998       | -5.658629 | -1.343198 | C        | -1.996658      | -4.990191 | -1.559516 |
| C          | 2.117649       | -6.201973 | -1.093608 | O        | -2.808777      | -5.185738 | -2.703934 |
| C          | 2.797151       | -5.443102 | 0.055606  | C        | -2.817482      | -4.989428 | -0.261232 |
| H          | 0.888284       | -3.771024 | 0.600367  | O        | -3.559784      | -3.765545 | -0.286563 |
| H          | -0.247994      | -6.602285 | 0.349302  | C        | -1.883106      | -5.031141 | 0.959685  |
| H          | 0.804694       | -4.632745 | -1.732537 | O        | -0.977518      | -6.141236 | 0.837602  |

|   |           |           |           |   |           |           |           |
|---|-----------|-----------|-----------|---|-----------|-----------|-----------|
| H | 2.028622  | -7.253417 | -0.784949 | C | -2.575856 | -5.198142 | 2.297500  |
| H | 3.719894  | -5.951167 | 0.353230  | O | -1.578740 | -5.008629 | 3.307238  |
| C | 0.045665  | -4.604171 | 2.385766  | C | -4.942420 | -3.761570 | -0.006491 |
| O | -1.319382 | -4.973459 | -0.375106 | C | -5.693876 | -3.170821 | -1.209604 |
| O | 0.084433  | -6.501385 | -2.294413 | O | -5.368696 | -3.922281 | -2.378281 |
| O | 2.946511  | -6.098198 | -2.248095 | C | -5.354165 | -1.695611 | -1.389269 |
| O | 3.067324  | -4.132157 | -0.374171 | O | -6.181205 | -1.200317 | -2.429700 |
| H | -0.959669 | -5.027341 | 2.387995  | C | -5.564362 | -0.949853 | -0.073309 |
| O | -0.105609 | -3.235382 | 2.759466  | O | -5.120833 | 0.397137  | -0.273883 |
| H | 0.651256  | -5.149487 | 3.121089  | C | -4.775740 | -1.620201 | 1.056925  |
| H | -0.840582 | -6.202619 | -2.385664 | O | -5.218060 | -2.995893 | 1.151353  |
| H | 2.432913  | -6.443986 | -2.993205 | C | -4.957164 | -0.950061 | 2.425608  |
| H | 0.778150  | -2.805304 | 2.781604  | O | -6.252241 | -0.408658 | 2.655337  |
| O | 5.489756  | -1.856269 | 1.205619  | C | -6.045291 | 1.440242  | -0.091870 |
| C | 4.173833  | -2.422840 | 1.007177  | C | -5.935144 | 2.414789  | -1.265879 |
| C | 4.322504  | -3.543547 | -0.032813 | O | -6.195557 | 1.700483  | -2.472270 |
| C | 4.871823  | -2.969310 | -1.342418 | C | -4.560815 | 3.069509  | -1.287326 |
| C | 6.171535  | -2.212061 | -1.092700 | O | -4.568652 | 4.023836  | -2.335619 |
| C | 6.002407  | -1.207790 | 0.056733  | C | -4.250648 | 3.702913  | 0.068668  |
| H | 3.505358  | -1.655737 | 0.600382  | O | -2.867208 | 4.067580  | 0.022153  |
| H | 5.008767  | -4.310443 | 0.350180  | C | -4.488056 | 2.719934  | 1.230834  |
| H | 4.126106  | -2.259103 | -1.731792 | O | -5.807850 | 2.128114  | 1.129804  |
| H | 6.937759  | -2.937592 | -0.784208 | C | -4.379773 | 3.377258  | 2.596501  |
| H | 6.975265  | -0.803739 | 0.354331  | O | -5.242397 | 4.510066  | 2.642445  |
| C | 3.628835  | -2.833849 | 2.386068  | C | -2.464777 | 5.342172  | 0.483309  |
| O | 5.137117  | -3.987829 | -2.293666 | C | -1.838778 | 6.122951  | -0.683140 |
| O | 6.607499  | -1.499076 | -2.246935 | O | -2.768933 | 6.184081  | -1.764254 |
| O | 5.146068  | -0.179033 | -0.372834 | C | -0.532304 | 5.473386  | -1.121766 |
| H | 3.333214  | -3.883755 | 2.388716  | O | 0.033925  | 6.304749  | -2.125457 |
| O | 2.463549  | -2.098995 | 2.757890  | C | 0.392529  | 5.291685  | 0.081875  |
| H | 4.431883  | -2.699497 | 3.122184  | O | 1.562691  | 4.602130  | -0.368059 |
| H | 4.326817  | -4.524885 | -2.384373 | C | -0.324854 | 4.491300  | 1.174717  |
| H | 6.557283  | -2.115769 | -2.992375 | O | -1.526729 | 5.217579  | 1.532795  |
| H | 2.678063  | -1.139868 | 2.780624  | C | 0.495638  | 4.263527  | 2.445293  |
| O | 4.874003  | 3.134368  | 1.205455  | O | 1.244336  | 5.397858  | 2.855328  |
| C | 4.498055  | 1.751703  | 1.008090  | C | 2.746823  | 5.356302  | -0.473313 |
| C | 5.467866  | 1.169389  | -0.031258 | C | 3.477542  | 4.977294  | -1.764245 |
| C | 5.361495  | 1.956118  | -1.341287 | O | 2.600531  | 5.191428  | -2.866903 |
| C | 5.577982  | 3.444812  | -1.092649 | C | 3.962714  | 3.532821  | -1.705756 |
| C | 4.686222  | 3.938540  | 0.055996  | O | 4.735632  | 3.306953  | -2.871142 |
| H | 3.481726  | 1.705664  | 0.600976  | C | 4.755123  | 3.256656  | -0.418771 |
| H | 6.495161  | 1.228464  | 0.352109  | O | 4.923388  | 1.835979  | -0.364340 |
| H | 4.341727  | 1.814419  | -1.731200 | C | 3.964882  | 3.749038  | 0.805224  |
| H | 6.622658  | 3.592868  | -0.783808 | O | 3.605716  | 5.129929  | 0.625889  |
| H | 4.975599  | 4.951583  | 0.353044  | C | 4.704785  | 3.676001  | 2.125848  |
| C | 4.479550  | 1.070987  | 2.387825  | O | 3.746437  | 3.955532  | 3.152321  |
| O | 6.324265  | 1.528750  | -2.291573 | C | 6.205847  | 1.276901  | -0.178720 |
| O | 5.292148  | 4.228689  | -2.247845 | C | 6.504812  | 0.313771  | -1.334442 |
| O | 3.348160  | 3.909010  | -0.374034 | O | 6.430891  | 1.026509  | -2.569458 |
| H | 5.116180  | 0.185278  | 2.392013  | C | 5.533837  | -0.860098 | -1.319261 |
| O | 3.178413  | 0.618627  | 2.760071  | O | 5.942482  | -1.752728 | -2.343478 |
| H | 4.875040  | 1.783594  | 3.123069  | C | 5.514753  | -1.525407 | 0.055153  |
| H | 6.238921  | 0.560413  | -2.382503 | O | 4.418141  | -2.446577 | 0.030632  |
| H | 5.743940  | 3.804459  | -2.992463 | C | 5.316939  | -0.491810 | 1.178411  |
| H | 2.562149  | 1.384281  | 2.781787  | O | 6.281656  | 0.575260  | 1.045400  |
| O | 0.588278  | 5.762768  | 1.203977  | C | 5.470483  | -1.085533 | 2.568412  |
| C | 1.434452  | 4.606468  | 1.006816  | O | 6.716176  | -1.773870 | 2.654490  |
| C | 2.493920  | 5.001019  | -0.033163 | C | 4.599003  | -3.752769 | 0.538332  |
| C | 1.811720  | 5.406948  | -1.343263 | C | 4.361827  | -4.768276 | -0.590934 |
| C | 0.783088  | 6.504796  | -1.095109 | O | 5.219431  | -4.460503 | -1.689866 |
| C | -0.158038 | 6.116925  | 0.054747  | C | 2.899658  | -4.763717 | -1.019221 |
| H | 0.836347  | 3.783147  | 0.600405  | O | 2.740925  | -5.796724 | -1.981771 |
| H | 3.088147  | 5.841444  | 0.349475  | C | 1.995345  | -4.951880 | 0.199133  |
| H | 1.286203  | 4.520874  | -1.731593 | O | 0.639554  | -4.857293 | -0.248886 |
| H | 1.318949  | 7.414215  | -0.787872 | C | 2.304653  | -3.875559 | 1.246061  |
| H | -0.768859 | 6.975358  | 0.351735  | O | 3.702944  | -4.003627 | 1.602545  |
| C | 1.956085  | 4.168298  | 2.386368  | C | 1.473433  | -3.964101 | 2.526304  |
| O | 2.745523  | 5.891871  | -2.294796 | O | 1.288465  | -5.290133 | 2.998306  |
| O | -0.009101 | 6.768787  | -2.249848 | H | 0.544454  | -6.921100 | -0.215747 |
| O | -0.970195 | 5.052552  | -0.373851 | H | -1.458862 | -7.064751 | -1.579583 |
| H | 3.045415  | 4.113065  | 2.389134  | H | -0.618028 | -5.841103 | -3.461339 |
| O | 1.498092  | 2.869608  | 2.760271  | H | -1.474737 | -4.022236 | -1.609953 |

|   |           |           |           |   |           |           |           |
|---|-----------|-----------|-----------|---|-----------|-----------|-----------|
| H | 1.646917  | 4.922679  | 3.121309  | H | -3.577440 | -4.583282 | -2.640567 |
| H | 3.449700  | 5.221570  | -2.384679 | H | -3.496294 | -5.852204 | -0.256438 |
| H | 0.603476  | 6.857822  | -2.995064 | H | -1.315071 | -4.093409 | 0.979375  |
| H | 0.515235  | 2.865490  | 2.781948  | H | -3.015962 | -6.202187 | 2.359568  |
| O | -4.140796 | 4.054053  | 1.205486  | H | -3.376272 | -4.454476 | 2.391401  |
| C | -2.709241 | 3.993703  | 1.008001  | H | -1.957853 | -5.242627 | 4.164674  |
| C | -2.356486 | 5.067114  | -0.032735 | H | -5.298190 | -4.773824 | 0.209717  |
| C | -3.099930 | 4.786949  | -1.342420 | H | -6.769669 | -3.255944 | -1.002028 |
| C | -4.599565 | 4.669019  | -1.093360 | H | -5.718911 | -3.417233 | -3.128733 |
| C | -4.883336 | 3.691392  | 0.056422  | H | -4.291565 | -1.612189 | -1.662969 |
| H | -2.439138 | 3.012302  | 0.602206  | H | -6.008294 | -0.243114 | -2.528682 |
| H | -2.642324 | 6.056212  | 0.349089  | H | -6.627169 | -0.959711 | 0.192693  |
| H | -2.736046 | 3.823149  | -1.730659 | H | -3.706144 | -1.614750 | 0.815623  |
| H | -4.975122 | 5.655365  | -0.785569 | H | -4.186421 | -0.178754 | 2.534659  |
| H | -5.935299 | 3.748997  | 0.353569  | H | -4.769248 | -1.709356 | 3.191945  |
| C | -2.041164 | 4.128381  | 2.387444  | H | -6.231353 | 0.511300  | 2.341703  |
| O | -2.896411 | 5.818759  | -2.294539 | H | -7.064497 | 1.050043  | -0.013879 |
| O | -5.301005 | 4.215459  | -2.247874 | H | -6.694249 | 3.196070  | -1.121766 |
| O | -4.557569 | 2.392872  | -0.372210 | H | -5.914474 | 2.274312  | -3.201062 |
| H | -1.320161 | 4.946839  | 2.390895  | H | -3.808111 | 2.288714  | -1.474387 |
| O | -1.309407 | 2.961391  | 2.760033  | H | -3.806715 | 4.625430  | -2.210251 |
| H | -2.823948 | 4.354961  | 3.122783  | H | -4.878101 | 4.589382  | 0.206947  |
| H | -1.933219 | 5.950224  | -2.385357 | H | -3.733887 | 1.926131  | 1.170997  |
| H | -4.987310 | 4.748828  | -2.993295 | H | -3.332132 | 3.665567  | 2.748800  |
| H | -1.918094 | 2.189729  | 2.782213  | H | -4.647111 | 2.637916  | 3.364684  |
| O | -5.750695 | -0.709242 | 1.207621  | H | -5.078290 | 4.969607  | 3.476241  |
| C | -4.811846 | 0.372925  | 1.009175  | H | -3.316919 | 5.881966  | 0.906650  |
| C | -5.432995 | 1.318114  | -0.030281 | H | -1.621173 | 7.139058  | -0.324879 |
| C | -5.679564 | 0.562670  | -1.339840 | H | -2.263372 | 6.507943  | -2.526854 |
| C | -6.521434 | -0.683792 | -1.090014 | H | -0.758258 | 4.477713  | -1.530562 |
| C | -5.931679 | -1.515358 | 0.058445  | H | 0.803846  | 5.838579  | -2.505102 |
| H | -3.876526 | -0.027138 | 0.601855  | H | 0.668470  | 6.265002  | 0.501264  |
| H | -6.383643 | 1.711640  | 0.353468  | H | -0.615672 | 3.507467  | 0.785566  |
| H | -4.699639 | 0.246626  | -1.729610 | H | 1.154167  | 3.406031  | 2.276154  |
| H | -7.526529 | -0.363164 | -0.780692 | H | -0.211863 | 3.978333  | 3.236560  |
| H | -6.631748 | -2.302398 | 0.356220  | H | 2.182366  | 5.136015  | 2.825850  |
| C | -4.499021 | 0.979539  | 2.388092  | H | 2.526034  | 6.427588  | -0.461997 |
| O | -6.360899 | 1.365414  | -2.290612 | H | 4.354727  | 5.634623  | -1.846897 |
| O | -6.605221 | -1.514736 | -2.244651 | H | 3.011727  | 4.781816  | -3.642465 |
| O | -4.713759 | -2.069485 | -0.372760 | H | 3.079468  | 2.876040  | -1.687375 |
| H | -4.687304 | 2.053922  | 2.390574  | H | 5.150593  | 2.423184  | -2.799539 |
| O | -3.130607 | 0.821844  | 2.760474  | H | 5.730134  | 3.758076  | -0.473844 |
| H | -5.164930 | 0.510759  | 3.124045  | H | 3.056360  | 3.140044  | 0.885304  |
| H | -5.862606 | 2.199976  | -2.382889 | H | 5.517474  | 4.414308  | 2.131571  |
| H | -6.828820 | -0.937031 | -2.989496 | H | 5.136315  | 2.675820  | 2.250979  |
| H | -2.908616 | -0.135596 | 2.782733  | H | 4.213827  | 4.059927  | 3.991511  |
| O | -3.031197 | -4.937870 | 1.203559  | H | 6.966476  | 2.062224  | -0.123532 |
| C | -3.292001 | -3.528847 | 1.006927  | H | 7.523808  | -0.070631 | -1.189805 |
| C | -4.417971 | -3.424234 | -0.032770 | H | 6.442858  | 0.356902  | -3.270819 |
| C | -3.980077 | -4.085645 | -1.343192 | H | 4.522776  | -0.473864 | -1.519392 |
| C | -3.529533 | -5.521124 | -1.095406 | H | 5.505245  | -2.614975 | -2.191424 |
| C | -2.512679 | -5.580303 | 0.053897  | H | 6.458072  | -2.057927 | 0.214091  |
| H | -2.395931 | -3.046473 | 0.600516  | H | 4.305158  | -0.075641 | 1.098837  |
| H | -5.317952 | -3.923866 | 0.349559  | H | 4.627602  | -1.766702 | 2.739602  |
| H | -3.122437 | -3.515325 | -1.732091 | H | 5.410886  | -0.270788 | 3.303392  |
| H | -4.406772 | -6.108005 | -0.787630 | H | 6.740676  | -2.227549 | 3.507074  |
| H | -2.334479 | -6.618813 | 0.350414  | H | 5.601645  | -3.862425 | 0.961771  |
| C | -3.571315 | -2.907926 | 2.386752  | H | 4.606876  | -5.765430 | -0.198634 |
| O | -5.032361 | -4.117401 | -2.294158 | H | 4.898565  | -4.997588 | -2.431758 |
| O | -2.930875 | -6.102516 | -2.250504 | H | 2.670279  | -3.784606 | -1.464947 |
| H | -4.529367 | -2.386529 | 2.390616  | H | 1.836925  | -5.734133 | -2.346563 |
| O | -2.595770 | -1.935584 | 2.759561  | H | 2.171517  | -5.930817 | 0.657295  |
| H | -3.618308 | -3.721767 | 3.121779  | H | 2.144674  | -2.879535 | 0.814193  |
| H | -5.376585 | -3.208122 | -2.383540 | H | 0.508811  | -3.481818 | 2.341051  |
| H | -3.521500 | -5.916545 | -2.995545 | H | 1.994148  | -3.366056 | 3.287543  |
| H | -1.708395 | -2.358159 | 2.781826  | H | 0.327865  | -5.452805 | 2.991567  |

| Complexes 1:1 WATER         |                |           |           |                            |                |           |           |
|-----------------------------|----------------|-----------|-----------|----------------------------|----------------|-----------|-----------|
| [MIA S]-[ $\beta$ -CD-CCCW] |                |           |           | [MIA S]-[ $\beta$ -CD-EXP] |                |           |           |
| CR1                         |                |           |           | CR1                        |                |           |           |
| E                           | -5082.95164526 |           |           | E                          | -5082.92868737 |           |           |
| Atom                        | x [Å]          | y [Å]     | z [Å]     | Atom                       | x [Å]          | y [Å]     | z [Å]     |
| O                           | 6.644907       | 2.185138  | 0.057069  | C                          | -6.124933      | 2.554255  | 0.192631  |
| C                           | 5.320884       | 2.666426  | -0.270494 | C                          | -6.439330      | 1.874098  | 1.527910  |
| C                           | 5.007830       | 3.812555  | 0.703230  | O                          | -5.898690      | 2.658102  | 2.588839  |
| C                           | 5.062999       | 3.300909  | 2.146084  | C                          | -5.881514      | 0.455800  | 1.546672  |
| C                           | 6.402485       | 2.628969  | 2.427095  | O                          | -6.313704      | -0.143380 | 2.755314  |
| C                           | 6.727305       | 1.593793  | 1.340363  | C                          | -6.316425      | -0.344999 | 0.310045  |
| H                           | 4.591950       | 1.864216  | -0.109810 | O                          | -5.499958      | -1.521638 | 0.312778  |
| H                           | 5.741016       | 4.618980  | 0.569204  | C                          | -6.064830      | 0.469274  | -0.970763 |
| H                           | 4.267356       | 2.548843  | 2.261582  | O                          | -6.666451      | 1.770612  | -0.852589 |
| H                           | 7.187251       | 3.398207  | 2.393054  | C                          | -6.628743      | -0.136088 | -2.240794 |
| H                           | 7.760905       | 1.247842  | 1.441265  | O                          | -6.141306      | 0.658930  | -3.325177 |
| C                           | 5.307884       | 3.015764  | -1.768767 | C                          | -6.078202      | -2.802417 | 0.197088  |
| O                           | 3.683189       | 4.316746  | 0.531719  | C                          | -5.679790      | -3.641921 | 1.421050  |
| O                           | 4.897160       | 4.352266  | 3.084091  | O                          | -6.106809      | -2.979309 | 2.610209  |
| O                           | 6.416724       | 1.968973  | 3.689982  | C                          | -4.174515      | -3.881961 | 1.435550  |
| O                           | 5.828406       | 0.520412  | 1.465660  | O                          | -3.899991      | -4.750421 | 2.523694  |
| H                           | 4.971853       | 4.041798  | -1.924152 | C                          | -3.735889      | -4.470226 | 0.096774  |
| O                           | 4.413374       | 2.193898  | -2.517391 | O                          | -2.306238      | -4.577396 | 0.111526  |
| H                           | 6.334720       | 2.927949  | -2.146663 | C                          | -4.197132      | -3.585463 | -1.066523 |
| H                           | 4.079006       | 4.830370  | 2.848969  | O                          | -5.635564      | -3.447999 | -0.982788 |
| H                           | 6.058458       | 2.595086  | 4.336649  | C                          | -3.837246      | -4.149001 | -2.447763 |
| H                           | 4.676254       | 1.251812  | -2.417761 | O                          | -3.907615      | -5.565679 | -2.548437 |
| O                           | 6.335773       | -2.834010 | 0.039922  | C                          | -1.749398      | -5.867948 | 0.046663  |
| C                           | 5.845315       | -1.473459 | 0.024152  | C                          | -0.622026      | -5.992162 | 1.075309  |
| C                           | 6.324067       | -0.810991 | 1.324758  | O                          | -1.150512      | -5.658817 | 2.357814  |
| C                           | 5.775524       | -1.576535 | 2.532860  | C                          | 0.563735       | -5.108906 | 0.710947  |
| C                           | 6.143486       | -3.053532 | 2.445749  | O                          | 1.600351       | -5.401181 | 1.636116  |
| C                           | 5.771796       | -3.624478 | 1.069513  | O                          | 0.996272       | -5.353448 | -0.733672 |
| H                           | 4.749540       | -1.481422 | 0.019488  | O                          | 1.943134       | -4.322195 | -1.030828 |
| H                           | 7.421752       | -0.811925 | 1.354184  | C                          | -0.197982      | -5.266627 | -1.700510 |
| H                           | 4.678165       | -1.491080 | 2.508756  | O                          | -1.258060      | -6.150822 | -1.256795 |
| H                           | 7.233837       | -3.143060 | 2.554481  | C                          | 0.154674       | -5.647304 | -3.128389 |
| H                           | 6.200725       | -4.623704 | 0.943896  | O                          | 0.793052       | -6.920894 | -3.132087 |
| C                           | 6.313671       | -0.823514 | -1.289267 | C                          | 3.120217       | -4.645852 | -1.744381 |
| O                           | 6.290016       | -1.070437 | 3.754238  | C                          | 4.343102       | -4.370352 | -0.854574 |
| O                           | 5.485451       | -3.829710 | 3.443369  | O                          | 4.195747       | -5.073772 | 0.379944  |
| O                           | 4.370233       | -3.668687 | 0.968725  | C                          | 4.517164       | -2.877487 | -0.606193 |
| H                           | 6.853638       | 0.103340  | -1.091420 | O                          | 5.758019       | -2.713280 | 0.063509  |
| O                           | 5.228719       | -0.467785 | -2.145136 | C                          | 4.466503       | -2.097952 | -1.917208 |
| H                           | 6.997756       | -1.521894 | -1.788427 | O                          | 4.484503       | -0.707852 | -1.574620 |
| H                           | 6.128182       | -0.107659 | 3.765789  | C                          | 3.200965       | -2.446826 | -2.705471 |
| H                           | 5.604051       | -3.363035 | 4.284047  | O                          | 3.206940       | -3.878663 | -2.929275 |
| H                           | 4.705947       | -1.271833 | -2.360836 | C                          | 3.093904       | -1.739888 | -4.065693 |
| O                           | 2.511531       | -5.735124 | -1.443264 | O                          | 4.342584       | -1.486554 | -4.698830 |
| C                           | 3.155440       | -4.519385 | -0.996516 | C                          | 5.561828       | 0.078145  | -2.013787 |
| C                           | 3.761953       | -4.819414 | 0.382547  | C                          | 6.053603       | 0.947143  | -0.854485 |
| C                           | 2.655550       | -5.235334 | 1.356962  | O                          | 6.466655       | 0.104435  | 0.218079  |
| C                           | 1.855632       | -6.404323 | 0.792477  | C                          | 4.948700       | 1.899110  | -0.415462 |
| C                           | 1.404892       | -6.112167 | -0.646216 | O                          | 5.480954       | 2.716021  | 0.613618  |
| H                           | 2.403870       | -3.729975 | -0.883342 | C                          | 4.425009       | 2.719686  | -1.601508 |
| H                           | 4.496499       | -5.630447 | 0.290796  | O                          | 3.227484       | 3.381800  | -1.177785 |
| H                           | 1.977905       | -4.375766 | 1.475854  | C                          | 4.077957       | 1.806704  | -2.791609 |
| H                           | 2.513684       | -7.284334 | 0.757512  | O                          | 5.177770       | 0.918913  | -3.090364 |
| H                           | 1.002221       | -7.018634 | -1.109201 | C                          | 3.784865       | 2.561027  | -4.073847 |
| C                           | 4.134237       | -4.077085 | -2.098187 | O                          | 3.248294       | 1.624311  | -5.003978 |
| O                           | 3.182214       | -5.634750 | 2.612147  | C                          | 3.255764       | 4.777208  | -0.955428 |
| O                           | 0.697431       | -6.688783 | 1.572542  | C                          | 2.674919       | 5.088852  | 0.439884  |
| O                           | 0.431973       | -5.097363 | -0.611539 | O                          | 3.428531       | 4.359773  | 1.398667  |
| H                           | 5.139947       | -3.949911 | -1.695554 | C                          | 1.175799       | 4.790295  | 0.480561  |
| O                           | 3.782361       | -2.819460 | -2.673373 | O                          | 0.646709       | 5.301673  | 1.694992  |
| H                           | 4.164987       | -4.865482 | -2.861231 | C                          | 0.448993       | 5.402444  | -0.719101 |
| H                           | 3.768957       | -4.920546 | 2.926619  | O                          | -0.869213      | 4.840660  | -0.681769 |
| H                           | 0.983023       | -6.717367 | 2.497821  | C                          | 1.148122       | 5.068366  | -2.043247 |
| H                           | 2.884431       | -2.881944 | -3.068165 | O                          | 2.531909       | 5.462122  | -1.957735 |
| O                           | -1.938247      | -4.377755 | -3.335573 | C                          | 0.531962       | 5.760430  | -3.247482 |
| C                           | -0.700225      | -4.205085 | -2.608029 | O                          | 0.424116       | 7.159207  | -2.991006 |

|   |           |           |           |   |           |           |           |
|---|-----------|-----------|-----------|---|-----------|-----------|-----------|
| C | -0.713914 | -5.220027 | -1.453637 | C | -1.978033 | 5.660930  | -1.003950 |
| C | -1.917672 | -4.948559 | -0.545459 | C | -2.820180 | 5.903188  | 0.258389  |
| C | -3.208189 | -4.968795 | -1.357303 | O | -1.978502 | 6.439599  | 1.279999  |
| C | -3.086585 | -4.045739 | -2.578946 | C | -3.485510 | 4.615233  | 0.726416  |
| H | -0.666426 | -3.195802 | -2.182810 | O | -4.343226 | 4.956241  | 1.805223  |
| H | -0.777326 | -6.237994 | -1.860557 | C | -4.230700 | 3.945744  | -0.428059 |
| H | -1.791087 | -3.942401 | -0.118793 | O | -4.731825 | 2.697777  | 0.061239  |
| H | -3.372494 | -5.990883 | -1.725767 | C | -3.274935 | 3.733375  | -1.607815 |
| H | -3.938008 | -4.188372 | -3.251929 | O | -2.768453 | 5.035865  | -1.993623 |
| C | 0.454398  | -4.323646 | -3.617520 | C | -3.900157 | 3.071402  | -2.838632 |
| O | -2.031820 | -5.915032 | 0.488712  | O | -5.235691 | 3.478169  | -3.102392 |
| O | -4.332524 | -4.537052 | -0.594288 | H | -6.624892 | 3.525188  | 0.127288  |
| O | -3.028870 | -2.719893 | -2.117937 | H | -7.533368 | 1.822538  | 1.619628  |
| H | 1.172444  | -5.080269 | -3.298830 | H | -5.906822 | 2.101684  | 3.382276  |
| O | 1.195624  | -3.111013 | -3.747737 | H | -4.783471 | 0.522559  | 1.513302  |
| H | 0.031561  | -4.633205 | -4.581966 | H | -6.054034 | -1.087284 | 2.740198  |
| H | -1.163245 | -5.978959 | 0.931142  | H | -7.377718 | -0.611282 | 0.398330  |
| H | -4.360750 | -5.073627 | 0.211129  | H | -4.980271 | 0.577020  | -1.090268 |
| H | 0.591520  | -2.391292 | -4.035981 | H | -7.726096 | -0.119981 | -2.198529 |
| O | -3.728713 | 0.268828  | -4.132852 | H | -6.295362 | -1.177403 | -2.329179 |
| C | -2.866671 | -0.742807 | -3.566773 | H | -6.591399 | 0.384566  | -4.134954 |
| C | -3.776216 | -1.709381 | -2.799070 | H | -7.167262 | -2.732422 | 0.113316  |
| C | -4.534910 | -0.967215 | -1.691203 | H | -6.187951 | -4.612624 | 1.336848  |
| C | -5.270199 | 0.258665  | -2.234371 | H | -5.664978 | -3.435535 | 3.343743  |
| C | -4.340830 | 1.080658  | -3.148353 | H | -3.669308 | -2.914799 | 1.573426  |
| H | -2.174584 | -0.275706 | -2.857584 | H | -2.935369 | -4.900992 | 2.558359  |
| H | -4.491735 | -2.169931 | -3.493218 | H | -4.183401 | -5.462016 | -0.030868 |
| H | -3.787428 | -0.620965 | -0.961273 | H | -3.747806 | -2.588926 | -0.978974 |
| H | -6.103255 | -0.100693 | -2.857792 | H | -2.839056 | -3.784796 | -2.716869 |
| H | -4.923061 | 1.826548  | -3.698606 | H | -4.543737 | -3.728597 | -3.170791 |
| C | -2.025561 | -1.344411 | -4.705841 | H | -3.045258 | -5.915295 | -2.265505 |
| O | -5.478790 | -1.830421 | -1.070592 | H | -2.514010 | -6.626751 | 0.237148  |
| O | -5.738436 | 1.133076  | -1.223969 | H | -0.288182 | -7.039101 | 1.067943  |
| O | -3.367930 | 1.703549  | -2.344768 | H | -0.401656 | -5.612604 | 2.970435  |
| H | -2.142686 | -2.428242 | -4.745419 | H | 0.256232  | -4.056797 | 0.792169  |
| O | -0.627300 | -1.109351 | -4.538807 | H | 2.442535  | -5.066509 | 1.267898  |
| H | -2.385698 | -0.923534 | -5.653509 | H | 1.462461  | -6.340560 | -0.816671 |
| H | -5.020975 | -2.663822 | -0.846983 | H | -0.568689 | -4.234466 | -1.703591 |
| H | -6.272401 | 0.660636  | -0.521596 | H | 0.813569  | -4.868351 | -3.531714 |
| H | -0.462887 | -0.141035 | -4.505428 | H | -0.768209 | -5.659441 | -3.725493 |
| O | -1.412936 | 4.681810  | -3.239615 | H | 1.091332  | -7.096364 | -4.034176 |
| C | -1.638661 | 3.258812  | -3.115685 | H | 3.095077  | -5.690648 | -2.067186 |
| C | -3.062605 | 3.076737  | -2.572534 | H | 5.230712  | -4.738003 | -1.388588 |
| C | -3.196988 | 3.763629  | -1.210134 | H | 4.863650  | -4.701727 | 0.978406  |
| C | -2.777107 | 5.226696  | -1.308918 | H | 3.685276  | -2.531527 | 0.025213  |
| C | -1.409565 | 5.358025  | -1.995828 | H | 5.860463  | -1.768016 | 0.287633  |
| H | -0.931201 | 2.840880  | -2.390772 | H | 5.336721  | -2.345292 | -2.534244 |
| H | -3.780898 | 3.514603  | -3.278685 | H | 2.312868  | -2.191830 | -2.114931 |
| H | -2.514801 | 3.252703  | -0.513232 | H | 2.537075  | -0.806594 | -3.937481 |
| H | -3.510797 | 5.751108  | -1.937714 | H | 2.501296  | -2.388780 | -4.720932 |
| H | -1.202428 | 6.406990  | -2.230406 | H | 4.577834  | -0.567587 | -4.485391 |
| C | -1.346868 | 2.610528  | -4.480203 | H | 6.371719  | -0.546416 | -2.402068 |
| O | -4.531356 | 3.718273  | -0.729985 | H | 6.908427  | 1.534081  | -1.219318 |
| O | -2.692648 | 5.851021  | -0.030255 | H | 6.522229  | 0.674260  | 1.000649  |
| O | -0.427264 | 4.837975  | -1.134853 | H | 4.110993  | 1.294741  | -0.039522 |
| H | -2.208625 | 2.039103  | -4.828601 | H | 4.750490  | 3.279693  | 0.957940  |
| O | -0.260441 | 1.686708  | -4.429345 | H | 5.183948  | 3.455465  | -1.898984 |
| H | -1.149660 | 3.412737  | -5.203124 | H | 3.197113  | 1.213005  | -2.520536 |
| H | -4.855929 | 2.797114  | -0.829744 | H | 4.717369  | 3.008637  | -4.445777 |
| H | -3.515947 | 5.646344  | 0.437084  | H | 3.077943  | 3.371590  | -3.857204 |
| H | 0.547050  | 2.157206  | -4.125184 | H | 3.165157  | 2.064670  | -5.859987 |
| O | 3.178298  | 5.527847  | -1.392109 | H | 4.281161  | 5.153888  | -1.022775 |
| C | 1.977354  | 4.764764  | -1.652562 | H | 2.802096  | 6.169315  | 0.602808  |
| C | 0.812705  | 5.534545  | -1.011827 | H | 2.964522  | 4.201216  | 2.266521  |
| C | 1.050236  | 5.678971  | 0.494648  | H | 1.034314  | 3.700914  | 0.427079  |
| C | 2.406742  | 6.320615  | 0.764729  | H | -0.307079 | 5.476374  | 1.565423  |
| C | 3.513105  | 5.598890  | -0.018651 | H | 0.406285  | 6.489470  | -0.596806 |
| H | 2.056703  | 3.785067  | -1.168261 | H | 1.086567  | 3.986386  | -2.213856 |
| H | 0.735318  | 6.529270  | -1.470543 | H | -0.453104 | 5.311431  | -3.429136 |
| H | 1.052624  | 4.667176  | 0.928557  | H | 1.165360  | 5.562800  | -4.123131 |
| H | 2.373279  | 7.358959  | 0.404941  | H | -0.028189 | 7.560810  | -3.744563 |
| H | 4.446410  | 6.168900  | 0.029381  | H | -1.638727 | 6.605335  | -1.439109 |

|            |                |           |           |            |                |           |           |
|------------|----------------|-----------|-----------|------------|----------------|-----------|-----------|
| C          | 1.892729       | 4.529153  | -3.170760 | H          | -3.605134      | 6.629006  | 0.003247  |
| O          | 0.057040       | 6.484385  | 1.109227  | H          | -2.509403      | 6.430180  | 2.092218  |
| O          | 2.748489       | 6.291756  | 2.147906  | H          | -2.699567      | 3.922324  | 1.062843  |
| H          | 0.940974       | 4.886718  | -3.565889 | H          | -4.721766      | 4.130082  | 2.165291  |
| O          | 1.965972       | 3.146643  | -3.516670 | H          | -5.059044      | 4.576911  | -0.766826 |
| H          | 2.700674       | 5.098761  | -3.647883 | H          | -2.427691      | 3.112489  | -1.291805 |
| H          | -0.813486      | 6.116525  | 0.864326  | H          | -3.850208      | 1.986377  | -2.708818 |
| H          | 1.972040       | 6.605968  | 2.634689  | H          | -3.261414      | 3.325963  | -3.695469 |
| H          | 2.817307       | 2.776969  | -3.192793 | H          | -5.789993      | 2.687327  | -2.983588 |
| C          | -3.579044      | -3.590246 | 4.389916  | C          | -0.752240      | -1.266588 | 0.948812  |
| C          | -3.554778      | -3.461543 | 3.000895  | C          | -0.228953      | -0.149717 | 0.297674  |
| C          | -4.119253      | -2.331778 | 2.409937  | C          | 0.760333       | 0.607713  | 0.924063  |
| C          | -4.718082      | -1.316493 | 3.173077  | C          | 1.237681       | 0.280211  | 2.201765  |
| C          | -4.728239      | -1.443992 | 4.575407  | C          | 0.723752       | -0.860216 | 2.846565  |
| C          | -4.155503      | -2.581887 | 5.160559  | C          | -0.266705      | -1.617711 | 2.209265  |
| C          | -5.251867      | -0.330931 | 5.464356  | C          | -1.341028      | -1.347001 | 4.141582  |
| C          | -4.478014      | 0.940094  | 5.207377  | C          | 2.793223       | -1.689958 | 3.898258  |
| C          | -3.565692      | 1.458544  | 6.126700  | C          | 3.242780       | -3.010145 | 3.864549  |
| C          | -2.858719      | 2.634369  | 5.857377  | C          | 4.591887       | -3.311366 | 3.651827  |
| C          | -3.063825      | 3.293297  | 4.646346  | C          | 5.498997       | -2.271175 | 3.455806  |
| C          | -3.963937      | 2.780212  | 3.708549  | C          | 5.061170       | -0.944741 | 3.457844  |
| C          | -4.677233      | 1.601537  | 3.975439  | C          | 3.708021       | -0.633421 | 3.672483  |
| C          | -5.380795      | -0.187010 | 2.380982  | C          | 2.242979       | 1.242894  | 2.821734  |
| N          | -5.667960      | 1.078633  | 3.097838  | N          | 3.238328       | 0.697760  | 3.777188  |
| C          | -6.700587      | -0.719782 | 1.784732  | C          | 1.505381       | 2.403289  | 3.526451  |
| C          | -6.282543      | 2.055318  | 2.192660  | C          | 4.220490       | 1.737640  | 4.090743  |
| C          | -7.579960      | 1.508899  | 1.606666  | C          | 3.527361       | 2.928588  | 4.746723  |
| N          | -7.322140      | 0.257986  | 0.880955  | N          | 2.444806       | 3.472180  | 3.909856  |
| C          | -8.543433      | -0.283212 | 0.276327  | C          | 1.749137       | 4.549263  | 4.627484  |
| H          | -3.143100      | -4.460812 | 4.871249  | H          | -1.506127      | -1.883938 | 0.470935  |
| H          | -3.096727      | -4.229131 | 2.382758  | H          | -0.577049      | 0.125567  | -0.693288 |
| H          | -4.110343      | -2.240679 | 1.327613  | H          | 1.185648       | 1.462871  | 0.405126  |
| H          | -4.158749      | -2.668385 | 6.244072  | H          | -0.645516      | -2.511116 | 2.699160  |
| H          | -5.162282      | -0.625711 | 6.513338  | H          | 0.799034       | -2.222821 | 4.507723  |
| H          | -6.313078      | -0.149065 | 5.254648  | H          | 1.281858       | -0.568135 | 4.912086  |
| H          | -3.419764      | 0.943004  | 7.072643  | H          | 2.526781       | -3.814239 | 4.011537  |
| H          | -2.160726      | 3.030562  | 6.588750  | H          | 4.927936       | -4.344288 | 3.656679  |
| H          | -2.521061      | 4.207001  | 4.421399  | H          | 6.550660       | -2.484957 | 3.290316  |
| H          | -4.103187      | 3.300895  | 2.767365  | H          | 5.781176       | -0.150909 | 3.294661  |
| H          | -4.715540      | 0.037891  | 1.528525  | H          | 2.795035       | 1.694743  | 1.981096  |
| H          | -7.382720      | -0.982331 | 2.612346  | H          | 0.973354       | 2.002232  | 4.406562  |
| H          | -6.488803      | -1.618931 | 1.205607  | H          | 0.764322       | 2.839056  | 2.851330  |
| H          | -5.608681      | 2.339252  | 1.368207  | H          | 4.766914       | 2.067330  | 3.191216  |
| H          | -6.505091      | 2.960571  | 2.763664  | H          | 4.949701       | 1.335879  | 4.797937  |
| H          | -8.000463      | 2.240966  | 0.909415  | H          | 4.258477       | 3.723511  | 4.927944  |
| H          | -8.313364      | 1.348930  | 2.415733  | H          | 3.128787       | 2.608775  | 5.725189  |
| H          | -9.305636      | -0.540432 | 1.029512  | H          | 1.288912       | 4.189463  | 5.562488  |
| H          | -8.293502      | -1.181847 | -0.293167 | H          | 0.980892       | 4.971356  | 3.979863  |
| H          | -8.969022      | 0.456785  | -0.407507 | H          | 2.467085       | 5.335554  | 4.879288  |
| <b>NR1</b> |                |           |           | <b>NR1</b> |                |           |           |
| E          | -5082.94773970 |           |           | E          | -5082.93235230 |           |           |
| ZPE        | -5081.382122   |           |           |            |                |           |           |
| H          | -5081.290965   |           |           |            |                |           |           |
| G          | -5081.506278   |           |           |            |                |           |           |
| S          | 453.163        |           |           |            |                |           |           |
| O          | 5.712257       | 3.584666  | -0.569615 | C          | 1.615721       | -5.869485 | -1.313942 |
| C          | 4.285901       | 3.646550  | -0.801115 | C          | 2.281673       | -6.055475 | 0.052766  |
| C          | 3.733391       | 4.763906  | 0.096429  | O          | 1.276913       | -6.335023 | 1.025006  |
| C          | 4.039874       | 4.454799  | 1.565233  | C          | 3.084828       | -4.814271 | 0.423389  |
| C          | 5.531927       | 4.211975  | 1.763875  | O          | 3.756464       | -5.100400 | 1.637251  |
| C          | 6.049285       | 3.185157  | 0.746109  | C          | 4.053311       | -4.410525 | -0.698476 |
| H          | 3.827314       | 2.698818  | -0.497830 | O          | 4.527032       | -3.106406 | -0.344789 |
| H          | 4.192545       | 5.721409  | -0.183198 | C          | 3.314330       | -4.357558 | -2.046795 |
| H          | 3.501340       | 3.531560  | 1.828343  | O          | 2.616697       | -5.595336 | -2.273152 |
| H          | 6.063421       | 5.156326  | 1.578790  | C          | 4.196994       | -4.151616 | -3.261641 |
| H          | 7.142644       | 3.138462  | 0.771795  | O          | 3.320712       | -3.941508 | -4.372593 |
| C          | 4.062253       | 3.808558  | -2.314740 | C          | 5.909352       | -2.833763 | -0.296326 |
| O          | 2.311000       | 4.856945  | 0.017657  | C          | 6.261125       | -2.291685 | 1.098458  |
| O          | 3.652905       | 5.519476  | 2.419456  | O          | 5.868863       | -3.241191 | 2.088369  |
| O          | 5.826933       | 3.730794  | 3.072446  | C          | 5.592021       | -0.941986 | 1.330653  |
| O          | 5.488543       | 1.934859  | 1.057801  | O          | 6.049669       | -0.455575 | 2.583141  |
| H          | 3.450252       | 4.687097  | -2.523383 | C          | 5.930877       | 0.004960  | 0.181852  |



|   |           |           |           |   |           |           |           |
|---|-----------|-----------|-----------|---|-----------|-----------|-----------|
| O | 3.367692  | 2.701522  | -2.887940 | O | 5.193604  | 1.214524  | 0.395394  |
| H | 5.041627  | 3.949493  | -2.789920 | C | 5.562235  | -0.625693 | -1.165676 |
| H | 2.712699  | 5.712858  | 2.241258  | O | 6.271594  | -1.882348 | -1.280211 |
| H | 5.350179  | 4.301507  | 3.693469  | C | 5.916374  | 0.246154  | -2.377709 |
| H | 3.888713  | 1.880781  | -2.741755 | O | 7.115979  | 0.997143  | -2.240431 |
| O | 6.755463  | -1.316322 | -0.109090 | C | 5.916033  | 2.405858  | 0.577185  |
| C | 5.930218  | -0.131917 | -0.198591 | C | 5.288320  | 3.195551  | 1.727633  |
| C | 6.310855  | 0.770308  | 0.985096  | O | 5.307598  | 2.369524  | 2.890500  |
| C | 6.071550  | 0.029688  | 2.304517  | C | 3.874969  | 3.640074  | 1.368304  |
| C | 6.799224  | -1.309685 | 2.313424  | O | 3.388092  | 4.439000  | 2.436288  |
| C | 6.486858  | -2.103024 | 1.036260  | C | 3.883637  | 4.391564  | 0.037267  |
| H | 4.876424  | -0.414059 | -0.095212 | O | 2.509958  | 4.577228  | -0.314528 |
| H | 7.368117  | 1.056095  | 0.906177  | C | 4.599412  | 3.583657  | -1.060589 |
| H | 4.990699  | -0.164479 | 2.381671  | O | 5.919628  | 3.191504  | -0.609049 |
| H | 7.881156  | -1.114891 | 2.322914  | C | 4.761223  | 4.348206  | -2.363427 |
| H | 7.145057  | -2.974157 | 0.959199  | O | 5.368844  | 5.609548  | -2.099630 |
| C | 6.118364  | 0.464633  | -1.603802 | C | 2.095731  | 5.818512  | -0.857282 |
| O | 6.525056  | 0.781009  | 3.419259  | C | 1.165113  | 6.520516  | 0.143206  |
| O | 6.434341  | -2.109071 | 3.435379  | O | 1.838061  | 6.643571  | 1.397398  |
| O | 5.138630  | -2.499631 | 1.076467  | C | -0.137494 | 5.746976  | 0.299695  |
| H | 6.391712  | 1.518786  | -1.542140 | O | -0.986690 | 6.518184  | 1.136852  |
| O | 4.926926  | 0.415884  | -2.387808 | C | -0.760116 | 5.462138  | -1.067206 |
| H | 6.937228  | -0.075844 | -2.095943 | O | -1.903885 | 4.632345  | -0.848113 |
| H | 6.115124  | 1.665390  | 3.364063  | C | 0.255708  | 4.752680  | -1.968942 |
| H | 6.489623  | -1.537198 | 4.215470  | O | 1.418336  | 5.611717  | -2.078687 |
| H | 4.633614  | -0.517926 | -2.480374 | C | -0.247943 | 4.431878  | -3.379075 |
| O | 3.713000  | -5.227252 | -0.942291 | O | -1.079542 | 5.436966  | -3.941409 |
| C | 4.060671  | -3.847750 | -0.681413 | C | -3.173964 | 5.204052  | -1.045522 |
| C | 4.799730  | -3.823695 | 0.665155  | C | -4.099945 | 4.775479  | 0.093891  |
| C | 3.885605  | -4.366720 | 1.767561  | O | -3.536175 | 5.189841  | 1.336639  |
| C | 3.365864  | -5.751667 | 1.399073  | C | -4.316193 | 3.267245  | 0.064110  |
| C | 2.780691  | -5.758658 | -0.020932 | O | -5.267748 | 2.968021  | 1.069276  |
| H | 3.144888  | -3.252921 | -0.588919 | C | -4.753710 | 2.775056  | -1.325375 |
| H | 5.704489  | -4.442180 | 0.597285  | O | -4.616149 | 1.349253  | -1.323786 |
| H | 3.026219  | -3.683369 | 1.851807  | C | -3.835231 | 3.360658  | -2.411554 |
| H | 4.216732  | -6.447836 | 1.404760  | O | -3.743609 | 4.789055  | -2.270854 |
| H | 2.596401  | -6.786954 | -0.347545 | C | -4.283301 | 3.112330  | -3.837555 |
| C | 4.836953  | -3.323650 | -1.901820 | O | -3.200099 | 3.513007  | -4.682580 |
| O | 4.563539  | -4.473278 | 3.008939  | C | -5.756179 | 0.525105  | -1.445020 |
| O | 2.357046  | -6.203394 | 2.298448  | C | -5.811205 | -0.454063 | -0.254800 |
| O | 1.584309  | -5.017879 | -0.020218 | O | -5.837284 | 0.308520  | 0.939900  |
| H | 5.795506  | -2.900435 | -1.599312 | C | -4.647642 | -1.444302 | -0.316072 |
| O | 4.147429  | -2.277614 | -2.584832 | O | -4.845842 | -2.433022 | 0.688657  |
| H | 5.029776  | -4.171964 | -2.571132 | C | -4.555725 | -2.084190 | -1.702706 |
| H | 4.985040  | -3.611351 | 3.189896  | O | -3.325417 | -2.819758 | -1.707130 |
| H | 2.692107  | -6.053479 | 3.194963  | C | -4.570258 | -1.029841 | -2.820351 |
| H | 3.271874  | -2.607948 | -2.885284 | O | -5.729603 | -0.187236 | -2.665164 |
| O | -1.022537 | -5.320559 | -2.602941 | C | -4.610235 | -1.626834 | -4.217046 |
| C | 0.149836  | -4.721040 | -2.003974 | O | -5.681002 | -2.565518 | -4.303634 |
| C | 0.466746  | -5.537517 | -0.741226 | C | -3.287901 | -4.081581 | -2.348373 |
| C | -0.719563 | -5.463926 | 0.224590  | C | -3.044100 | -5.178579 | -1.299547 |
| C | -1.992389 | -5.940550 | -0.467263 | O | -4.028656 | -5.052445 | -0.272056 |
| C | -2.183775 | -5.202476 | -1.801080 | C | -1.634923 | -5.089930 | -0.725937 |
| H | -0.081142 | -3.692395 | -1.705422 | O | -1.447753 | -6.226269 | 0.108585  |
| H | 0.652543  | -6.582906 | -1.021083 | C | -0.599122 | -5.016290 | -1.848344 |
| H | -0.856467 | -4.410512 | 0.509482  | O | 0.677534  | -4.823871 | -1.231310 |
| H | -1.883840 | -7.010963 | -0.693074 | C | -0.939352 | -3.855424 | -2.789387 |
| H | -2.991591 | -5.661370 | -2.379833 | O | -2.263465 | -4.108326 | -3.320702 |
| C | 1.246075  | -4.654289 | -3.081794 | C | 0.027404  | -3.665360 | -3.960944 |
| O | -0.519050 | -6.266747 | 1.378192  | O | 0.507430  | -4.879940 | -4.520474 |
| O | -3.152102 | -5.724137 | 0.332380  | H | 1.137193  | -6.797770 | -1.640073 |
| O | -2.470739 | -3.856521 | -1.520440 | H | 2.969873  | -6.908349 | -0.029976 |
| H | 2.146093  | -5.177459 | -2.756277 | H | 1.673510  | -6.180463 | 1.895651  |
| O | 1.652636  | -3.315486 | -3.364348 | H | 2.379552  | -3.979651 | 0.554067  |
| H | 0.865419  | -5.149771 | -3.984109 | H | 4.341176  | -4.344126 | 1.848897  |
| H | 0.365253  | -6.057432 | 1.736506  | H | 4.885758  | -5.124934 | -0.740639 |
| H | -2.941522 | -6.038112 | 1.224276  | H | 2.592096  | -3.533857 | -2.000043 |
| H | 0.878532  | -2.802130 | -3.684708 | H | 4.823995  | -5.040410 | -3.413439 |
| O | -3.986836 | -1.412698 | -3.812072 | H | 4.849448  | -3.285230 | -3.098578 |
| C | -2.882560 | -2.101624 | -3.181538 | H | 3.844862  | -3.949986 | -5.184185 |
| C | -3.480494 | -3.191127 | -2.278493 | H | 6.491520  | -3.733554 | -0.518925 |
| C | -4.414242 | -2.561295 | -1.240029 | H | 7.350533  | -2.151538 | 1.133217  |

|   |           |           |           |   |           |           |           |
|---|-----------|-----------|-----------|---|-----------|-----------|-----------|
| C | -5.471322 | -1.699505 | -1.919327 | H | 5.916629  | -2.777921 | 2.939349  |
| C | -4.806904 | -0.714992 | -2.894024 | H | 4.502050  | -1.088845 | 1.345995  |
| H | -2.327860 | -1.397525 | -2.551698 | H | 5.626348  | 0.408908  | 2.746528  |
| H | -4.038076 | -3.913978 | -2.888669 | H | 7.006128  | 0.215857  | 0.181801  |
| H | -3.800894 | -1.913265 | -0.595628 | H | 4.485014  | -0.828780 | -1.196255 |
| H | -6.132636 | -2.353578 | -2.504899 | H | 5.064506  | 0.902531  | -2.589471 |
| H | -5.561922 | -0.200710 | -3.497267 | H | 6.036103  | -0.419278 | -3.238864 |
| C | -1.933005 | -2.581367 | -4.292015 | H | 6.876019  | 1.838058  | -1.814728 |
| O | -5.082151 | -3.544589 | -0.465851 | H | 6.968491  | 2.196562  | 0.790539  |
| O | -6.235103 | -0.949347 | -0.977338 | H | 5.906131  | 4.088779  | 1.892064  |
| O | -4.055708 | 0.203514  | -2.140354 | H | 4.901051  | 2.876973  | 3.607785  |
| H | -1.735502 | -3.650093 | -4.196142 | H | 3.249926  | 2.743239  | 1.246527  |
| O | -0.658449 | -1.941060 | -4.239466 | H | 2.729857  | 5.069250  | 2.078880  |
| H | -2.423326 | -2.407051 | -5.258548 | H | 4.383108  | 5.357517  | 0.165254  |
| H | -4.399957 | -4.119937 | -0.069177 | H | 4.008047  | 2.683188  | -1.265497 |
| H | -6.436953 | -1.539865 | -0.235355 | H | 3.765902  | 4.468281  | -2.809597 |
| H | -0.782313 | -0.969093 | -4.315082 | H | 5.372276  | 3.744231  | -3.049017 |
| O | -2.966256 | 3.503525  | -3.320239 | H | 5.386662  | 6.105454  | -2.928831 |
| C | -2.802608 | 2.083130  | -3.113996 | H | 2.964356  | 6.439534  | -1.094482 |
| C | -4.103599 | 1.592224  | -2.469249 | H | 0.936116  | 7.519146  | -0.254365 |
| C | -4.327079 | 2.294795  | -1.123715 | H | 1.162804  | 6.933723  | 2.031251  |
| C | -4.256095 | 3.813286  | -1.259106 | H | 0.089690  | 4.778642  | 0.769811  |
| C | -3.033526 | 4.230504  | -2.107607 | H | -1.778080 | 5.982077  | 1.340881  |
| H | -1.976498 | 1.909553  | -2.415347 | H | -1.058729 | 6.396027  | -1.555069 |
| H | -4.947592 | 1.795645  | -3.141404 | H | 0.566625  | 3.808596  | -1.505355 |
| H | -3.511847 | 1.965178  | -0.460278 | H | -0.775112 | 3.473846  | -3.344236 |
| H | -5.150869 | 4.136499  | -1.810484 | H | 0.640267  | 4.291018  | -4.010303 |
| H | -3.130937 | 5.280522  | -2.401172 | H | -1.955610 | 5.031317  | -4.066330 |
| C | -2.412322 | 1.442165  | -4.457580 | H | -3.106458 | 6.294496  | -1.101186 |
| O | -5.588437 | 1.936624  | -0.577855 | H | -5.067178 | 5.273225  | -0.063693 |
| O | -4.198736 | 4.504324  | -0.017852 | H | -4.009347 | 4.707346  | 2.031474  |
| O | -1.867559 | 4.038312  | -1.343519 | H | -3.351910 | 2.783338  | 0.281055  |
| H | -3.103768 | 0.641222  | -4.722630 | H | -5.433974 | 1.996465  | 1.047061  |
| O | -1.117400 | 0.842656  | -4.423716 | H | -5.798104 | 3.061914  | -1.506114 |
| H | -2.468144 | 2.217051  | -5.233021 | H | -2.841595 | 2.915793  | -2.281206 |
| H | -5.668819 | 0.964079  | -0.645185 | H | -5.186911 | 3.700620  | -4.045210 |
| H | -4.334510 | 3.910619  | 0.765813  | H | -4.519866 | 2.049639  | -3.968159 |
| H | -0.448899 | 1.530570  | -4.209269 | H | -3.507332 | 3.515079  | -5.598628 |
| O | 1.359081  | 5.698282  | -1.934100 | H | -6.667193 | 1.131780  | -1.473560 |
| C | 0.418074  | 4.605285  | -2.039229 | H | -6.744037 | -1.028759 | -0.355551 |
| C | -0.876126 | 5.064395  | -1.353690 | H | -5.550643 | -0.192567 | 1.755468  |
| C | -0.602234 | 5.398490  | 0.115202  | H | -3.712464 | -0.893837 | -0.133713 |
| C | 0.522976  | 6.423099  | 0.224955  | H | -4.428542 | -3.264682 | 0.387066  |
| C | 1.741025  | 5.982796  | -0.601033 | H | -5.404742 | -2.762217 | -1.839905 |
| H | 0.811152  | 3.734462  | -1.502907 | H | -3.662400 | -0.418611 | -2.744128 |
| H | -1.259808 | 5.955850  | -1.867801 | H | -3.643024 | -2.107697 | -4.410085 |
| H | -0.278800 | 4.471721  | 0.613246  | H | -4.737702 | -0.808616 | -4.939128 |
| H | 0.164264  | 7.372094  | -0.198434 | H | -5.633753 | -2.982905 | -5.173814 |
| H | 2.468374  | 6.797951  | -0.669886 | H | -4.220420 | -4.258821 | -2.891434 |
| C | 0.300609  | 4.225759  | -3.525867 | H | -3.153272 | -6.150285 | -1.801159 |
| O | -1.753099 | 5.932621  | 0.754189  | H | -3.777761 | -5.678647 | 0.424402  |
| O | 0.949200  | 6.616965  | 1.571128  | H | -1.554734 | -4.164706 | -0.136718 |
| H | -0.734606 | 4.296166  | -3.863240 | H | -0.557539 | -6.163846 | 0.509953  |
| O | 0.706814  | 2.882388  | -3.782452 | H | -0.599303 | -5.942526 | -2.432493 |
| H | 0.901773  | 4.937500  | -4.106305 | H | -0.966406 | -2.914763 | -2.225635 |
| H | -2.521406 | 5.377342  | 0.500215  | H | 0.861864  | -3.045176 | -3.620949 |
| H | 0.152757  | 6.765385  | 2.101781  | H | -0.511467 | -3.092904 | -4.728395 |
| H | 1.642290  | 2.771361  | -3.502425 | H | 1.466955  | -4.893771 | -4.359138 |
| C | -7.723858 | -1.798974 | 3.686300  | C | -0.502633 | -4.610406 | 4.288348  |
| C | -7.850174 | -0.938813 | 2.595033  | C | -1.367649 | -4.535279 | 3.196265  |
| C | -6.809988 | -0.062192 | 2.289210  | C | -2.071796 | -3.355505 | 2.960861  |
| C | -5.632286 | -0.017006 | 3.053516  | C | -1.941533 | -2.237146 | 3.798430  |
| C | -5.501973 | -0.896356 | 4.144412  | C | -1.054811 | -2.309707 | 4.889203  |
| C | -6.553087 | -1.775164 | 4.442047  | C | -0.347332 | -3.498623 | 5.114999  |
| C | -4.207435 | -0.983889 | 4.930670  | C | -0.776906 | -1.096424 | 5.755795  |
| C | -3.070845 | -1.346368 | 4.004629  | C | -0.257220 | 0.037974  | 4.905048  |
| C | -2.477429 | -2.609032 | 4.012579  | C | 1.076971  | 0.444644  | 4.942228  |
| C | -1.430259 | -2.921923 | 3.140189  | C | 1.531334  | 1.502626  | 4.149646  |
| C | -0.974948 | -1.952437 | 2.247520  | C | 0.635148  | 2.161108  | 3.309788  |
| C | -1.570872 | -0.688344 | 2.213190  | C | -0.700047 | 1.752688  | 3.244168  |
| C | -2.627436 | -0.373013 | 3.081345  | C | -1.159048 | 0.682432  | 4.028587  |
| C | -4.622688 | 1.059453  | 2.651556  | C | -2.862866 | -1.059164 | 3.478929  |

|           |                |           |           |           |                |           |           |
|-----------|----------------|-----------|-----------|-----------|----------------|-----------|-----------|
| N         | -3.227967      | 0.916518  | 3.138037  | N         | -2.519392      | 0.263895  | 4.054643  |
| C         | -5.163432      | 2.428831  | 3.113144  | C         | -4.290580      | -1.436613 | 3.929309  |
| C         | -2.400268      | 2.019917  | 2.641261  | C         | -3.499120      | 1.266074  | 3.627588  |
| C         | -2.951301      | 3.364461  | 3.100164  | C         | -4.900248      | 0.884212  | 4.089912  |
| N         | -4.333413      | 3.540341  | 2.630742  | N         | -5.280631      | -0.424670 | 3.539437  |
| C         | -4.879390      | 4.828426  | 3.075522  | C         | -6.628795      | -0.813895 | 3.966583  |
| H         | -8.522589      | -2.489477 | 3.940203  | H         | 0.054897       | -5.520637 | 4.489748  |
| H         | -8.749098      | -0.946907 | 1.985908  | H         | -1.494074      | -5.377540 | 2.523855  |
| H         | -6.911756      | 0.611657  | 1.442964  | H         | -2.750202      | -3.296353 | 2.114133  |
| H         | -6.440612      | -2.457176 | 5.280812  | H         | 0.341960       | -3.543850 | 5.954266  |
| H         | -4.307145      | -1.731609 | 5.721936  | H         | -0.048887      | -1.355825 | 6.529125  |
| H         | -3.987184      | -0.019179 | 5.403680  | H         | -1.697751      | -0.771528 | 6.255629  |
| H         | -2.831057      | -3.352321 | 4.722701  | H         | 1.763733       | -0.063752 | 5.614440  |
| H         | -0.982888      | -3.911403 | 3.153769  | H         | 2.572487       | 1.807869  | 4.183542  |
| H         | -0.155853      | -2.175095 | 1.569439  | H         | 0.979367       | 2.995079  | 2.705160  |
| H         | -1.209450      | 0.047340  | 1.503589  | H         | -1.379276      | 2.272050  | 2.577052  |
| H         | -4.611592      | 1.082694  | 1.550576  | H         | -2.891116      | -0.965730 | 2.379310  |
| H         | -5.225469      | 2.431139  | 4.215972  | H         | -4.286804      | -1.584441 | 5.023657  |
| H         | -6.174813      | 2.562205  | 2.721427  | H         | -4.569645      | -2.379155 | 3.455209  |
| H         | -2.331231      | 2.025577  | 1.539582  | H         | -3.513270      | 1.393010  | 2.532810  |
| H         | -1.387768      | 1.896949  | 3.034169  | H         | -3.229416      | 2.228216  | 4.070436  |
| H         | -2.337887      | 4.171058  | 2.685936  | H         | -5.612443      | 1.636216  | 3.735622  |
| H         | -2.901945      | 3.425426  | 4.201298  | H         | -4.936082      | 0.871349  | 5.192792  |
| H         | -4.915212      | 4.909223  | 4.174060  | H         | -6.710785      | -0.907362 | 5.061426  |
| H         | -5.893180      | 4.951726  | 2.685012  | H         | -6.890662      | -1.774708 | 3.515080  |
| H         | -4.257454      | 5.640058  | 2.688704  | H         | -7.347702      | -0.063310 | 3.626754  |
| <b>M1</b> |                |           |           | <b>M1</b> |                |           |           |
| E         | -5082.94072289 |           |           | E         | -5082.92006341 |           |           |
| O         | 5.509708       | 0.893844  | -2.374631 | C         | 0.463060       | 5.823395  | -0.655353 |
| C         | 4.408516       | 1.726180  | -1.944042 | C         | -0.143717      | 5.915187  | 0.748806  |
| C         | 4.941010       | 2.644775  | -0.833855 | O         | 0.870478       | 5.610741  | 1.702238  |
| C         | 5.485211       | 1.800120  | 0.321425  | C         | -1.338002      | 4.975001  | 0.875253  |
| C         | 6.521327       | 0.798636  | -0.176818 | O         | -1.907907      | 5.187243  | 2.154120  |
| C         | 5.963398       | 0.005853  | -1.368257 | C         | -2.345835      | 5.186244  | -0.264444 |
| H         | 3.621353       | 1.093414  | -1.520048 | O         | -3.280320      | 4.106011  | -0.152520 |
| H         | 5.736028       | 3.287648  | -1.234073 | C         | -1.611558      | 5.136638  | -1.615440 |
| H         | 4.642122       | 1.237578  | 0.746232  | O         | -0.541157      | 6.096738  | -1.612264 |
| H         | 7.401400       | 1.353556  | -0.532682 | C         | -2.456751      | 5.448063  | -2.834253 |
| H         | 6.751994       | -0.594037 | -1.833596 | O         | -1.659080      | 5.129277  | -3.980053 |
| C         | 3.826620       | 2.419640  | -3.186793 | C         | -4.670601      | 4.356097  | -0.215604 |
| O         | 3.901710       | 3.442085  | -0.262578 | C         | -5.327744      | 3.895107  | 1.093695  |
| O         | 6.095178       | 2.603870  | 1.321687  | O         | -4.697859      | 4.556284  | 2.190382  |
| O         | 6.901958       | -0.127178 | 0.837748  | C         | -5.242511      | 2.381072  | 1.244590  |
| O         | 4.919705       | -0.812455 | -0.904587 | O         | -5.993198      | 2.036910  | 2.397904  |
| H         | 3.795887       | 3.501201  | -3.047783 | C         | -5.762674      | 1.692143  | -0.015713 |
| O         | 2.482196       | 2.020847  | -3.456346 | O         | -5.501484      | 0.291208  | 0.134497  |
| H         | 4.481176       | 2.199589  | -4.039734 | C         | -5.060175      | 2.236590  | -1.265050 |
| H         | 5.443366       | 3.278132  | 1.593307  | O         | -5.255229      | 3.671294  | -1.305783 |
| H         | 7.034974       | 0.386549  | 1.648180  | C         | -5.573076      | 1.632028  | -2.582109 |
| H         | 2.454690       | 1.051216  | -3.618585 | O         | -6.945264      | 1.256332  | -2.572430 |
| O         | 3.578411       | -3.746414 | -2.674192 | C         | -6.582049      | -0.607803 | 0.105392  |
| C         | 3.631191       | -2.340666 | -2.338145 | C         | -6.470812      | -1.564640 | 1.293915  |
| C         | 4.819263       | -2.153924 | -1.382428 | O         | -6.490074      | -0.800939 | 2.498387  |
| C         | 4.613217       | -3.007531 | -0.127335 | C         | -5.203360      | -2.400971 | 1.185161  |
| C         | 4.351231       | -4.464066 | -0.491782 | O         | -5.219337      | -3.322747 | 2.262172  |
| C         | 3.267769       | -4.580336 | -1.574508 | C         | -5.138526      | -3.099195 | -0.172937 |
| H         | 2.713410       | -2.057857 | -1.810749 | O         | -3.815965      | -3.640380 | -0.275605 |
| H         | 5.749325       | -2.449268 | -1.885903 | C         | -5.389520      | -2.123653 | -1.339790 |
| H         | 3.728554       | -2.614598 | 0.396063  | O         | -6.593727      | -1.350671 | -1.106574 |
| H         | 5.276848       | -4.881650 | -0.913343 | C         | -5.544083      | -2.828786 | -2.676854 |
| H         | 3.244899       | -5.598590 | -1.975412 | O         | -6.549627      | -3.831854 | -2.566369 |
| C         | 3.677929       | -1.545897 | -3.654253 | C         | -3.639661      | -4.974296 | -0.712436 |
| O         | 5.748119       | -2.973263 | 0.723658  | C         | -2.977147      | -5.789208 | 0.409963  |
| C         | 3.937885       | -5.229897 | 0.637465  | O         | -3.768380      | -5.697875 | 1.594247  |
| O         | 2.022352       | -4.243633 | -1.011898 | C         | -1.560046      | -5.290411 | 0.661433  |
| H         | 4.513814       | -0.845300 | -3.652577 | O         | -0.978134      | -6.142469 | 1.640569  |
| O         | 2.508405       | -0.755135 | -3.865511 | C         | -0.769794      | -5.271906 | -0.646878 |
| H         | 3.825914       | -2.257666 | -4.476580 | O         | 0.517134       | -4.703326 | -0.381580 |
| H         | 5.941780       | -2.036176 | 0.915120  | C         | -1.511812      | -4.444240 | -1.702268 |
| H         | 4.558579       | -5.029157 | 1.353670  | O         | -2.831740      | -5.016448 | -1.870707 |
| H         | 1.717067       | -1.337655 | -3.887327 | C         | -0.829692      | -4.407076 | -3.070519 |
| O         | -1.208311      | -5.233332 | -2.477884 | O         | -0.322928      | -5.665141 | -3.488549 |

|   |           |           |           |   |           |           |           |
|---|-----------|-----------|-----------|---|-----------|-----------|-----------|
| C | -0.102932 | -4.325437 | -2.262698 | C | 1.590181  | -5.610447 | -0.282433 |
| C | 0.891080  | -5.050661 | -1.342997 | C | 2.504914  | -5.206683 | 0.878364  |
| C | 0.210095  | -5.377076 | -0.010359 | O | 1.716539  | -5.101137 | 2.063654  |
| C | -1.064763 | -6.180998 | -0.249904 | C | 3.247079  | -3.907340 | 0.583849  |
| C | -1.951614 | -5.499901 | -1.303387 | O | 4.196717  | -3.735763 | 1.620401  |
| H | -0.465476 | -3.429423 | -1.747705 | C | 3.900749  | -3.914577 | -0.806943 |
| H | 1.221004  | -5.980259 | -1.825481 | O | 4.290138  | -2.558490 | -1.050844 |
| H | -0.063573 | -4.423306 | 0.467051  | C | 2.884830  | -4.377968 | -1.863019 |
| H | -0.777297 | -7.163891 | -0.650100 | O | 2.344448  | -5.653185 | -1.476842 |
| H | -2.759280 | -6.171721 | -1.610626 | C | 3.440365  | -4.553965 | -3.261889 |
| C | 0.421595  | -3.887445 | -3.640523 | O | 2.320593  | -4.742531 | -4.134491 |
| O | 1.051170  | -6.138158 | 0.841906  | C | 5.602409  | -2.248304 | -1.469058 |
| O | -1.832097 | -6.342087 | 0.939819  | C | 6.248410  | -1.307900 | -0.444364 |
| O | -2.472123 | -4.317162 | -0.750080 | O | 6.272194  | -1.949589 | 0.831279  |
| H | 1.483898  | -4.111812 | -3.743054 | C | 5.484493  | 0.007774  | -0.377393 |
| O | 0.296993  | -2.480413 | -3.849991 | O | 6.195043  | 0.858527  | 0.509528  |
| H | -0.126191 | -4.448979 | -4.407847 | C | 5.322841  | 0.620813  | -1.767156 |
| H | 1.917531  | -5.689650 | 0.882683  | O | 4.372711  | 1.683529  | -1.618691 |
| H | -1.221378 | -6.636610 | 1.631599  | C | 4.796569  | -0.410257 | -2.783064 |
| H | -0.652381 | -2.228929 | -3.806303 | O | 5.589340  | -1.616658 | -2.732446 |
| O | -5.372624 | -2.425705 | -1.994211 | C | 4.821429  | 0.100224  | -4.213743 |
| C | -3.965339 | -2.744948 | -1.898646 | O | 6.133704  | 0.558432  | -4.529781 |
| C | -3.838574 | -3.983963 | -0.999184 | C | 4.643338  | 2.949791  | -2.182554 |
| C | -4.445815 | -3.700582 | 0.378367  | C | 4.710204  | 3.996658  | -1.058881 |
| C | -5.878219 | -3.196841 | 0.245483  | O | 5.686364  | 3.602618  | -0.094476 |
| C | -5.948076 | -2.038901 | -0.760422 | C | 3.342911  | 4.169508  | -0.409465 |
| H | -3.436498 | -1.914158 | -1.420347 | O | 3.464498  | 5.207998  | 0.552730  |
| H | -4.358252 | -4.832573 | -1.463411 | C | 2.294250  | 4.473572  | -1.479303 |
| H | -3.846037 | -2.906149 | 0.847282  | O | 1.015950  | 4.541946  | -0.841098 |
| H | -6.498347 | -4.014100 | -0.149572 | C | 2.302754  | 3.372026  | -2.545224 |
| H | -6.990159 | -1.789785 | -0.984052 | O | 3.636360  | 3.310396  | -3.107832 |
| C | -3.417749 | -2.882906 | -3.329791 | C | 1.307000  | 3.584686  | -3.687023 |
| O | -4.462859 | -4.859733 | 1.195634  | O | 1.231695  | 4.928584  | -4.139009 |
| O | -6.401389 | -2.740743 | 1.490167  | H | 1.223375  | 6.597323  | -0.793408 |
| O | -5.279076 | -0.931071 | -0.208873 | H | -0.495818 | 6.947052  | 0.888806  |
| H | -2.917698 | -3.843506 | -3.461311 | H | 0.440840  | 5.399103  | 2.544575  |
| O | -2.443313 | -1.888942 | -3.646063 | H | -0.963667 | 3.944790  | 0.781424  |
| H | -4.266611 | -2.838206 | -4.024292 | H | -2.790613 | 4.764526  | 2.175719  |
| H | -3.550012 | -5.203636 | 1.237724  | H | -2.855562 | 6.149809  | -0.136435 |
| H | -6.189952 | -3.420774 | 2.147207  | H | -1.199748 | 4.127423  | -1.735759 |
| H | -2.839548 | -0.996301 | -3.538331 | H | -2.735323 | 6.510007  | -2.828558 |
| O | -5.682705 | 2.559312  | -1.298074 | H | -3.370439 | 4.842085  | -2.812197 |
| C | -5.060999 | 1.253922  | -1.309981 | H | -2.113419 | 5.447027  | -4.771401 |
| C | -5.860716 | 0.366176  | -0.345253 | H | -4.862614 | 5.419653  | -0.388115 |
| C | -5.838847 | 0.971609  | 1.061817  | H | -6.387920 | 4.180481  | 1.048035  |
| C | -6.318501 | 2.419127  | 1.035396  | H | -5.024440 | 4.117335  | 2.991527  |
| C | -5.577547 | 3.216450  | -0.048080 | H | -4.186290 | 2.101708  | 1.372846  |
| H | -4.036035 | 1.341007  | -0.933764 | H | -5.979420 | 1.063576  | 2.493002  |
| H | -6.898055 | 0.281644  | -0.695196 | H | -6.839565 | 1.865766  | -0.115859 |
| H | -4.794663 | 0.962356  | 1.410773  | H | -3.985375 | 2.037829  | -1.198185 |
| H | -7.386264 | 2.423786  | 0.773693  | H | -4.938512 | 0.776791  | -2.839468 |
| H | -6.045897 | 4.195811  | -0.187754 | H | -5.436203 | 2.386412  | -3.363913 |
| C | -4.982658 | 0.778379  | -2.770962 | H | -6.980157 | 0.328933  | -2.283863 |
| O | -6.670887 | 0.252089  | 1.957457  | H | -7.536230 | -0.073179 | 0.131477  |
| O | -6.116096 | 3.072456  | 2.285453  | H | -7.340352 | -2.235614 | 1.263344  |
| O | -4.234412 | 3.358162  | 0.343464  | H | -6.201787 | -1.395849 | 3.207442  |
| H | -5.447812 | -0.201640 | -2.884669 | H | -4.337601 | -1.726024 | 1.261457  |
| O | -3.638773 | 0.627502  | -3.228871 | H | -4.555361 | -4.019137 | 2.082176  |
| H | -5.532561 | 1.495725  | -3.393318 | H | -5.883765 | -3.905529 | -0.202811 |
| H | -6.411322 | -0.687995 | 1.910475  | H | -4.534390 | -1.441212 | -1.410786 |
| H | -6.458037 | 2.478383  | 2.970092  | H | -4.571912 | -3.263888 | -2.941002 |
| H | -3.181895 | 1.497387  | -3.188649 | H | -5.804517 | -2.082243 | -3.440192 |
| O | -1.931075 | 5.883025  | -1.024077 | H | -6.557628 | -4.330956 | -3.393561 |
| C | -2.543917 | 4.573709  | -0.975725 | H | -4.600074 | -5.410970 | -1.001774 |
| C | -3.590114 | 4.617267  | 0.148274  | H | -2.929129 | -6.835602 | 0.077056  |
| C | -2.900995 | 4.932561  | 1.479529  | H | -3.212597 | -6.050529 | 2.307738  |
| C | -2.092590 | 6.221696  | 1.371438  | H | -1.619947 | -4.261238 | 1.041421  |
| C | -1.182141 | 6.199095  | 0.134246  | H | -0.149208 | -5.727315 | 1.945686  |
| H | -1.784999 | 3.826123  | -0.718952 | H | -0.656828 | -6.288897 | -1.037249 |
| H | -4.335144 | 5.392197  | -0.075441 | H | -1.620946 | -3.408669 | -1.356635 |
| H | -2.209291 | 4.104438  | 1.699520  | H | -0.030826 | -3.659871 | -3.031654 |
| H | -2.797952 | 7.055019  | 1.241276  | H | -1.576782 | -4.047833 | -3.792192 |

|            |           |           |           |            |           |           |           |
|------------|-----------|-----------|-----------|------------|-----------|-----------|-----------|
| H          | -0.766894 | 7.195613  | -0.046453 | H          | 0.641517  | -5.559458 | -3.583901 |
| C          | -3.063389 | 4.247734  | -2.386440 | H          | 1.219840  | -6.628095 | -0.130744 |
| O          | -3.838228 | 5.094764  | 2.532077  | H          | 3.250200  | -6.006155 | 0.992849  |
| O          | -1.277866 | 6.443667  | 2.519013  | H          | 2.277692  | -4.721193 | 2.756944  |
| O          | -0.153009 | 5.264953  | 0.348344  | H          | 2.514148  | -3.085695 | 0.581568  |
| H          | -4.124274 | 3.996246  | -2.361245 | H          | 4.770473  | -2.976315 | 1.392181  |
| O          | -2.407603 | 3.119890  | -2.966002 | H          | 4.778005  | -4.574184 | -0.799910 |
| H          | -2.934832 | 5.140981  | -3.010971 | H          | 2.079847  | -3.634323 | -1.905101 |
| H          | -4.422374 | 4.312644  | 2.529338  | H          | 4.110385  | -5.423419 | -3.284728 |
| H          | -1.843721 | 6.315174  | 3.294684  | H          | 4.010093  | -3.660767 | -3.544567 |
| H          | -1.444115 | 3.304708  | -3.033927 | H          | 2.647902  | -4.982069 | -5.011486 |
| O          | 3.014699  | 5.186625  | -1.525980 | H          | 6.197861  | -3.158796 | -1.590346 |
| C          | 1.647678  | 4.793331  | -1.264194 | H          | 7.275949  | -1.107827 | -0.777365 |
| C          | 1.173612  | 5.610038  | -0.052855 | H          | 6.522416  | -1.267809 | 1.474034  |
| C          | 2.062033  | 5.303127  | 1.156662  | H          | 4.477396  | -0.202765 | 0.010854  |
| C          | 3.530148  | 5.540477  | 0.816419  | H          | 5.853098  | 1.769873  | 0.401039  |
| C          | 3.911259  | 4.828892  | -0.490538 | H          | 6.286436  | 1.012240  | -2.109321 |
| H          | 1.621257  | 3.730794  | -0.999214 | H          | 3.757446  | -0.651151 | -2.528313 |
| H          | 1.230291  | 6.680801  | -0.289581 | H          | 4.085962  | 0.910583  | -4.295479 |
| H          | 1.929595  | 4.238328  | 1.404063  | H          | 4.510151  | -0.716308 | -4.880112 |
| H          | 3.672847  | 6.618671  | 0.655397  | H          | 6.095024  | 0.978526  | -5.398869 |
| H          | 4.898807  | 5.159014  | -0.828307 | H          | 5.576563  | 2.923726  | -2.753124 |
| C          | 0.851391  | 4.971452  | -2.568578 | H          | 5.006327  | 4.953231  | -1.512273 |
| O          | 1.736640  | 6.119317  | 2.270251  | H          | 5.530745  | 4.168882  | 0.678673  |
| O          | 4.401267  | 5.078472  | 1.845043  | H          | 3.066777  | 3.224842  | 0.081118  |
| H          | -0.003557 | 5.630940  | -2.414859 | H          | 2.641512  | 5.228175  | 1.079722  |
| O          | 0.315183  | 3.741935  | -3.056404 | H          | 2.518064  | 5.424869  | -1.973711 |
| H          | 1.514894  | 5.433402  | -3.310718 | H          | 2.075174  | 2.404136  | -2.080666 |
| H          | 0.776997  | 6.033824  | 2.427834  | H          | 0.325979  | 3.233580  | -3.352205 |
| H          | 4.057500  | 5.425791  | 2.681451  | H          | 1.621455  | 2.931643  | -4.513147 |
| H          | 1.050458  | 3.116803  | -3.243385 | H          | 0.318787  | 5.226960  | -3.974344 |
| C          | 4.892834  | -0.834961 | 3.836071  | C          | 2.866882  | 4.005946  | 4.498225  |
| C          | 4.375338  | 0.425283  | 3.537357  | C          | 1.488562  | 3.946380  | 4.709787  |
| C          | 3.050528  | 0.539334  | 3.116494  | C          | 0.778246  | 2.818953  | 4.295867  |
| C          | 2.218610  | -0.582254 | 2.982431  | C          | 1.415686  | 1.737017  | 3.670100  |
| C          | 2.738022  | -1.851405 | 3.305629  | C          | 2.809622  | 1.789895  | 3.479592  |
| C          | 4.070432  | -1.956066 | 3.727323  | C          | 3.514293  | 2.927354  | 3.896074  |
| C          | 1.844819  | -3.077811 | 3.324080  | C          | 3.556839  | 0.593409  | 2.924648  |
| C          | 0.723335  | -2.867425 | 4.314406  | C          | 3.353380  | -0.603619 | 3.823281  |
| C          | 0.667052  | -3.548014 | 5.530776  | C          | 4.371892  | -1.115557 | 4.627781  |
| C          | -0.377000 | -3.329293 | 6.434841  | C          | 4.161636  | -2.236942 | 5.436214  |
| C          | -1.373070 | -2.407481 | 6.117315  | C          | 2.907755  | -2.846533 | 5.445646  |
| C          | -1.324453 | -1.705921 | 4.909854  | C          | 1.869624  | -2.335810 | 4.660819  |
| C          | -0.280612 | -1.923780 | 3.997382  | C          | 2.076858  | -1.212031 | 3.844128  |
| C          | 0.827110  | -0.323883 | 2.411353  | C          | 0.508693  | 0.627617  | 3.144968  |
| N          | -0.235247 | -1.309740 | 2.718126  | N          | 1.092224  | -0.719422 | 2.953193  |
| C          | 0.920299  | -0.186983 | 0.874630  | C          | -0.088271 | 1.082808  | 1.796520  |
| C          | -1.512339 | -0.852241 | 2.167344  | C          | 0.056460  | -1.658728 | 2.518049  |
| C          | -1.409098 | -0.708218 | 0.652497  | C          | -0.526544 | -1.202755 | 1.184147  |
| N          | -0.352481 | 0.233554  | 0.294308  | N          | -1.084916 | 0.142101  | 1.293242  |
| C          | -0.254714 | 0.404064  | -1.152675 | C          | -1.631933 | 0.592055  | 0.018682  |
| H          | 5.921512  | -0.945096 | 4.166607  | H          | 3.435716  | 4.875257  | 4.814321  |
| H          | 4.997307  | 1.311687  | 3.610951  | H          | 0.970309  | 4.763392  | 5.203638  |
| H          | 2.650691  | 1.523309  | 2.882736  | H          | -0.296117 | 2.777486  | 4.458153  |
| H          | 4.462005  | -2.937023 | 3.982708  | H          | 4.591031  | 2.957717  | 3.751446  |
| H          | 2.433021  | -3.958722 | 3.594770  | H          | 4.619124  | 0.825252  | 2.817891  |
| H          | 1.417437  | -3.253494 | 2.329551  | H          | 3.170982  | 0.347492  | 1.927506  |
| H          | 1.443469  | -4.272029 | 5.765143  | H          | 5.349468  | -0.640298 | 4.604576  |
| H          | -0.410951 | -3.876992 | 7.371798  | H          | 4.969795  | -2.629554 | 6.045768  |
| H          | -2.190346 | -2.223987 | 6.809056  | H          | 2.725859  | -3.715388 | 6.071849  |
| H          | -2.101938 | -0.984660 | 4.682936  | H          | 0.894413  | -2.809654 | 4.693998  |
| H          | 0.505185  | 0.661324  | 2.794120  | H          | -0.334595 | 0.540904  | 3.853287  |
| H          | 1.264396  | -1.155922 | 0.461517  | H          | 0.744803  | 1.230335  | 1.080878  |
| H          | 1.677471  | 0.564942  | 0.631237  | H          | -0.573789 | 2.052924  | 1.940604  |
| H          | -1.825832 | 0.114612  | 2.599121  | H          | -0.757673 | -1.745747 | 3.258819  |
| H          | -2.280188 | -1.591950 | 2.407360  | H          | 0.505896  | -2.646013 | 2.390150  |
| H          | -2.363971 | -0.339363 | 0.262289  | H          | -1.327389 | -1.886998 | 0.881360  |
| H          | -1.234041 | -1.708409 | 0.210693  | H          | 0.266143  | -1.254218 | 0.412119  |
| H          | -0.004444 | -0.533296 | -1.683084 | H          | -0.875248 | 0.617642  | -0.788202 |
| H          | 0.515801  | 1.142163  | -1.395260 | H          | -2.041975 | 1.600322  | 0.126402  |
| H          | -1.208418 | 0.768434  | -1.546809 | H          | -2.440266 | -0.076232 | -0.293637 |
| <b>FA1</b> |           |           |           | <b>FA1</b> |           |           |           |

|     |                |           |           |     |                |           |           |
|-----|----------------|-----------|-----------|-----|----------------|-----------|-----------|
| E   | -5082.95082036 |           |           | E   | -5082.93428442 |           |           |
| ZPE | -5081.384820   |           |           | ZPE | -5081.372338   |           |           |
| H   | -5081.293854   |           |           | H   | -5081.278580   |           |           |
| G   | -5081.507487   |           |           | G   | -5081.502429   |           |           |
| S   | 449.629        |           |           | S   | 471.130        |           |           |
| O   | -5.677011      | 3.065430  | -0.811105 | C   | -2.187587      | 5.967891  | -0.724855 |
| C   | -5.221624      | 1.692768  | -0.836268 | C   | -2.876834      | 5.995940  | 0.641267  |
| C   | -5.937585      | 0.964197  | 0.311047  | O   | -1.908313      | 6.309105  | 1.639855  |
| C   | -5.587471      | 1.627376  | 1.646408  | C   | -3.551957      | 4.661117  | 0.925895  |
| C   | -5.899401      | 3.118970  | 1.602300  | O   | -4.242051      | 4.802955  | 2.154054  |
| C   | -5.285961      | 3.768137  | 0.352797  | C   | -4.480450      | 4.251191  | -0.223872 |
| H   | -4.142351      | 1.664188  | -0.648709 | O   | -4.847669      | 2.892409  | 0.036932  |
| H   | -7.023207      | 1.006176  | 0.151336  | C   | -3.747728      | 4.345120  | -1.574843 |
| H   | -4.504961      | 1.503182  | 1.804409  | O   | -3.143553      | 5.649464  | -1.722273 |
| H   | -6.989957      | 3.238719  | 1.531723  | C   | -4.647069      | 4.153266  | -2.780618 |
| H   | -5.670457      | 4.785248  | 0.227217  | O   | -3.804499      | 4.065918  | -3.926987 |
| C   | -5.464870      | 1.146507  | -2.253668 | C   | -6.206233      | 2.514195  | 0.080689  |
| O   | -5.510632      | -0.391804 | 0.440492  | C   | -6.496150      | 1.846783  | 1.434598  |
| O   | -6.318372      | 1.061896  | 2.722767  | O   | -6.162362      | 2.746217  | 2.490243  |
| O   | -5.404426      | 3.804423  | 2.749529  | C   | -5.727237      | 0.536954  | 1.560175  |
| O   | -3.886671      | 3.780140  | 0.495041  | O   | -6.125565      | -0.067870 | 2.780290  |
| H   | -6.050964      | 0.227330  | -2.219589 | C   | -6.022408      | -0.345462 | 0.349895  |
| O   | -4.253862      | 0.811769  | -2.929988 | O   | -5.206082      | -1.516938 | 0.459080  |
| H   | -6.034802      | 1.898964  | -2.813913 | C   | -5.719996      | 0.403912  | -0.952135 |
| H   | -6.192767      | 0.094218  | 2.688290  | O   | -6.514906      | 1.613722  | -0.967007 |
| H   | -5.674511      | 3.286979  | 3.522756  | C   | -6.035433      | -0.404277 | -2.218011 |
| H   | -3.682659      | 1.609578  | -2.987414 | O   | -7.176365      | -1.246984 | -2.116781 |
| O   | -1.634515      | 5.989053  | -1.400623 | C   | -5.850228      | -2.758879 | 0.593304  |
| C   | -2.337230      | 4.747675  | -1.159871 | C   | -5.150144      | -3.568214 | 1.686962  |
| C   | -3.172492      | 4.955269  | 0.112990  | O   | -5.199252      | -2.818649 | 2.898403  |
| C   | -2.239417      | 5.267047  | 1.287248  | C   | -3.718350      | -3.894963 | 1.280819  |
| C   | -1.358547      | 6.469593  | 0.962384  | O   | -3.172892      | -4.723984 | 2.295598  |
| C   | -0.677861      | 6.295910  | -0.403627 | C   | -3.703571      | -4.570798 | -0.090794 |
| H   | -1.610230      | 3.948982  | -0.974535 | O   | -2.330307      | -4.634472 | -0.487004 |
| H   | -3.870335      | 5.788959  | -0.040916 | C   | -4.503788      | -3.766823 | -1.132090 |
| H   | -1.595672      | 4.386633  | 1.433797  | O   | -5.833659      | -3.479913 | -0.632446 |
| H   | -2.004800      | 7.356564  | 0.896849  | C   | -4.655094      | -4.491749 | -2.458931 |
| H   | -0.213919      | 7.235735  | -0.719029 | O   | -5.182069      | -5.794696 | -2.225911 |
| C   | -3.105457      | 4.384575  | -2.442846 | C   | -1.829148      | -5.828190 | -1.058637 |
| O   | -2.955039      | 5.560345  | 2.476418  | C   | -0.753087      | -6.410605 | -0.130404 |
| O   | -0.343017      | 6.673759  | 1.940824  | O   | -1.315094      | -6.592738 | 1.169464  |
| O   | 0.285911       | 5.279089  | -0.292438 | C   | 0.465625       | -5.496534 | -0.082708 |
| H   | -4.171502      | 4.273687  | -2.240228 | O   | 1.448227       | -6.150164 | 0.707637  |
| O   | -2.682003      | 3.140566  | -2.999860 | C   | 0.948983       | -5.201082 | -1.500594 |
| H   | -2.973653      | 5.203984  | -3.160973 | O   | 2.041716       | -4.282127 | -1.392950 |
| H   | -3.606594      | 4.845926  | 2.614400  | C   | -0.195150      | -4.609616 | -2.331986 |
| H   | -0.776211      | 6.649996  | 2.806769  | O   | -1.277559      | -5.573425 | -2.334287 |
| H   | -1.728643      | 3.194454  | -3.231679 | C   | 0.180211       | -4.295145 | -3.786766 |
| O   | 3.073464       | 4.591413  | -2.588768 | O   | 1.130352       | -5.188888 | -4.354677 |
| C   | 1.723775       | 4.450592  | -2.089883 | C   | 3.290271       | -4.676208 | -1.905327 |
| C   | 1.548545       | 5.452428  | -0.939112 | C   | 4.381260       | -4.342351 | -0.888760 |
| C   | 2.597674       | 5.206366  | 0.148447  | O   | 4.082804       | -4.994314 | 0.344739  |
| C   | 4.003023       | 5.190513  | -0.437897 | C   | 4.499061       | -2.836868 | -0.694335 |
| C   | 4.061765       | 4.238040  | -1.640550 | O   | 5.597027       | -2.629961 | 0.176151  |
| H   | 1.587272       | 3.439841  | -1.690177 | C   | 4.661327       | -2.105555 | -2.034357 |
| H   | 1.643953       | 6.477786  | -1.319647 | O   | 4.455433       | -0.708207 | -1.798368 |
| H   | 2.402115       | 4.213004  | 0.576792  | C   | 3.602630       | -2.577423 | -3.047889 |
| H   | 4.247043       | 6.199043  | -0.800588 | O   | 3.580873       | -4.019982 | -3.128289 |
| H   | 5.021453       | 4.331390  | -2.158672 | C   | 3.850339       | -2.077321 | -4.457834 |
| C   | 0.765892       | 4.617947  | -3.280838 | O   | 2.690629       | -2.379316 | -5.228466 |
| O   | 2.552494       | 6.200296  | 1.160201  | C   | 5.555269       | 0.179705  | -1.835588 |
| O   | 4.969319       | 4.763829  | 0.518869  | C   | 5.625381       | 0.971369  | -0.514865 |
| O   | 3.872346       | 2.924083  | -1.173244 | O   | 5.712665       | 0.039961  | 0.547956  |
| H   | -0.001060      | 5.360150  | -3.054820 | C   | 4.423909       | 1.908239  | -0.383017 |
| O   | 0.067201       | 3.415434  | -3.599156 | O   | 4.631045       | 2.739779  | 0.752646  |
| H   | 1.348926       | 4.976195  | -4.139278 | C   | 4.242090       | 2.745054  | -1.650601 |
| H   | 1.646309       | 6.209020  | 1.523038  | O   | 2.976690       | 3.405330  | -1.507129 |
| H   | 4.781560       | 5.247811  | 1.337268  | C   | 4.254195       | 1.873888  | -2.915767 |
| H   | 0.720190       | 2.707906  | -3.797328 | O   | 5.446383       | 1.064135  | -2.931800 |
| O   | 4.930928       | -0.039737 | -3.067875 | C   | 4.221530       | 2.681426  | -4.202522 |
| C   | 3.972204       | 0.970491  | -2.683198 | O   | 5.263183       | 3.655617  | -4.178286 |
| C   | 4.699639       | 1.877411  | -1.683112 | C   | 2.864740       | 4.765263  | -1.880204 |

|   |           |           |           |   |           |           |           |
|---|-----------|-----------|-----------|---|-----------|-----------|-----------|
| C | 5.108587  | 1.070008  | -0.443084 | C | 2.542926  | 5.605511  | -0.634085 |
| C | 5.924994  | -0.164266 | -0.826651 | O | 3.539817  | 5.360463  | 0.358274  |
| C | 5.259862  | -0.914382 | -2.004166 | C | 1.149007  | 5.282949  | -0.108130 |
| H | 3.125389  | 0.494487  | -2.176237 | O | 0.889582  | 6.172163  | 0.969059  |
| H | 5.593826  | 2.301429  | -2.158794 | C | 0.127415  | 5.409288  | -1.235604 |
| H | 4.177645  | 0.732340  | 0.039656  | O | -1.142915 | 5.027223  | -0.696657 |
| H | 6.901484  | 0.191250  | -1.187790 | C | 0.532969  | 4.509772  | -2.409005 |
| H | 5.966737  | -1.635554 | -2.426685 | O | 1.847211  | 4.934341  | -2.847225 |
| C | 3.427378  | 1.627967  | -3.964011 | C | -0.422708 | 4.566362  | -3.608663 |
| O | 5.869905  | 1.874431  | 0.444529  | O | -1.027878 | 5.836944  | -3.818080 |
| O | 6.121851  | -1.087447 | 0.235071  | H | -1.810689 | 6.960942  | -0.986524 |
| O | 4.110012  | -1.569054 | -1.529060 | H | -3.645944 | 6.780165  | 0.607852  |
| H | 3.588737  | 2.706328  | -3.951657 | H | -2.306506 | 6.078428  | 2.493298  |
| O | 2.018978  | 1.447932  | -4.114702 | H | -2.769807 | 3.890633  | 1.001708  |
| H | 3.971500  | 1.206339  | -4.818888 | H | -4.755098 | 3.984552  | 2.315877  |
| H | 5.405506  | 2.728601  | 0.542117  | H | -5.368538 | 4.896544  | -0.224757 |
| H | 5.864437  | -0.718705 | 1.126474  | H | -2.963602 | 3.579093  | -1.593179 |
| H | 1.817048  | 0.487028  | -4.159438 | H | -5.337092 | 5.006037  | -2.853646 |
| O | 2.390376  | -4.431617 | -3.056199 | H | -5.239331 | 3.239848  | -2.641611 |
| C | 2.591801  | -3.027757 | -2.773117 | H | -4.367397 | 4.030311  | -4.711455 |
| C | 3.875328  | -2.914705 | -1.941524 | H | -6.855810 | 3.382465  | -0.068103 |
| C | 3.750591  | -3.728886 | -0.652491 | H | -7.571713 | 1.623635  | 1.467732  |
| C | 3.345259  | -5.167253 | -0.952842 | H | -6.157494 | 2.216480  | 3.303013  |
| C | 2.137119  | -5.207622 | -1.899774 | H | -4.650249 | 0.760885  | 1.570283  |
| H | 1.752028  | -2.652732 | -2.177708 | H | -5.643256 | -0.912882 | 2.873503  |
| H | 4.723936  | -3.285793 | -2.531394 | H | -7.081783 | -0.625408 | 0.347671  |
| H | 2.955492  | -3.266386 | -0.047854 | H | -4.659814 | 0.682781  | -0.981529 |
| H | 4.181318  | -5.662204 | -1.466452 | H | -5.143487 | -0.981236 | -2.487949 |
| H | 1.969853  | -6.227962 | -2.259194 | H | -6.219268 | 0.308958  | -3.028063 |
| C | 2.596712  | -2.270504 | -4.112276 | H | -6.872916 | -2.094274 | -1.748098 |
| O | 4.974759  | -3.756519 | 0.065433  | H | -6.908263 | -2.625649 | 0.837804  |
| O | 3.003523  | -5.885793 | 0.231676  | H | -5.702076 | -4.510911 | 1.806257  |
| O | 1.011768  | -4.735404 | -1.201504 | H | -4.591852 | -3.247168 | 3.519851  |
| H | 3.521672  | -1.703016 | -4.228855 | H | -3.154190 | -2.953669 | 1.201744  |
| O | 1.537848  | -1.320057 | -4.211656 | H | -2.400579 | -5.198272 | 1.926116  |
| H | 2.541928  | -3.009783 | -4.921953 | H | -4.125982 | -5.577035 | -0.003429 |
| H | 5.296557  | -2.831778 | 0.146291  | H | -3.977973 | -2.822187 | -1.316119 |
| H | 3.753870  | -5.805327 | 0.838498  | H | -3.666600 | -4.538658 | -2.932553 |
| H | 0.678261  | -1.786072 | -4.112193 | H | -5.318014 | -3.900893 | -3.106786 |
| O | -2.482434 | -5.281636 | -2.219377 | H | -5.178376 | -6.267211 | -3.068682 |
| C | -1.239960 | -4.542673 | -2.175812 | H | -2.640346 | -6.543714 | -1.220768 |
| C | -0.238947 | -5.399320 | -1.385227 | H | -0.445430 | -7.382752 | -0.539732 |
| C | -0.774048 | -5.652823 | 0.028033  | H | -0.582615 | -6.854372 | 1.748427  |
| C | -2.170518 | -6.263558 | -0.025637 | H | 0.170963  | -4.544221 | 0.382306  |
| C | -3.083895 | -5.443543 | -0.948645 | H | 2.270412  | -5.621096 | 0.680453  |
| H | -1.395051 | -3.601837 | -1.636071 | H | 1.283629  | -6.124727 | -1.984916 |
| H | -0.087428 | -6.356817 | -1.901097 | H | -0.555353 | -3.685319 | -1.864350 |
| H | -0.837794 | -4.681532 | 0.540667  | H | 0.546337  | -3.265617 | -3.842908 |
| H | -2.089153 | -7.272232 | -0.454942 | H | -0.742019 | -4.349011 | -4.377077 |
| H | -4.021110 | -5.979234 | -1.129844 | H | 1.994656  | -4.749140 | -4.281876 |
| C | -0.853869 | -4.191383 | -3.623378 | H | 3.294732  | -5.744883 | -2.139176 |
| O | 0.064642  | -6.541211 | 0.754804  | H | 5.331675  | -4.721031 | -1.290080 |
| O | -2.782525 | -6.324445 | 1.259728  | H | 4.682314  | -4.611991 | 1.004238  |
| O | -3.329072 | -4.201283 | -0.338794 | H | 3.564419  | -2.474991 | -0.241311 |
| H | 0.151990  | -4.544991 | -3.853162 | H | 5.651008  | -1.664237 | 0.367558  |
| O | -0.838921 | -2.784326 | -3.860830 | H | 5.670536  | -2.284481 | -2.428686 |
| H | -1.559446 | -4.697537 | -4.294766 | H | 2.622719  | -2.219585 | -2.710471 |
| H | 0.976474  | -6.196564 | 0.700232  | H | 4.742786  | -2.576450 | -4.861307 |
| H | -2.146445 | -6.744677 | 1.856932  | H | 4.047101  | -0.998398 | -4.421717 |
| H | -1.734582 | -2.417206 | -3.688631 | H | 2.879709  | -2.166799 | -6.151846 |
| O | -6.091337 | -1.930000 | -1.208252 | H | 6.487695  | -0.372500 | -1.990597 |
| C | -4.742423 | -2.440597 | -1.316515 | H | 6.533486  | 1.590686  | -0.560795 |
| C | -4.649022 | -3.659025 | -0.385343 | H | 5.709525  | 0.449604  | 1.461902  |
| C | -4.962858 | -3.239556 | 1.054169  | H | 3.521251  | 1.293296  | -0.250917 |
| C | -6.312050 | -2.533495 | 1.127994  | H | 4.119720  | 3.565512  | 0.629891  |
| C | -6.398380 | -1.418779 | 0.075290  | H | 5.050051  | 3.481556  | -1.713706 |
| H | -4.036167 | -1.679748 | -0.965713 | H | 3.370945  | 1.222928  | -2.905766 |
| H | -5.363221 | -4.426915 | -0.710830 | H | 3.235356  | 3.155910  | -4.281168 |
| H | -4.182759 | -2.529483 | 1.369034  | H | 4.340358  | 1.990535  | -5.048640 |
| H | -7.097419 | -3.266684 | 0.895075  | H | 5.164355  | 4.208160  | -4.964722 |
| H | -7.422740 | -1.039296 | 0.005609  | H | 3.787820  | 5.106336  | -2.357461 |
| C | -4.456381 | -2.691526 | -2.806984 | H | 2.566626  | 6.664230  | -0.927468 |

|            |                |           |           |            |                |           |           |
|------------|----------------|-----------|-----------|------------|----------------|-----------|-----------|
| O          | -5.006612      | -4.354906 | 1.929944  | H          | 3.222496       | 5.780327  | 1.172857  |
| O          | -6.544588      | -1.955881 | 2.409886  | H          | 1.137744       | 4.240584  | 0.243614  |
| H          | -4.108107      | -3.712612 | -2.967291 | H          | -0.044694      | 6.066523  | 1.241704  |
| O          | -3.430124      | -1.843982 | -3.321531 | H          | 0.085585       | 6.443596  | -1.593514 |
| H          | -5.394614      | -2.555880 | -3.360351 | H          | 0.599344       | 3.467670  | -2.073455 |
| H          | -4.173173      | -4.850471 | 1.817222  | H          | -1.190272      | 3.796350  | -3.486970 |
| H          | -6.326354      | -2.634599 | 3.065912  | H          | 0.162794       | 4.309764  | -4.499412 |
| H          | -3.693294      | -0.903875 | -3.204678 | H          | -1.915125      | 5.783455  | -3.423796 |
| C          | 0.006255       | 2.551476  | 3.654645  | C          | 0.073557       | 3.185422  | 4.538074  |
| C          | 0.756366       | 2.529685  | 2.479225  | C          | 0.872670       | 3.412948  | 3.417312  |
| C          | 1.723794       | 1.541665  | 2.299988  | C          | 1.869287       | 2.495241  | 3.089822  |
| C          | 1.971559       | 0.563163  | 3.274602  | C          | 2.105876       | 1.348818  | 3.866290  |
| C          | 1.193093       | 0.571180  | 4.449569  | C          | 1.289443       | 1.116214  | 4.989077  |
| C          | 0.223176       | 1.568763  | 4.619505  | C          | 0.281626       | 2.039330  | 5.303083  |
| C          | 1.301964       | -0.545183 | 5.472448  | C          | 1.417789       | -0.151862 | 5.811422  |
| C          | 0.993436       | -1.867062 | 4.809389  | C          | 1.245301       | -1.368561 | 4.934669  |
| C          | -0.192536      | -2.564068 | 5.041880  | C          | 0.099762       | -2.164625 | 4.982129  |
| C          | -0.456098      | -3.774328 | 4.393175  | C          | -0.029728      | -3.295085 | 4.169633  |
| C          | 0.478278       | -4.289381 | 3.495460  | C          | 1.009346       | -3.634133 | 3.304423  |
| C          | 1.667185       | -3.597754 | 3.244670  | C          | 2.152116       | -2.833151 | 3.226923  |
| C          | 1.935770       | -2.382685 | 3.892471  | C          | 2.278158       | -1.685600 | 4.025369  |
| C          | 3.136448       | -0.389326 | 2.995000  | C          | 3.308843       | 0.500644  | 3.440385  |
| N          | 3.157397       | -1.669643 | 3.737161  | N          | 3.439265       | -0.858067 | 4.026059  |
| C          | 4.457802       | 0.360157  | 3.277794  | C          | 4.587319       | 1.304100  | 3.761988  |
| C          | 4.318463       | -2.474200 | 3.346580  | C          | 4.658415       | -1.516714 | 3.540003  |
| C          | 5.610353       | -1.722245 | 3.641361  | C          | 5.901200       | -0.693954 | 3.857928  |
| N          | 5.639815       | -0.439749 | 2.922707  | N          | 5.792798       | 0.639611  | 3.250669  |
| C          | 6.875297       | 0.299164  | 3.215090  | C          | 6.990084       | 1.449344  | 3.498125  |
| H          | -0.752184      | 3.313817  | 3.809557  | H          | -0.710120      | 3.886824  | 4.809469  |
| H          | 0.588318       | 3.271763  | 1.705049  | H          | 0.733319       | 4.299938  | 2.806474  |
| H          | 2.303142       | 1.531121  | 1.379900  | H          | 2.496442       | 2.675245  | 2.220639  |
| H          | -0.377763      | 1.562246  | 5.525090  | H          | -0.350316      | 1.846601  | 6.166276  |
| H          | 0.606909       | -0.359092 | 6.295525  | H          | 0.668384       | -0.148910 | 6.607545  |
| H          | 2.316337       | -0.582619 | 5.887503  | H          | 2.407674       | -0.193728 | 6.282255  |
| H          | -0.912311      | -2.159622 | 5.749196  | H          | -0.694076      | -1.902996 | 5.677440  |
| H          | -1.381400      | -4.307607 | 4.590046  | H          | -0.932436      | -3.897793 | 4.206970  |
| H          | 0.285223       | -5.221774 | 2.972388  | H          | 0.944379       | -4.522940 | 2.683623  |
| H          | 2.376030       | -4.010566 | 2.535029  | H          | 2.937856       | -3.112213 | 2.534376  |
| H          | 3.115040       | -0.612518 | 1.912168  | H          | 3.262217       | 0.405254  | 2.341535  |
| H          | 4.477798       | 0.639436  | 4.345851  | H          | 4.650108       | 1.449362  | 4.854834  |
| H          | 4.486559       | 1.278549  | 2.686720  | H          | 4.517155       | 2.280916  | 3.283476  |
| H          | 4.300995       | -2.751729 | 2.280906  | H          | 4.629204       | -1.698027 | 2.454639  |
| H          | 4.306889       | -3.399767 | 3.928308  | H          | 4.740662       | -2.489017 | 4.033662  |
| H          | 6.465814       | -2.324199 | 3.317567  | H          | 6.781930       | -1.199927 | 3.449247  |
| H          | 5.701801       | -1.560294 | 4.729254  | H          | 6.030928       | -0.615152 | 4.951073  |
| H          | 6.964034       | 0.552059  | 4.283951  | H          | 7.160955       | 1.627608  | 4.572021  |
| H          | 6.889644       | 1.215279  | 2.622299  | H          | 6.882671       | 2.414058  | 2.995579  |
| H          | 7.736000       | -0.313917 | 2.932559  | H          | 7.865753       | 0.938102  | 3.088371  |
| <b>FV1</b> |                |           |           | <b>FV1</b> |                |           |           |
| E          | -5082.94064844 |           |           | E          | -5082.92409006 |           |           |
| O          | 6.619483       | -2.732162 | 0.005380  | C          | 1.060547       | -4.987055 | -2.452766 |
| C          | 5.251505       | -3.076631 | 0.324627  | C          | 1.958965       | -5.246760 | -1.240108 |
| C          | 4.852637       | -4.232649 | -0.605225 | O          | 1.132759       | -5.596372 | -0.131260 |
| C          | 4.979654       | -3.793160 | -2.067212 | C          | 2.828343       | -4.032839 | -0.931167 |
| C          | 6.379455       | -3.258234 | -2.347925 | O          | 3.734580       | -4.415744 | 0.090977  |
| C          | 6.778014       | -2.208774 | -1.300102 | C          | 3.556551       | -3.516626 | -2.181584 |
| H          | 4.601862       | -2.219859 | 0.113398  | O          | 4.088646       | -2.241632 | -1.806039 |
| H          | 5.507181       | -5.094805 | -0.420468 | C          | 2.567595       | -3.365503 | -3.349227 |
| H          | 4.257879       | -2.978342 | -2.231875 | O          | 1.865357       | -4.603994 | -3.549285 |
| H          | 7.089889       | -4.093004 | -2.263612 | C          | 3.198643       | -3.018243 | -4.683106 |
| H          | 7.840462       | -1.962308 | -1.393208 | O          | 2.127884       | -2.732985 | -5.588658 |
| C          | 5.180386       | -3.354793 | 1.836151  | C          | 5.434870       | -1.912393 | -2.072993 |
| O          | 3.484806       | -4.607497 | -0.441470 | C          | 6.141111       | -1.594067 | -0.746279 |
| O          | 4.735456       | -4.865915 | -2.962858 | O          | 6.032944       | -2.722104 | 0.121155  |
| O          | 6.476044       | -2.660152 | -3.637797 | C          | 5.542056       | -0.344211 | -0.111113 |
| O          | 5.982527       | -1.065576 | -1.490753 | O          | 6.299579       | -0.056864 | 1.054102  |
| H          | 4.751175       | -4.338762 | 2.029385  | C          | 5.560859       | 0.801558  | -1.121000 |
| O          | 4.349713       | -2.423491 | 2.528117  | O          | 4.897224       | 1.914446  | -0.511721 |
| H          | 6.203904       | -3.340999 | 2.232393  | C          | 4.850088       | 0.386337  | -2.414983 |
| H          | 3.873792       | -5.258403 | -2.724669 | O          | 5.513882       | -0.792057 | -2.932950 |
| H          | 6.071544       | -3.279170 | -4.263739 | C          | 4.853502       | 1.468690  | -3.503470 |
| H          | 4.697595       | -1.513960 | 2.393499  | O          | 6.021308       | 2.280182  | -3.531930 |



|   |           |           |           |   |           |           |           |
|---|-----------|-----------|-----------|---|-----------|-----------|-----------|
| O | 6.775268  | 2.290145  | -0.205013 | C | 5.611961  | 3.114497  | -0.351814 |
| C | 6.158259  | 0.983577  | -0.139597 | C | 5.388626  | 3.640631  | 1.067146  |
| C | 6.594928  | 0.220738  | -1.399417 | O | 5.830594  | 2.648114  | 1.990962  |
| C | 6.137055  | 0.976947  | -2.650376 | C | 3.922530  | 3.991668  | 1.279773  |
| C | 6.639433  | 2.416189  | -2.621560 | O | 3.811786  | 4.561084  | 2.573263  |
| C | 6.303451  | 3.081960  | -1.279070 | C | 3.437721  | 4.943073  | 0.186247  |
| H | 5.068300  | 1.094707  | -0.159722 | O | 2.015844  | 5.014324  | 0.333308  |
| H | 7.688397  | 0.121477  | -1.407716 | C | 3.787771  | 4.427467  | -1.222383 |
| H | 5.036246  | 0.993627  | -2.643083 | O | 5.195734  | 4.089145  | -1.299514 |
| H | 7.734734  | 2.399108  | -2.714379 | C | 3.495216  | 5.440911  | -2.315903 |
| H | 6.822911  | 4.041428  | -1.190260 | O | 4.136817  | 6.672776  | -1.998959 |
| C | 6.538071  | 0.354332  | 1.212053  | C | 1.371308  | 6.271808  | 0.286624  |
| O | 6.620279  | 0.370576  | -3.838343 | C | 0.673635  | 6.527050  | 1.631967  |
| O | 6.070894  | 3.203776  | -3.664260 | O | 1.629441  | 6.423087  | 2.687065  |
| O | 4.910974  | 3.261185  | -1.206481 | C | -0.473774 | 5.545320  | 1.835133  |
| H | 6.995791  | -0.625307 | 1.068879  | O | -1.129803 | 5.913232  | 3.041683  |
| O | 5.406844  | 0.137257  | 2.054441  | C | -1.407796 | 5.572767  | 0.625162  |
| H | 7.271830  | 1.010489  | 1.697676  | O | -2.413277 | 4.573174  | 0.822333  |
| H | 6.371867  | -0.573231 | -3.809747 | C | -0.613998 | 5.296168  | -0.656229 |
| H | 6.160314  | 2.691992  | -4.481960 | O | 0.420998  | 6.304962  | -0.758596 |
| H | 4.959673  | 0.995568  | 2.226506  | C | -1.444180 | 5.330372  | -1.939748 |
| O | 3.214999  | 5.600853  | 1.072333  | O | -2.382221 | 6.394955  | -1.983808 |
| C | 3.750059  | 4.311587  | 0.693458  | C | -3.695782 | 5.031934  | 1.178023  |
| C | 4.404168  | 4.489690  | -0.684968 | C | -4.278479 | 4.128624  | 2.267802  |
| C | 3.357140  | 4.960160  | -1.699152 | O | -3.355606 | 4.080001  | 3.356015  |
| C | 2.659227  | 6.222069  | -1.204013 | C | -4.577533 | 2.732531  | 1.731329  |
| C | 2.160417  | 6.040129  | 0.237155  | O | -5.269329 | 2.036686  | 2.755723  |
| H | 2.930054  | 3.590615  | 0.600860  | C | -5.370730 | 2.773362  | 0.415609  |
| H | 5.210204  | 5.232042  | -0.614253 | O | -5.307105 | 1.444259  | -0.115023 |
| H | 2.604894  | 4.161676  | -1.793023 | C | -4.718241 | 3.761465  | -0.564791 |
| H | 3.394677  | 7.039202  | -1.195195 | O | -4.571075 | 5.043529  | 0.068343  |
| H | 1.836735  | 7.000825  | 0.649984  | C | -5.495294 | 4.004494  | -1.843061 |
| C | 4.666518  | 3.832108  | 1.832407  | O | -4.638886 | 4.748549  | -2.716385 |
| O | 3.938179  | 5.251091  | -2.960177 | C | -6.482576 | 0.748164  | -0.470667 |
| O | 1.545280  | 6.573821  | -2.020214 | C | -6.558672 | -0.553107 | 0.338149  |
| O | 1.098245  | 5.118988  | 0.230257  | O | -6.577484 | -0.241248 | 1.732215  |
| H | 5.661457  | 3.593050  | 1.454796  | C | -5.381607 | -1.457403 | -0.004164 |
| O | 4.189229  | 2.641365  | 2.457399  | O | -5.554011 | -2.664500 | 0.724674  |
| H | 4.760317  | 4.649185  | 2.559318  | C | -5.308136 | -1.686974 | -1.511610 |
| H | 4.460364  | 4.471896  | -3.231240 | O | -4.058725 | -2.344850 | -1.751526 |
| H | 1.848595  | 6.534836  | -2.939465 | C | -5.357286 | -0.354279 | -2.282615 |
| H | 3.294603  | 2.807270  | 2.829390  | O | -6.485867 | 0.436245  | -1.848210 |
| O | -1.378380 | 4.758227  | 2.930262  | C | -5.474773 | -0.542817 | -3.785534 |
| C | -0.149156 | 4.434409  | 2.240268  | O | -6.584180 | -1.391602 | -4.070322 |
| C | -0.045763 | 5.389196  | 1.040649  | C | -4.019908 | -3.475126 | -2.598723 |
| C | -1.253208 | 5.192923  | 0.118128  | C | -3.545472 | -4.693205 | -1.790296 |
| C | -2.552147 | 5.367194  | 0.897074  | O | -4.395155 | -4.869468 | -0.656653 |
| C | -2.537275 | 4.492541  | 2.161027  | C | -2.092775 | -4.519538 | -1.364537 |
| H | -0.204426 | 3.407292  | 1.862995  | O | -1.708048 | -5.716124 | -0.701235 |
| H | -0.018542 | 6.426632  | 1.399688  | C | -1.227989 | -4.210664 | -2.587028 |
| H | -1.214701 | 4.161947  | -0.265467 | O | 0.112162  | -3.997204 | -2.131008 |
| H | -2.623340 | 6.415828  | 1.219697  | C | -1.776065 | -2.968467 | -3.300803 |
| H | -3.385909 | 4.738354  | 2.807252  | O | -3.143764 | -3.253820 | -3.685019 |
| C | 0.993601  | 4.490110  | 3.268742  | C | -1.005127 | -2.552101 | -4.552932 |
| O | -1.258107 | 6.122462  | -0.954002 | O | -0.613861 | -3.643630 | -5.371974 |
| O | -3.695875 | 5.015914  | 0.122587  | H | 0.564062  | -5.912175 | -2.759751 |
| O | -2.581871 | 3.146260  | 1.765378  | H | 2.616822  | -6.088081 | -1.498255 |
| H | 1.780553  | 5.170238  | 2.940217  | H | 1.707654  | -5.691401 | 0.641837  |
| O | 1.624428  | 3.223379  | 3.455860  | H | 2.170200  | -3.221422 | -0.585913 |
| H | 0.581924  | 4.868779  | 4.213167  | H | 4.420463  | -3.721752 | 0.172387  |
| H | -0.384345 | 6.077599  | -1.387676 | H | 4.365040  | -4.209240 | -2.449615 |
| H | -3.550457 | 5.350850  | -0.774916 | H | 1.853839  | -2.575523 | -3.086482 |
| H | 0.954507  | 2.568212  | 3.752035  | H | 3.799946  | -3.866600 | -5.036001 |
| O | -3.596277 | 0.301069  | 3.847315  | H | 3.853566  | -2.146966 | -4.561928 |
| C | -2.633800 | 1.210480  | 3.266792  | H | 2.492873  | -2.634391 | -6.477885 |
| C | -3.435669 | 2.241733  | 2.465696  | H | 5.941244  | -2.731452 | -2.593255 |
| C | -4.260899 | 1.552925  | 1.373510  | H | 7.199413  | -1.401092 | -0.969824 |
| C | -5.097128 | 0.406767  | 1.931473  | H | 6.353543  | -2.428866 | 0.987943  |
| C | -4.269519 | -0.482367 | 2.879735  | H | 4.494243  | -0.551987 | 0.150193  |
| H | -1.981930 | 0.659761  | 2.579715  | H | 5.974656  | 0.784825  | 1.431872  |
| H | -4.104220 | 2.791970  | 3.140590  | H | 6.595792  | 1.067975  | -1.362623 |
| H | -3.547844 | 1.141762  | 0.642868  | H | 3.807290  | 0.128564  | -2.195483 |

|   |           |           |           |   |           |           |           |
|---|-----------|-----------|-----------|---|-----------|-----------|-----------|
| H | -5.911775 | 0.843844  | 2.525880  | H | 3.954435  | 2.082763  | -3.380075 |
| H | -4.932677 | -1.143513 | 3.446629  | H | 4.772076  | 0.962125  | -4.470875 |
| C | -1.753335 | 1.765819  | 4.400080  | H | 5.848982  | 3.039518  | -2.949776 |
| O | -5.141891 | 2.474054  | 0.751553  | H | 6.679090  | 2.961686  | -0.539068 |
| O | -5.636826 | -0.429204 | 0.908291  | H | 5.989323  | 4.553463  | 1.182303  |
| O | -3.359308 | -1.231990 | 2.114366  | H | 5.487117  | 2.904610  | 2.860253  |
| H | -1.777054 | 2.856707  | 4.408451  | H | 3.331116  | 3.066359  | 1.207492  |
| O | -0.379871 | 1.406566  | 4.256003  | H | 2.949663  | 5.020611  | 2.634602  |
| H | -2.158271 | 1.404922  | 5.354426  | H | 3.890290  | 5.928578  | 0.336128  |
| H | -4.601688 | 3.197224  | 0.378915  | H | 3.191941  | 3.528292  | -1.419397 |
| H | -5.855519 | 0.099128  | 0.113891  | H | 2.406586  | 5.561414  | -2.380018 |
| H | -0.299194 | 0.426925  | 4.267948  | H | 3.852493  | 5.037397  | -3.273863 |
| O | -1.692881 | -4.319825 | 3.216851  | H | 3.853134  | 7.327020  | -2.650787 |
| C | -1.785532 | -2.891004 | 3.013393  | H | 2.092303  | 7.062809  | 0.060171  |
| C | -3.177735 | -2.612669 | 2.428804  | H | 0.261638  | 7.545696  | 1.605478  |
| C | -3.349828 | -3.362531 | 1.104567  | H | 1.111921  | 6.400153  | 3.507857  |
| C | -3.065446 | -4.849428 | 1.290073  | H | -0.055087 | 4.532153  | 1.919875  |
| C | -1.726937 | -5.062411 | 2.012335  | H | -1.771380 | 5.211624  | 3.263831  |
| H | -1.030424 | -2.577574 | 2.283808  | H | -1.874091 | 6.558655  | 0.525556  |
| H | -3.945297 | -2.943113 | 3.141347  | H | -0.136295 | 4.310307  | -0.594009 |
| H | -2.613942 | -2.954616 | 0.394575  | H | -1.948195 | 4.364586  | -2.044573 |
| H | -3.853504 | -5.271588 | 1.929934  | H | -0.737522 | 5.420708  | -2.776819 |
| H | -1.618059 | -6.110687 | 2.308149  | H | -3.264067 | 5.985282  | -2.050423 |
| C | -1.458115 | -2.204103 | 4.350576  | H | -3.651424 | 6.066200  | 1.530631  |
| O | -4.666632 | -3.228821 | 0.591983  | H | -5.223229 | 4.584007  | 2.594818  |
| O | -3.016031 | -5.546668 | 0.048103  | H | -3.745606 | 3.520301  | 4.042780  |
| O | -0.687035 | -4.679047 | 1.147421  | H | -3.618448 | 2.241916  | 1.507276  |
| H | -2.263055 | -1.529710 | 4.645973  | H | -5.629763 | 1.205549  | 2.382137  |
| O | -0.280125 | -1.401874 | 4.283236  | H | -6.411007 | 3.060599  | 0.617102  |
| H | -1.361910 | -2.983149 | 5.117865  | H | -3.730491 | 3.366625  | -0.831393 |
| H | -4.901551 | -2.280082 | 0.618698  | H | -6.410923 | 4.565334  | -1.613975 |
| H | -3.802002 | -5.283516 | -0.453235 | H | -5.773144 | 3.042901  | -2.290984 |
| H | 0.482035  | -1.967392 | 4.026668  | H | -5.154541 | 5.042849  | -3.478732 |
| O | 2.835471  | -5.679187 | 1.521065  | H | -7.368704 | 1.367119  | -0.297431 |
| C | 1.703756  | -4.800517 | 1.719823  | H | -7.492269 | -1.062542 | 0.063883  |
| C | 0.486317  | -5.490279 | 1.085733  | H | -6.444410 | -1.078498 | 2.203209  |
| C | 0.739151  | -5.725438 | -0.406625 | H | -4.454656 | -0.953046 | 0.304022  |
| C | 2.036920  | -6.498045 | -0.615670 | H | -4.995633 | -3.357070 | 0.314168  |
| C | 3.188832  | -5.842896 | 0.160356  | H | -6.142193 | -2.321959 | -1.827788 |
| H | 1.881210  | -3.854722 | 1.195707  | H | -4.431407 | 0.198595  | -2.082487 |
| H | 0.308568  | -6.451668 | 1.585657  | H | -4.535572 | -0.981948 | -4.144896 |
| H | 0.841615  | -4.739291 | -0.885152 | H | -5.594823 | 0.444882  | -4.251970 |
| H | 1.902622  | -7.511126 | -0.210358 | H | -6.571690 | -1.580387 | -5.017690 |
| H | 4.067537  | -6.495591 | 0.158832  | H | -5.004088 | -3.655251 | -3.041165 |
| C | 1.611502  | -4.490667 | 3.224060  | H | -3.615112 | -5.574855 | -2.442747 |
| O | -0.310741 | -6.466311 | -1.008041 | H | -3.947457 | -5.516758 | -0.088867 |
| O | 2.406261  | -6.564704 | -1.990381 | H | -2.029273 | -3.663489 | -0.676965 |
| H | 0.621568  | -4.736548 | 3.610368  | H | -0.800366 | -5.599347 | -0.360145 |
| O | 1.811826  | -3.107879 | 3.513790  | H | -1.253325 | -5.046016 | -3.294717 |
| H | 2.349940  | -5.113970 | 3.744654  | H | -1.778277 | -2.114182 | -2.612108 |
| H | -1.149330 | -6.012978 | -0.797399 | H | -0.132065 | -1.972241 | -4.239037 |
| H | 1.614673  | -6.833639 | -2.479895 | H | -1.658456 | -1.873980 | -5.120098 |
| H | 2.699144  | -2.833458 | 3.191504  | H | 0.359124  | -3.618894 | -5.413651 |
| C | -4.123734 | -2.864477 | -5.084645 | C | -1.462712 | -6.266932 | 5.415019  |
| C | -5.463645 | -2.736946 | -5.451031 | C | -0.515132 | -5.841809 | 6.346003  |
| C | -6.296832 | -1.895939 | -4.716958 | C | 0.344589  | -4.794614 | 6.018760  |
| C | -5.830892 | -1.173460 | -3.605953 | C | 0.290068  | -4.154822 | 4.770845  |
| C | -4.472264 | -1.284218 | -3.255557 | C | -0.683474 | -4.570574 | 3.841502  |
| C | -3.641001 | -2.131271 | -4.002596 | C | -1.544794 | -5.622796 | 4.181215  |
| C | -3.867276 | -0.436082 | -2.153502 | C | -0.888711 | -3.827457 | 2.534147  |
| C | -4.088970 | 1.031744  | -2.438638 | C | -1.209377 | -2.378707 | 2.819808  |
| C | -3.033627 | 1.869082  | -2.806294 | C | -2.487675 | -1.846224 | 2.645664  |
| C | -3.245524 | 3.218660  | -3.102332 | C | -2.752792 | -0.502580 | 2.930548  |
| C | -4.540220 | 3.731733  | -3.045759 | C | -1.724918 | 0.318417  | 3.391882  |
| C | -5.609039 | 2.906722  | -2.684790 | C | -0.443453 | -0.203471 | 3.585821  |
| C | -5.398258 | 1.557099  | -2.370086 | C | -0.173312 | -1.553600 | 3.313601  |
| C | -6.895270 | -0.371494 | -2.854894 | C | 1.370622  | -3.105442 | 4.510813  |
| N | -6.447338 | 0.693143  | -1.908369 | N | 1.125147  | -2.121431 | 3.430571  |
| C | -7.815148 | -1.339347 | -2.080955 | C | 2.700565  | -3.832234 | 4.211818  |
| C | -7.639147 | 1.399730  | -1.393666 | C | 2.246430  | -1.181756 | 3.330276  |
| C | -8.577878 | 0.439427  | -0.669113 | C | 3.540604  | -1.930289 | 3.032262  |
| N | -8.987572 | -0.645679 | -1.556709 | N | 3.813182  | -2.894373 | 4.095995  |

|   |                |           |           |   |                |           |           |
|---|----------------|-----------|-----------|---|----------------|-----------|-----------|
| C | -9.910478      | -1.564001 | -0.900472 | C | 5.079230       | -3.588683 | 3.892914  |
| H | -3.457014      | -3.513640 | -5.644447 | H | -2.142284      | -7.080513 | 5.651140  |
| H | -5.858149      | -3.281386 | -6.303655 | H | -0.446371      | -6.315791 | 7.320555  |
| H | -7.338627      | -1.795216 | -5.011559 | H | 1.080443       | -4.463711 | 6.747854  |
| H | -2.591791      | -2.204874 | -3.728751 | H | -2.298702      | -5.932580 | 3.462075  |
| H | -2.795690      | -0.642093 | -2.084583 | H | -1.698056      | -4.296873 | 1.967987  |
| H | -4.308530      | -0.699370 | -1.187100 | H | 0.018186       | -3.880799 | 1.919743  |
| H | -2.028940      | 1.456863  | -2.852090 | H | -3.285500      | -2.480599 | 2.266770  |
| H | -2.409896      | 3.857679  | -3.371146 | H | -3.750304      | -0.099299 | 2.795659  |
| H | -4.729627      | 4.773726  | -3.288557 | H | -1.917970      | 1.366754  | 3.603231  |
| H | -6.606131      | 3.328350  | -2.646044 | H | 0.343535       | 0.443845  | 3.956842  |
| H | -7.524351      | 0.110401  | -3.623046 | H | 1.518213       | -2.555240 | 5.458048  |
| H | -7.219845      | -1.827991 | -1.284929 | H | 2.568601       | -4.434438 | 3.291639  |
| H | -8.155131      | -2.124890 | -2.761726 | H | 2.913453       | -4.526112 | 5.030755  |
| H | -8.197937      | 1.885312  | -2.209951 | H | 2.381897       | -0.599459 | 4.258471  |
| H | -7.296345      | 2.168050  | -0.697693 | H | 2.036685       | -0.479267 | 2.519450  |
| H | -9.468176      | 0.994295  | -0.351889 | H | 4.370146       | -1.216835 | 2.969578  |
| H | -8.086886      | 0.055388  | 0.243588  | H | 3.453411       | -2.428935 | 2.048749  |
| H | -9.470096      | -2.067907 | -0.020047 | H | 5.104930       | -4.178711 | 2.957979  |
| H | -10.229993     | -2.336085 | -1.607493 | H | 5.265726       | -4.272410 | 4.727205  |
| H | -10.798026     | -1.016920 | -0.566978 | H | 5.896852       | -2.861128 | 3.860755  |
| S |                |           |           | S |                |           |           |
| E | -5082.93870703 |           |           | E | -5082.92246450 |           |           |
| O | -3.384239      | -2.359146 | 0.734545  | C | 0.104051       | 5.698390  | -0.287328 |
| C | -2.775689      | -1.053328 | 0.596557  | C | 0.888440       | 6.056993  | -1.552637 |
| C | -3.550790      | -0.325710 | -0.511729 | O | 0.123191       | 5.668589  | -2.690523 |
| C | -3.437580      | -1.109125 | -1.823507 | C | 2.258914       | 5.388410  | -1.543114 |
| C | -3.892557      | -2.553304 | -1.631380 | O | 2.969696       | 5.873802  | -2.668448 |
| C | -3.208606      | -3.180174 | -0.407743 | C | 3.008558       | 5.650531  | -0.228115 |
| H | -1.733990      | -1.171621 | 0.278494  | O | 4.131217       | 4.762237  | -0.249766 |
| H | -4.605167      | -0.245009 | -0.219465 | C | 2.099553       | 5.342851  | 0.973679  |
| H | -2.376028      | -1.114418 | -2.115694 | O | 0.864762       | 6.068329  | 0.845067  |
| H | -4.976433      | -2.557461 | -1.449863 | C | 2.668908       | 5.718715  | 2.327128  |
| H | -3.677443      | -4.137081 | -0.158017 | O | 1.786956       | 5.172612  | 3.313674  |
| C | -2.765107      | -0.389413 | 1.984860  | C | 5.426154       | 5.239818  | 0.041081  |
| O | -3.024441      | 0.970605  | -0.793264 | C | 6.348632       | 4.935289  | -1.149589 |
| O | -4.229195      | -0.533126 | -2.852368 | O | 5.797279       | 5.518439  | -2.329427 |
| O | -3.589680      | -3.364628 | -2.766308 | C | 6.541419       | 3.431928  | -1.313642 |
| O | -1.844840      | -3.354173 | -0.700316 | O | 7.498737       | 3.242833  | -2.343123 |
| H | -3.280127      | 0.571609  | 1.961747  | C | 6.984477       | 2.817756  | 0.012550  |
| O | -1.444318      | -0.113784 | 2.449421  | O | 7.038404       | 1.399062  | -0.176091 |
| H | -3.297508      | -1.049856 | 2.681317  | C | 6.001395       | 3.183426  | 1.130050  |
| H | -4.030830      | 0.422579  | -2.881324 | O | 5.938170       | 4.627876  | 1.210215  |
| H | -3.943322      | -2.906938 | -3.542899 | C | 6.390197       | 2.631951  | 2.508619  |
| H | -0.942102      | -0.956343 | 2.513878  | O | 7.790305       | 2.573629  | 2.752529  |
| O | 0.467127       | -5.595995 | 1.077557  | C | 8.261980       | 0.741085  | 0.037234  |
| C | -0.178071      | -4.327923 | 0.818241  | C | 8.518478       | -0.222846 | -1.122675 |
| C | -1.203638      | -4.565299 | -0.300405 | O | 8.535206       | 0.525988  | -2.336135 |
| C | -0.495258      | -5.086829 | -1.554744 | C | 7.459350       | -1.316472 | -1.153117 |
| C | 0.329773       | -6.326779 | -1.228646 | O | 7.821738       | -2.219712 | -2.183858 |
| C | 1.233303       | -6.070624 | -0.013874 | C | 7.359683       | -2.002387 | 0.209310  |
| H | 0.566365       | -3.607890 | 0.460292  | O | 6.191889       | -2.828016 | 0.147232  |
| H | -1.950155      | -5.297942 | 0.033868  | C | 7.213190       | -0.983012 | 1.354639  |
| H | 0.188940       | -4.296841 | -1.900780 | O | 8.251479       | 0.025019  | 1.265934  |
| H | -0.360656      | -7.138973 | -0.959734 | C | 7.300591       | -1.617732 | 2.732201  |
| H | 1.687507       | -7.006272 | 0.327343  | O | 8.498112       | -2.384063 | 2.822508  |
| C | -0.731157      | -3.802145 | 2.154026  | C | 6.249628       | -4.156557 | 0.628487  |
| O | -1.416296      | -5.433602 | -2.576113 | C | 5.975340       | -5.123843 | -0.533969 |
| O | 1.152734       | -6.724970 | -2.321898 | O | 6.901530       | -4.868640 | -1.589875 |
| O | 2.222221       | -5.142718 | -0.384100 | C | 4.538848       | -4.980602 | -1.020651 |
| H | -1.796549      | -3.581853 | 2.072295  | O | 4.332373       | -5.970462 | -2.019170 |
| O | -0.110393      | -2.584811 | 2.565404  | C | 3.571035       | -5.120079 | 0.154399  |
| H | -0.598728      | -4.587653 | 2.909211  | O | 2.248637       | -4.889854 | -0.340632 |
| H | -1.988352      | -4.657933 | -2.734402 | C | 3.926293       | -4.105232 | 1.246862  |
| H | 0.590395       | -6.717998 | -3.110893 | O | 5.295162       | -4.355853 | 1.651305  |
| H | 0.857688       | -2.728232 | 2.658000  | C | 3.038838       | -4.166645 | 2.491234  |
| O | 5.389724       | -4.595228 | 1.406390  | O | 2.724873       | -5.487336 | 2.906984  |
| C | 3.998078       | -4.333316 | 1.112076  | C | 1.409353       | -6.013376 | -0.465571 |
| C | 3.564585       | -5.356954 | 0.051968  | C | 0.634464       | -5.924020 | -1.782822 |
| C | 4.427832       | -5.204902 | -1.204234 | O | 1.565887       | -5.825617 | -2.857059 |
| C | 5.908417       | -5.300729 | -0.853304 | C | -0.325995      | -4.739723 | -1.763587 |
| C | 6.251593       | -4.357755 | 0.309050  | O | -1.089945      | -4.805757 | -2.954477 |

|   |           |           |           |   |           |           |           |
|---|-----------|-----------|-----------|---|-----------|-----------|-----------|
| H | 3.899464  | -3.328142 | 0.687031  | C | -1.206468 | -4.746842 | -0.503958 |
| H | 3.674982  | -6.372355 | 0.455224  | O | -1.854815 | -3.471319 | -0.474187 |
| H | 4.234325  | -4.203987 | -1.619881 | C | -0.334899 | -4.927453 | 0.750184  |
| H | 6.116257  | -6.326388 | -0.516444 | O | 0.490238  | -6.096112 | 0.604593  |
| H | 7.262352  | -4.559888 | 0.677426  | C | -1.097248 | -5.110498 | 2.047065  |
| C | 3.225653  | -4.355367 | 2.442673  | O | -0.137288 | -5.027800 | 3.106370  |
| O | 4.141761  | -6.209137 | -2.164485 | C | -3.260229 | -3.385702 | -0.365388 |
| O | 6.743955  | -4.968516 | -1.958891 | C | -3.810487 | -2.573507 | -1.541911 |
| O | 6.143845  | -3.032251 | -0.146731 | O | -3.446799 | -3.221429 | -2.765377 |
| H | 2.393110  | -5.058667 | 2.396000  | C | -3.277614 | -1.146968 | -1.495583 |
| O | 2.650342  | -3.090065 | 2.765415  | O | -3.890737 | -0.432172 | -2.559968 |
| H | 3.914605  | -4.688185 | 3.229745  | C | -3.571118 | -0.520487 | -0.135123 |
| H | 3.178242  | -6.200317 | -2.322483 | O | -2.858133 | 0.721543  | -0.106240 |
| H | 6.408194  | -5.462862 | -2.721447 | C | -3.111919 | -1.429768 | 1.019990  |
| H | 3.363559  | -2.416383 | 2.827616  | O | -3.636679 | -2.763326 | 0.846632  |
| O | 7.669401  | -0.114687 | 1.497393  | C | -3.567838 | -0.932672 | 2.381745  |
| C | 6.598600  | -1.053261 | 1.242997  | O | -4.978915 | -0.716477 | 2.357022  |
| C | 7.140398  | -2.088383 | 0.245948  | C | -3.504735 | 1.873199  | 0.398486  |
| C | 7.570479  | -1.390034 | -1.047656 | C | -3.621618 | 2.919642  | -0.721065 |
| C | 8.564755  | -0.273174 | -0.749509 | O | -4.284529 | 2.332078  | -1.843088 |
| C | 8.034058  | 0.645752  | 0.360725  | C | -2.247025 | 3.445768  | -1.114534 |
| H | 5.757150  | -0.527637 | 0.777756  | O | -2.449132 | 4.484186  | -2.062680 |
| H | 8.000687  | -2.607914 | 0.688322  | C | -1.491413 | 3.923124  | 0.126720  |
| H | 6.670927  | -0.942704 | -1.497986 | O | -0.181856 | 4.320015  | -0.291679 |
| H | 9.493581  | -0.730842 | -0.380090 | C | -1.419364 | 2.792069  | 1.158894  |
| H | 8.822376  | 1.325294  | 0.700053  | O | -2.779610 | 2.413837  | 1.483927  |
| C | 6.117684  | -1.593859 | 2.601076  | C | -0.697095 | 3.149039  | 2.458358  |
| O | 8.187489  | -2.291844 | -1.952490 | O | -0.996821 | 4.449802  | 2.941785  |
| O | 8.834646  | 0.526094  | -1.897983 | H | -0.817386 | 6.285238  | -0.230963 |
| O | 6.937874  | 1.367530  | -0.143436 | H | 1.032441  | 7.146680  | -1.549191 |
| H | 6.152741  | -2.683938 | 2.619687  | H | 0.703747  | 5.737001  | -3.462877 |
| O | 4.764379  | -1.241368 | 2.884460  | O | 2.107093  | 4.300486  | -1.614853 |
| H | 6.795174  | -1.213671 | 3.376520  | H | 3.894903  | 5.561061  | -2.604187 |
| H | 7.584914  | -3.051143 | -2.069236 | H | 3.344742  | 6.695181  | -0.199630 |
| H | 9.020667  | -0.084506 | -2.626728 | H | 1.894806  | 4.265612  | 0.971997  |
| H | 4.680356  | -0.261854 | 2.892075  | H | 2.726461  | 6.812150  | 2.409817  |
| O | 5.603380  | 4.462821  | 1.334058  | H | 3.678437  | 5.302971  | 2.428640  |
| C | 5.663578  | 3.029564  | 1.149183  | H | 2.052806  | 5.501701  | 4.182371  |
| C | 6.822988  | 2.753359  | 0.180191  | H | 5.406439  | 6.314577  | 0.247507  |
| C | 6.567832  | 3.463362  | -1.153033 | H | 7.326386  | 5.388633  | -0.934851 |
| C | 6.322191  | 4.951584  | -0.928683 | H | 6.304420  | 5.154810  | -3.071966 |
| C | 5.258264  | 5.169255  | 0.157232  | H | 5.575868  | 2.983484  | -1.592252 |
| H | 4.732208  | 2.682953  | 0.687501  | H | 7.672696  | 2.284422  | -2.426565 |
| H | 7.761148  | 3.118635  | 0.618524  | H | 7.975217  | 3.198442  | 0.284102  |
| H | 5.659957  | 3.024334  | -1.594806 | H | 5.002464  | 2.805087  | 0.882350  |
| H | 7.257255  | 5.402389  | -0.566521 | H | 5.932552  | 1.643074  | 2.624494  |
| H | 5.221139  | 6.224404  | 0.446235  | H | 5.944008  | 3.288087  | 3.263308  |
| C | 5.763701  | 2.382995  | 2.541892  | H | 8.089649  | 1.697115  | 2.456924  |
| O | 7.668716  | 3.332285  | -2.038177 | H | 9.082439  | 1.459623  | 0.125186  |
| O | 5.888095  | 5.609565  | -2.115756 | H | 9.499530  | -0.689084 | -0.956647 |
| O | 4.014991  | 4.747347  | -0.345640 | H | 8.491695  | -0.116988 | -3.060044 |
| H | 6.635722  | 1.730922  | 2.605391  | H | 6.485750  | -0.849566 | -1.366257 |
| O | 4.638005  | 1.561656  | 2.848664  | H | 7.322796  | -3.051889 | -2.054376 |
| H | 5.878898  | 3.186403  | 3.280877  | H | 8.253755  | -2.611919 | 0.375843  |
| H | 7.879543  | 2.381548  | -2.107806 | H | 6.234177  | -0.497709 | 1.262382  |
| H | 6.490067  | 5.336256  | -2.823834 | H | 6.411803  | -2.246240 | 2.869454  |
| H | 3.820465  | 2.106691  | 2.814396  | H | 7.276504  | -0.820247 | 3.488394  |
| O | 0.745551  | 5.716504  | 1.036858  | H | 8.477753  | -2.861170 | 3.662410  |
| C | 1.900545  | 4.855610  | 0.907397  | H | 7.223457  | -4.355183 | 1.085599  |
| C | 2.861125  | 5.543301  | -0.074303 | H | 6.117444  | -6.146502 | -0.157010 |
| C | 2.171367  | 5.737151  | -1.428468 | H | 6.567113  | -5.361586 | -2.356209 |
| C | 0.854891  | 6.488107  | -1.257978 | H | 4.414102  | -3.974380 | -1.446604 |
| C | -0.000761 | 5.840188  | -0.159713 | H | 3.462253  | -5.806328 | -2.431766 |
| H | 1.592184  | 3.895399  | 0.478818  | H | 3.640103  | -6.123051 | 0.588645  |
| H | 3.161121  | 6.519300  | 0.329743  | H | 3.863393  | -3.086842 | 0.843228  |
| H | 1.950297  | 4.737936  | -1.834283 | H | 2.126374  | -3.598068 | 2.287066  |
| H | 1.083977  | 7.513227  | -0.933369 | H | 3.575854  | -3.641339 | 3.293545  |
| H | -0.852042 | 6.482169  | 0.088042  | H | 1.756012  | -5.573281 | 2.849513  |
| C | 2.441780  | 4.582802  | 2.321732  | H | 1.992186  | -6.938239 | -0.428776 |
| O | 2.980358  | 6.475461  | -2.330185 | H | 0.045845  | -6.847524 | -1.877800 |
| O | 0.091121  | 6.513086  | -2.460634 | H | 1.062711  | -5.585289 | -3.649220 |
| O | -0.438750 | 4.586627  | -0.620323 | H | 0.272212  | -3.816164 | -1.731758 |

|            |                |           |           |            |                |           |           |
|------------|----------------|-----------|-----------|------------|----------------|-----------|-----------|
| H          | 3.495081       | 4.856934  | 2.393197  | H          | -1.780906      | -4.112488 | -2.917624 |
| O          | 2.371418       | 3.203371  | 2.679837  | H          | -1.946688      | -5.554404 | -0.577709 |
| H          | 1.875014       | 5.203424  | 3.027654  | H          | 0.300157       | -4.038659 | 0.846869  |
| H          | 3.852005       | 6.037478  | -2.370363 | H          | -1.598313      | -6.087502 | 2.042588  |
| H          | 0.694860       | 6.778468  | -3.170249 | H          | -1.856954      | -4.325386 | 2.140774  |
| H          | 1.434460       | 2.906651  | 2.652053  | H          | -0.566212      | -5.285290 | 3.933044  |
| O          | -3.231416      | 2.656262  | 0.800418  | H          | -3.707435      | -4.384642 | -0.341539 |
| C          | -1.844337      | 3.047184  | 0.682937  | H          | -4.904881      | -2.544949 | -1.449193 |
| C          | -1.781458      | 4.183849  | -0.348898 | H          | -3.658203      | -2.597615 | -3.476662 |
| C          | -2.338583      | 3.704809  | -1.693905 | H          | -2.185865      | -1.173362 | -1.630839 |
| C          | -3.740027      | 3.131217  | -1.518780 | H          | -3.822720      | 0.525080  | -2.370030 |
| C          | -3.762498      | 2.097307  | -0.384975 | H          | -4.647138      | -0.342787 | -0.045874 |
| H          | -1.258413      | 2.201750  | 0.305138  | H          | -2.015556      | -1.468601 | 1.022698  |
| H          | -2.369278      | 5.039482  | 0.009120  | H          | -3.030709      | -0.002289 | 2.602530  |
| H          | -1.679131      | 2.902482  | -2.058856 | H          | -3.292009      | -1.680397 | 3.137669  |
| H          | -4.416499      | 3.948090  | -1.231338 | H          | -5.229457      | -2.283320 | 3.183328  |
| H          | -4.794519      | 1.821217  | -0.147549 | H          | -4.489774      | 1.614054  | 0.797072  |
| C          | -1.334872      | 3.377041  | 2.096049  | H          | -4.220429      | 3.756021  | -0.335357 |
| O          | -2.410703      | 4.761578  | -2.637655 | H          | -4.194748      | 2.969195  | -2.569602 |
| O          | -4.215264      | 2.496567  | -2.704518 | H          | -1.674083      | 2.620995  | -1.563460 |
| H          | -0.871879      | 4.364246  | 2.119059  | H          | -1.575327      | 4.754913  | -2.405398 |
| O          | -0.334486      | 2.465411  | 2.548187  | H          | -2.010863      | 4.769879  | 0.587645  |
| H          | -2.197682      | 3.384660  | 2.774591  | H          | -0.910516      | 1.922677  | 0.723943  |
| H          | -1.526789      | 5.173106  | -2.685302 | H          | 0.378736       | 3.036920  | 2.293116  |
| H          | -4.075854      | 3.119471  | -3.433365 | H          | -0.990754      | 2.396459  | 3.203807  |
| H          | -0.698091      | 1.552094  | 2.538630  | H          | -0.153281      | 4.936873  | 2.959716  |
| C          | -8.456741      | -0.643403 | 4.374099  | C          | -10.412224     | -0.708572 | 3.727960  |
| C          | -7.335389      | -1.296464 | 3.862085  | C          | -9.123604      | -1.237200 | 3.653874  |
| C          | -7.139895      | -1.344554 | 2.482637  | C          | -8.428048      | -1.186891 | 2.446339  |
| C          | -8.049737      | -0.756940 | 1.590140  | C          | -8.996049      | -0.621286 | 1.293975  |
| C          | -9.168227      | -0.078181 | 2.109651  | C          | -10.286739     | -0.063453 | 1.377587  |
| C          | -9.353296      | -0.032570 | 3.497806  | C          | -10.974757     | -0.117304 | 2.597141  |
| C          | -10.101383     | 0.694885  | 1.196286  | C          | -10.888100     | 0.694224  | 0.207831  |
| C          | -9.323289      | 1.756323  | 0.453712  | C          | -9.990086      | 1.851247  | -0.163986 |
| C          | -9.455589      | 3.114829  | 0.741915  | C          | -10.334677     | 3.178036  | 0.094901  |
| C          | -8.719687      | 4.077632  | 0.044279  | C          | -9.477905      | 4.227145  | -0.252535 |
| C          | -7.830930      | 3.669403  | -0.948744 | C          | -8.254657      | 3.939314  | -0.856160 |
| C          | -7.673478      | 2.311293  | -1.241439 | C          | -7.885623      | 2.615190  | -1.110294 |
| C          | -8.414224      | 1.341173  | -0.546463 | C          | -8.746216      | 1.560004  | -0.768623 |
| C          | -7.775031      | -0.988532 | 0.107148  | C          | -8.174004      | -0.745823 | 0.012544  |
| N          | -8.366262      | -0.041414 | -0.864935 | N          | -8.469344      | 0.203329  | -1.084655 |
| C          | -8.224916      | -2.414970 | -0.273896 | C          | -8.329059      | -2.180320 | -0.538706 |
| C          | -7.934372      | -0.378016 | -2.226852 | C          | -7.572349      | -0.025430 | -2.221717 |
| C          | -8.371775      | -1.795260 | -2.583808 | C          | -7.734175      | -1.449035 | -2.744539 |
| N          | -7.812657      | -2.754757 | -1.633237 | N          | -7.452910      | -2.414431 | -1.683997 |
| C          | -8.166976      | -4.127825 | -1.975790 | C          | -7.544447      | -3.789397 | -2.163079 |
| H          | -8.624757      | -0.594754 | 5.445951  | H          | -10.968538     | -0.738632 | 4.660291  |
| H          | -6.614715      | -1.760486 | 4.528737  | H          | -6.658490      | -1.680763 | 4.529321  |
| H          | -6.260912      | -1.846666 | 2.084073  | H          | -7.416262      | -1.581543 | 2.394168  |
| H          | -10.214117     | 0.500321  | 3.893465  | H          | -11.967121     | 0.322283  | 2.657208  |
| H          | -10.901261     | 1.151056  | 1.785647  | H          | -11.884660     | 1.055631  | 0.475729  |
| H          | -10.563129     | 0.017686  | 0.467120  | H          | -10.990564     | 0.031365  | -0.660190 |
| H          | -10.158328     | 3.423532  | 1.511903  | H          | -11.294054     | 3.392750  | 0.559269  |
| H          | -8.845056      | 5.131643  | 0.273058  | H          | -9.766794      | 5.255151  | -0.055028 |
| H          | -7.252009      | 4.404306  | -1.501192 | H          | -7.576377      | 4.743742  | -1.127087 |
| H          | -6.963401      | 2.016124  | -2.006304 | H          | -6.919523      | 2.409677  | -1.559886 |
| H          | -6.678003      | -0.969634 | -0.015032 | H          | -7.115089      | -0.631884 | 0.304483  |
| H          | -9.322595      | -2.483010 | -0.142264 | H          | -9.394751      | -2.342198 | -0.793356 |
| H          | -7.764909      | -3.127672 | 0.417136  | H          | -8.066896      | -2.891878 | 0.250117  |
| H          | -6.841242      | -0.303133 | -2.345811 | H          | -6.513514      | 0.136371  | -1.964487 |
| H          | -8.401361      | 0.326418  | -2.920206 | H          | -7.835964      | 0.680222  | -3.014227 |
| H          | -8.011491      | -2.041248 | -3.588877 | H          | -7.028915      | -1.612328 | -3.566831 |
| H          | -9.477803      | -1.841755 | -2.603836 | H          | -8.757123      | -1.576822 | -3.148296 |
| H          | -9.257559      | -4.309090 | -1.960013 | H          | -8.548465      | -4.407204 | -2.547471 |
| H          | -7.698280      | -4.818547 | -1.268122 | H          | -7.305034      | -4.480802 | -1.349318 |
| H          | -7.799234      | -4.362801 | -2.979414 | H          | -6.819752      | -3.945141 | -2.968415 |
| <b>CR2</b> |                |           |           | <b>CR2</b> |                |           |           |
| E          | -5082.93931568 |           |           | E          | -5082.93085002 |           |           |
| O          | 3.228585       | -2.599957 | 3.535712  | C          | 0.149309       | 5.739724  | -1.932110 |
| C          | 2.831845       | -1.249169 | 3.204944  | C          | 0.663080       | 5.614961  | -3.370365 |
| C          | 2.927984       | -0.426273 | 4.498048  | O          | -0.452618      | 5.607552  | -4.257558 |
| C          | 2.002876       | -1.018571 | 5.565468  | C          | 1.520537       | 4.364245  | -3.534842 |

|   |           |           |           |   |           |           |           |
|---|-----------|-----------|-----------|---|-----------|-----------|-----------|
| C | 2.307827  | -2.498006 | 5.775403  | O | 2.070237  | 4.402109  | -4.840530 |
| C | 2.341825  | -3.242194 | 4.432763  | C | 2.605253  | 4.272526  | -2.450584 |
| H | 1.790009  | -1.248957 | 2.865529  | O | 3.156529  | 2.957168  | -2.583656 |
| H | 3.963961  | -0.438688 | 4.861942  | C | 1.972105  | 4.464058  | -1.064627 |
| H | 0.969098  | -0.925545 | 5.198344  | O | 1.249565  | 5.709806  | -1.047547 |
| H | 3.308996  | -2.581281 | 6.221912  | C | 2.922548  | 4.514724  | 0.119319  |
| H | 2.739282  | -4.252934 | 4.568786  | O | 2.112215  | 4.530579  | 1.285359  |
| C | 3.706967  | -0.779331 | 2.029927  | C | 4.552567  | 2.773467  | -2.637511 |
| O | 2.487673  | 0.919428  | 4.313309  | C | 4.902046  | 1.995690  | -3.916647 |
| O | 2.151919  | -0.363242 | 6.814636  | O | 4.385946  | 2.699863  | -5.045058 |
| O | 1.343718  | -3.131852 | 6.611677  | C | 4.356998  | 0.572810  | -3.852511 |
| O | 1.035664  | -3.286233 | 3.915234  | O | 4.831619  | -0.111703 | -5.000857 |
| H | 4.238611  | 0.138534  | 2.283333  | C | 4.802379  | -0.094459 | -2.552855 |
| O | 2.943016  | -0.477298 | 0.862998  | O | 4.174472  | -1.380224 | -2.499660 |
| H | 4.448331  | -1.561833 | 1.824317  | C | 4.399194  | 0.761556  | -1.348240 |
| H | 2.054225  | 0.595938  | 6.659587  | O | 5.014952  | 2.061852  | -1.504308 |
| H | 1.229176  | -2.563848 | 7.388032  | C | 4.820123  | 0.179496  | 0.005413  |
| H | 2.458438  | -1.283032 | 0.576942  | O | 6.072529  | -0.494826 | 0.000797  |
| O | -0.132222 | -5.603373 | 1.306665  | C | 4.992457  | -2.520233 | -2.416520 |
| C | 0.406109  | -4.350391 | 1.788944  | C | 4.482582  | -3.568349 | -3.407456 |
| C | 0.579625  | -4.495381 | 3.308241  | O | 4.510711  | -3.001417 | -4.715576 |
| C | -0.773564 | -4.794182 | 3.961022  | C | 3.082147  | -4.025328 | -3.022544 |
| C | -1.420900 | -6.015687 | 3.317792  | O | 2.716708  | -5.061091 | -3.919033 |
| C | -1.434468 | -5.878721 | 1.788276  | C | 3.051491  | -4.487304 | -1.565665 |
| H | -0.313092 | -3.546969 | 1.594306  | O | 1.667569  | -4.655503 | -1.241308 |
| H | 1.280629  | -5.313752 | 3.519866  | C | 3.683506  | -3.450268 | -0.617975 |
| H | -1.425150 | -3.924193 | 3.786390  | O | 4.993355  | -3.058172 | -1.100267 |
| H | -0.811308 | -6.896999 | 3.563504  | C | 3.849089  | -3.964704 | 0.802001  |
| H | -1.727797 | -6.825531 | 1.323783  | O | 4.562662  | -5.197803 | 0.774346  |
| C | 1.678412  | -4.043452 | 0.979537  | C | 1.245860  | -5.813437 | -0.549306 |
| O | -0.643697 | -5.050830 | 5.350228  | C | 0.243643  | -6.581401 | -1.425500 |
| O | -2.761828 | -6.207815 | 3.760169  | O | 0.843134  | -6.865813 | -2.689413 |
| O | -2.333270 | -4.854636 | 1.442558  | C | -1.042691 | -5.782311 | -1.597213 |
| H | 2.531656  | -3.891279 | 1.641832  | O | -1.950557 | -6.601597 | -2.320458 |
| O | 1.562895  | -2.848705 | 0.207774  | C | -1.587041 | -5.364304 | -0.231131 |
| H | 1.889839  | -4.908872 | 0.338341  | O | -2.738908 | -4.543824 | -0.451755 |
| H | -0.158335 | -4.301134 | 5.744735  | C | -0.512370 | -4.596172 | 0.545799  |
| H | -2.750517 | -6.134870 | 4.726145  | O | 0.638413  | -5.466685 | 0.679083  |
| H | 0.818724  | -2.947420 | -0.426493 | C | -0.936950 | -4.137884 | 1.941363  |
| O | -3.815511 | -4.385620 | -1.892977 | O | -1.701721 | -5.099203 | 2.654442  |
| C | -2.819128 | -4.165313 | -0.867852 | C | -3.992723 | -5.107002 | -0.148804 |
| C | -3.203072 | -5.050076 | 0.327512  | C | -4.990612 | -4.755379 | -1.255397 |
| C | -4.598567 | -4.668920 | 0.831238  | O | -4.474999 | -5.212850 | -2.502560 |
| C | -5.614161 | -4.726668 | -0.304557 | C | -5.265931 | -3.255846 | -1.280067 |
| C | -5.108702 | -3.943569 | -1.525152 | O | -6.285208 | -3.040216 | -2.239410 |
| H | -2.851296 | -3.117384 | -0.549174 | C | -5.653985 | -2.734329 | 0.111812  |
| H | -3.196347 | -6.104673 | 0.021660  | O | -5.650205 | -1.306177 | 0.009874  |
| H | -4.546629 | -3.631950 | 1.197344  | C | -4.625758 | -3.204579 | 1.155658  |
| H | -5.726545 | -5.776227 | -0.611943 | O | -4.490313 | -4.634830 | 1.087321  |
| H | -5.746716 | -4.139506 | -2.392722 | C | -4.977287 | -2.887500 | 2.595987  |
| C | -1.437717 | -4.420928 | -1.495483 | O | -3.827938 | -3.213621 | 3.388659  |
| O | -5.043342 | -5.540324 | 1.858627  | C | -6.779671 | -0.563138 | 0.417005  |
| O | -6.877533 | -4.189358 | 0.077611  | C | -7.259045 | 0.309197  | -0.751138 |
| O | -5.108193 | -2.574088 | -1.206934 | O | -7.569911 | -0.528110 | -1.864770 |
| H | -0.880528 | -5.161206 | -0.920147 | C | -6.201240 | 1.341832  | -1.116650 |
| O | -0.621660 | -3.250333 | -1.521348 | O | -6.754539 | 2.176377  | -2.122301 |
| H | -1.593239 | -4.815517 | -2.507842 | C | -5.775554 | 2.135239  | 0.116075  |
| H | -4.348345 | -5.566515 | 2.543851  | O | -4.639293 | 2.901905  | -0.296100 |
| H | -7.103858 | -4.586707 | 0.931683  | C | -5.405662 | 1.205005  | 1.285200  |
| H | -1.084408 | -2.548104 | -2.029612 | O | -6.473641 | 0.261712  | 1.521994  |
| O | -5.025118 | 0.165859  | -3.663668 | C | -5.152991 | 1.949230  | 2.585397  |
| C | -4.427985 | -0.792963 | -2.760619 | O | -6.269450 | 2.787840  | 2.873936  |
| C | -5.571272 | -1.641299 | -2.183558 | C | -4.539399 | 4.258616  | 0.081836  |
| C | -6.566830 | -0.741061 | -1.445508 | C | -4.445330 | 5.123753  | -1.185408 |
| C | -7.056998 | 0.377360  | -2.358606 | O | -5.557328 | 4.832513  | -2.031999 |
| C | -5.872686 | 1.098179  | -3.018876 | C | -3.125135 | 4.884234  | -1.909761 |
| H | -3.939357 | -0.260570 | -1.936730 | O | -3.062418 | 5.808890  | -2.986157 |
| H | -6.084290 | -2.168953 | -2.998600 | C | -1.948582 | 5.028150  | -0.941832 |
| H | -6.035706 | -0.287017 | -0.594697 | O | -0.760059 | 4.697497  | -1.667576 |
| H | -7.655848 | -0.073702 | -3.162674 | C | -2.155017 | 4.088542  | 0.252121  |
| H | -6.228309 | 1.768135  | -3.808049 | O | -3.398509 | 4.469677  | 0.889856  |
| C | -3.341043 | -1.551338 | -3.541826 | C | -1.047513 | 4.094982  | 1.302655  |

|   |           |           |           |   |           |           |           |
|---|-----------|-----------|-----------|---|-----------|-----------|-----------|
| O | -7.700685 | -1.466572 | -0.998025 | O | -0.543224 | 5.383244  | 1.621579  |
| O | -7.830787 | 1.344852  | -1.654561 | H | -0.326543 | 6.713598  | -1.782501 |
| O | -5.180882 | 1.818692  | -2.029273 | H | 1.293869  | 6.493721  | -3.566163 |
| H | -3.507379 | -2.628217 | -3.496180 | H | -0.119955 | 5.356031  | -5.131849 |
| O | -2.032840 | -1.336253 | -3.009477 | H | 0.868894  | 3.485416  | -3.410615 |
| H | -3.394791 | -1.236122 | -4.591423 | H | 2.719920  | 3.674593  | -4.918837 |
| H | -7.377388 | -2.233580 | -0.487641 | H | 3.376257  | 5.032506  | -2.632619 |
| H | -8.476334 | 0.854832  | -1.123858 | H | 1.273940  | 3.635674  | -0.896855 |
| H | -1.840173 | -0.372071 | -2.998179 | H | 3.549175  | 5.416995  | 0.048292  |
| O | -2.860252 | 4.594733  | -2.692422 | H | 3.580194  | 3.637266  | 0.091906  |
| C | -3.194714 | 3.210558  | -2.442073 | H | 2.627675  | 4.388363  | 2.122520  |
| C | -4.724625 | 3.136069  | -2.336962 | H | 5.072069  | 3.736728  | -2.620088 |
| C | -5.202861 | 4.018239  | -1.178847 | H | 5.997818  | 1.943085  | -3.982120 |
| C | -4.681165 | 5.443389  | -1.337072 | H | 4.466607  | 2.097086  | -5.800476 |
| C | -3.168588 | 5.446363  | -1.604214 | H | 3.257457  | 0.618914  | -3.853472 |
| H | -2.767158 | 2.903026  | -1.481176 | H | 4.532288  | -1.040688 | -4.947091 |
| H | -5.174246 | 3.483026  | -3.276642 | H | 5.892139  | -0.208356 | -2.548942 |
| H | -4.787949 | 3.598351  | -0.249450 | H | 3.310288  | 0.891114  | -1.334991 |
| H | -5.168667 | 5.889671  | -2.215699 | H | 4.021522  | -0.480967 | 0.360525  |
| H | -2.837665 | 6.445091  | -1.906203 | H | 4.889334  | 1.012122  | 0.712592  |
| C | -2.528970 | 2.360864  | -3.537312 | H | 5.886659  | -1.428194 | -0.198317 |
| O | -6.618518 | 4.078602  | -1.111887 | H | 6.035911  | -2.268732 | -2.629079 |
| O | -4.929716 | 6.237632  | -0.180732 | H | 5.160596  | -4.431694 | -3.357792 |
| O | -2.507548 | 5.035313  | -0.433975 | H | 3.994639  | -3.591501 | -5.285466 |
| H | -3.267912 | 1.768500  | -4.078459 | H | 2.400260  | -3.166806 | -3.117555 |
| O | -1.593747 | 1.425269  | -2.997073 | H | 1.938363  | -5.525882 | -3.550000 |
| H | -2.041200 | 3.039777  | -4.247705 | H | 3.586492  | -5.438238 | -1.475037 |
| H | -6.952266 | 3.161265  | -1.094368 | H | 3.032939  | -2.568013 | -0.589923 |
| H | -5.860584 | 6.107697  | 0.053838  | H | 2.847577  | -4.092052 | 1.231709  |
| H | -0.893557 | 1.912632  | -2.507310 | H | 4.381743  | -3.207120 | 1.393847  |
| O | 1.062092  | 5.587942  | 0.272103  | H | 4.568560  | -5.551973 | 1.673170  |
| C | -0.061579 | 4.823663  | -0.223250 | H | 2.105152  | -6.439620 | -0.291805 |
| C | -1.307107 | 5.707335  | -0.051738 | H | 0.003641  | -7.522063 | -0.910018 |
| C | -1.495001 | 6.052509  | 1.429527  | H | 0.119918  | -7.171035 | -3.260092 |
| C | -0.231604 | 6.685754  | 2.002402  | H | -0.812487 | -4.869152 | -2.165491 |
| C | 1.002722  | 5.836747  | 1.664422  | H | -2.736682 | -6.063731 | -2.537775 |
| H | -0.188413 | 3.923433  | 0.388654  | H | -1.862614 | -6.247270 | 0.355183  |
| H | -1.186710 | 6.629534  | -0.635378 | H | -0.210257 | -3.705150 | -0.018619 |
| H | -1.683909 | 5.110141  | 1.966456  | H | -1.492568 | -3.201478 | 1.837038  |
| H | -0.094233 | 7.667774  | 1.527698  | H | -0.018562 | -3.907015 | 2.498458  |
| H | 1.919365  | 6.383670  | 1.907020  | H | -2.575100 | -4.697883 | 2.809924  |
| O | 0.278167  | 4.370163  | -1.653056 | H | -3.913224 | -6.192488 | -0.039734 |
| C | -2.565924 | 6.962186  | 1.625139  | H | -5.930777 | -5.275469 | -1.023023 |
| O | -0.298290 | 6.829535  | 3.418419  | H | -5.023023 | -4.819998 | -3.198188 |
| O | 0.931036  | 4.636467  | 2.392028  | H | -4.337344 | -2.741013 | -1.571118 |
| H | -0.511733 | 4.657454  | -2.348059 | H | -6.560426 | -2.101760 | -2.193935 |
| O | 0.401245  | 2.950824  | -1.765387 | H | -6.656368 | -3.098062 | 0.373002  |
| H | 1.205680  | 4.870234  | -1.958554 | H | -3.664162 | -2.731945 | 0.920838  |
| H | -3.354083 | 6.586001  | 1.189187  | H | -5.844528 | -3.487414 | 2.899918  |
| H | -1.155241 | 7.234522  | 3.618705  | H | -5.232809 | -1.825614 | 2.688721  |
| H | 1.121552  | 2.631855  | -1.176549 | H | -4.088372 | -3.223449 | 4.319087  |
| O | 3.771883  | 2.383650  | 3.036541  | H | -7.580012 | -1.230226 | 0.752410  |
| C | 2.638377  | 2.867980  | 2.279856  | H | -8.164942 | 0.835095  | -0.419723 |
| C | 2.119362  | 4.124978  | 2.995882  | H | -7.687473 | 0.061617  | -2.625525 |
| C | 1.721669  | 3.782748  | 4.434522  | H | -5.315913 | 0.809322  | -1.496224 |
| C | 2.879669  | 3.116765  | 5.167727  | H | -6.191370 | 2.972471  | -2.200297 |
| C | 3.443253  | 1.950260  | 4.342980  | H | -6.592371 | 2.796505  | 0.423452  |
| H | 1.844938  | 2.111711  | 2.284812  | H | -4.490926 | 0.658050  | 1.024345  |
| H | 2.902598  | 4.894550  | 3.002705  | H | -4.234723 | 2.537284  | 2.466258  |
| H | 0.885117  | 3.068738  | 4.386473  | H | -4.989710 | 1.210653  | 3.382617  |
| H | 3.684991  | 3.855995  | 5.284031  | H | -6.034814 | 3.334772  | 3.634914  |
| H | 4.381823  | 1.595541  | 4.780534  | H | -5.397920 | 4.549979  | 0.694006  |
| C | 3.105303  | 3.061433  | 0.828243  | H | -4.482678 | 6.176768  | -0.872001 |
| O | 1.349927  | 4.940407  | 5.165502  | H | -5.361559 | 5.256907  | -2.882140 |
| O | 2.488242  | 2.614204  | 6.442521  | H | -3.121302 | 3.851630  | -2.289801 |
| H | 2.826150  | 4.050013  | 0.462429  | H | -2.262295 | 5.608457  | -3.509576 |
| O | 2.515157  | 2.131756  | -0.082162 | H | -1.885705 | 6.054461  | -0.564327 |
| H | 4.199933  | 2.986888  | 0.812664  | H | -2.252266 | 3.055843  | -0.105721 |
| H | 0.670043  | 5.410495  | 4.646121  | H | -0.237757 | 3.455697  | 0.939596  |
| H | 1.995962  | 3.322704  | 6.883351  | H | -1.462137 | 3.619344  | 2.202838  |
| H | 2.660125  | 1.212482  | 0.236306  | H | 0.405490  | 5.354093  | 1.386969  |
| C | 1.391743  | -1.225214 | -3.900666 | C | -0.982460 | -0.941081 | 4.188542  |

|            |                |           |           |            |                |           |           |
|------------|----------------|-----------|-----------|------------|----------------|-----------|-----------|
| C          | 1.689448       | 0.109151  | -3.622612 | C          | -0.872098      | -0.075436 | 3.100046  |
| C          | 3.017826       | 0.494604  | -3.449841 | C          | 0.251780       | 0.740338  | 2.982035  |
| C          | 4.072585       | -0.424828 | -3.551201 | C          | 1.278927       | 0.722709  | 3.936865  |
| C          | 3.771805       | -1.765884 | -3.859089 | C          | 1.177303       | -0.166340 | 5.023828  |
| C          | 2.433035       | -2.144731 | -4.025281 | C          | 0.045627       | -0.986284 | 5.130668  |
| C          | 4.876984       | -2.771307 | -4.123413 | C          | 2.325416       | -0.328478 | 6.002457  |
| C          | 5.726682       | -2.298668 | -5.279653 | C          | 3.563451       | -0.773318 | 5.258823  |
| C          | 5.691227       | -2.912548 | -6.531742 | C          | 4.067219       | -2.069964 | 5.363872  |
| C          | 6.485091       | -2.450921 | -7.586343 | C          | 5.206389       | -2.463666 | 4.654889  |
| C          | 7.319558       | -1.353055 | -7.383138 | C          | 5.844037       | -1.544574 | 3.822888  |
| C          | 7.356286       | -0.716885 | -6.139494 | C          | 5.345869       | -0.244743 | 3.696668  |
| C          | 6.562562       | -1.176704 | -5.077224 | C          | 4.202784       | 0.154945  | 4.405427  |
| C          | 5.465015       | 0.109478  | -3.224780 | C          | 2.389196       | 1.753275  | 3.745921  |
| N          | 6.629260       | -0.627406 | -3.770136 | N          | 3.701670       | 1.484154  | 4.376379  |
| C          | 5.625108       | 0.193157  | -1.690585 | C          | 1.890369       | 3.123284  | 4.251175  |
| C          | 7.874068       | 0.057181  | -3.414731 | C          | 4.656232       | 2.534754  | 4.016669  |
| C          | 8.014900       | 0.137647  | -1.898304 | C          | 4.159465       | 3.894527  | 4.498927  |
| N          | 6.877607       | 0.847824  | -1.319845 | N          | 2.842033       | 4.194947  | 3.924868  |
| C          | 7.008042       | 0.982174  | 0.125594  | C          | 2.336156       | 5.499127  | 4.368762  |
| H          | 0.360090       | -1.542350 | -4.019785 | H          | -1.849175      | -1.588534 | 4.283445  |
| H          | 0.896617       | 0.845079  | -3.542731 | H          | -1.650407      | -0.038739 | 2.343494  |
| H          | 3.242119       | 1.533093  | -3.219481 | H          | 0.337670       | 1.409367  | 2.130086  |
| H          | 2.210044       | -3.181373 | -4.265111 | H          | -0.020751      | -1.677864 | 5.966637  |
| H          | 4.441370       | -3.749247 | -4.345455 | H          | 2.057805       | -1.060772 | 6.768718  |
| H          | 5.512713       | -2.878251 | -3.235703 | H          | 2.533651       | 0.624320  | 6.504729  |
| H          | 5.045508       | -3.775081 | -6.677064 | H          | 3.568562       | -2.776350 | 6.022763  |
| H          | 6.453581       | -2.948304 | -8.551078 | H          | 5.591350       | -3.473648 | 4.758150  |
| H          | 7.942124       | -0.981148 | -8.192015 | H          | 6.728727       | -1.832289 | 3.262360  |
| H          | 8.003772       | 0.142109  | -6.000970 | H          | 5.850840       | 0.451211  | 3.036662  |
| H          | 5.505067       | 1.147513  | -3.601680 | H          | 2.540140       | 1.857731  | 2.656167  |
| H          | 5.554418       | -0.832697 | -1.278238 | H          | 1.715957       | 3.059497  | 5.339189  |
| H          | 4.791687       | 0.768272  | -1.276138 | H          | 0.937072       | 3.358477  | 3.771069  |
| H          | 7.917526       | 1.078826  | -3.831543 | H          | 4.827288       | 2.583085  | 2.926418  |
| H          | 8.713228       | -0.509808 | -3.825444 | H          | 5.613963       | 2.317152  | 4.495293  |
| H          | 8.935082       | 0.678091  | -1.648685 | H          | 4.864154       | 4.672728  | 4.188516  |
| H          | 8.108421       | -0.887799 | -1.490330 | H          | 4.115572       | 3.895757  | 5.601710  |
| H          | 7.033425       | 0.009055  | 0.651211  | H          | 2.186209       | 5.540815  | 5.459522  |
| H          | 6.166996       | 1.557890  | 0.524315  | H          | 1.381609       | 5.701409  | 3.874785  |
| H          | 7.932302       | 1.518227  | 0.364128  | H          | 3.047379       | 6.280358  | 4.086550  |
| <b>NR2</b> |                |           |           | <b>NR2</b> |                |           |           |
| E          | -5082.94134197 |           |           | E          | -5082.91964695 |           |           |
| O          | -5.643198      | -1.238765 | 2.057471  | C          | 0.264440       | -6.334210 | -0.291880 |
| C          | -4.948273      | -0.078572 | 1.544225  | C          | -0.621718      | -6.714314 | -1.481297 |
| C          | -5.990445      | 0.778264  | 0.809852  | O          | 0.200719       | -6.881945 | -2.633200 |
| C          | -6.621047      | -0.029893 | -0.328461 | C          | -1.692866      | -5.656561 | -1.712461 |
| C          | -7.191821      | -1.342827 | 0.196049  | O          | -2.522034      | -6.128436 | -2.758905 |
| C          | -6.150079      | -2.086927 | 1.044221  | C          | -2.479405      | -5.379957 | -0.426329 |
| H          | -4.189591      | -0.398943 | 0.821314  | O          | -3.284820      | -4.229421 | -0.702951 |
| H          | -6.770592      | 1.093326  | 1.515465  | C          | -1.520919      | -5.090118 | 0.743464  |
| H          | -5.823265      | -0.262750 | -1.050550 | O          | -0.547500      | -6.152040 | 0.858362  |
| H          | -8.042883      | -1.109644 | 0.851837  | C          | -2.210558      | -4.988759 | 2.090648  |
| H          | -6.616356      | -2.927471 | 1.567849  | O          | -1.258303      | -4.479086 | 3.024392  |
| C          | -4.218427      | 0.589048  | 2.722784  | C          | -4.673015      | -4.257652 | -0.450338 |
| O          | -5.403705      | 1.918425  | 0.182156  | C          | -5.425727      | -3.888873 | -1.738373 |
| O          | -7.673783      | 0.682321  | -0.958650 | O          | -5.034588      | -4.778683 | -2.782435 |
| O          | -7.606839      | -2.206669 | -0.858566 | C          | -5.170297      | -2.435208 | -2.121874 |
| O          | -5.123967      | -2.537284 | 0.195073  | O          | -5.997189      | -2.147273 | -3.237563 |
| H          | -4.486546      | 1.643582  | 2.797228  | C          | -5.465395      | -1.528685 | -0.928645 |
| O          | -2.798669      | 0.556042  | 2.580915  | O          | -5.116574      | -0.193836 | -1.312345 |
| H          | -4.534535      | 0.086573  | 3.646026  | C          | -4.660546      | -1.978300 | 0.295191  |
| H          | -7.324923      | 1.557365  | -1.215196 | O          | -5.020121      | -3.351842 | 0.579881  |
| H          | -8.142348      | -1.672016 | -1.463494 | C          | -4.910631      | -1.138247 | 1.554351  |
| H          | -2.503955      | -0.379323 | 2.519582  | O          | -6.239241      | -0.650035 | 1.691568  |
| O          | -2.722432      | -5.199683 | 1.029927  | C          | -6.114132      | 0.795718  | -1.264603 |
| C          | -3.178605      | -3.828687 | 0.968518  | C          | -6.074406      | 1.609309  | -2.559428 |
| C          | -4.599875      | -3.851413 | 0.386341  | O          | -6.266071      | 0.719861  | -3.657331 |
| C          | -4.582521      | -4.486083 | -1.007368 | C          | -4.759606      | 2.368342  | -2.675624 |
| C          | -3.933733      | -5.865065 | -0.961067 | O          | -4.844123      | 3.170991  | -3.840800 |
| C          | -2.578285      | -5.803943 | -0.241461 | C          | -4.508212      | 3.198496  | -1.416635 |
| H          | -2.533761      | -3.260574 | 0.288460  | O          | -3.163039      | 3.675120  | -1.523726 |
| H          | -5.258828      | -4.430136 | 1.047157  | C          | -4.659494      | 2.354207  | -0.137302 |
| H          | -3.975320      | -3.838928 | -1.658935 | O          | -5.930794      | 1.656624  | -0.147548 |



|   |           |           |           |   |           |           |           |
|---|-----------|-----------|-----------|---|-----------|-----------|-----------|
| H | -4.584799 | -6.531641 | -0.377659 | C | -4.594143 | 3.181857  | 1.134785  |
| H | -2.205555 | -6.814729 | -0.047788 | O | -5.551054 | 4.234642  | 1.060838  |
| C | -3.025946 | -3.226501 | 2.375152  | C | -2.877196 | 5.034190  | -1.259426 |
| O | -5.891715 | -4.637321 | -1.532387 | C | -2.288941 | 5.676470  | -2.524766 |
| O | -3.722824 | -6.402631 | -2.263844 | O | -3.199154 | 5.504797  | -3.611091 |
| O | -1.676246 | -5.086847 | -1.047010 | C | -0.929986 | 5.068976  | -2.850229 |
| H | -3.968424 | -2.801327 | 2.721663  | O | -0.408714 | 5.784385  | -3.960989 |
| O | -2.079668 | -2.157146 | 2.415459  | C | -0.015843 | 5.135502  | -1.626720 |
| H | -2.736686 | -4.033056 | 3.060424  | O | 1.200391  | 4.456058  | -1.956313 |
| H | -6.335342 | -3.769766 | -1.471453 | C | -0.695533 | 4.472411  | -0.423544 |
| H | -4.552114 | -6.289457 | -2.751684 | O | -1.954566 | 5.152951  | -0.195343 |
| H | -1.210189 | -2.476573 | 2.086153  | C | 0.118080  | 4.515552  | 0.873016  |
| O | 1.989521  | -5.200949 | -0.746210 | O | 0.845476  | 5.721765  | 1.064224  |
| C | 0.677640  | -4.653833 | -0.479877 | C | 2.354899  | 5.241136  | -2.129861 |
| C | -0.339514 | -5.571555 | -1.175041 | C | 3.114284  | 4.765110  | -3.371115 |
| C | -0.060325 | -5.612821 | -2.680744 | O | 2.248833  | 4.836545  | -4.501043 |
| C | 1.385080  | -6.019542 | -2.946006 | C | 3.649864  | 3.351144  | -3.170342 |
| C | 2.350774  | -5.162959 | -2.114491 | O | 4.429097  | 3.045427  | -4.312304 |
| H | 0.604541  | -3.653614 | -0.921752 | C | 4.448908  | 3.237125  | -1.863838 |
| H | -0.262384 | -6.584291 | -0.757990 | O | 4.686058  | 1.839160  | -1.656932 |
| H | -0.213016 | -4.596339 | -3.075056 | C | 3.632185  | 3.815674  | -0.695847 |
| H | 1.511984  | -7.063287 | -2.624725 | O | 3.213546  | 5.156242  | -1.008816 |
| H | 3.363501  | -5.575391 | -2.163143 | C | 4.373174  | 3.906119  | 0.623101  |
| C | 0.537787  | -4.507393 | 1.045543  | O | 3.400449  | 4.247625  | 1.618502  |
| O | -0.901452 | -6.540100 | -3.347597 | C | 6.005125  | 1.371671  | -1.456352 |
| O | 1.737194  | -5.882988 | -4.319938 | C | 6.346725  | 0.325853  | -2.524777 |
| O | 2.323748  | -3.849266 | -2.614035 | O | 6.201122  | 0.903361  | -3.821791 |
| H | -0.340472 | -5.042055 | 1.409843  | C | 5.467488  | -0.908856 | -2.374578 |
| O | 0.364170  | -3.148384 | 1.452937  | O | 5.910016  | -1.846044 | -3.342158 |
| H | 1.428638  | -4.946189 | 1.511684  | C | 5.555702  | -1.450930 | -0.949696 |
| H | -1.824305 | -6.326770 | -3.110304 | O | 4.552624  | -2.467828 | -0.837739 |
| H | 1.026312  | -6.295418 | -4.832926 | C | 5.297456  | -0.339352 | 0.083648  |
| H | 1.120180  | -2.611084 | 1.126209  | O | 6.153749  | 0.794956  | -0.176458 |
| O | 4.922208  | -1.318805 | -2.003051 | C | 5.551407  | -0.787674 | 1.512826  |
| C | 3.670801  | -1.990085 | -1.729657 | O | 6.865034  | -1.331871 | 1.611630  |
| C | 3.556394  | -3.139913 | -2.740981 | C | 4.899377  | -3.726531 | -0.296662 |
| C | 3.559568  | -2.575058 | -4.165246 | C | 4.628393  | -4.818125 | -1.343428 |
| C | 4.785387  | -1.695742 | -4.393338 | O | 5.344239  | -4.516004 | -2.540808 |
| C | 4.939044  | -0.669231 | -3.261178 | C | 3.134206  | -4.948871 | -1.614237 |
| H | 2.841965  | -1.294495 | -1.901370 | O | 2.967382  | -6.045435 | -2.499419 |
| H | 4.403613  | -3.826474 | -2.613054 | C | 2.386412  | -5.143098 | -0.297333 |
| H | 2.659992  | -1.949878 | -4.275037 | O | 0.985763  | -5.168288 | -0.600231 |
| H | 5.676483  | -2.339456 | -4.374588 | C | 2.718805  | -4.011564 | 0.681735  |
| H | 5.912448  | -0.172814 | -3.326438 | O | 4.155183  | -3.998473 | 0.874185  |
| C | 3.648493  | -2.371417 | -0.240559 | C | 2.051167  | -4.159698 | 2.056798  |
| O | 3.574889  | -3.604554 | -5.141122 | O | 1.872479  | -5.506305 | 2.482417  |
| O | 4.715796  | -0.988339 | -5.628212 | H | 0.941508  | -7.156282 | -0.042182 |
| O | 3.894591  | 0.265781  | -3.364963 | H | -1.116351 | -7.663927 | -1.232992 |
| H | 3.496067  | -3.444104 | -0.115440 | H | -0.394007 | -6.890803 | -3.398760 |
| O | 2.572593  | -1.738203 | 0.457136  | H | -1.194546 | -4.717955 | -1.999249 |
| H | 4.611579  | -2.103604 | 0.209678  | H | -3.280359 | -5.516120 | -2.851192 |
| H | 2.836360  | -4.211017 | -4.941120 | H | -3.113459 | -6.245544 | -0.193524 |
| H | 4.473661  | -1.634992 | -6.307676 | H | -1.002524 | -4.146437 | 0.536612  |
| H | 2.714699  | -0.765500 | 0.444861  | H | -2.563742 | -5.986220 | 2.386357  |
| O | 3.865406  | 3.578441  | -1.756271 | H | -3.079016 | -4.325142 | 1.999602  |
| C | 3.599350  | 2.158169  | -1.816580 | H | -1.635911 | -4.554781 | 3.910603  |
| C | 4.180011  | 1.647200  | -3.144836 | H | -4.981218 | -5.246511 | -0.096706 |
| C | 3.523285  | 2.381696  | -4.317554 | H | -6.499331 | -4.007027 | -1.535438 |
| C | 3.657737  | 3.890815  | -4.150707 | H | -5.380841 | -4.400171 | -3.605516 |
| C | 3.193424  | 4.325139  | -2.752674 | H | -4.107485 | -2.321873 | -2.384506 |
| H | 2.516393  | 1.989380  | -1.822032 | H | -5.899798 | -1.199031 | -3.454744 |
| H | 5.264611  | 1.817606  | -3.162298 | H | -6.531070 | -1.580724 | -0.679687 |
| H | 2.452402  | 2.126465  | -4.310340 | H | -3.588186 | -1.939299 | 0.068467  |
| H | 4.721598  | 4.153464  | -4.239274 | H | -4.187632 | -0.315511 | 1.569880  |
| H | 3.464349  | 5.370003  | -2.571427 | H | -4.696060 | -1.774705 | 2.418925  |
| C | 4.171126  | 1.528606  | -0.536246 | H | -6.263621 | 0.221175  | 1.260079  |
| O | 4.114133  | 2.024060  | -5.556875 | H | -7.102271 | 0.346586  | -1.127055 |
| O | 2.893596  | 4.607367  | -5.116763 | H | -6.896595 | 2.337280  | -2.518994 |
| O | 1.801087  | 4.150376  | -2.667849 | H | -6.033142 | 1.213960  | -4.458009 |
| H | 4.810444  | 0.678454  | -0.775180 | H | -3.943047 | 1.635494  | -2.763186 |
| O | 3.158277  | 1.019634  | 0.335144  | H | -4.126942 | 3.836681  | -3.809983 |
| H | 4.780619  | 2.286876  | -0.028585 | H | -5.211988 | 4.036636  | -1.385342 |

|   |           |           |           |   |           |           |           |
|---|-----------|-----------|-----------|---|-----------|-----------|-----------|
| H | 4.103278  | 1.049879  | -5.616431 | H | -3.847045 | 1.618181  | -0.108999 |
| H | 3.090979  | 4.212595  | -5.979162 | H | -3.573900 | 3.574688  | 1.226265  |
| H | 2.520093  | 1.735111  | 0.558272  | H | -4.784607 | 2.524970  | 1.995358  |
| O | -0.377008 | 5.798296  | -0.200347 | H | -5.408924 | 4.812751  | 1.821808  |
| C | 0.455291  | 4.720653  | -0.687730 | H | -3.779975 | 5.558835  | -0.933095 |
| C | 1.020228  | 5.170213  | -2.043720 | H | -2.153828 | 6.748185  | -2.321965 |
| C | -0.126152 | 5.459252  | -3.017676 | H | -2.702310 | 5.744254  | -4.409758 |
| C | -1.101057 | 6.464865  | -2.414808 | H | -1.075467 | 4.009652  | -3.108117 |
| C | -1.519627 | 6.034790  | -1.001468 | H | 0.412447  | 5.340053  | -4.249854 |
| H | -0.160482 | 3.827778  | -0.843934 | H | 0.195379  | 6.178163  | -1.366814 |
| H | 1.623430  | 6.077314  | -1.905526 | H | -0.906931 | 3.420072  | -0.650031 |
| H | -0.663928 | 4.513690  | -3.187482 | H | 0.790826  | 3.654316  | 0.883595  |
| H | -0.585114 | 7.431434  | -2.324243 | H | -0.591594 | 4.381979  | 1.700712  |
| H | -2.066601 | 6.842513  | -0.504937 | H | 1.787524  | 5.485785  | 1.013161  |
| C | 1.483954  | 4.394693  | 0.409377  | H | 2.094310  | 6.299364  | -2.223571 |
| O | 0.346587  | 5.993817  | -4.243695 | H | 3.968845  | 5.442420  | -3.509901 |
| O | -2.278556 | 6.610084  | -3.204164 | H | 2.675561  | 4.339726  | -5.215241 |
| O | -2.318458 | 4.882591  | -1.104066 | H | 2.791080  | 2.667442  | -3.086027 |
| H | 2.501164  | 4.461399  | 0.021175  | H | 4.880870  | 2.189702  | -4.161071 |
| O | 1.346683  | 3.067504  | 0.915155  | H | 5.399516  | 3.776060  | -1.968555 |
| H | 1.371141  | 5.135719  | 1.210995  | H | 2.747973  | 3.182369  | -0.555319 |
| H | 1.038509  | 5.393119  | -4.581110 | H | 5.150808  | 4.677535  | 0.553249  |
| H | -1.988478 | 6.726296  | -4.121163 | H | 4.848299  | 2.943830  | 0.846193  |
| H | 0.444153  | 2.951326  | 1.286263  | H | 3.863194  | 4.490848  | 2.431340  |
| O | -4.589982 | 3.647353  | 1.513262  | H | 6.715424  | 2.203770  | -1.492979 |
| C | -3.330918 | 3.705356  | 0.803748  | H | 7.393612  | 0.030202  | -2.369960 |
| C | -3.481422 | 4.781270  | -0.282126 | H | 6.230976  | 0.164720  | -4.450027 |
| C | -4.622956 | 4.405414  | -1.231926 | H | 4.422615  | -0.617517 | -2.562102 |
| C | -5.910981 | 4.162913  | -0.452410 | H | 5.521520  | -2.719006 | -3.128557 |
| C | -5.665707 | 3.193335  | 0.712902  | H | 6.550499  | -1.877169 | -0.783193 |
| H | -3.143306 | 2.741764  | 0.316989  | H | 4.248418  | -0.027715 | 0.011031  |
| H | -3.697111 | 5.749161  | 0.189360  | H | 4.790915  | -1.534334 | 1.772134  |
| H | -4.340477 | 3.468049  | -1.735531 | H | 5.425971  | 0.079137  | 2.177093  |
| H | -6.236000 | 5.120192  | -0.020359 | H | 6.952305  | -1.726672 | 2.488978  |
| H | -6.536675 | 3.166354  | 1.375435  | H | 5.949062  | -3.732741 | 0.011590  |
| C | -2.216570 | 3.927300  | 1.841378  | H | 4.989597  | -5.770033 | -0.929502 |
| O | -4.876165 | 5.427345  | -2.182717 | H | 4.995866  | -5.116695 | -3.218400 |
| O | -6.941121 | 3.620787  | -1.274338 | H | 2.778334  | -4.016713 | -2.078480 |
| H | -1.628558 | 4.812534  | 1.595361  | H | 2.010596  | -6.168148 | -2.658362 |
| O | -1.290152 | 2.842877  | 1.890791  | H | 2.685054  | -6.091397 | 0.161901  |
| H | -2.689382 | 4.087996  | 2.818753  | H | 2.416240  | -3.047280 | 0.255623  |
| H | -4.030346 | 5.637170  | -2.623141 | H | 1.092778  | -3.633940 | 2.043079  |
| H | -6.970564 | 4.160805  | -2.078151 | H | 2.694772  | -3.651303 | 2.784143  |
| H | -1.768627 | 2.021771  | 2.140603  | H | 0.955647  | -5.741874 | 2.260300  |
| C | 4.130785  | 4.086395  | 5.323137  | C | -3.952439 | 0.883622  | 5.026011  |
| C | 4.344346  | 3.757710  | 3.984628  | C | -3.524842 | 2.194553  | 5.237945  |
| C | 4.251733  | 2.425988  | 3.582245  | C | -2.163717 | 2.490206  | 5.173992  |
| C | 3.956741  | 1.399051  | 4.491779  | C | -1.204554 | 1.502581  | 4.902370  |
| C | 3.709373  | 1.737528  | 5.836974  | C | -1.641353 | 0.184868  | 4.662601  |
| C | 3.802695  | 3.079243  | 6.230312  | C | -3.010716 | -0.102786 | 4.733535  |
| C | 3.222793  | 0.696172  | 6.828848  | C | -0.670840 | -0.891969 | 4.214653  |
| C | 1.934672  | 0.087050  | 6.325427  | C | 0.006707  | -0.458867 | 2.935809  |
| C | 0.696369  | 0.370712  | 6.902051  | C | -0.291376 | -1.039589 | 1.702177  |
| C | -0.480943 | -0.186263 | 6.392634  | C | 0.348691  | -0.619615 | 0.531559  |
| C | -0.415514 | -1.034146 | 5.287670  | C | 1.295072  | 0.402706  | 0.600448  |
| C | 0.816618  | -1.325219 | 4.695182  | C | 1.593083  | 1.007785  | 1.825640  |
| C | 1.999944  | -0.766888 | 5.201386  | C | 0.949327  | 0.590826  | 3.001658  |
| C | 4.015535  | -0.023192 | 3.936695  | C | 0.255274  | 1.946852  | 4.981016  |
| N | 3.287603  | -1.074951 | 4.685057  | N | 1.264120  | 1.116822  | 4.282383  |
| C | 5.495809  | -0.450622 | 3.827365  | C | 0.663673  | 2.051270  | 6.466873  |
| C | 3.415394  | -2.367398 | 4.002780  | C | 2.599412  | 1.704002  | 4.426737  |
| C | 4.884383  | -2.766573 | 3.907798  | C | 2.977519  | 1.806341  | 5.900500  |
| N | 5.637344  | -1.750493 | 3.175052  | N | 1.999537  | 2.620087  | 6.616782  |
| C | 7.040011  | -2.120534 | 3.023223  | C | 2.356548  | 2.790408  | 8.020141  |
| H | 4.198591  | 5.118036  | 5.655931  | H | -5.007864 | 0.632071  | 5.071990  |
| H | 4.575266  | 4.529681  | 3.256541  | H | -4.241659 | 2.981934  | 5.450626  |
| H | 4.397953  | 2.169687  | 2.536433  | H | -1.833620 | 3.512749  | 5.341354  |
| H | 3.603214  | 3.334420  | 7.267977  | H | -3.339408 | -1.121642 | 4.547308  |
| H | 3.069400  | 1.161490  | 7.806413  | H | -1.200419 | -1.835610 | 4.059185  |
| H | 3.970948  | -0.097375 | 6.944311  | H | 0.095055  | -1.054639 | 4.982911  |
| H | 0.655526  | 1.028124  | 7.767167  | H | -1.016134 | -1.848134 | 1.667644  |
| H | -1.436205 | 0.042184  | 6.856199  | H | 0.111257  | -1.088104 | -0.418754 |

|           |                |           |           |           |                |           |           |
|-----------|----------------|-----------|-----------|-----------|----------------|-----------|-----------|
| H         | -1.316963      | -1.459881 | 4.857808  | H         | 1.800374       | 0.741554  | -0.299789 |
| H         | 0.845726       | -1.980411 | 3.830636  | H         | 2.314691       | 1.816858  | 1.860272  |
| H         | 3.621023       | 0.017514  | 2.906882  | H         | 0.301152       | 2.971302  | 4.569117  |
| H         | 5.934780       | -0.449340 | 4.844734  | H         | 0.585846       | 1.043460  | 6.920670  |
| H         | 6.035764       | 0.295372  | 3.235965  | H         | -0.050434      | 2.699866  | 6.983605  |
| H         | 2.987829       | -2.342156 | 2.987896  | H         | 2.661162       | 2.706283  | 3.969446  |
| H         | 2.873453       | -3.118463 | 4.583962  | H         | 3.317205       | 1.058205  | 3.914105  |
| H         | 4.967037       | -3.721017 | 3.375799  | H         | 3.963620       | 2.276254  | 5.987906  |
| H         | 5.288422       | -2.915717 | 4.928188  | H         | 3.053935       | 0.787005  | 6.326808  |
| H         | 7.567054       | -2.223900 | 3.990146  | H         | 2.392800       | 1.835926  | 8.577761  |
| H         | 7.562193       | -1.360805 | 2.433237  | H         | 1.626704       | 3.441421  | 8.511697  |
| H         | 7.113720       | -3.075890 | 2.494292  | H         | 3.341329       | 3.262507  | 8.094658  |
| <b>M2</b> |                |           |           | <b>M2</b> |                |           |           |
| E         | -5082.94460038 |           |           | E         | -5082.92045830 |           |           |
| O         | -4.873173      | 1.353033  | -3.618664 | C         | 1.227718       | 6.101450  | -0.621565 |
| C         | -4.465587      | 0.192519  | -2.858699 | C         | 2.121732       | 6.151515  | -1.861825 |
| C         | -5.748725      | -0.550900 | -2.457413 | O         | 1.312157       | 6.409283  | -3.006094 |
| C         | -6.632016      | 0.366325  | -1.605375 | C         | 2.900393       | 4.851035  | -2.017550 |
| C         | -6.913996      | 1.668184  | -2.347224 | O         | 3.765723       | 5.026605  | -3.124095 |
| C         | -5.607669      | 2.294023  | -2.857205 | C         | 3.655978       | 4.497721  | -0.729809 |
| H         | -3.949619      | 0.517742  | -1.948089 | O         | 4.129544       | 3.155553  | -0.900703 |
| H         | -6.292439      | -0.851346 | -3.362648 | C         | 2.717213       | 4.572194  | 0.489676  |
| H         | -6.076304      | 0.603329  | -0.685210 | O         | 2.032098       | 5.842001  | 0.517385  |
| H         | -7.531959      | 1.435607  | -3.226373 | C         | 3.430015       | 4.449079  | 1.823112  |
| H         | -5.823634      | 3.121582  | -3.540144 | O         | 2.426088       | 4.349842  | 2.835653  |
| C         | -3.455521      | -0.594313 | -3.711768 | C         | 5.497371       | 2.853134  | -0.707057 |
| O         | -5.470301      | -1.692256 | -1.647615 | C         | 6.080410       | 2.263489  | -2.000838 |
| O         | -7.878350      | -0.235747 | -1.295674 | O         | 5.894234       | 3.184197  | -3.074455 |
| O         | -7.575792      | 2.623294  | -1.522650 | C         | 5.442884       | 0.915997  | -2.315736 |
| O         | -4.866481      | 2.742372  | -1.749989 | O         | 6.107113       | 0.399292  | -3.457321 |
| H         | -3.805104      | -1.613683 | -3.884345 | C         | 5.563781       | -0.003695 | -1.103927 |
| O         | -2.182509      | -0.718930 | -3.074575 | O         | 4.846826       | -1.206689 | -1.404374 |
| H         | -3.364818      | -0.092216 | -4.683183 | C         | 4.982113       | 0.666872  | 0.145088  |
| H         | -7.695287      | -1.087526 | -0.854464 | O         | 5.665381       | 1.927086  | 0.348875  |
| H         | -8.298820      | 2.155176  | -1.078913 | C         | 5.122369       | -0.179332 | 1.419496  |
| H         | -1.807660      | 0.173091  | -2.918882 | O         | 6.296842       | -0.980418 | 1.473224  |
| O         | -2.145336      | 5.210159  | -1.887592 | C         | 5.556064       | -2.420587 | -1.420812 |
| C         | -2.680618      | 3.866922  | -1.853896 | C         | 5.187324       | -3.199323 | -2.684781 |
| C         | -4.209967      | 4.006835  | -1.837254 | O         | 5.504207       | -2.398482 | -3.821231 |
| C         | -4.641831      | 4.784453  | -0.589652 | C         | 3.714489       | -3.585499 | -2.665504 |
| C         | -3.922284      | 6.127461  | -0.516994 | O         | 3.479188       | -4.374655 | -3.818840 |
| C         | -2.408785      | 5.948369  | -0.707784 | C         | 3.379914       | -4.328519 | -1.372351 |
| H         | -2.364800      | 3.371587  | -0.928773 | O         | 1.953563       | -4.450932 | -1.339767 |
| H         | -4.536967      | 4.541705  | -2.738612 | C         | 3.862564       | -3.555231 | -0.130158 |
| H         | -4.352204      | 4.187638  | 0.289079  | O         | 5.261750       | -3.201233 | -0.269721 |
| H         | -4.284643      | 6.754142  | -1.344554 | C         | 3.713096       | -4.348067 | 1.157324  |
| H         | -1.926062      | 6.920104  | -0.852388 | O         | 4.350513       | -5.613062 | 1.006311  |
| C         | -2.070904      | 3.082730  | -3.028519 | C         | 1.370077       | -5.701263 | -1.028905 |
| O         | -6.036959      | 5.040262  | -0.582845 | C         | 0.529112       | -6.177718 | -2.223430 |
| O         | -4.139378      | 6.784547  | 0.728405  | O         | 1.349444       | -6.219158 | -3.390776 |
| O         | -1.890571      | 5.298330  | 0.424882  | C         | -0.680113      | -5.273493 | -2.433062 |
| H         | -2.855493      | 2.640751  | -3.644198 | O         | -1.457323      | -5.853897 | -3.468383 |
| O         | -1.253320      | 1.993247  | -2.595107 | C         | -1.457182      | -5.138920 | -1.125794 |
| H         | -1.499951      | 3.784175  | -3.649846 | O         | -2.526685      | -4.213584 | -1.356275 |
| H         | -6.495555      | 4.186425  | -0.702309 | C         | -0.535030      | -4.650905 | -0.003081 |
| H         | -5.093313      | 6.756056  | 0.895297  | O         | 0.552012       | -5.601130 | 0.119473  |
| H         | -0.482143      | 2.346022  | -2.103317 | C         | -1.224320      | -4.527842 | 1.363224  |
| O         | 1.669758       | 5.322240  | 1.354774  | O         | -2.244790      | -5.492074 | 1.594377  |
| C         | 0.509066       | 4.787455  | 0.676268  | C         | -3.844086      | -4.674191 | -1.189134 |
| C         | -0.651075      | 5.749436  | 0.972348  | C         | -4.697781      | -4.220669 | -2.376239 |
| C         | -0.889896      | 5.814826  | 2.484589  | O         | -4.108613      | -4.702275 | -3.581080 |
| C         | 0.392691       | 6.173930  | 3.228852  | C         | -4.834079      | -2.703423 | -2.395164 |
| C         | 1.560940       | 5.290072  | 2.766201  | O         | -5.702246      | -2.385412 | -3.467226 |
| H         | 0.259215       | 3.806602  | 1.096152  | C         | -5.345983      | -2.184197 | -1.046210 |
| H         | -0.409533      | 6.750098  | 0.590327  | O         | -5.225470      | -0.757693 | -1.079164 |
| H         | -1.207561      | 4.811906  | 2.809789  | C         | -4.484665      | -2.741651 | 0.100722  |
| H         | 0.651791       | 7.213205  | 2.980271  | O         | -4.415095      | -4.183141 | 0.014697  |
| H         | 2.509238       | 5.682606  | 3.147311  | C         | -5.012075      | -2.412539 | 1.484015  |
| C         | 0.880106       | 4.573389  | -0.800213 | O         | -3.986151      | -2.742032 | 2.418582  |
| O         | -1.872841      | 6.782346  | 2.818019  | C         | -6.375292      | 0.049548  | -0.934929 |
| O         | 0.253148       | 6.022892  | 4.638319  | C         | -6.451281      | 1.035112  | -2.107439 |
| O         | 1.341368       | 3.982330  | 3.230113  | O         | -6.503270      | 0.312384  | -3.336682 |

|   |           |           |           |   |           |           |           |
|---|-----------|-----------|-----------|---|-----------|-----------|-----------|
| H | 0.113326  | 4.992698  | -1.451931 | C | -5.264726 | 1.990745  | -2.081211 |
| O | 0.976238  | 3.190331  | -1.146830 | O | -5.453983 | 2.913979  | -3.141059 |
| H | 1.824382  | 5.097259  | -0.996796 | C | -5.170249 | 2.677296  | -0.720550 |
| H | -2.654887 | 6.607931  | 2.260805  | O | -3.921625 | 3.379599  | -0.707785 |
| H | -0.559019 | 6.487542  | 4.889028  | C | -5.212956 | 1.654096  | 0.428809  |
| H | 1.711397  | 2.786682  | -0.632768 | O | -6.347146 | 0.773846  | 0.278466  |
| O | 3.950926  | 1.375031  | 3.389861  | C | -5.313659 | 2.304377  | 1.798669  |
| C | 2.964928  | 2.198619  | 2.726891  | O | -6.422090 | 3.200568  | 1.814747  |
| C | 2.441332  | 3.227224  | 3.742057  | C | -3.891736 | 4.718262  | -0.252826 |
| C | 1.870132  | 2.512588  | 4.968486  | C | -3.408709 | 5.629446  | -1.392011 |
| C | 2.891095  | 1.548208  | 5.556096  | O | -4.237970 | 5.432228  | -2.537053 |
| C | 3.441312  | 0.615286  | 4.465856  | C | -1.944048 | 5.363986  | -1.720704 |
| H | 2.122419  | 1.574137  | 2.408247  | O | -1.556310 | 6.326804  | -2.688288 |
| H | 3.252768  | 3.899899  | 4.050560  | C | -1.106510 | 5.444155  | -0.446054 |
| H | 0.997148  | 1.930645  | 4.635519  | O | 0.243197  | 5.112781  | -0.794153 |
| H | 3.737988  | 2.131703  | 5.944132  | C | -1.657845 | 4.482629  | 0.611820  |
| H | 4.291675  | 0.045875  | 4.853778  | O | -3.036119 | 4.853484  | 0.863668  |
| C | 3.638030  | 2.773904  | 1.472998  | C | -0.897769 | 4.511399  | 1.943333  |
| O | 1.498406  | 3.434303  | 5.982073  | O | -0.401398 | 5.793381  | 2.309474  |
| O | 2.332018  | 0.751193  | 6.597273  | H | 0.770321  | 7.078223  | -0.439028 |
| O | 2.417869  | -0.252559 | 4.039029  | H | 2.838172  | 6.972347  | -1.717339 |
| H | 3.409361  | 3.832941  | 1.358382  | H | 1.857763  | 6.208355  | -3.781834 |
| O | 3.188895  | 2.142345  | 0.271892  | H | 2.179889  | 4.040773  | -2.206667 |
| H | 4.723567  | 2.662652  | 1.590636  | H | 4.369237  | 4.256691  | -3.173514 |
| H | 0.932706  | 4.109494  | 5.563564  | H | 4.499963  | 5.188287  | -0.603415 |
| H | 1.836859  | 1.349029  | 7.176939  | H | 1.978687  | 3.766252  | 0.405155  |
| H | 3.200806  | 1.162562  | 0.407434  | H | 4.058896  | 5.335672  | 1.977030  |
| O | 2.811319  | -3.530821 | 2.396605  | H | 4.073394  | 3.560868  | 1.808887  |
| C | 2.583935  | -2.101274 | 2.432406  | H | 2.838901  | 4.530631  | 3.690372  |
| C | 2.723379  | -1.640888 | 3.892971  | H | 6.050682  | 3.749735  | -0.410952 |
| C | 1.750377  | -2.401390 | 4.792244  | H | 7.155342  | 2.108339  | -1.833247 |
| C | 1.965047  | -3.899585 | 4.629331  | H | 6.089421  | 2.690490  | -3.886744 |
| C | 1.893245  | -4.301067 | 3.148119  | H | 4.373863  | 1.072441  | -2.524147 |
| H | 1.572646  | -1.881912 | 2.071957  | H | 5.735947  | -0.483674 | -3.654920 |
| H | 3.750626  | -1.836285 | 4.228773  | H | 6.618815  | -0.231694 | -0.916895 |
| H | 0.726107  | -2.154656 | 4.473565  | H | 3.917094  | 0.871585  | -0.013737 |
| H | 2.974372  | -4.145363 | 4.988319  | H | 4.224630  | -0.798811 | 1.521572  |
| H | 2.208753  | -5.341232 | 3.020984  | H | 5.141684  | 0.505527  | 2.273231  |
| C | 3.588214  | -1.452318 | 1.458141  | H | 6.070128  | -1.838642 | 1.076904  |
| O | 1.937650  | -2.098465 | 6.164915  | H | 6.634873  | -2.242278 | -1.384129 |
| O | 0.999720  | -4.646473 | 5.367340  | H | 5.789741  | -4.118242 | -2.696046 |
| O | 0.575248  | -4.122426 | 2.678067  | H | 5.068806  | -2.812429 | -4.581944 |
| H | 4.357708  | -0.906582 | 2.012472  | H | 3.112393  | -2.664396 | -2.691500 |
| O | 2.951572  | -0.537840 | 0.570433  | H | 2.623900  | -4.838116 | -3.708605 |
| H | 4.079731  | -2.258391 | 0.902328  | H | 3.849310  | -5.317430 | -1.389447 |
| H | 1.869664  | -1.129667 | 6.276334  | H | 3.267821  | -2.638106 | -0.039534 |
| H | 0.948054  | -4.229267 | 6.241572  | H | 2.640661  | -4.462449 | 1.358539  |
| H | 2.897103  | -0.902480 | -0.360918 | H | 4.157347  | -3.770491 | 1.980244  |
| O | -1.165876 | -6.118117 | 0.105339  | H | 4.148734  | -6.138348 | 1.791598  |
| C | -0.291745 | -5.079792 | 0.591793  | H | 2.144969  | -6.431830 | -0.779111 |
| C | -0.126623 | -5.238054 | 2.114832  | H | 0.167895  | -7.189302 | -1.991029 |
| C | -1.493262 | -5.268591 | 2.810096  | H | 0.744924  | -6.356472 | -4.137082 |
| C | -2.422224 | -6.282788 | 2.151091  | H | -0.324720 | -4.274035 | -2.726536 |
| C | -2.474133 | -6.056745 | 0.638104  | H | -2.260804 | -5.310313 | -3.590394 |
| H | -0.746988 | -4.102623 | 0.388045  | H | -1.863594 | -6.113263 | -0.834131 |
| H | 0.408798  | -6.171589 | 2.333568  | H | -0.112885 | -3.672809 | -0.265312 |
| H | -1.940312 | -4.268967 | 2.698212  | H | -1.626760 | -3.516274 | 1.469183  |
| H | -2.015368 | -7.289224 | 2.322661  | H | -0.450072 | -4.657080 | 2.128459  |
| H | -3.034631 | -6.857838 | 0.145680  | H | -3.085341 | -5.058022 | 1.369881  |
| C | 1.018835  | -5.185586 | -0.179140 | H | -3.865824 | -5.763930 | -1.097407 |
| O | -1.394696 | -5.627157 | 4.177386  | H | -5.697627 | -4.659087 | -2.247852 |
| O | -3.747170 | -6.197114 | 2.672283  | H | -4.518380 | -4.201914 | -4.303774 |
| O | -3.075837 | -4.806946 | 0.400755  | H | -3.836044 | -2.268288 | -2.555895 |
| H | 1.723496  | -4.461447 | 0.251110  | H | -5.822704 | -1.413609 | -3.489882 |
| O | 0.867956  | -5.001315 | -1.579775 | H | -6.395470 | -2.477777 | -0.913387 |
| H | 1.441628  | -6.187408 | -0.036950 | H | -3.474787 | -2.326472 | 0.002803  |
| H | -0.676865 | -5.100752 | 4.584217  | H | -5.925452 | -2.995222 | 1.671607  |
| H | -3.663268 | -6.146299 | 3.636426  | H | -5.267976 | -1.347555 | 1.520342  |
| H | 0.257162  | -4.257579 | -1.750650 | H | -4.238807 | -2.408190 | 3.290231  |
| O | -4.645094 | -3.603438 | -2.693717 | H | -7.277017 | -0.569372 | -0.891388 |
| C | -3.570326 | -3.746096 | -1.738354 | H | -7.373908 | 1.619022  | -1.984838 |
| C | -4.055769 | -4.688510 | -0.629416 | H | -6.322175 | 0.954909  | -4.040135 |

|            |                |           |           |            |                |           |           |
|------------|----------------|-----------|-----------|------------|----------------|-----------|-----------|
| C          | -5.309087      | -4.110431 | 0.036300  | H          | -4.344055      | 1.406774  | -2.232520 |
| C          | -6.375547      | -3.806950 | -1.011185 | H          | -4.857562      | 3.676518  | -2.996093 |
| C          | -5.787271      | -2.966243 | -2.152899 | H          | -6.003648      | 3.379046  | -0.611482 |
| H          | -3.352973      | -2.769289 | -1.292364 | H          | -4.290444      | 1.061019  | 0.402633  |
| H          | -4.284182      | -5.674521 | -1.055300 | H          | -4.372105      | 2.833211  | 1.992083  |
| H          | -5.020322      | -3.164786 | 0.520027  | H          | -5.427115      | 1.513080  | 2.552914  |
| H          | -6.713591      | -4.758902 | -1.445181 | H          | -6.393252      | 3.685894  | 2.649581  |
| H          | -6.502477      | -2.889637 | -2.977842 | H          | -4.882889      | 5.022291  | 0.096214  |
| C          | -2.316285      | -4.197556 | -2.502920 | H          | -3.500103      | 6.668523  | -1.045507 |
| O          | -5.872654      | -5.004763 | 0.981660  | H          | -3.792736      | 5.886737  | -3.269465 |
| O          | -7.482949      | -3.099918 | -0.459348 | H          | -1.853892      | 4.345258  | -2.127642 |
| H          | -1.956446      | -5.162083 | -2.139748 | H          | -0.611867      | 6.187435  | -2.898882 |
| O          | -1.225184      | -3.294762 | -2.332026 | H          | -1.146763      | 6.459409  | -0.037184 |
| H          | -2.582491      | -4.304801 | -3.562515 | H          | -1.634510      | 3.453171  | 0.234452  |
| H          | -5.176433      | -5.233451 | 1.628342  | H          | -0.085184      | 3.781375  | 1.893562  |
| H          | -7.720250      | -3.551144 | 0.364577  | H          | -1.594508      | 4.173576  | 2.720094  |
| H          | -1.486673      | -2.402384 | -2.642738 | H          | 0.541386       | 5.800288  | 2.073181  |
| C          | 6.642616       | 3.500347  | -4.123866 | C          | 3.894354       | -0.349872 | 5.720422  |
| C          | 6.037474       | 3.426185  | -2.869408 | C          | 3.642938       | 0.907196  | 5.170077  |
| C          | 5.530323       | 2.207655  | -2.420601 | C          | 2.515969       | 1.095739  | 4.370598  |
| C          | 5.608218       | 1.045599  | -3.204748 | C          | 1.624118       | 0.046150  | 4.098280  |
| C          | 6.227335       | 1.119712  | -4.467339 | C          | 1.871051       | -1.217838 | 4.667322  |
| C          | 6.737656       | 2.349653  | -4.904888 | C          | 3.004874       | -1.394279 | 5.472241  |
| C          | 6.440042       | -0.120551 | -5.315099 | C          | 0.882633       | -2.356998 | 4.505286  |
| C          | 7.265348       | -1.129925 | -4.553964 | C          | -0.466183      | -1.959782 | 5.056104  |
| C          | 8.588742       | -1.417311 | -4.889190 | C          | -0.981654      | -2.509724 | 6.230439  |
| C          | 9.330126       | -2.355001 | -4.164121 | C          | -2.238118      | -2.134882 | 6.714920  |
| C          | 8.737866       | -3.006914 | -3.083863 | C          | -2.984051      | -1.186957 | 6.015562  |
| C          | 7.417840       | -2.720121 | -2.725988 | C          | -2.475552      | -0.613261 | 4.846589  |
| C          | 6.669704       | -1.780164 | -3.450751 | C          | -1.214778      | -0.988797 | 4.354110  |
| C          | 4.922334       | -0.193680 | -2.626058 | C          | 0.495927       | 0.367299  | 3.119015  |
| N          | 5.297125       | -1.512903 | -3.186398 | N          | -0.696546      | -0.510444 | 3.121743  |
| C          | 3.395950       | -0.016584 | -2.774744 | C          | 1.075815       | 0.383189  | 1.687298  |
| C          | 4.559132       | -2.587784 | -2.517952 | C          | -1.685456      | -0.027906 | 2.153906  |
| C          | 3.057167       | -2.392205 | -2.681367 | C          | -1.091314      | -0.014495 | 0.750150  |
| N          | 2.653968       | -1.098649 | -2.108885 | N          | 0.095854       | 0.834263  | 0.702927  |
| C          | 1.205893       | -0.884597 | -2.214077 | C          | 0.668574       | 0.880176  | -0.638297 |
| H          | 7.045734       | 4.440717  | -4.488251 | H          | 4.765883       | -0.513991 | 6.347279  |
| H          | 5.961375       | 4.308552  | -2.240863 | H          | 4.314173       | 1.738495  | 5.364548  |
| H          | 5.041948       | 2.159739  | -1.449859 | H          | 2.328169       | 2.075655  | 3.937286  |
| H          | 7.223500       | 2.397052  | -5.876036 | H          | 3.183741       | -2.370451 | 5.915555  |
| H          | 6.939527       | 0.153111  | -6.248292 | H          | 1.256665       | -3.245073 | 5.021622  |
| H          | 5.473574       | -0.572114 | -5.570709 | H          | 0.770076       | -2.608184 | 3.443000  |
| H          | 9.038182       | -0.912069 | -5.740389 | H          | -0.397631      | -3.257226 | 6.761524  |
| H          | 10.355376      | -2.575308 | -4.445817 | H          | -2.628722      | -2.582658 | 7.623629  |
| H          | 9.299989       | -3.738218 | -2.510121 | H          | -3.960395      | -0.880314 | 6.380027  |
| H          | 6.975864       | -3.231110 | -1.877786 | H          | -3.062182      | 0.134514  | 4.324228  |
| H          | 5.135373       | -0.199011 | -1.541757 | H          | 0.167670       | 1.399086  | 3.338560  |
| H          | 3.146030       | 0.028370  | -3.848507 | H          | 1.452518       | -0.633512 | 1.456783  |
| H          | 3.101183       | 0.933352  | -2.321739 | H          | 1.928943       | 1.067048  | 1.664369  |
| H          | 4.796339       | -2.646167 | -1.440680 | H          | -2.037716      | 0.989505  | 2.400073  |
| H          | 4.847304       | -3.539448 | -2.971357 | H          | -2.540521      | -0.706770 | 2.175282  |
| H          | 2.516589       | -3.197758 | -2.175046 | H          | -1.833116      | 0.374969  | 0.043856  |
| H          | 2.799089       | -2.434875 | -3.753483 | H          | -0.856601      | -1.053934 | 0.446704  |
| H          | 0.856216       | -0.882723 | -3.258189 | H          | 0.998030       | -0.112554 | -0.998443 |
| H          | 0.947123       | 0.076394  | -1.761683 | H          | 1.534493       | 1.548839  | -0.653044 |
| H          | 0.679919       | -1.674509 | -1.673866 | H          | -0.074031      | 1.267031  | -1.342866 |
| <b>FA2</b> |                |           |           | <b>FA2</b> |                |           |           |
| E          | -5082.94134191 |           |           | E          | -5082.93271690 |           |           |
|            |                |           |           | ZPE        | -5081.371176   |           |           |
|            |                |           |           | H          | -5081.277347   |           |           |
|            |                |           |           | G          | -5081.504693   |           |           |
|            |                |           |           | S          | 478.490        |           |           |
| O          | 1.990859       | -5.200739 | -0.746230 | C          | 5.854599       | 3.332457  | 1.735230  |
| C          | 0.678915       | -4.653711 | -0.480013 | C          | 6.945971       | 2.788244  | 0.809067  |
| C          | -0.338081      | -5.571515 | -1.175273 | O          | 6.969036       | 3.572614  | -0.380582 |
| C          | -0.058791      | -5.612677 | -2.680958 | C          | 6.708937       | 1.313061  | 0.504217  |
| C          | 1.386686       | -6.019206 | -2.946132 | O          | 7.825732       | 0.853974  | -0.236913 |
| C          | 2.352207       | -5.162554 | -2.114496 | C          | 6.491223       | 0.497370  | 1.787419  |
| C          | 0.605810       | -3.653507 | -0.921912 | O          | 6.029157       | -0.783481 | 1.345166  |
| H          | -0.260827      | -6.584266 | -0.758279 | C          | 5.437092       | 1.178255  | 2.676707  |
| H          | -0.211598      | -4.596201 | -3.075243 | O          | 5.813580       | 2.546479  | 2.909232  |

|   |           |           |           |   |           |           |           |
|---|-----------|-----------|-----------|---|-----------|-----------|-----------|
| H | 1.513699  | -7.062948 | -2.624881 | C | 5.245919  | 0.556767  | 4.045991  |
| H | 3.365001  | -5.574831 | -2.163131 | O | 4.100079  | 1.185404  | 4.630260  |
| C | 0.538890  | -4.507176 | 1.045390  | C | 6.607002  | -1.966026 | 1.852613  |
| O | -1.674892 | -5.087014 | -1.047251 | C | 7.156173  | -2.795949 | 0.681664  |
| O | -0.899739 | -6.540039 | -3.347923 | O | 8.081189  | -2.001625 | -0.059677 |
| O | 1.738888  | -5.882543 | -4.320034 | C | 6.022619  | -3.297897 | -0.205588 |
| O | 2.324985  | -3.848833 | -2.613920 | O | 6.599308  | -4.157629 | -1.175335 |
| H | -0.339050 | -5.042326 | 1.409745  | C | 4.969230  | -4.004810 | 0.644752  |
| O | 0.364415  | -3.148199 | 1.452529  | O | 3.884631  | -4.344236 | -0.226770 |
| H | 1.430000  | -4.945326 | 1.511634  | C | 4.493385  | -3.092125 | 1.780401  |
| H | -1.822638 | -6.326934 | -3.110602 | O | 5.651374  | -2.725393 | 2.568915  |
| H | 1.027996  | -6.294869 | -4.833097 | C | 3.452964  | -3.736952 | 2.706436  |
| H | 1.120437  | -2.610666 | 1.126221  | O | 3.620777  | -5.135138 | 2.907025  |
| O | 4.922706  | -1.317707 | -2.002543 | C | 3.519067  | -5.695860 | -0.348243 |
| C | 3.671437  | -1.989331 | -1.729332 | C | 3.341779  | -6.032810 | -1.830053 |
| C | 3.557490  | -3.139195 | -2.740669 | O | 4.570620  | -5.766473 | -2.503021 |
| C | 3.560767  | -2.574371 | -4.164942 | C | 2.191535  | -5.231646 | -2.424666 |
| C | 4.786399  | -1.694757 | -4.392847 | O | 2.020940  | -5.671531 | -3.761640 |
| C | 4.939597  | -0.668175 | -3.260690 | C | 0.923132  | -5.414017 | -1.591213 |
| H | 2.842434  | -1.293969 | -1.901159 | O | -0.006078 | -4.441886 | -2.081330 |
| H | 4.404845  | -3.825560 | -2.612582 | C | 1.181256  | -5.175731 | -0.091535 |
| H | 2.661051  | -1.949426 | -4.274901 | O | 2.312545  | -5.965358 | 0.354851  |
| H | 5.677654  | -2.338246 | -4.373920 | C | -0.008769 | -5.533322 | 0.782486  |
| H | 5.912888  | -0.171515 | -3.325809 | O | -0.424400 | -6.864646 | 0.492039  |
| C | 3.649029  | -2.370694 | -0.240244 | C | -1.347155 | -4.817043 | -2.324804 |
| O | 3.576494  | -3.603894 | -5.140785 | C | -1.657281 | -4.622849 | -3.818070 |
| O | 4.716844  | -0.987396 | -5.627751 | O | -0.712272 | -5.357893 | -4.595613 |
| O | 3.894929  | 0.266567  | -3.364702 | C | -1.631866 | -3.143392 | -4.180705 |
| H | 3.496700  | -3.443402 | -0.115183 | O | -2.025857 | -3.035162 | -5.542279 |
| O | 2.573015  | -1.737602 | 0.457398  | C | -2.544881 | -2.356188 | -3.240002 |
| H | 4.612056  | -2.102812 | 0.210071  | O | -2.420031 | -0.970931 | -3.571366 |
| H | 2.837983  | -4.210441 | -4.940981 | C | -2.129952 | -2.609556 | -1.786125 |
| H | 4.475263  | -1.634174 | -6.307293 | O | -2.230422 | -4.035252 | -1.546152 |
| H | 2.714993  | -0.764881 | 0.445070  | C | -2.969219 | -1.881979 | -0.736287 |
| O | 3.864786  | 3.579297  | -1.756165 | O | -4.363124 | -1.890904 | -1.008678 |
| C | 3.599088  | 2.158952  | -1.816430 | C | -3.497801 | -0.384963 | -4.264509 |
| C | 4.179970  | 1.648072  | -3.144615 | C | -2.952801 | 0.547495  | -5.348888 |
| C | 3.523131  | 2.382345  | -4.317408 | O | -2.093163 | -0.202208 | -6.203762 |
| C | 3.657199  | 3.891503  | -4.150632 | C | -2.229782 | 1.736400  | -4.724564 |
| C | 3.192698  | 4.325791  | -2.752648 | O | -1.885793 | 2.616458  | -5.780600 |
| H | 2.516175  | 1.989895  | -1.821950 | C | -3.089077 | 2.423080  | -3.650683 |
| H | 5.264529  | 1.818757  | -3.162028 | O | -2.206982 | 3.329030  | -2.976785 |
| H | 2.452314  | 2.126838  | -4.310257 | C | -3.642889 | 1.380065  | -2.666172 |
| H | 4.721004  | 4.154407  | -4.239131 | O | -4.333571 | 0.352369  | -3.398819 |
| H | 3.463380  | 5.370728  | -2.571449 | C | -4.628994 | 1.898213  | -1.635630 |
| C | 4.170920  | 1.529604  | -0.536004 | O | -4.838712 | 0.864913  | -0.678398 |
| O | 4.114145  | 2.024799  | -5.556675 | C | -2.566478 | 4.682479  | -2.809996 |
| O | 2.892946  | 4.607818  | -5.116777 | C | -1.474312 | 5.570339  | -3.419653 |
| O | 1.800394  | 4.150746  | -2.667934 | O | -1.326666 | 5.247817  | -4.802717 |
| H | 4.810559  | 0.679661  | -0.774826 | C | -0.159480 | 5.391974  | -2.670863 |
| O | 3.158125  | 1.020338  | 0.335260  | O | 0.763187  | 6.320459  | -3.218591 |
| H | 4.780085  | 2.288117  | -0.028312 | C | -0.360506 | 5.593857  | -1.170402 |
| H | 4.103613  | 1.050612  | -5.616155 | O | 0.861082  | 5.172905  | -0.551810 |
| H | 3.090451  | 4.213016  | -5.979136 | C | -1.541141 | 4.759346  | -0.641910 |
| H | 2.519738  | 1.735647  | 0.558351  | O | -2.717692 | 5.004547  | -1.442169 |
| O | -0.378115 | 5.798215  | -0.200465 | C | -1.891913 | 5.069884  | 0.803354  |
| C | 0.454397  | 4.720713  | -0.687809 | O | -2.095660 | 6.473396  | 0.949735  |
| C | 1.019296  | 5.170386  | -2.043775 | C | 1.437049  | 5.971900  | 0.460884  |
| C | -0.127125 | 5.459185  | -3.017758 | C | 2.831638  | 6.431245  | 0.005873  |
| C | -1.102235 | 6.464618  | -2.414938 | O | 2.721261  | 7.097598  | -1.251762 |
| C | -1.520778 | 6.034457  | -1.001622 | C | 3.785318  | 5.246122  | -0.083693 |
| H | -0.161218 | 3.827735  | -0.844036 | O | 5.070181  | 5.764119  | -0.400046 |
| H | 1.622297  | 6.077620  | -1.905563 | C | 3.774668  | 4.463085  | 1.229454  |
| H | -0.664701 | 4.513512  | -3.187574 | O | 4.619355  | 3.320264  | 1.060175  |
| H | -0.586465 | 7.431279  | -2.324327 | C | 2.341052  | 4.041118  | 1.571251  |
| H | -2.067932 | 6.842072  | -0.505111 | O | 1.543720  | 5.246594  | 1.669680  |
| C | 1.483044  | 4.394923  | 0.409363  | C | 2.194441  | 3.261136  | 2.877996  |
| O | 0.345533  | 5.993818  | -4.243781 | O | 2.988522  | 3.769051  | 3.939630  |
| O | -2.279719 | 6.609639  | -3.204359 | H | 6.105774  | 4.344909  | 2.064615  |
| O | -2.319342 | 4.882092  | -1.104236 | H | 7.902455  | 2.883061  | 1.342340  |
| H | 2.500271  | 4.461828  | 0.021241  | H | 7.539030  | 3.113769  | -1.015191 |
| O | 1.345961  | 3.067695  | 0.915098  | H | 5.784902  | 1.231774  | -0.088590 |

|   |           |           |           |   |           |           |           |
|---|-----------|-----------|-----------|---|-----------|-----------|-----------|
| H | 1.370022  | 5.135904  | 1.210991  | H | 7.761466  | -0.119353 | -0.316378 |
| H | 1.037592  | 5.393263  | -4.581160 | H | 7.443084  | 0.398644  | 2.325262  |
| H | -1.989612 | 6.725588  | -4.121384 | H | 4.478229  | 1.145742  | 2.145635  |
| H | 0.443430  | 2.951338  | 1.286149  | H | 6.143845  | 0.727296  | 4.654557  |
| O | -4.590733 | 3.646366  | 1.512976  | H | 5.090432  | -0.523509 | 3.940238  |
| C | -3.331658 | 3.704617  | 0.803510  | H | 4.028922  | 0.903431  | 5.551684  |
| C | -3.482325 | 4.780524  | -0.282346 | H | 7.404461  | -1.733858 | 2.565444  |
| C | -4.623749 | 4.404489  | -1.232205 | H | 7.674136  | -3.666485 | 1.107764  |
| C | -5.911755 | 4.161712  | -0.452742 | H | 8.265512  | -2.493107 | -0.875284 |
| C | -5.666342 | 3.192161  | 0.712561  | H | 5.545843  | -2.431127 | -0.687769 |
| H | -3.143845 | 2.741068  | 0.316742  | H | 5.878618  | -4.529325 | -1.721440 |
| H | -3.698215 | 5.748365  | 0.189155  | H | 5.395832  | -4.912951 | 1.084822  |
| H | -4.341074 | 3.467204  | -1.735846 | H | 4.055281  | -2.178494 | 1.361385  |
| H | -6.236977 | 5.118920  | -0.020684 | H | 2.455772  | -3.516780 | 2.309089  |
| H | -6.537338 | 3.165009  | 1.375052  | H | 3.530940  | -3.245082 | 3.681705  |
| C | -2.217389 | 3.926763  | 1.841179  | H | 3.097706  | -5.581084 | 2.219467  |
| O | -4.877104 | 5.426416  | -2.182958 | H | 4.273010  | -6.346955 | 0.104126  |
| O | -6.941756 | 3.619375  | -1.274705 | H | 3.099709  | -7.102292 | -1.901094 |
| O | -5.404078 | 1.917322  | 0.181791  | H | 4.377290  | -5.785123 | -3.452562 |
| H | -1.629503 | 4.812078  | 1.595149  | H | 2.462116  | -4.165296 | -2.395086 |
| O | -1.290801 | 2.842483  | 1.890677  | H | 1.146969  | -5.363708 | -4.077052 |
| H | -2.690265 | 4.087423  | 2.818528  | H | 0.534070  | -6.426752 | -1.738225 |
| H | -4.031312 | 5.636411  | -2.623348 | H | 1.406839  | -4.112866 | 0.055752  |
| H | -6.971518 | 4.159589  | -2.078374 | H | -0.807446 | -4.810555 | 0.573962  |
| H | -1.769147 | 2.021290  | 2.140438  | H | 0.284505  | -5.425531 | 1.836367  |
| O | -5.642986 | -1.239973 | 2.057012  | H | -1.241857 | -7.028881 | 0.980166  |
| C | -4.948267 | -0.079633 | 1.543818  | H | -1.515890 | -5.853497 | -2.018199 |
| C | -5.990590 | 0.777017  | 0.809444  | H | -2.669029 | -5.011181 | -4.001622 |
| C | -6.620966 | -0.031236 | -0.328926 | H | -0.827389 | -5.049100 | -5.508517 |
| C | -7.191474 | -1.344323 | 0.195494  | H | -0.605848 | -2.770236 | -4.048749 |
| C | -6.149631 | -2.088217 | 1.043721  | H | -1.876536 | -2.112809 | -5.826393 |
| H | -4.189521 | -0.399833 | 0.820902  | H | -3.584916 | -2.678960 | -3.357071 |
| H | -6.770841 | 1.091898  | 1.515026  | H | -1.085942 | -2.305029 | -1.639861 |
| H | -5.823102 | -0.263878 | -1.050993 | H | -2.601069 | -0.854071 | -0.660628 |
| H | -8.042635 | -1.111358 | 0.851233  | H | -2.772592 | -2.370395 | 0.228140  |
| H | -6.615770 | -2.928875 | 1.567292  | H | -4.641507 | -0.952595 | -1.066998 |
| C | -4.218539 | 0.588070  | 2.722393  | H | -4.134000 | -1.154856 | -4.710838 |
| O | -7.673821 | 0.680781  | -0.959132 | H | -3.814913 | 0.925181  | -5.916782 |
| O | -7.606206 | -2.208231 | -0.859182 | H | -1.641930 | 0.429682  | -6.782650 |
| O | -5.123378 | -2.538350 | 0.194621  | H | -1.327353 | 1.358624  | -4.219752 |
| H | -4.486730 | 1.642588  | 2.796783  | H | -1.523450 | 3.437715  | -5.390325 |
| O | -2.798766 | 0.555148  | 2.580585  | H | -3.908728 | 2.972426  | -4.132081 |
| H | -4.534656 | 0.085608  | 3.645638  | H | -2.791731 | 0.940751  | -2.132526 |
| H | -7.325135 | 1.555908  | -1.215617 | H | -5.565605 | 2.172160  | -2.141901 |
| H | -8.141938 | -1.673727 | -1.464046 | H | -4.217407 | 2.800378  | -1.164360 |
| H | -2.503958 | -0.380201 | 2.519457  | H | -5.667484 | 1.046674  | -0.149451 |
| O | -2.721175 | -5.200140 | 1.029625  | H | -3.535630 | 4.886640  | -3.276205 |
| C | -3.177795 | -3.829291 | 0.968327  | H | -1.800036 | 6.614462  | -3.315827 |
| C | -4.598976 | -3.852347 | 0.385920  | H | -0.517440 | 5.691386  | -5.100692 |
| C | -4.581278 | -4.486935 | -1.007812 | H | 0.188178  | 4.359416  | -2.826728 |
| C | -3.932204 | -5.865768 | -0.961461 | H | 1.520047  | 6.398936  | -2.603267 |
| C | -2.576819 | -5.804326 | -0.241765 | H | -0.546184 | 6.653875  | -0.968393 |
| H | -2.533018 | -3.260851 | 0.288472  | H | -1.276148 | 3.696739  | -0.704440 |
| H | -5.257896 | -4.431270 | 1.046600  | H | -1.065734 | 4.720251  | 1.434904  |
| H | -3.974136 | -3.839613 | -1.659267 | H | -2.794866 | 4.503457  | 1.071401  |
| H | -4.583155 | -6.532486 | -0.378085 | H | -2.204280 | 6.655871  | 1.892191  |
| H | -2.203870 | -6.815031 | -0.048088 | H | 0.794050  | 6.828404  | 0.683762  |
| C | -3.025681 | -3.227349 | 2.375120  | H | 3.215078  | 7.130419  | 0.762464  |
| O | -5.890364 | -4.638429 | -1.533020 | H | 3.629762  | 7.192336  | -1.579520 |
| O | -3.721110 | -6.403299 | -2.264228 | H | 3.434241  | 4.575902  | -0.882061 |
| H | -3.968284 | -2.802143 | 2.721244  | H | 5.666233  | 5.009825  | -0.572773 |
| O | -2.079317 | -2.158086 | 2.416164  | H | 4.147780  | 5.086681  | 2.048729  |
| H | -2.736848 | -4.034072 | 3.060382  | H | 1.933452  | 3.418519  | 0.764823  |
| H | -6.334223 | -3.771001 | -1.472012 | H | 2.439535  | 2.213377  | 2.679272  |
| H | -4.550361 | -6.290174 | -2.752149 | H | 1.131517  | 3.298662  | 3.155624  |
| H | -1.209935 | -2.477252 | 2.086361  | H | 3.595166  | 3.051267  | 4.196679  |
| C | 4.129968  | 4.087256  | 5.322677  | C | -6.708177 | -4.671176 | 3.450981  |
| C | 4.343621  | 3.758259  | 3.984261  | C | -6.206397 | -4.307603 | 2.201299  |
| C | 4.251023  | 2.426443  | 3.582177  | C | -5.972512 | -2.962522 | 1.916096  |
| C | 3.955962  | 1.399723  | 4.491928  | C | -6.239188 | -1.959087 | 2.861060  |
| C | 3.708497  | 1.738515  | 5.837027  | C | -6.724941 | -2.328012 | 4.130114  |
| C | 3.801800  | 3.080317  | 6.230064  | C | -6.951129 | -3.683220 | 4.404717  |

|            |                |           |           |            |                |           |           |
|------------|----------------|-----------|-----------|------------|----------------|-----------|-----------|
| C          | 3.221830       | 0.697379  | 6.829083  | C          | -6.894290      | -1.298140 | 5.231644  |
| C          | 1.933747       | 0.088146  | 6.325704  | C          | -5.568983      | -0.629540 | 5.512806  |
| C          | 0.695410       | 0.371927  | 6.902201  | C          | -4.842988      | -0.872890 | 6.678892  |
| C          | -0.481855      | -0.185228 | 6.392894  | C          | -3.616127      | -0.243632 | 6.911378  |
| C          | -0.416373      | -1.033423 | 5.288161  | C          | -3.106841      | 0.634856  | 5.956486  |
| C          | 0.815781       | -1.324595 | 4.695787  | C          | -3.813570      | 0.878367  | 4.775853  |
| C          | 1.999076       | -0.766066 | 5.201880  | C          | -5.046069      | 0.251002  | 4.538971  |
| C          | 4.014823       | -0.022652 | 3.937201  | C          | -6.051725      | -0.522012 | 2.378118  |
| N          | 3.286741       | -1.074237 | 4.685654  | N          | -5.848596      | 0.530831  | 3.400670  |
| C          | 5.495113       | -0.450132 | 3.828237  | C          | -7.275914      | -0.128008 | 1.523009  |
| C          | 3.414598       | -2.366808 | 4.003640  | C          | -5.630996      | 1.827763  | 2.755710  |
| C          | 4.883591       | -2.766056 | 3.908991  | C          | -6.847045      | 2.210688  | 1.918810  |
| N          | 5.636740       | -1.750138 | 3.176214  | N          | -7.098681      | 1.189289  | 0.891460  |
| C          | 7.039427       | -2.120259 | 3.024744  | C          | -8.254611      | 1.535873  | 0.057086  |
| H          | 4.197758       | 5.118974  | 5.655240  | H          | -6.894418      | -5.714444 | 3.688909  |
| H          | 4.574596       | 4.530057  | 3.256008  | H          | -5.992010      | -5.064790 | 1.452733  |
| H          | 4.397299       | 2.169898  | 2.536434  | H          | -5.572835      | -2.680836 | 0.943200  |
| H          | 3.602244       | 3.335733  | 7.267656  | H          | -7.317346      | -3.963266 | 5.389103  |
| H          | 3.068371       | 1.162903  | 7.806541  | H          | -7.275395      | -1.782603 | 6.134572  |
| H          | 3.969971       | -0.096151 | 6.944772  | H          | -7.620043      | -0.533810 | 4.927304  |
| H          | 0.654515       | 1.029563  | 7.767145  | H          | -5.253230      | -1.551460 | 7.422625  |
| H          | -1.437143      | 0.043303  | 6.856364  | H          | -3.070286      | -0.435660 | 7.830179  |
| H          | -1.317834      | -1.459339 | 4.858504  | H          | -2.154643      | 1.131069  | 6.121147  |
| H          | 0.845066       | -1.980047 | 3.831444  | H          | -3.398445      | 1.556628  | 4.038363  |
| H          | 3.620502       | 0.017812  | 2.907305  | H          | -5.179190      | -0.527634 | 1.702648  |
| H          | 5.933897       | -0.448649 | 4.845686  | H          | -8.175737      | -0.143386 | 2.161705  |
| H          | 6.035186       | 0.295732  | 3.236781  | H          | -7.412342      | -0.870004 | 0.731594  |
| H          | 2.987209       | -2.341734 | 2.988672  | H          | -4.739044      | 1.823880  | 2.105614  |
| H          | 2.872542       | -3.117757 | 4.584863  | H          | -5.480565      | 2.583193  | 3.530437  |
| H          | 4.966300       | -3.720597 | 3.377170  | H          | -6.664748      | 3.169306  | 1.422358  |
| H          | 5.287429       | -2.915047 | 4.929483  | H          | -7.724613      | 2.328499  | 2.576863  |
| H          | 7.566262       | -2.223466 | 3.991796  | H          | -9.186427      | 1.596659  | 0.641642  |
| H          | 7.561759       | -1.360659 | 2.434723  | H          | -8.382719      | 0.780145  | -0.722596 |
| H          | 7.113207       | -3.075716 | 2.496003  | H          | -8.082216      | 2.504000  | -0.420945 |
| <b>FV2</b> |                |           |           | <b>FV2</b> |                |           |           |
| E          | -5082.93997849 |           |           | E          | -5082.92243942 |           |           |
| O          | -5.075568      | 3.549339  | -1.415610 | C          | 4.053913       | 5.408813  | 0.355910  |
| C          | -4.747428      | 2.141158  | -1.379727 | C          | 5.261171       | 5.134410  | -0.545265 |
| C          | -5.645464      | 1.501495  | -0.309715 | O          | 4.932046       | 5.514245  | -1.878832 |
| C          | -5.372969      | 2.154401  | 1.049199  | C          | 5.672005       | 3.668215  | -0.464207 |
| C          | -5.544752      | 3.666551  | 0.959725  | O          | 6.867266       | 3.526383  | -1.211544 |
| C          | -4.743952      | 4.233378  | -0.221489 | C          | 5.841835       | 3.207954  | 0.991332  |
| H          | -3.702298      | 2.019254  | -1.073915 | O          | 5.963259       | 1.783108  | 0.924252  |
| H          | -6.699902      | 1.637980  | -0.584121 | C          | 4.611089       | 3.608474  | 1.822321  |
| H          | -4.328397      | 1.936649  | 1.318230  | O          | 4.368260       | 5.018415  | 1.677531  |
| H          | -6.606235      | 3.881824  | 0.771269  | C          | 4.724671       | 3.352517  | 3.312148  |
| H          | -5.011680      | 5.280386  | -0.395677 | O          | 3.429140       | 3.589719  | 3.873127  |
| C          | -4.880185      | 1.590246  | -2.810170 | C          | 6.997889       | 1.120259  | 1.617068  |
| O          | -5.359167      | 0.115354  | -0.126532 | C          | 7.830019       | 0.308193  | 0.612478  |
| O          | -6.253414      | 1.676277  | 2.054855  | O          | 8.318885       | 1.182430  | -0.403798 |
| O          | -5.114428      | 4.326129  | 2.147691  | C          | 7.002809       | -0.825074 | 0.016299  |
| O          | -3.374596      | 4.111601  | 0.071552  | O          | 7.873958       | -1.597297 | -0.794179 |
| H          | -5.551900      | 0.731212  | -2.834298 | C          | 6.366739       | -1.647895 | 1.134639  |
| O          | -3.637288      | 1.128854  | -3.338616 | O          | 5.516040       | -2.618675 | 0.514210  |
| H          | -5.308132      | 2.380594  | -3.440298 | C          | 5.566141       | -0.745233 | 2.079727  |
| H          | -6.229040      | 0.700896  | 2.030683  | O          | 6.468578       | 0.257397  | 2.606164  |
| H          | -5.518438      | 3.854928  | 2.891463  | C          | 4.921165       | -1.490785 | 3.256118  |
| H          | -2.995582      | 1.873192  | -3.352882 | O          | 5.681274       | -2.584535 | 3.755212  |
| O          | -0.696666      | 6.017979  | -1.580667 | C          | 5.774759       | -3.980555 | 0.746535  |
| C          | -1.569189      | 4.876377  | -1.414593 | C          | 5.719516       | -4.732863 | -0.584319 |
| C          | -2.506646      | 5.200305  | -0.241880 | O          | 6.687310       | -4.164582 | -1.464096 |
| C          | -1.686002      | 5.443789  | 1.028278  | C          | 4.317760       | -4.669017 | -1.175445 |
| C          | -0.636066      | 6.523174  | 0.789704  | O          | 4.320302       | -5.468517 | -2.346183 |
| C          | 0.171124       | 6.227369  | -0.482827 | C          | 3.284279       | -5.143759 | -0.154106 |
| H          | -0.971041      | 3.996866  | -1.151056 | O          | 2.007288       | -4.815661 | -0.711102 |
| H          | -3.094235      | 6.097056  | -0.479333 | C          | 3.453808       | -4.438976 | 1.205032  |
| H          | -1.168393      | 4.503217  | 1.273366  | O          | 4.829449       | -4.534063 | 1.653233  |
| H          | -1.156963      | 7.478490  | 0.632502  | C          | 2.571084       | -5.024356 | 2.294355  |
| H          | 0.784792       | 7.092826  | -0.751936 | O          | 2.783768       | -6.431089 | 2.367744  |
| C          | -2.238457      | 4.596263  | -2.771376 | C          | 0.964221       | -5.769984 | -0.678161 |
| O          | -2.501762      | 5.862558  | 2.110503  | C          | 0.562103       | -6.123004 | -2.119034 |
| O          | 0.275271       | 6.635118  | 1.879565  | O          | 1.713690       | -6.569899 | -2.834750 |



|   |           |           |           |   |           |           |           |
|---|-----------|-----------|-----------|---|-----------|-----------|-----------|
| O | 0.977798  | 5.099708  | -0.248188 | C | -0.076207 | -4.922157 | -2.805711 |
| H | -3.324454 | 4.578317  | -2.671531 | O | -0.513458 | -5.353577 | -4.087358 |
| O | -1.874799 | 3.326902  | -3.312156 | C | -1.217153 | -4.371177 | -1.949957 |
| H | -1.968455 | 5.409653  | -3.457250 | O | -1.716941 | -3.197479 | -2.597847 |
| H | -3.228098 | 5.216108  | 2.200119  | C | -0.700847 | -4.041041 | -0.544573 |
| H | -0.257895 | 6.669000  | 2.687757  | O | -0.153926 | -5.259358 | 0.018588  |
| H | -0.899739 | 3.294586  | -3.432502 | C | -1.756922 | -3.497036 | 0.417804  |
| O | 3.940867  | 4.202390  | -2.240477 | O | -3.005279 | -4.167091 | 0.336472  |
| C | 2.535259  | 4.149459  | -1.902630 | C | -2.969436 | -3.302668 | -3.232655 |
| C | 2.323687  | 5.112097  | -0.723295 | C | -2.919925 | -2.573903 | -4.578563 |
| C | 3.179988  | 4.661596  | 0.464082  | O | -1.863872 | -3.126611 | -5.359873 |
| C | 4.644295  | 4.559340  | 0.052000  | C | -2.741545 | -1.072893 | -4.374724 |
| C | 4.785155  | 3.707836  | -1.218018 | O | -2.844555 | -0.464591 | -5.650165 |
| H | 2.278544  | 3.135795  | -1.575003 | C | -3.767210 | -0.512440 | -3.377108 |
| H | 2.609401  | 6.128619  | -1.024874 | O | -3.333364 | 0.820821  | -3.085698 |
| H | 2.832087  | 3.661073  | 0.761146  | C | -3.776732 | -1.365286 | -2.098402 |
| H | 5.008552  | 5.569161  | -0.184554 | O | -4.000020 | -2.743463 | -2.444648 |
| H | 5.803060  | 3.778479  | -1.614273 | C | -4.841564 | -1.008661 | -1.079032 |
| C | 1.735263  | 4.441097  | -3.184121 | O | -4.574778 | -1.783892 | 0.089291  |
| O | 3.094531  | 5.561903  | 1.557591  | C | -4.230160 | 1.903572  | -3.202975 |
| O | 5.450375  | 3.974990  | 1.071762  | C | -3.633402 | 2.945735  | -4.157450 |
| O | 4.467090  | 2.377657  | -0.893393 | O | -3.395719 | 2.335256  | -5.426101 |
| H | 1.051687  | 5.277654  | -3.033713 | C | -2.350483 | 3.529471  | -3.578618 |
| O | 0.922230  | 3.339311  | -3.586276 | O | -1.922377 | 4.556970  | -4.458482 |
| H | 2.447337  | 4.714658  | -3.973374 | C | -2.584601 | 4.044831  | -2.160191 |
| H | 2.147807  | 5.716760  | 1.740572  | O | -1.286730 | 4.347281  | -1.635417 |
| H | 5.241515  | 4.439446  | 1.895665  | C | -3.281085 | 2.987807  | -1.285046 |
| H | 1.491938  | 2.553343  | -3.739676 | O | -4.470393 | 2.504173  | -1.946491 |
| O | 5.377128  | -0.587382 | -2.869768 | C | -3.689692 | 3.515382  | 0.079366  |
| C | 4.503689  | 0.493060  | -2.468199 | O | -4.462333 | 4.702797  | -0.081885 |
| C | 5.270030  | 1.326987  | -1.430594 | C | -1.088213 | 5.556142  | -0.932011 |
| C | 5.646079  | 0.450448  | 0.232036  | C | -0.032968 | 6.396911  | -1.668541 |
| C | 6.414273  | -0.784852 | -0.688144 | O | -0.441106 | 6.580843  | -3.024015 |
| C | 5.661131  | -1.495854 | -1.821779 | C | 1.335549  | 5.730610  | -1.593217 |
| H | 3.609838  | 0.078674  | -1.988882 | O | 2.268292  | 6.618952  | -2.192943 |
| H | 6.178939  | 1.739196  | -1.888621 | C | 1.683490  | 5.407063  | -0.139843 |
| H | 4.710501  | 0.120707  | 0.244284  | O | 2.934775  | 4.712352  | -0.138092 |
| H | 7.385118  | -0.460302 | -1.088825 | C | 0.575266  | 4.547813  | 0.479358  |
| H | 6.287086  | -2.276087 | -2.266160 | O | -0.658878 | 5.300735  | 0.390578  |
| C | 4.050656  | 1.229505  | -3.740668 | C | 0.798536  | 4.163223  | 1.941908  |
| O | 6.458205  | 1.151577  | 0.698628  | O | 1.316249  | 5.217983  | 2.738573  |
| O | 6.607657  | -1.717842 | 0.371692  | H | 3.851547  | 6.482766  | 0.404013  |
| O | 4.481265  | -2.043316 | -1.290138 | H | 6.092489  | 5.749131  | -0.172113 |
| H | 4.275317  | 2.294854  | -3.672197 | H | 5.633640  | 5.175507  | -2.454386 |
| O | 2.642539  | 1.140071  | -3.954577 | H | 4.862668  | 3.062798  | -0.900459 |
| H | 4.606809  | 0.813648  | -4.590686 | H | 7.223383  | 2.628790  | -1.052371 |
| H | 6.002673  | 1.986969  | 0.919534  | H | 6.752922  | 3.652973  | 1.412133  |
| H | 6.935892  | -1.214768 | 1.131759  | H | 3.751007  | 3.045920  | 1.439810  |
| H | 2.384895  | 0.195245  | -4.037003 | H | 5.472854  | 4.029948  | 3.744670  |
| O | 2.490183  | -4.711125 | -2.856059 | H | 5.043986  | 2.317517  | 3.483298  |
| C | 2.844162  | -3.333105 | -2.595395 | H | 3.500215  | 3.565822  | 4.836413  |
| C | 4.085139  | -3.354613 | -1.690296 | H | 7.630793  | 1.837212  | 2.149466  |
| C | 3.764291  | -4.090589 | -0.386018 | H | 8.674979  | -0.130778 | 1.161184  |
| C | 3.210162  | -5.480896 | -0.673385 | H | 8.678853  | 0.611065  | -1.100077 |
| C | 2.070776  | -5.411080 | -1.700835 | H | 6.194139  | -0.387291 | -0.588090 |
| H | 2.026881  | -2.844286 | -2.053312 | H | 7.369166  | -2.355240 | -1.149859 |
| H | 4.911274  | -3.860140 | -2.207868 | H | 7.148067  | -2.150168 | 1.715563  |
| H | 2.988935  | -3.510267 | 0.137835  | H | 4.770404  | -0.237861 | 1.521426  |
| H | 4.013871  | -6.087134 | -1.114938 | H | 3.921360  | -1.817986 | 2.949109  |
| H | 1.806109  | -6.416701 | -2.042500 | H | 4.792463  | -0.771051 | 4.071290  |
| C | 2.994506  | -2.622397 | -3.951229 | H | 5.399095  | -3.371685 | 3.259214  |
| O | 4.913891  | -4.240574 | 0.431286  | H | 6.750728  | -4.117514 | 1.221941  |
| O | 2.710865  | -6.111122 | 0.503568  | H | 5.968004  | -5.783990 | -0.382284 |
| O | 0.964506  | -4.783357 | -1.099514 | H | 6.493256  | -4.506852 | -2.349844 |
| H | 3.961033  | -2.121692 | -4.020324 | H | 4.092465  | -3.619545 | -1.418651 |
| O | 2.013342  | -1.605509 | -4.150942 | H | 3.391705  | -5.653169 | -2.594737 |
| H | 2.942370  | -3.382411 | -4.741505 | H | 3.378674  | -6.225953 | -0.017956 |
| H | 5.314539  | -3.356966 | 0.541523  | H | 3.189902  | -3.381888 | 1.080898  |
| H | 3.383893  | -5.994558 | 1.190717  | H | 1.528846  | -4.789599 | 2.044678  |
| H | 1.117485  | -2.007187 | -4.105166 | H | 2.814977  | -4.531450 | 3.246183  |
| O | -2.488896 | -5.108710 | -2.332452 | H | 2.135153  | -6.793496 | 2.985298  |
| C | -1.199138 | -4.460058 | -2.241057 | H | 1.278990  | -6.660968 | -0.127000 |

|   |           |           |           |   |           |           |           |
|---|-----------|-----------|-----------|---|-----------|-----------|-----------|
| C | -0.333982 | -5.332658 | -1.317779 | H | -0.179251 | -6.932956 | -2.068992 |
| C | -0.984739 | -5.399921 | 0.067000  | H | 1.449763  | -6.591075 | -3.768497 |
| C | -2.414536 | -5.918570 | -0.044116 | H | 0.684101  | -4.133835 | -2.905645 |
| C | -3.195431 | -5.127985 | -1.106236 | H | -0.803644 | -4.566533 | -4.587820 |
| H | -1.320422 | -3.474745 | -1.777156 | H | -2.015109 | -5.114814 | -1.851852 |
| H | -0.251064 | -6.342137 | -1.741857 | H | 0.102745  | -3.296736 | -0.609693 |
| H | -1.019564 | -4.374029 | 0.463200  | H | -1.879758 | -2.428419 | 0.216588  |
| H | -2.376937 | -6.966990 | -0.372140 | H | -1.345925 | -3.590653 | 1.433125  |
| H | -4.148915 | -5.620321 | -1.321802 | H | -3.663226 | -3.490379 | 0.090696  |
| C | -0.681589 | -4.235356 | -3.672589 | H | -3.242110 | -4.351942 | -3.378539 |
| O | -0.272438 | -6.250373 | 0.952909  | H | -3.885608 | -2.743594 | -5.075653 |
| O | -3.120117 | -5.816665 | 1.190337  | H | -1.738712 | -2.544703 | -6.124055 |
| O | -3.404168 | -3.826404 | -0.621006 | H | -1.744612 | -0.903904 | -3.939401 |
| H | 0.296686  | -4.697210 | -3.811100 | H | -2.841152 | 0.506701  | -5.528752 |
| O | -0.507323 | -2.852547 | -3.980475 | H | -4.762610 | -0.500577 | -3.839869 |
| H | -1.388408 | -4.707848 | -4.366722 | H | -2.796573 | -1.262424 | -1.618325 |
| H | 0.676104  | -6.024417 | 0.885925  | H | -5.835084 | -1.237275 | -1.490370 |
| H | -2.553881 | -6.201788 | 1.875225  | H | -4.792723 | 0.065811  | -0.866903 |
| H | -1.367343 | -2.387432 | -3.882639 | H | -5.141037 | -1.504249 | 0.841029  |
| O | -5.898172 | -1.401811 | -1.810745 | H | -5.205165 | 1.561684  | -3.564631 |
| C | -4.590915 | -2.019243 | -1.772984 | H | -4.369555 | 3.753797  | -4.267690 |
| C | -4.680256 | -3.214600 | -0.812994 | H | -2.861458 | 2.963998  | -5.935538 |
| C | -5.109063 | -2.732201 | 0.574479  | H | -1.600494 | 2.725766  | -3.524109 |
| C | -6.403514 | -1.933342 | 0.497567  | H | -1.258525 | 5.102696  | -3.990585 |
| C | -6.290614 | -0.838143 | -0.572347 | H | -3.201475 | 4.948628  | -2.199602 |
| H | -3.864023 | -1.305879 | -1.369018 | H | -2.589268 | 2.150926  | -1.129054 |
| H | -5.401344 | -3.948121 | -1.197263 | H | -2.775280 | 3.712154  | 0.652941  |
| H | -4.316766 | -2.063394 | 0.939868  | H | -4.260704 | 2.734362  | 0.599645  |
| H | -7.216712 | -2.608934 | 0.197575  | H | -4.632869 | 5.060438  | 0.799333  |
| H | -7.265829 | -0.375061 | -0.753013 | H | -2.031107 | 6.102661  | -0.837842 |
| C | -4.176275 | -2.338106 | -3.219641 | H | 0.026810  | 7.371853  | -1.164252 |
| O | -5.312140 | -3.807431 | 1.477263  | H | 0.331674  | 6.944773  | -3.484446 |
| O | -6.717727 | -1.312700 | 1.743556  | H | 1.293175  | 4.783701  | -2.151386 |
| H | -3.920069 | -3.393644 | -3.324022 | H | 3.129621  | 6.161553  | -2.247881 |
| O | -3.019198 | -1.611994 | -3.632191 | H | 1.765378  | 6.328140  | 0.446771  |
| H | -5.031395 | -2.124990 | -3.874121 | H | 0.459656  | 3.619414  | -0.094067 |
| H | -4.506459 | -4.359732 | 1.471013  | H | 1.464919  | 3.295765  | 1.968918  |
| H | -6.670631 | -2.004920 | 2.419822  | H | -0.173627 | 3.837740  | 2.339017  |
| H | -3.198511 | -0.648673 | -3.557971 | H | 2.176146  | 4.909124  | 3.076708  |
| C | 1.424076  | -4.676500 | 5.204150  | C | -4.847104 | 3.294474  | 4.605034  |
| C | 1.957809  | -3.858161 | 6.199788  | C | -6.182388 | 2.998782  | 4.879267  |
| C | 1.992768  | -2.477778 | 6.008175  | C | -6.728291 | 1.804718  | 4.414285  |
| C | 1.507925  | -1.882791 | 4.833339  | C | -5.975626 | 0.885197  | 3.664843  |
| C | 0.945649  | -2.710636 | 3.842517  | C | -4.620749 | 1.173185  | 3.413962  |
| C | 0.913852  | -4.097813 | 4.042483  | C | -4.080097 | 2.377210  | 3.889670  |
| C | 0.276452  | -2.115511 | 2.619139  | C | -3.705187 | 0.172669  | 2.735094  |
| C | -0.839617 | -1.189953 | 3.041297  | C | -3.712475 | -1.143654 | 3.477165  |
| C | -2.185354 | -1.522476 | 2.884187  | C | -2.598936 | -1.571795 | 4.202843  |
| C | -3.197552 | -0.635538 | 3.264437  | C | -2.611911 | -2.776673 | 4.909960  |
| C | -2.853823 | 0.597887  | 3.816336  | C | -3.763415 | -3.560202 | 4.899388  |
| C | -1.510984 | 0.934006  | 4.007962  | C | -4.890593 | -3.143456 | 4.186662  |
| C | -0.491210 | 0.045609  | 3.631684  | C | -4.878686 | -1.939232 | 3.469014  |
| C | 1.725652  | -0.374237 | 4.706637  | C | -6.754632 | -0.327124 | 3.151128  |
| N | 0.889782  | 0.364347  | 3.729871  | N | -5.984523 | -1.508360 | 2.654595  |
| C | 3.210458  | -0.120691 | 4.361001  | C | -7.712329 | 0.121555  | 2.026887  |
| C | 1.218281  | 1.793086  | 3.748148  | C | -6.941783 | -2.583429 | 2.312776  |
| C | 2.688826  | 2.006979  | 3.405834  | C | -7.913697 | -2.128689 | 1.230196  |
| N | 3.530607  | 1.303029  | 4.367610  | N | -8.642018 | -0.942129 | 1.663294  |
| C | 4.951025  | 1.537436  | 4.133718  | C | -9.607116 | -0.500446 | 0.663301  |
| H | 1.389904  | -5.753984 | 5.336129  | H | -4.401181 | 4.218754  | 4.960001  |
| H | 2.341589  | -4.287443 | 7.120443  | H | -6.794502 | 3.686660  | 5.454585  |
| H | 2.409263  | -1.843307 | 6.787014  | H | -7.767571 | 1.576778  | 4.637932  |
| H | 0.474795  | -4.728591 | 3.272773  | H | -3.030641 | 2.586940  | 3.700125  |
| H | -0.112498 | -2.918076 | 1.987698  | H | -2.688758 | 0.574275  | 2.708862  |
| H | 1.003972  | -1.544880 | 2.028830  | H | -4.007741 | 0.009897  | 1.695810  |
| H | -2.443491 | -2.480946 | 2.440764  | H | -1.705428 | -0.953048 | 4.204691  |
| H | -4.239837 | -0.899336 | 3.115260  | H | -1.732152 | -3.095671 | 5.460408  |
| H | -3.630643 | 1.300490  | 4.104435  | H | -3.794945 | -4.498110 | 5.445884  |
| H | -1.261821 | 1.890527  | 4.453810  | H | -5.775768 | -3.767539 | 4.196852  |
| H | 1.556684  | 0.059676  | 5.708851  | H | -7.387106 | -0.672728 | 3.985927  |
| H | 3.424177  | -0.590873 | 3.380444  | H | -7.105271 | 0.466223  | 1.166141  |
| H | 3.834609  | -0.621246 | 5.107385  | H | -8.290977 | 0.980447  | 2.377617  |

|   |          |          |          |   |            |           |           |
|---|----------|----------|----------|---|------------|-----------|-----------|
| H | 1.016099 | 2.250948 | 4.732158 | H | -7.519859  | -2.896102 | 3.196013  |
| H | 0.595662 | 2.300028 | 3.006321 | H | -6.374141  | -3.444836 | 1.952894  |
| H | 2.916234 | 3.078514 | 3.440050 | H | -8.628304  | -2.936759 | 1.038641  |
| H | 2.874196 | 1.659946 | 2.369943 | H | -7.362352  | -1.953865 | 0.286709  |
| H | 5.298378 | 1.180681 | 3.147051 | H | -9.136411  | -0.208536 | -0.293730 |
| H | 5.539982 | 1.029047 | 4.903974 | H | -10.165680 | 0.360625  | 1.043038  |
| H | 5.160775 | 2.610115 | 4.198267 | H | -10.318221 | -1.306749 | 0.458167  |

| Complexes 1:2 WATER             |                |           |           |                               |                |           |           |
|---------------------------------|----------------|-----------|-----------|-------------------------------|----------------|-----------|-----------|
| [β-CD-CCCW]-[MIA S]-[β-CD-CCCW] |                |           |           | [β-CD-EXP]-[MIA S]-[β-CD-EXP] |                |           |           |
| CAPS A                          |                |           |           | CAPS A                        |                |           |           |
| E                               | -9358.46539934 |           |           | E                             | -9358.41721784 |           |           |
| ZPE                             | -9355.671029   |           |           | ZPE                           | -9355.629055   |           |           |
| H                               | -9355.510461   |           |           | H                             | -9355.464636   |           |           |
| G                               | -9355.853740   |           |           | G                             | -9355.823550   |           |           |
| S                               | 722.491        |           |           | S                             | 755.398        |           |           |
| Atom                            | x [Å]          | y [Å]     | z [Å]     | Atom                          | x [Å]          | y [Å]     | z [Å]     |
| O                               | -7.680125      | 1.411234  | 1.317935  | C                             | 1.962593       | -4.372807 | 4.625719  |
| C                               | -6.825226      | 0.550646  | 2.100288  | C                             | 3.228475       | -3.596040 | 4.205367  |
| C                               | -5.954233      | 1.385639  | 3.052787  | O                             | 3.113100       | -2.266573 | 4.694482  |
| C                               | -5.258062      | 2.528606  | 2.307487  | C                             | 3.416411       | -3.630110 | 2.690233  |
| C                               | -6.204514      | 3.316429  | 1.410447  | O                             | 4.690732       | -3.082492 | 2.371272  |
| C                               | -6.988088      | 2.339266  | 0.511528  | C                             | 3.285940       | -5.052202 | 2.142308  |
| H                               | -6.159864      | 0.000514  | 1.427397  | O                             | 3.358697       | -4.961425 | 0.708964  |
| H                               | -6.558237      | 1.790182  | 3.875651  | C                             | 1.955893       | -5.659670 | 2.595681  |
| H                               | -4.513132      | 2.071510  | 1.651246  | O                             | 1.958092       | -5.661720 | 4.042637  |
| H                               | -6.934133      | 3.859816  | 2.026774  | C                             | 1.719984       | -7.092665 | 2.100860  |
| H                               | -7.751671      | 2.878005  | -0.058425 | O                             | 2.899628       | -7.880936 | 1.987222  |
| C                               | -7.741184      | -0.441356 | 2.805169  | C                             | 4.339774       | -5.698428 | 0.012975  |
| O                               | -4.880507      | 0.580777  | 3.573473  | C                             | 5.070382       | -4.764933 | -0.964072 |
| O                               | -4.624287      | 3.413895  | 3.231650  | O                             | 5.632312       | -3.733211 | -0.167003 |
| O                               | -5.510173      | 4.222226  | 0.558583  | C                             | 4.099822       | -4.243542 | -2.027265 |
| O                               | -6.084847      | 1.685532  | -0.356554 | O                             | 4.763344       | -3.600358 | -3.115284 |
| H                               | -7.192526      | -0.918932 | 3.621825  | C                             | 3.269144       | -5.366225 | -2.657697 |
| O                               | -8.195146      | -1.477823 | 1.949146  | O                             | 2.153253       | -4.719661 | -3.296066 |
| H                               | -8.581625      | 0.121843  | 3.241755  | C                             | 2.734535       | -6.399096 | -1.646428 |
| H                               | -4.125394      | 2.858763  | 3.872287  | O                             | 3.755005       | -6.781285 | -0.691827 |
| H                               | -4.823133      | 4.710940  | 1.052230  | C                             | 2.304672       | -7.699083 | -2.320454 |
| H                               | -8.331092      | -1.114599 | 1.053822  | O                             | 3.381088       | -8.325180 | -3.005514 |
| O                               | -6.647076      | 0.264218  | -3.716822 | C                             | 1.889816       | -4.932868 | -4.670535 |
| C                               | -6.670264      | 0.291483  | -2.274223 | C                             | 1.785969       | -3.562740 | -5.371330 |
| C                               | -6.290156      | 1.696364  | -1.773637 | O                             | 2.936189       | -2.764895 | -5.125758 |
| C                               | -4.977032      | 2.183644  | -2.393484 | C                             | 0.499741       | -2.829859 | -4.985060 |
| C                               | -5.010481      | 2.035962  | -3.912237 | O                             | 0.364138       | -1.690169 | -5.830728 |
| C                               | -5.417253      | 0.608507  | -4.319961 | C                             | -0.715455      | -3.743343 | -5.158483 |
| H                               | -5.945629      | -0.431411 | -1.880695 | O                             | -1.850304      | -3.029695 | -4.643651 |
| H                               | -7.087185      | 2.405124  | -2.035533 | O                             | -0.521377      | -5.076987 | -4.423057 |
| H                               | -4.155471      | 1.570065  | -1.999639 | C                             | 0.715132       | -5.688668 | -4.860568 |
| H                               | -5.780174      | 2.713864  | -4.308429 | C                             | -1.601695      | -6.104174 | -4.745958 |
| H                               | -5.604760      | 0.572064  | -5.397538 | O                             | -1.647807      | -6.405523 | -6.135332 |
| C                               | -8.090922      | -0.151175 | -1.866696 | C                             | -3.000204      | -2.893940 | -5.457145 |
| O                               | -4.769523      | 3.557497  | -2.075157 | C                             | -3.379209      | -1.398650 | -5.585976 |
| O                               | -3.756436      | 2.311625  | -4.510146 | O                             | -2.216412      | -0.684716 | -5.984927 |
| O                               | -4.386326      | -0.298270 | -3.973896 | C                             | -4.000211      | -0.853710 | -4.300223 |
| H                               | -8.678020      | 0.697305  | -1.508110 | O                             | -4.528365      | 0.444516  | -4.574150 |
| O                               | -8.108667      | -1.105890 | -0.810046 | C                             | -5.104316      | -1.796134 | -3.813437 |
| H                               | -8.584448      | -0.549283 | -2.760504 | O                             | -5.606661      | -1.258516 | -2.583560 |
| H                               | -4.918717      | 3.672157  | -1.109834 | C                             | -4.533077      | -3.208538 | -3.637278 |
| H                               | -3.434438      | 3.206861  | -4.274956 | O                             | -4.085202      | -3.639692 | -4.942664 |
| H                               | -7.786802      | -1.952683 | -1.147222 | C                             | -5.519520      | -4.244847 | -3.087043 |
| O                               | -3.344413      | -3.531233 | -5.397788 | O                             | -6.861778      | -4.110064 | -3.547395 |
| C                               | -3.937458      | -2.648243 | -4.421270 | C                             | -6.981993      | -0.979101 | -2.477054 |
| C                               | -3.892971      | -1.211254 | -4.968354 | C                             | -7.164822      | 0.385523  | -1.799597 |
| C                               | -2.433727      | -0.828140 | -5.273590 | O                             | -6.462420      | 1.331942  | -2.598938 |
| C                               | -1.746595      | -1.869261 | -6.157882 | C                             | -6.648338      | 0.307209  | -0.367519 |
| C                               | -1.974938      | -3.306183 | -5.645489 | O                             | -6.889310      | 1.552875  | 0.281853  |
| H                               | -3.356457      | -2.685121 | -3.491638 | C                             | -7.256170      | -0.860061 | 0.417432  |
| H                               | -4.497379      | -1.140709 | -5.881986 | O                             | -6.453434      | -0.961356 | 1.605164  |
| H                               | -1.904132      | -0.789262 | -4.316808 | C                             | -7.147553      | -2.171822 | -0.380393 |
| H                               | -2.203641      | -1.811766 | -7.156720 | O                             | -7.651861      | -1.985486 | -1.728324 |
| H                               | -1.697337      | -4.018336 | -6.428894 | C                             | -7.937675      | -3.330457 | 0.215158  |
| C                               | -5.334572      | -3.191771 | -4.137171 | O                             | -7.597823      | -4.579519 | -0.376052 |
| O                               | -2.353670      | 0.433633  | -5.933075 | C                             | -7.062004      | -0.979692 | 2.875378  |
| O                               | -0.342023      | -1.676701 | -6.252486 | C                             | -6.418872      | 0.090150  | 3.779991  |
| O                               | -1.199870      | -3.534622 | -4.486408 | O                             | -6.462861      | 1.351456  | 3.113322  |
| H                               | -5.975325      | -2.376326 | -3.793012 | C                             | -4.997884      | -0.279807 | 4.205774  |
| O                               | -5.360543      | -4.180125 | -3.117060 | O                             | -4.648862      | 0.597669  | 5.269756  |
| H                               | -5.749941      | -3.570942 | -5.083328 | C                             | -4.867451      | -1.744280 | 4.637202  |
| H                               | -2.823751      | 1.092312  | -5.370551 | O                             | -3.460237      | -2.052142 | 4.658780  |

|   |           |           |           |   |           |           |           |
|---|-----------|-----------|-----------|---|-----------|-----------|-----------|
| H | -0.108830 | -0.729240 | -6.314878 | C | -5.588239 | -2.707032 | 3.684095  |
| H | -4.645904 | -4.830638 | -3.240082 | O | -6.944300 | -2.255458 | 3.475939  |
| O | 0.064449  | -6.812789 | -3.361897 | C | -5.718702 | -4.117411 | 4.251128  |
| C | -0.890391 | -5.732567 | -3.439973 | O | -6.478533 | -4.134983 | 5.453246  |
| C | -0.357197 | -4.693459 | -4.437412 | C | -2.856435 | -2.414298 | 5.883161  |
| C | 1.032971  | -4.199030 | -4.015348 | C | -1.624595 | -1.518946 | 6.147184  |
| C | 1.980438  | -5.377899 | -3.783377 | O | -1.994312 | -0.146396 | 6.139504  |
| C | 1.329161  | -6.428293 | -2.865092 | C | -0.481981 | -1.861123 | 5.189211  |
| H | -0.983955 | -5.252214 | -2.460549 | O | 0.673103  | -1.108808 | 5.555527  |
| H | -0.285353 | -5.148322 | -5.434194 | C | -0.186532 | -3.362843 | 5.250098  |
| H | 0.928399  | -3.637490 | -3.076146 | O | 0.813670  | -3.630997 | 4.257823  |
| H | 2.163384  | -5.859530 | -4.754966 | C | -1.457246 | -4.186746 | 4.986508  |
| H | 1.933837  | -7.340672 | -2.853525 | O | -2.496665 | -3.781004 | 5.903050  |
| C | -2.249290 | -6.354895 | -3.799584 | C | -1.271063 | -5.678427 | 5.247614  |
| O | 1.578169  | -3.366347 | -5.036092 | O | -0.894983 | -5.934582 | 6.595550  |
| C | 3.208929  | -5.008205 | -3.177575 | H | 1.971186  | -4.541274 | 5.706480  |
| O | 1.223884  | -5.885388 | -1.570237 | H | 4.086588  | -4.101132 | 4.670959  |
| H | -2.686155 | -5.858285 | -4.667593 | H | 3.896206  | -1.741839 | 4.426464  |
| O | -3.218142 | -6.220889 | -2.762515 | H | 2.615490  | -3.021129 | 2.251086  |
| H | -2.080283 | -7.408732 | -4.056148 | H | 4.894893  | -3.288252 | 1.430525  |
| H | 0.878412  | -2.733157 | -5.314726 | H | 4.103368  | -5.677205 | 2.517529  |
| H | 3.600695  | -4.217210 | -3.601159 | H | 1.123082  | -5.038022 | 2.246444  |
| H | -2.864495 | -6.604431 | -1.937108 | H | 1.189770  | -7.042053 | 1.143897  |
| O | 0.919917  | -7.539346 | 1.688912  | H | 1.053414  | -7.583981 | 2.817511  |
| C | 0.441750  | -6.936642 | 0.466807  | H | 3.206938  | -7.795030 | 1.070305  |
| C | 1.649773  | -6.648723 | -0.435533 | H | 5.054052  | -6.147951 | 0.708780  |
| C | 2.672515  | -5.766612 | 0.294717  | H | 5.861113  | -5.348312 | -1.455638 |
| C | 3.012522  | -6.301607 | 1.684131  | H | 5.976502  | -2.974812 | -0.685423 |
| C | 1.724671  | -6.662023 | 2.452048  | H | 3.412019  | -3.550745 | -1.536797 |
| H | -0.030504 | -5.982130 | 0.709843  | H | 5.119391  | -2.714008 | -2.884602 |
| H | 2.119498  | -7.587597 | -0.756595 | H | 3.884540  | -5.886003 | -3.400745 |
| H | 2.205246  | -4.785846 | 0.415234  | H | 1.887839  | -5.963598 | -1.108674 |
| H | 3.599125  | -7.224804 | 1.574206  | H | 1.534689  | -7.478396 | -3.064354 |
| H | 1.970859  | -7.201572 | 3.371710  | H | 1.870101  | -8.365282 | -1.562233 |
| C | -0.637821 | -7.845902 | -0.145860 | H | 4.077046  | -8.471568 | -2.347935 |
| O | 3.872023  | -5.640626 | -0.470840 | H | 2.694467  | -5.522944 | -5.120081 |
| O | 3.718920  | -5.359642 | 2.484672  | H | 1.741643  | -3.754836 | -6.450721 |
| O | 1.038489  | -5.464162 | 2.748908  | H | 3.429562  | -3.106160 | -4.347228 |
| H | -0.406473 | -8.062518 | -1.190270 | H | 0.562192  | -2.524435 | -3.930428 |
| O | -1.932421 | -7.242041 | -0.157113 | H | -0.558827 | -1.356037 | -5.743712 |
| H | -0.644836 | -8.793293 | 0.408851  | H | -0.856450 | -3.952218 | -6.225389 |
| H | 3.605903  | -5.348319 | -1.371417 | H | -0.493351 | -4.900013 | -3.341597 |
| H | 4.423533  | -4.915027 | 1.974893  | H | -2.578989 | -5.698977 | -4.475220 |
| H | -2.200187 | -7.044447 | 0.764993  | H | -1.418729 | -7.006687 | -4.145915 |
| O | -1.540048 | -4.885284 | 5.313286  | H | -0.754435 | -6.690219 | -6.379102 |
| C | -1.043621 | -5.252195 | 4.008487  | H | -2.807598 | -3.308973 | -6.450981 |
| C | 0.489867  | -5.248023 | 4.053584  | H | -4.144357 | -1.333544 | -6.373076 |
| C | 1.010271  | -3.875139 | 4.495265  | H | -2.317876 | 0.740665  | -5.825041 |
| C | 0.357502  | -3.448331 | 5.807908  | H | -3.227324 | -0.292091 | -3.521454 |
| C | -1.177676 | -3.585971 | 5.721745  | H | -5.073532 | 0.715025  | -3.804452 |
| H | -1.375458 | -4.502087 | 3.286225  | H | -5.908862 | -1.841247 | -4.556551 |
| H | 0.850321  | -6.017506 | 4.749015  | H | -3.670303 | -3.181903 | -2.959748 |
| H | 0.741796  | -3.141476 | 3.721967  | H | -5.485606 | -4.218633 | -1.992825 |
| H | 0.698258  | -4.134180 | 6.597283  | H | -5.167966 | -5.232356 | -3.400957 |
| H | -1.610631 | -3.460766 | 6.719281  | H | -7.276373 | -3.415680 | -3.006008 |
| C | -1.673350 | -6.602662 | 3.628856  | H | -7.458385 | -0.979594 | -3.462150 |
| O | 2.427306  | -3.925986 | 4.658756  | H | -8.238986 | 0.616403  | -1.791355 |
| O | 0.639669  | -2.106502 | 6.171013  | H | -6.353217 | 2.178728  | -2.131117 |
| O | -1.679364 | -2.593530 | 4.845737  | H | -5.576207 | 0.102059  | -0.420358 |
| H | -0.909938 | -7.299295 | 3.278724  | H | -6.684161 | 1.437261  | 1.237579  |
| O | -2.623473 | -6.497183 | 2.568236  | H | -8.300814 | -0.644271 | 0.676654  |
| H | -2.135691 | -7.024336 | 4.531447  | H | -6.088787 | -2.449024 | -0.428121 |
| H | 2.798780  | -4.350939 | 3.854084  | H | -9.012482 | -3.118586 | 0.123716  |
| H | 1.568803  | -1.863440 | 5.977704  | H | -7.694415 | -3.410611 | 1.277501  |
| H | -3.238182 | -5.766374 | 2.797820  | H | -7.904432 | -4.576716 | -1.294063 |
| O | -5.098459 | -1.239408 | 5.004879  | H | -8.137374 | -0.795429 | 2.786783  |
| C | -4.049329 | -2.015446 | 4.384756  | H | -7.032577 | 0.139344  | 4.690283  |
| C | -2.807886 | -1.823486 | 5.266585  | H | -5.618511 | 1.825022  | 3.259505  |
| C | -2.393609 | -0.345494 | 5.217693  | H | -4.328025 | -0.130096 | 3.347893  |
| C | -3.566571 | 0.563910  | 5.604365  | H | -3.768152 | 0.332242  | 5.601567  |
| C | -4.893288 | 0.157677  | 4.917958  | H | -5.295473 | -1.863876 | 5.639029  |
| H | -3.858706 | -1.614872 | 3.382275  | H | -5.059174 | -2.742260 | 2.724390  |

|   |           |           |           |   |           |           |           |
|---|-----------|-----------|-----------|---|-----------|-----------|-----------|
| H | -3.078477 | -2.091428 | 6.296311  | H | -4.725488 | -4.501959 | 4.494890  |
| H | -2.079127 | -0.114465 | 4.189236  | H | -6.165793 | -4.767010 | 3.485558  |
| H | -3.720320 | 0.436281  | 6.685924  | H | -7.324966 | -3.713561 | 5.242186  |
| H | -5.733143 | 0.613556  | 5.451213  | H | -3.570709 | -2.294735 | 6.703592  |
| O | -4.565088 | -3.451254 | 4.215496  | H | -1.285702 | -1.748380 | 7.165009  |
| O | -1.323528 | -0.096600 | 6.125470  | H | -1.753475 | 0.301082  | 5.298371  |
| O | -3.337545 | 1.932354  | 5.300613  | H | -0.783651 | -1.612974 | 4.162061  |
| H | -4.403949 | -4.038917 | 5.123941  | H | 1.453707  | -1.477374 | 5.085131  |
| O | -3.903437 | -4.124335 | 3.156204  | H | 0.195873  | -3.614206 | 6.246285  |
| H | -5.647942 | -3.388948 | 4.038673  | H | -1.782650 | -4.032394 | 3.950020  |
| H | -0.648046 | -0.802779 | 5.999415  | H | -0.469609 | -6.063860 | 4.614464  |
| H | -2.427007 | 2.205144  | 5.533873  | H | -2.204114 | -6.197593 | 4.986727  |
| H | -3.990731 | -3.612493 | 2.301161  | H | -1.571815 | -5.513980 | 7.146741  |
| O | 2.995790  | 4.301883  | 5.513783  | C | 7.497208  | 1.040621  | 1.867578  |
| C | 2.340706  | 4.733019  | 4.300520  | C | 6.876667  | 0.030883  | 2.850594  |
| C | 0.839338  | 4.799078  | 4.615784  | O | 6.668575  | -1.187553 | 2.147158  |
| C | 0.325701  | 3.408344  | 5.016051  | C | 5.588490  | 0.590879  | 3.445553  |
| C | 1.150535  | 2.848577  | 6.174575  | O | 5.130806  | -0.297527 | 4.469655  |
| C | 2.660043  | 2.983354  | 5.888631  | C | 5.771541  | 2.007303  | 4.011442  |
| H | 2.504003  | 3.988592  | 3.513161  | O | 4.426434  | 2.492506  | 4.174994  |
| H | 0.673501  | 5.501259  | 5.443371  | C | 6.561044  | 2.924929  | 3.053592  |
| H | 0.431834  | 2.744096  | 4.146008  | O | 7.727957  | 2.262958  | 2.528447  |
| H | 0.932374  | 3.460260  | 7.062165  | C | 7.151074  | 4.186342  | 3.707975  |
| H | 3.227010  | 2.781464  | 6.802896  | O | 6.286530  | 4.867987  | 4.598525  |
| C | 3.008438  | 6.043226  | 3.849217  | C | 4.044043  | 3.164521  | 5.356593  |
| O | 0.061846  | 5.183211  | 3.482381  | C | 3.010951  | 2.340076  | 6.126000  |
| O | -1.042685 | 3.489310  | 5.414756  | O | 3.574915  | 1.055619  | 6.393353  |
| O | 0.903931  | 1.478505  | 6.451726  | C | 1.685507  | 2.218558  | 5.368323  |
| O | 3.008576  | 2.065416  | 4.877561  | O | 0.735076  | 1.573296  | 6.202206  |
| H | 2.269198  | 6.835780  | 3.725885  | C | 1.180033  | 3.609624  | 4.977455  |
| O | 3.661470  | 5.918547  | 2.586604  | O | 0.022317  | 3.482089  | 4.127810  |
| H | 3.715199  | 6.349569  | 4.630907  | C | 2.273926  | 4.394874  | 4.231675  |
| H | -1.510903 | 4.042807  | 4.751665  | O | 3.483378  | 4.421278  | 5.026760  |
| H | -0.036202 | 1.241648  | 6.315632  | C | 1.938924  | 5.865238  | 4.005329  |
| H | 4.346164  | 5.216617  | 2.642027  | O | 1.689955  | 6.556475  | 5.220663  |
| O | 6.407265  | 0.808217  | 4.271761  | C | -1.229952 | 3.744767  | 4.746125  |
| C | 5.281899  | 1.680487  | 4.022113  | C | -2.290937 | 2.812103  | 4.116064  |
| C | 4.199934  | 1.295614  | 5.038509  | O | -1.749363 | 1.494134  | 3.964019  |
| C | 3.783284  | -0.168411 | 4.846388  | C | -2.841485 | 3.317380  | 2.777961  |
| C | 5.004219  | -1.085939 | 4.908878  | O | -4.092746 | 2.681487  | 2.532420  |
| C | 6.127002  | -0.549626 | 3.998272  | C | -3.007446 | 4.838599  | 2.692270  |
| H | 4.900223  | 1.502458  | 3.010922  | O | -3.109405 | 5.115460  | 1.288400  |
| H | 4.599683  | 1.427076  | 6.052632  | C | -1.806174 | 5.572465  | 3.290737  |
| H | 3.316636  | -0.264395 | 3.855288  | O | -1.597879 | 5.101293  | 4.637243  |
| H | 5.382085  | -1.072367 | 5.941447  | C | -2.004005 | 7.079978  | 3.401961  |
| H | 7.058169  | -1.091562 | 4.192407  | O | -3.154804 | 7.415372  | 4.167775  |
| C | 5.785013  | 3.133915  | 4.080990  | C | -4.093350 | 5.987514  | 0.767523  |
| O | 2.861979  | -0.544004 | 5.869206  | C | -5.064745 | 5.177772  | -0.114466 |
| O | 4.739520  | -2.420526 | 4.500092  | O | -5.625590 | 4.147818  | 0.699589  |
| O | 5.716933  | -0.721970 | 2.663833  | C | -4.308509 | 4.610639  | -1.310924 |
| H | 5.254773  | 3.700070  | 4.848201  | O | -5.241413 | 3.965740  | -2.180977 |
| O | 5.570547  | 3.833020  | 2.855852  | C | -3.498908 | 5.681284  | -2.044234 |
| H | 6.850696  | 3.112870  | 4.342680  | O | -2.652559 | 4.971085  | -2.964065 |
| H | 2.189810  | 0.171679  | 5.939678  | C | -2.628649 | 6.470230  | -1.057363 |
| H | 3.849857  | -2.709229 | 4.787289  | O | -3.478673 | 6.996479  | -0.010485 |
| H | 6.064703  | 3.370956  | 2.143796  | C | -1.841285 | 7.631738  | -1.692897 |
| O | 7.828773  | -0.731124 | -0.334865 | O | -2.425579 | 8.192883  | -2.865908 |
| C | 6.992926  | -0.117664 | 0.671578  | C | -2.711659 | 5.252316  | -4.336858 |
| C | 6.648807  | -1.206047 | 1.696893  | C | -2.738600 | 3.925977  | -5.109633 |
| C | 5.929037  | -2.372941 | 1.008267  | O | -3.869306 | 3.199363  | -4.641902 |
| C | 6.711202  | -2.895265 | -0.193554 | C | -1.419158 | 3.179035  | -4.918701 |
| C | 7.151464  | -1.716384 | -1.088344 | O | -1.443384 | 2.016386  | -5.737332 |
| H | 6.061235  | 0.227153  | 0.210404  | C | -0.219543 | 4.075892  | -5.262059 |
| H | 7.563669  | -1.562513 | 2.188022  | O | 0.962606  | 3.362577  | -4.859147 |
| H | 4.973955  | -1.981888 | 0.645121  | C | -0.305901 | 5.413705  | -4.505022 |
| H | 7.622226  | -3.390754 | 0.171195  | O | -1.595599 | 6.032697  | -4.746503 |
| H | 7.866119  | -2.062235 | -1.841651 | C | 0.740987  | 6.433825  | -4.933336 |
| C | 7.721178  | 1.125356  | 1.213749  | O | 0.764107  | 7.571298  | -4.077373 |
| O | 5.696917  | -3.435796 | 1.932720  | C | 1.962804  | 3.099799  | -5.824267 |
| O | 5.961439  | -3.783529 | -1.014210 | C | 2.282546  | 1.588868  | -5.876771 |
| O | 6.001711  | -1.179860 | -1.702902 | O | 1.043133  | 0.908191  | -5.962575 |
| H | 7.814040  | 1.075765  | 2.299618  | C | 3.149830  | 1.106298  | -4.703783 |

|   |           |           |           |   |           |           |           |
|---|-----------|-----------|-----------|---|-----------|-----------|-----------|
| O | 7.018834  | 2.336303  | 0.936010  | O | 3.720558  | -0.170805 | -4.985475 |
| H | 8.730050  | 1.144975  | 0.781680  | C | 4.336391  | 2.047993  | -4.490036 |
| H | 5.321865  | -3.035800 | 2.749115  | O | 5.019670  | 1.632746  | -3.299344 |
| H | 5.390350  | -4.367496 | -0.478384 | C | 3.869492  | 3.505678  | -4.377990 |
| H | 6.924538  | 2.442615  | -0.036858 | O | 3.131039  | 3.849139  | -5.571514 |
| O | 5.959368  | 0.922564  | -4.717063 | C | 5.023291  | 4.502498  | -4.329767 |
| C | 5.996859  | 0.696768  | -3.290824 | O | 5.841483  | 4.418828  | -5.489553 |
| C | 6.040984  | -0.823593 | -3.085722 | C | 6.393515  | 1.289133  | -3.376064 |
| C | 4.800358  | -1.481867 | -3.706113 | C | 6.590762  | -0.104506 | -2.746089 |
| C | 4.640702  | -1.079333 | -5.170529 | O | 5.778512  | -1.078002 | -3.387303 |
| C | 4.777204  | 0.448940  | -5.325669 | C | 6.324707  | -0.040086 | -1.244723 |
| H | 5.079933  | 1.086669  | -2.834952 | O | 6.666297  | -1.293224 | -0.654686 |
| H | 6.945666  | -1.230720 | -3.556010 | C | 7.134017  | 1.077722  | -0.581404 |
| H | 3.919076  | -1.136252 | -3.149970 | O | 6.636135  | 1.202534  | 0.760662  |
| H | 5.462239  | -1.539281 | -5.738764 | C | 6.973835  | 2.418930  | -1.313613 |
| H | 4.865520  | 0.705877  | -6.385813 | O | 7.204079  | 2.246045  | -2.728123 |
| C | 7.180128  | 1.498043  | -2.722501 | C | 7.999117  | 3.459792  | -0.871785 |
| O | 4.913890  | -2.902120 | -3.611773 | O | 9.329124  | 3.037027  | -1.143391 |
| O | 3.390549  | -1.443266 | -5.738184 | H | 8.480718  | 0.691022  | 1.538141  |
| O | 3.637694  | 1.059903  | -4.762417 | H | 7.601840  | -0.122493 | 3.661844  |
| H | 7.832964  | 0.856723  | -2.128868 | H | 5.962104  | -1.719720 | 2.565107  |
| O | 6.765864  | 2.548050  | -1.850105 | H | 4.842907  | 0.656391  | 2.645093  |
| H | 7.759546  | 1.891788  | -3.567413 | H | 4.520176  | 0.201720  | 5.057312  |
| H | 5.188554  | -3.111405 | -2.691388 | H | 6.277919  | 1.945024  | 4.982396  |
| H | 3.036689  | -2.265562 | -5.342179 | H | 5.888739  | 3.196766  | 2.230144  |
| H | 6.160125  | 3.154925  | -2.330126 | H | 7.518116  | 4.847157  | 2.910151  |
| O | 2.488766  | 4.441025  | -5.631041 | H | 8.015728  | 3.874662  | 4.302247  |
| C | 3.194564  | 3.482307  | -4.811029 | H | 5.438038  | 5.051507  | 4.167598  |
| C | 3.005018  | 2.116334  | -5.484172 | H | 4.916891  | 3.383745  | 5.973355  |
| C | 1.514074  | 1.757200  | -5.531715 | H | 2.815061  | 2.858319  | 7.074420  |
| C | 0.715520  | 2.868515  | -6.212353 | H | 2.887214  | 0.531464  | 6.832420  |
| C | 1.090432  | 4.247415  | -5.631623 | H | 1.857404  | 1.639660  | 4.450907  |
| H | 2.742105  | 3.453533  | -3.813681 | H | 0.632529  | 0.640192  | 5.918471  |
| H | 3.400739  | 2.163832  | -6.507306 | H | 0.910755  | 4.171938  | 5.877998  |
| H | 1.159727  | 1.649898  | -4.496035 | H | 2.474252  | 3.916887  | 3.264847  |
| H | 0.993094  | 2.875921  | -7.276229 | H | 1.037050  | 5.945808  | 3.397819  |
| H | 0.680835  | 5.041449  | -6.263931 | H | 2.766182  | 6.323798  | 3.445309  |
| C | 4.643818  | 3.974586  | -4.649616 | H | 2.484204  | 6.447039  | 5.764258  |
| O | 1.321644  | 0.541927  | -6.251967 | H | -1.158163 | 3.544049  | 5.817021  |
| O | -0.691572 | 2.725718  | -6.072113 | H | -3.126319 | 2.725027  | 4.814715  |
| O | 0.567404  | 4.333772  | -4.326226 | H | -0.835942 | 1.623874  | 3.657777  |
| H | 5.352539  | 3.231756  | -5.017971 | H | -2.122839 | 3.034946  | 1.994532  |
| O | 4.991316  | 4.205458  | -3.285168 | H | -4.511387 | 3.138400  | 1.770254  |
| H | 4.759419  | 4.888071  | -5.246690 | H | -3.917789 | 5.145259  | 3.218264  |
| H | 2.001072  | -0.098444 | -5.943302 | H | -0.921007 | 5.366909  | 2.676422  |
| H | -0.963483 | 1.792324  | -6.169618 | H | -2.149699 | 7.499445  | 2.402943  |
| H | 4.401967  | 4.900724  | -2.919156 | H | -1.094197 | 7.520438  | 3.833112  |
| O | -0.019404 | 7.415871  | -2.416211 | H | -3.036323 | 7.002382  | 5.035921  |
| C | 0.750621  | 6.259691  | -2.816116 | H | -4.628744 | 6.499473  | 1.572721  |
| C | -0.056134 | 5.549989  | -3.910464 | H | -5.856043 | 5.854563  | -0.463105 |
| C | -1.428824 | 5.129905  | -3.373003 | H | -6.145485 | 3.526343  | 0.158987  |
| C | -2.170851 | 6.308541  | -2.746270 | H | -3.586714 | 3.882409  | -0.928277 |
| C | -1.238010 | 7.079293  | -1.785875 | H | -4.755445 | 3.685437  | -2.984737 |
| H | 0.858668  | 5.580598  | -1.963512 | H | -4.159288 | 6.367952  | -2.584805 |
| H | -0.184452 | 6.224825  | -4.766788 | H | -1.907644 | 5.784769  | -0.599845 |
| H | -1.257761 | 4.373445  | -2.598281 | H | -0.821418 | 7.295127  | -1.906831 |
| H | -2.453684 | 7.000260  | -3.552560 | H | -1.776640 | 8.429237  | -0.946584 |
| H | -1.698936 | 8.029256  | -1.497865 | H | -2.161237 | 7.623151  | -3.607767 |
| C | 2.159555  | 6.736489  | -3.211417 | H | -3.594769 | 5.851101  | -4.580583 |
| O | -2.214130 | 4.574608  | -4.429688 | H | -2.856526 | 4.161137  | -6.176418 |
| O | -3.322383 | 5.927671  | -2.003079 | H | -3.822758 | 2.258542  | -4.901930 |
| O | -1.013194 | 6.273149  | -0.653345 | H | -1.320920 | 2.908546  | -3.860340 |
| H | 2.401994  | 6.425971  | -4.228852 | H | -0.539462 | 1.622383  | -5.731917 |
| O | 3.176623  | 6.183530  | -2.377783 | H | -0.200393 | 4.258122  | -6.344546 |
| H | 2.170014  | 7.833389  | -3.174279 | H | -0.195220 | 5.217661  | -3.432512 |
| H | -1.637793 | 3.943782  | -4.917675 | H | 0.560611  | 6.721344  | -5.978562 |
| H | -3.716573 | 5.105931  | -2.357242 | H | 1.728300  | 5.970480  | -4.873996 |
| H | 3.015882  | 6.465258  | -1.449990 | H | -0.031321 | 8.092044  | -4.253331 |
| O | 0.196363  | 7.349740  | 2.643152  | H | 1.620134  | 3.425933  | -6.811122 |
| C | 0.354125  | 6.878764  | 1.286087  | H | 2.871151  | 1.428638  | -6.791784 |
| C | -1.044304 | 6.853070  | 0.653194  | H | 1.129193  | -0.069738 | -5.949357 |
| C | -1.960134 | 5.930200  | 1.466540  | H | 2.546266  | 1.074829  | -3.786227 |

|   |           |           |           |   |           |           |           |
|---|-----------|-----------|-----------|---|-----------|-----------|-----------|
| C | -1.982361 | 6.301937  | 2.944786  | H | 3.084704  | -0.916829 | -4.964340 |
| C | -0.536692 | 6.458769  | 3.460403  | H | 5.010092  | 1.972440  | -5.351310 |
| H | 0.742746  | 5.854570  | 1.299637  | H | 3.234931  | 3.632185  | -3.491647 |
| H | -1.460854 | 7.867798  | 0.611632  | H | 5.662134  | 4.278459  | -3.473374 |
| H | -1.531138 | 4.924744  | 1.393549  | H | 4.609724  | 5.512570  | -4.201669 |
| H | -2.486790 | 7.271246  | 3.062177  | H | 5.251223  | 4.549586  | -6.246559 |
| H | -0.538179 | 6.903378  | 4.460332  | H | 6.725199  | 1.282610  | -4.418559 |
| C | 1.404947  | 7.761876  | 0.591520  | H | 7.636663  | -0.393906 | -2.904432 |
| O | -3.287843 | 5.945600  | 0.945788  | H | 5.003388  | -0.642146 | -3.812298 |
| O | -2.611805 | 5.315342  | 3.755398  | H | 5.257929  | 0.175770  | -1.104800 |
| H | 1.014034  | 8.163881  | -0.344399 | H | 6.625500  | -1.191796 | 0.324239  |
| O | 2.585644  | 7.040198  | 0.242705  | H | 8.195543  | 0.803942  | -0.567986 |
| H | 1.637644  | 8.602950  | 1.257263  | H | 5.961081  | 2.804551  | -1.147226 |
| H | -3.222670 | 5.875060  | -0.032150 | H | 7.924146  | 3.606862  | 0.208328  |
| H | -3.400415 | 4.944801  | 3.314968  | H | 7.772361  | 4.413398  | -1.368956 |
| H | 2.985728  | 6.650497  | 1.051625  | H | 9.356383  | 2.829366  | -2.089385 |
| C | -1.583436 | 2.797824  | -0.264260 | C | -3.520908 | 1.369213  | -0.721005 |
| C | -2.105174 | 2.346483  | 0.945231  | C | -2.712337 | 1.520810  | -1.842271 |
| C | -2.299892 | 0.980948  | 1.143312  | C | -1.446225 | 0.944558  | -1.849773 |
| C | -1.971685 | 0.042422  | 0.161470  | C | -0.981234 | 0.218018  | -0.750645 |
| C | -1.396874 | 0.498226  | -1.043610 | C | -1.831617 | -0.002752 | 0.349719  |
| C | -1.223831 | 1.871293  | -1.240685 | C | -3.095554 | 0.586195  | 0.348659  |
| C | -0.753161 | -0.470558 | -2.014895 | C | -1.439669 | -0.959328 | 1.458961  |
| C | 0.349640  | -1.143522 | -1.242006 | C | -1.175916 | -2.315120 | 0.850302  |
| C | 1.685982  | -0.764583 | -1.346277 | C | -2.051505 | -3.390458 | 1.003634  |
| C | 2.645007  | -1.301998 | -0.485543 | C | -1.801459 | -4.618235 | 0.383158  |
| C | 2.258901  | -2.221105 | 0.489357  | C | -0.667990 | -4.759587 | -0.416759 |
| C | 0.921913  | -2.614815 | 0.597322  | C | 0.213093  | -3.687027 | -0.591714 |
| C | -0.040489 | -2.078403 | -0.262114 | C | -0.024805 | -2.461508 | 0.043199  |
| C | -2.277125 | -1.415686 | 0.485232  | C | 0.483702  | -0.144091 | -0.753174 |
| N | -1.427038 | -2.403658 | -0.205681 | N | 0.861855  | -1.361282 | -0.026731 |
| C | -3.754416 | -1.734783 | 0.181028  | C | 1.253288  | 1.046875  | -0.148849 |
| C | -1.763438 | -3.761139 | 0.213681  | C | 2.294983  | -1.578436 | -0.154212 |
| C | -3.224706 | -4.065544 | -0.090135 | C | 3.025323  | -0.429009 | 0.539805  |
| N | -4.104780 | -3.102188 | 0.593712  | N | 2.696492  | 0.834600  | -0.123050 |
| C | -5.519586 | -3.407209 | 0.325008  | C | 3.346160  | 1.981422  | 0.502790  |
| H | -1.428889 | 3.855597  | -0.441330 | H | -4.489440 | 1.845947  | -0.685979 |
| H | -2.365920 | 3.039088  | 1.737681  | H | -3.061033 | 2.088565  | -2.693742 |
| H | -2.725838 | 0.638507  | 2.081398  | H | -0.795874 | 1.067466  | -2.712203 |
| H | -0.768883 | 2.209672  | -2.167652 | H | -3.753683 | 0.438360  | 1.196558  |
| H | -0.358009 | 0.067774  | -2.879763 | H | -2.237948 | -1.017857 | 2.201607  |
| H | -1.464028 | -1.227173 | -2.354885 | H | -0.530150 | -0.610674 | 1.963344  |
| H | 1.975682  | -0.033503 | -2.096676 | H | -2.932850 | -3.267256 | 1.627031  |
| H | 3.680306  | -0.998429 | -0.589559 | H | -2.486845 | -5.449029 | 0.519206  |
| H | 2.987365  | -2.642381 | 1.174814  | H | -0.474940 | -5.702946 | -0.919773 |
| H | 0.637655  | -3.335503 | 1.355123  | H | 1.069026  | -3.795651 | -1.245931 |
| H | -2.142972 | -1.536262 | 1.576375  | H | 0.806316  | -0.245119 | -1.806142 |
| H | -3.934332 | -1.586299 | -0.897482 | H | 0.854548  | 1.229165  | 0.868874  |
| H | -4.388530 | -1.032542 | 0.727506  | H | 1.043255  | 1.941469  | -0.744526 |
| H | -1.587423 | -3.920887 | 1.289285  | H | 2.613007  | -1.607231 | -1.211712 |
| H | -1.131343 | -4.460753 | -0.335098 | H | 2.561172  | -2.528593 | 0.304487  |
| H | -3.463505 | -5.068839 | 0.271037  | H | 4.104657  | -0.592396 | 0.490898  |
| H | -3.399457 | -4.052902 | -1.174752 | H | 2.737209  | -0.422337 | 1.609029  |
| H | -5.737765 | -3.410744 | -0.753089 | H | 3.002852  | 2.148216  | 1.540979  |
| H | -6.163861 | -2.685367 | 0.833979  | H | 3.125845  | 2.886636  | -0.072776 |
| H | -5.744679 | -4.402332 | 0.721130  | H | 4.426297  | 1.835844  | 0.525227  |



| [ $\beta$ -CD]-[ $\beta$ -CD] DIMER WATER |                |           |           |                                       |                |           |           |
|-------------------------------------------|----------------|-----------|-----------|---------------------------------------|----------------|-----------|-----------|
| [ $\beta$ -CD-CCCW]-[ $\beta$ -CD-CCCW]   |                |           |           | [ $\beta$ -CD-EXP]-[ $\beta$ -CD-EXP] |                |           |           |
| E                                         | -8550.99227908 |           |           | E                                     | -8550.95018374 |           |           |
| Atom                                      | x [Å]          | y [Å]     | z [Å]     | Atom                                  | x [Å]          | y [Å]     | z [Å]     |
| O                                         | 4.815588       | 3.620518  | 4.535495  | C                                     | 0.307051       | 0.321704  | 7.121579  |
| C                                         | 4.631287       | 3.689226  | 3.104087  | C                                     | -0.581667      | -0.886947 | 6.796032  |
| C                                         | 3.582945       | 4.779786  | 2.849135  | O                                     | 0.272607       | -1.909539 | 6.311090  |
| C                                         | 2.260033       | 4.425934  | 3.542339  | C                                     | -1.668771      | -0.485129 | 5.804713  |
| C                                         | 2.485895       | 4.154931  | 5.028251  | O                                     | -2.570983      | -1.575174 | 5.644995  |
| C                                         | 3.661634       | 3.176453  | 5.218105  | C                                     | -2.425137      | 0.760809  | 6.292108  |
| H                                         | 4.239281       | 2.733004  | 2.740805  | O                                     | -3.236452      | 1.176026  | 5.188951  |
| H                                         | 3.952629       | 5.737504  | 3.238796  | C                                     | -1.458827      | 1.888384  | 6.694351  |
| H                                         | 1.865478       | 3.513429  | 3.072368  | O                                     | -0.478536      | 1.383732  | 7.626216  |
| H                                         | 2.766189       | 5.104465  | 5.506748  | C                                     | -2.132473      | 3.061436  | 7.381258  |
| H                                         | 3.939863       | 3.127311  | 6.275582  | O                                     | -1.155637      | 4.090575  | 7.515776  |
| C                                         | 6.012099       | 3.900987  | 2.458803  | C                                     | -4.619812      | 1.396960  | 5.368906  |
| O                                         | 3.262724       | 4.901055  | 1.464722  | C                                     | -5.392664      | 0.555202  | 4.333035  |
| O                                         | 1.335597       | 5.502325  | 3.391601  | O                                     | -4.986390      | -0.798788 | 4.483352  |
| O                                         | 1.364031       | 3.584951  | 5.686496  | C                                     | -5.171194      | 1.095486  | 2.921712  |
| O                                         | 3.254916       | 1.912221  | 4.749683  | O                                     | -6.075269      | 0.436016  | 2.039904  |
| H                                         | 6.015290       | 4.791519  | 1.828803  | C                                     | -5.416751      | 2.605993  | 2.891950  |
| O                                         | 6.390298       | 2.818514  | 1.609404  | O                                     | -5.096805      | 3.060780  | 1.572613  |
| H                                         | 6.744000       | 4.045435  | 3.263839  | C                                     | -4.567139      | 3.317850  | 3.946691  |
| H                                         | 1.354868       | 5.776946  | 2.447099  | O                                     | -4.934990      | 2.768176  | 5.233208  |
| H                                         | 0.523042       | 3.953692  | 5.347049  | C                                     | -4.762348      | 4.839037  | 3.984269  |
| H                                         | 6.415683       | 1.989317  | 2.136311  | O                                     | -6.087120      | 5.273037  | 3.702241  |
| O                                         | 4.808198       | -1.285989 | 5.665407  | C                                     | -6.094757      | 3.719277  | 0.825008  |
| C                                         | 4.624175       | -0.124316 | 4.826203  | C                                     | -6.151990      | 3.094828  | -0.574992 |
| C                                         | 3.574628       | 0.754479  | 5.518581  | O                                     | -6.447437      | 1.718540  | -0.400328 |
| C                                         | 2.251946       | -0.008830 | 5.672631  | C                                     | -4.841068      | 3.345640  | -1.310620 |
| C                                         | 2.477628       | -1.339382 | 6.387585  | O                                     | -4.976797      | 2.896134  | -2.655352 |
| C                                         | 3.654632       | -2.097251 | 5.742441  | C                                     | -4.497841      | 4.838842  | -1.289208 |
| H                                         | 4.233373       | -0.436843 | 3.851735  | O                                     | -3.164008      | 4.949467  | -1.797177 |
| H                                         | 3.943078       | 1.047188  | 6.510657  | C                                     | -4.567392      | 5.440872  | 0.125795  |
| H                                         | 1.858762       | -0.210708 | 4.665731  | O                                     | -5.834986      | 5.109722  | 0.743964  |
| H                                         | 2.756507       | -1.121369 | 7.428670  | C                                     | -4.439304      | 6.954811  | 0.133608  |
| H                                         | 3.932649       | -2.954580 | 6.363544  | O                                     | -5.411816      | 7.511914  | -0.744903 |
| C                                         | 6.004871       | 0.512952  | 4.590756  | C                                     | -2.890405      | 5.861988  | -2.841853 |
| O                                         | 1.326060       | 0.779585  | 6.419033  | C                                     | -2.238311      | 5.096116  | -4.012200 |
| O                                         | 1.356265       | -2.209989 | 6.350969  | O                                     | -3.098319      | 4.019005  | -4.364469 |
| O                                         | 3.249725       | -2.519437 | 4.461451  | C                                     | -0.828399      | 4.638880  | -3.645130 |
| H                                         | 6.007297       | 1.560611  | 4.894644  | O                                     | -0.198619      | 4.138857  | -4.821758 |
| O                                         | 6.384019       | 0.502904  | 3.215102  | C                                     | -0.027734      | 5.812537  | -3.075337 |
| H                                         | 6.736574       | -0.026320 | 5.205910  | O                                     | 1.252034       | 5.303497  | -2.684005 |
| H                                         | 1.345004       | 1.689221  | 6.044744  | C                                     | -0.767348      | 6.448881  | -1.896313 |
| H                                         | 0.514906       | -1.715103 | 6.426017  | O                                     | -2.047119      | 6.904058  | -2.396697 |
| H                                         | 6.410741       | -0.425922 | 2.895093  | C                                     | -0.037784      | 7.640705  | -1.262995 |
| O                                         | 4.807521       | -5.228277 | 2.533902  | O                                     | 0.695060       | 8.436750  | -2.186359 |
| C                                         | 4.621981       | -3.847977 | 2.918554  | C                                     | 2.401509       | 5.853148  | -3.287429 |
| C                                         | 3.570980       | -3.842142 | 4.035973  | C                                     | 3.319842       | 4.710588  | -3.741775 |
| C                                         | 2.249375       | -4.439322 | 3.533387  | O                                     | 2.567093       | 3.903486  | -4.631540 |
| C                                         | 2.476764       | -5.827712 | 2.939129  | C                                     | 3.850818       | 3.946000  | -2.533200 |
| C                                         | 3.655163       | -5.795068 | 1.946022  | O                                     | 4.816210       | 3.001799  | -2.983398 |
| H                                         | 4.231844       | -3.281343 | 2.066083  | C                                     | 4.478168       | 4.907524  | -1.510538 |
| H                                         | 3.938759       | -4.435033 | 4.883858  | O                                     | 4.729924       | 4.135086  | -0.332339 |
| H                                         | 1.856913       | -3.778166 | 2.747215  | C                                     | 3.527886       | 6.070622  | -1.178531 |
| H                                         | 2.754850       | -6.505594 | 3.759079  | O                                     | 3.090431       | 6.708917  | -2.397245 |
| H                                         | 3.934257       | -6.815004 | 1.663385  | C                                     | 4.160586       | 7.159565  | -0.333214 |
| C                                         | 6.001698       | -3.265388 | 3.271735  | O                                     | 3.117648       | 8.048180  | 0.059045  |
| O                                         | 1.322004       | -4.531935 | 4.613826  | C                                     | 6.035517       | 4.076015  | 0.208602  |
| O                                         | 1.356697       | -6.342553 | 2.234043  | C                                     | 6.442257       | 2.599728  | 0.356971  |
| O                                         | 3.251405       | -5.057024 | 0.816720  | O                                     | 6.365575       | 1.998712  | -0.927403 |
| H                                         | 6.002138       | -2.849222 | 4.280063  | C                                     | 5.560937       | 1.912143  | 1.395116  |
| O                                         | 6.381396       | -2.196286 | 2.406202  | O                                     | 6.075699       | 0.606039  | 1.637231  |
| H                                         | 6.734093       | -4.082023 | 3.235288  | C                                     | 5.548015       | 2.713295  | 2.699380  |
| H                                         | 1.339792       | -3.672154 | 5.091638  | O                                     | 4.558715       | 2.103720  | 3.537195  |
| H                                         | 0.514578       | -6.093720 | 2.666876  | C                                     | 5.215922       | 4.194374  | 2.459950  |
| H                                         | 6.410249       | -2.525826 | 1.480766  | O                                     | 6.102202       | 4.730425  | 1.455327  |
| O                                         | 4.813984       | -5.238392 | -2.500786 | C                                     | 5.369342       | 5.048614  | 3.707071  |
| C                                         | 4.626535       | -4.678773 | -1.181959 | O                                     | 6.672958       | 4.858318  | 4.250226  |
| C                                         | 3.574577       | -5.548918 | -0.482268 | C                                     | 4.898289       | 1.755312  | 4.864678  |

|   |          |           |           |   |           |           |           |
|---|----------|-----------|-----------|---|-----------|-----------|-----------|
| C | 2.254104 | -5.528405 | -1.264367 | C | 4.604463  | 0.255436  | 5.078717  |
| C | 2.483731 | -5.929655 | -2.719913 | O | 5.289901  | -0.474093 | 4.068080  |
| C | 3.662661 | -5.132490 | -3.311991 | C | 3.101118  | -0.010020 | 5.089978  |
| H | 4.236423 | -3.659006 | -1.270830 | O | 2.886180  | -1.355601 | 5.508312  |
| H | 3.942096 | -6.581555 | -0.416771 | C | 2.404030  | 0.958181  | 6.048472  |
| H | 1.861490 | -4.501567 | -1.238334 | O | 0.997924  | 0.705843  | 5.954531  |
| H | 2.762325 | -6.993259 | -2.738082 | C | 2.745008  | 2.407337  | 5.692912  |
| H | 3.943127 | -5.547383 | -4.285281 | O | 4.182299  | 2.539888  | 5.795862  |
| C | 6.005307 | -4.591744 | -0.504320 | C | 2.092580  | 3.452723  | 6.606797  |
| O | 1.326058 | -6.430928 | -0.664270 | O | 1.954059  | 3.041222  | 7.961446  |
| O | 1.364832 | -5.699937 | -3.563738 | H | 1.008590  | 0.067422  | 7.921333  |
| O | 3.258641 | -3.789505 | -3.439518 | H | -1.064153 | -1.205601 | 7.731110  |
| H | 6.004216 | -5.120077 | 0.450031  | H | -0.225887 | -2.606054 | 5.835410  |
| O | 6.385172 | -3.248494 | -0.208226 | H | -1.191599 | -0.233750 | 4.846956  |
| H | 6.738470 | -5.073047 | -1.164208 | H | -3.354307 | -1.246865 | 5.145153  |
| H | 1.342592 | -6.268398 | 0.305870  | H | -3.055254 | 0.482430  | 7.147273  |
| H | 0.522091 | -5.883314 | -3.100469 | H | -0.951264 | 2.247868  | 5.791614  |
| H | 6.414493 | -2.730512 | -1.042910 | H | -2.507655 | 2.733653  | 8.361355  |
| O | 4.823311 | -1.308012 | -5.647354 | H | -2.986773 | 3.388977  | 6.776102  |
| C | 4.634363 | -1.990427 | -4.387891 | H | -1.548249 | 4.811401  | 8.025537  |
| C | 3.583310 | -3.080469 | -4.633539 | H | -4.925871 | 1.117490  | 6.381842  |
| C | 2.263245 | -2.457046 | -5.107381 | H | -6.462667 | 0.652957  | 4.565260  |
| C | 2.494386 | -1.569145 | -6.328260 | H | -5.205149 | -1.325626 | 3.687500  |
| C | 3.672270 | -0.608448 | -6.072154 | H | -4.130240 | 0.903583  | 2.623704  |
| H | 4.242940 | -1.285387 | -3.646458 | H | -6.067793 | 0.913348  | 1.177212  |
| H | 3.952596 | -3.775324 | -5.399340 | H | -6.471160 | 2.806944  | 3.111247  |
| H | 1.868807 | -1.837394 | -4.289064 | H | -3.503645 | 3.116512  | 3.771225  |
| H | 2.774844 | -2.217997 | -7.170586 | H | -4.046403 | 5.293799  | 3.290597  |
| H | 3.953945 | -0.105927 | -7.002836 | H | -4.501239 | 5.179539  | 4.991933  |
| C | 6.012775 | -2.465308 | -3.895608 | H | -6.124980 | 5.450031  | 2.747225  |
| O | 1.336413 | -3.489572 | -5.440322 | H | -7.069061 | 3.629326  | 1.314398  |
| O | 1.375564 | -0.766989 | -6.676880 | H | -6.962710 | 3.589737  | -1.128317 |
| O | 3.266068 | 0.328430  | -5.102412 | H | -6.239061 | 1.199484  | -1.205406 |
| H | 6.012465 | -3.541018 | -3.714398 | H | -4.038521 | 2.796901  | -0.798092 |
| O | 6.390178 | -1.859686 | -2.659868 | H | -4.216593 | 3.252095  | -3.171827 |
| H | 6.746926 | -2.248213 | -4.682063 | H | -5.198522 | 5.374294  | -1.938381 |
| H | 1.352152 | -4.146660 | -4.708304 | H | -3.752666 | 5.021430  | 0.728013  |
| H | 0.532886 | -1.243810 | -6.532092 | H | -3.421600 | 7.209169  | -0.184735 |
| H | 6.418875 | -0.884087 | -2.774828 | H | -4.577972 | 7.311523  | 1.164269  |
| O | 4.827831 | 3.602751  | -4.536698 | H | -5.212585 | 8.451987  | -0.843704 |
| C | 4.639027 | 2.192613  | -4.284753 | H | -3.812382 | 6.348150  | -3.174099 |
| C | 3.590287 | 1.704202  | -5.292161 | H | -2.154072 | 5.796686  | -4.855076 |
| C | 2.269450 | 2.462720  | -5.102737 | H | -2.625830 | 3.349723  | -4.899240 |
| C | 2.499727 | 3.971023  | -5.169346 | H | -0.893814 | 3.852896  | -2.878678 |
| C | 3.675956 | 4.370609  | -4.256791 | H | 0.758375  | 4.007621  | -4.625372 |
| H | 4.245509 | 2.052837  | -3.272027 | H | 0.097348  | 6.579074  | -3.847643 |
| H | 3.961571 | 1.869606  | -6.312205 | H | -0.944453 | 5.701470  | -1.113362 |
| H | 1.873368 | 2.209085  | -4.108750 | H | 0.621477  | 7.272114  | -0.471569 |
| H | 2.781559 | 4.225270  | -6.201383 | H | -0.799651 | 8.271374  | -0.789649 |
| H | 3.957547 | 5.411632  | -4.444037 | H | 1.621795  | 8.150908  | -2.114624 |
| C | 6.017761 | 1.512100  | -4.345971 | H | 2.128015  | 6.476861  | -4.143379 |
| O | 1.344563 | 2.078839  | -6.119203 | H | 4.173615  | 5.161773  | -4.267529 |
| O | 1.379773 | 4.742918  | -4.761157 | H | 2.979141  | 3.024626  | -4.764926 |
| O | 3.267548 | 4.196661  | -2.920372 | H | 3.008864  | 3.436762  | -2.042896 |
| H | 6.019078 | 0.699799  | -5.074043 | H | 5.264348  | 2.623290  | -2.190449 |
| O | 6.392578 | 0.923559  | -3.101225 | H | 5.419219  | 5.297790  | -1.920087 |
| H | 6.752449 | 2.262477  | -4.665010 | H | 2.658079  | 5.668018  | -0.646113 |
| H | 1.360919 | 1.096850  | -6.176583 | H | 4.925193  | 7.676055  | -0.930904 |
| H | 0.537778 | 4.331912  | -5.044983 | H | 4.652483  | 6.700966  | 0.533478  |
| H | 6.420172 | 1.621795  | -2.410182 | H | 3.519881  | 8.801979  | 0.510102  |
| O | 4.824299 | 5.795978  | -0.005086 | H | 6.744232  | 4.597934  | -0.442003 |
| C | 4.637609 | 4.720026  | -0.951193 | H | 7.479823  | 2.579447  | 0.719286  |
| C | 3.589876 | 5.202727  | -1.962413 | H | 6.339205  | 1.020916  | -0.863370 |
| C | 2.267787 | 5.526376  | -1.253067 | H | 4.533661  | 1.857491  | 1.007446  |
| C | 2.495815 | 6.518618  | -0.114679 | H | 5.658453  | 0.261309  | 2.461022  |
| C | 3.671140 | 6.054813  | 0.768209  | H | 6.535423  | 2.644289  | 3.167885  |
| H | 4.244059 | 3.840557  | -0.429987 | H | 4.178328  | 4.278957  | 2.113570  |
| H | 3.961098 | 6.103904  | -2.468157 | H | 4.594061  | 4.748046  | 4.421427  |
| H | 1.871685 | 4.590679  | -0.832615 | H | 5.198683  | 6.098948  | 3.431935  |
| H | 2.777602 | 7.484334  | -0.558694 | H | 6.694024  | 5.287318  | 5.115444  |
| H | 3.951087 | 6.850336  | 1.465926  | H | 5.955313  | 1.963993  | 5.053787  |
| C | 6.017437 | 4.344842  | -1.519612 | H | 4.999519  | -0.016656 | 6.067810  |

|   |           |           |           |   |           |           |           |
|---|-----------|-----------|-----------|---|-----------|-----------|-----------|
| O | 1.343976  | 6.081494  | -2.188172 | H | 4.934498  | -1.381907 | 3.985727  |
| O | 1.374573  | 6.679781  | 0.741818  | H | 2.700897  | 0.148331  | 4.077892  |
| H | 6.019829  | 4.406526  | -2.608719 | H | 1.923619  | -1.471899 | 5.685180  |
| O | 6.393701  | 3.005497  | -1.202024 | H | 2.748167  | 0.771611  | 7.071436  |
| H | 6.750789  | 5.063486  | -1.131826 | H | 2.447084  | 2.622982  | 4.659437  |
| H | 1.361896  | 5.514433  | -2.991894 | H | 1.118988  | 3.728929  | 6.191377  |
| H | 0.533295  | 6.645423  | 0.242300  | H | 2.727358  | 4.346330  | 6.579050  |
| H | 6.420102  | 2.901322  | -0.225145 | H | 1.033355  | 2.744738  | 8.061670  |
| O | -4.808163 | 5.541095  | -1.745252 | C | 0.259074  | -0.321063 | -7.123619 |
| C | -4.624125 | 4.799818  | -0.518777 | C | -0.628582 | 0.886851  | -6.792458 |
| C | -3.574590 | 5.561821  | 0.300443  | O | 0.227910  | 1.910251  | -6.313213 |
| C | -2.251939 | 5.652935  | -0.472932 | C | -1.708978 | 0.484205  | -5.794140 |
| C | -2.477657 | 6.256668  | -1.857485 | O | -2.611265 | 1.573443  | -5.629045 |
| C | -3.654592 | 5.551603  | -2.560046 | C | -2.467260 | -0.762620 | -6.276299 |
| H | -4.233263 | 3.803067  | -0.750555 | C | -3.270661 | -1.178566 | -5.167622 |
| H | -3.943085 | 6.574493  | 0.511171  | O | -1.502545 | -1.889288 | -6.684912 |
| H | -1.858746 | 4.632892  | -0.591801 | O | -0.528803 | -1.383769 | -7.623122 |
| H | -2.756554 | 7.312092  | -1.725310 | C | -2.179471 | -3.063037 | -7.367430 |
| H | -3.932631 | 6.100487  | -3.465310 | O | -1.202461 | -4.091180 | -7.508117 |
| C | -6.004792 | 4.617266  | 0.135622  | C | -4.654930 | -1.401162 | -5.338226 |
| O | -3.254775 | 4.890250  | 1.517233  | C | -5.421698 | -0.560135 | -4.297241 |
| O | -1.326044 | 6.461262  | 0.251814  | O | -5.017892 | 0.794256  | -4.450520 |
| O | -1.356288 | 6.148962  | -2.722187 | C | -5.190157 | -1.100088 | -2.887409 |
| O | -3.249524 | 4.240396  | -2.875958 | O | -6.089243 | -0.441787 | -1.999533 |
| H | -6.007144 | 5.005761  | 1.154933  | C | -5.433767 | -2.610879 | -2.855899 |
| O | -6.383997 | 3.245416  | 0.238080  | O | -5.104505 | -3.064879 | -1.538605 |
| H | -6.736502 | 5.186332  | -0.452073 | C | -4.590573 | -3.321962 | -3.916302 |
| H | -1.345246 | 6.162767  | 1.189043  | O | -4.967643 | -2.772726 | -5.200329 |
| H | -0.514963 | 6.264607  | -2.235112 | C | -4.784566 | -4.843324 | -3.952536 |
| H | -6.410684 | 2.850650  | -0.661512 | O | -6.107280 | -5.278468 | -3.662669 |
| O | -4.807176 | 2.097485  | -5.417933 | C | -6.096294 | -3.725492 | -0.784694 |
| C | -4.621759 | 2.594002  | -4.073789 | C | -6.145427 | -3.101651 | 0.615876  |
| C | -3.570593 | 3.708018  | -4.159411 | O | -6.444110 | -1.725727 | 0.443644  |
| C | -2.248984 | 3.158063  | -4.713211 | C | -4.829445 | -3.350794 | 1.343111  |
| C | -2.476277 | 2.452160  | -6.048312 | O | -4.957457 | -2.902172 | 2.688892  |
| C | -3.654796 | 1.465162  | -5.934604 | C | -4.483988 | -4.843462 | 1.318702  |
| H | -4.231791 | 1.790814  | -3.439109 | O | -3.146916 | -4.952388 | 1.818444  |
| H | -3.938155 | 4.504473  | -4.819879 | C | -4.561320 | -5.444582 | -0.096274 |
| H | -1.856715 | 2.428613  | -3.989861 | O | -5.833557 | -5.115477 | -0.705934 |
| H | -2.754144 | 3.213886  | -6.791099 | C | -4.430284 | -6.958226 | -0.106098 |
| H | -3.933784 | 1.100052  | -6.928055 | O | -5.396341 | -7.517932 | 0.777822  |
| C | -6.001543 | 2.993938  | -3.522349 | C | -2.865730 | -5.864675 | 2.861327  |
| O | -1.321411 | 4.227157  | -4.893785 | C | -2.206707 | -5.098229 | 4.027394  |
| O | -1.356299 | 1.707044  | -6.503458 | O | -3.065400 | -4.021966 | 4.385451  |
| O | -3.251131 | 0.399992  | -5.106611 | C | -0.799687 | -4.639635 | 3.651022  |
| H | -6.001947 | 4.032948  | -3.190056 | O | -0.162512 | -4.138991 | 4.823427  |
| O | -6.381690 | 2.218816  | -2.386143 | C | -0.001662 | -5.812543 | 3.076035  |
| H | -6.733758 | 2.890927  | -4.333442 | O | 1.274970  | -5.302267 | 2.676134  |
| H | -1.339431 | 4.773946  | -4.076133 | C | -0.748342 | -6.449838 | 1.901995  |
| H | -0.514114 | 2.158618  | -6.290717 | O | -2.024464 | -6.906044 | 2.410775  |
| H | -6.410147 | 1.269497  | -2.638754 | C | -0.021849 | -7.641270 | 1.264342  |
| O | -4.814115 | -2.921012 | -5.015932 | O | 0.718045  | -8.436081 | 2.183104  |
| C | -4.626465 | -1.560871 | -4.566053 | C | 2.428985  | -5.850710 | 3.271869  |
| C | -3.574518 | -0.934829 | -5.490570 | C | 3.349289  | -4.707237 | 3.719909  |
| C | -2.254089 | -1.712805 | -5.406481 | O | 2.601791  | -3.900756 | 4.614645  |
| C | -2.483979 | -3.196320 | -5.687095 | C | 3.871421  | -3.942244 | 2.507741  |
| C | -3.662922 | -3.721017 | -4.844120 | O | 4.839073  | -2.997230 | 2.951332  |
| H | -4.236361 | -1.566095 | -3.542444 | C | 4.492631  | -4.903257 | 1.480858  |
| H | -3.942408 | -0.953937 | -6.524951 | O | 4.735646  | -4.130572 | 0.300998  |
| H | -1.861133 | -1.602704 | -4.385367 | C | 3.541233  | -6.067245 | 1.155387  |
| H | -2.762623 | -3.301410 | -6.745615 | O | 3.112724  | -6.705908 | 2.377094  |
| H | -3.943522 | -4.724856 | -5.178201 | C | 4.169343  | -7.155508 | 0.305812  |
| C | -6.005151 | -0.878206 | -4.534742 | O | 3.124836  | -8.045392 | -0.079273 |
| O | -1.326261 | -1.188812 | -6.355432 | C | 6.037413  | -4.070646 | -0.249026 |
| O | -1.365184 | -4.018690 | -5.389228 | C | 6.442084  | -2.594063 | -0.400165 |
| O | -3.258870 | -3.738585 | -3.495224 | O | 6.373952  | -1.993244 | 0.884783  |
| H | -6.004127 | 0.029527  | -5.139717 | C | 5.553069  | -1.907093 | -1.432139 |
| O | -6.384588 | -0.472821 | -3.220219 | O | 6.065125  | -0.600599 | -1.677899 |
| H | -6.738495 | -1.575310 | -4.960046 | C | 5.531603  | -2.708273 | -2.736295 |
| H | -1.342679 | -0.208600 | -6.272996 | O | 4.536107  | -2.099291 | -3.567183 |
| H | -0.522474 | -3.572106 | -5.610250 | C | 5.202181  | -4.189565 | -2.494572 |
| H | -6.413867 | -1.262211 | -2.635539 | O | 6.095887  | -4.724953 | -1.496186 |

|   |           |           |           |   |           |           |           |
|---|-----------|-----------|-----------|---|-----------|-----------|-----------|
| O | -4.823420 | -5.736011 | -0.841465 | C | 5.347611  | -5.043818 | -3.742626 |
| C | -4.634381 | -4.536546 | -1.624506 | O | 6.647580  | -4.853050 | -4.294261 |
| C | -3.583565 | -4.870660 | -2.690995 | C | 4.866246  | -1.750693 | -4.896994 |
| C | -2.263423 | -5.291944 | -2.031004 | C | 4.569651  | -0.251082 | -5.109094 |
| C | -2.494428 | -6.435990 | -1.046025 | O | 5.261241  | 0.478985  | -4.103053 |
| C | -3.672344 | -6.102227 | -0.109543 | C | 3.066022  | 0.013121  | -5.110369 |
| H | -4.242662 | -3.740091 | -0.982466 | O | 2.847162  | 1.358459  | -5.527463 |
| H | -3.952951 | -5.690752 | -3.320828 | C | 2.363435  | -0.955825 | -6.064072 |
| H | -1.868950 | -4.425585 | -1.480524 | O | 0.957790  | -0.704521 | -5.961001 |
| H | -2.774778 | -7.328712 | -1.623627 | C | 2.707952  | -2.404619 | -5.710402 |
| H | -3.954060 | -6.988771 | 0.467315  | O | 4.144613  | -2.536021 | -5.823181 |
| C | -6.012731 | -4.084334 | -2.137810 | C | 2.050110  | -3.450851 | -6.619370 |
| O | -1.336644 | -5.708358 | -3.032826 | O | 1.902062  | -3.040068 | -7.973231 |
| O | -1.375583 | -6.717467 | -0.217943 | H | 0.955238  | -0.066204 | -7.927876 |
| O | -3.266186 | -5.059097 | 0.744872  | H | -1.117343 | 1.204926  | -7.724477 |
| H | -6.012561 | -3.992137 | -3.224744 | H | -0.268012 | 2.606100  | -5.833907 |
| O | -6.389487 | -2.802831 | -1.635723 | H | -1.225487 | 0.233640  | -4.839347 |
| H | -6.747145 | -4.850001 | -1.856712 | H | -3.391130 | 1.244509  | -5.124241 |
| H | -1.352346 | -5.032607 | -3.747663 | H | -3.103444 | -0.484962 | -7.127186 |
| H | -0.532902 | -6.612520 | -0.705092 | H | -0.988783 | -2.248280 | -5.785494 |
| H | -6.418131 | -2.837207 | -0.653968 | H | -2.561234 | -2.735701 | -8.345132 |
| O | -4.828041 | -4.226770 | 3.961660  | H | -3.029531 | -3.391404 | -6.756781 |
| C | -4.639241 | -4.091298 | 2.535598  | H | -1.597633 | -4.812500 | -8.015187 |
| C | -3.590536 | -5.135435 | 2.131507  | H | -4.968181 | -1.122090 | -6.349064 |
| C | -2.269686 | -4.884447 | 2.871906  | H | -6.493138 | -0.659084 | -4.522202 |
| C | -2.499903 | -4.826909 | 4.380587  | H | -5.231282 | 1.320885  | -3.653067 |
| C | -3.676183 | -3.884685 | 4.703940  | H | -4.147509 | -0.906885 | -2.596289 |
| H | -4.245634 | -3.093493 | 2.313204  | H | -6.075727 | -0.919405 | -1.137094 |
| H | -3.961846 | -6.138446 | 2.380084  | H | -6.489423 | -2.812959 | -3.068034 |
| H | -1.873569 | -3.914678 | 2.537482  | H | -3.526113 | -3.119592 | -3.748002 |
| H | -2.781562 | -5.834601 | 4.718839  | H | -4.064231 | -5.297341 | -3.262932 |
| H | -3.957697 | -3.985857 | 5.756802  | H | -4.529038 | -5.183757 | -4.961651 |
| C | -6.018074 | -4.207763 | 1.862464  | H | -6.138990 | -5.456202 | -2.707571 |
| O | -1.344872 | -5.929058 | 2.572780  | H | -7.073950 | -3.637074 | -1.267641 |
| O | -1.379886 | -4.356572 | 5.116175  | H | -6.951807 | -3.597966 | 1.174263  |
| O | -3.267983 | -2.566956 | 4.420950  | H | -6.230619 | -1.206773 | 1.247360  |
| H | -6.019785 | -4.999785 | 1.112370  | H | -4.030974 | -2.800555 | 0.825839  |
| O | -6.392724 | -3.015205 | 1.174180  | H | -4.193623 | -3.257386 | 3.200509  |
| H | -6.752715 | -4.464197 | 2.636519  | H | -5.179862 | -5.380536 | 1.971706  |
| H | -1.361129 | -6.066821 | 1.598813  | H | -3.751345 | -5.023035 | -0.703420 |
| H | -0.537966 | -4.673679 | 4.730138  | H | -3.410157 | -7.210792 | 0.205863  |
| H | -6.420346 | -2.269415 | 1.813617  | H | -4.574427 | -7.314412 | -1.136193 |
| O | -4.824388 | 0.469393  | 5.776922  | H | -5.194616 | -8.457670 | 0.874738  |
| C | -4.637774 | -0.561381 | 4.781778  | H | -3.785116 | -6.351613 | 3.199580  |
| C | -3.590055 | -1.529874 | 5.345372  | H | -2.116276 | -5.798805 | 4.869622  |
| C | -2.267963 | -0.796396 | 5.609634  | H | -2.589771 | -3.351941 | 4.916509  |
| C | -2.495809 | 0.419139  | 6.505707  | H | -0.870945 | -3.853762 | 2.884978  |
| C | -3.671183 | 1.261253  | 5.971587  | H | 0.792985  | -4.006747 | 4.620540  |
| H | -4.244169 | -0.113648 | 3.862753  | H | 0.129324  | -6.578827 | 3.847608  |
| H | -3.961132 | -1.960269 | 6.284948  | H | -0.931205 | -5.702783 | 1.120041  |
| H | -1.872269 | -0.453595 | 4.642606  | H | 0.631590  | -7.272470 | 0.468194  |
| H | -2.777406 | 0.055462  | 7.504516  | H | -0.786300 | -8.272980 | 0.796587  |
| H | -3.951079 | 2.021663  | 6.707473  | H | 1.643931  | -8.149074 | 2.105279  |
| C | -6.017576 | -1.158481 | 4.454121  | H | 2.161910  | -6.474658 | 4.129674  |
| O | -1.343802 | -1.682928 | 6.238857  | H | 4.207021  | -5.157570 | 4.239915  |
| O | -1.374501 | 1.285866  | 6.596089  | H | 3.014068  | -3.021589 | 4.745324  |
| O | -3.262804 | 1.861093  | 4.764723  | H | 3.025738  | -3.433724 | 2.023138  |
| H | -6.020074 | -2.238872 | 4.604724  | H | 5.281580  | -2.618436 | 2.155371  |
| O | -6.393544 | -0.951514 | 3.093214  | H | 5.436800  | -5.292670 | 1.883975  |
| H | -6.751033 | -0.713089 | 5.138441  | H | 2.667415  | -5.665563 | 0.628876  |
| H | -1.361583 | -2.530145 | 5.739106  | H | 4.938678  | -7.671037 | 0.898265  |
| H | -0.533232 | 0.785190  | 6.602850  | H | 4.654747  | -6.696346 | -0.564236 |
| H | -6.419778 | 0.013580  | 2.909447  | H | 3.524716  | -8.797546 | -0.535152 |
| O | -4.815571 | 4.816782  | 3.237219  | H | 6.750976  | -4.592087 | 0.396649  |
| C | -4.631231 | 3.395815  | 3.422854  | H | 7.477096  | -2.573063 | -0.769685 |
| C | -3.582948 | 3.230951  | 4.530636  | H | 6.346151  | -1.015464 | 0.821102  |
| C | -2.260050 | 3.892988  | 4.121401  | H | 4.528470  | -1.853193 | -1.037333 |
| C | -2.486007 | 5.351733  | 3.729703  | H | 5.641855  | -0.256223 | -2.498759 |
| C | -3.661598 | 5.460717  | 2.738769  | H | 6.515658  | -2.638612 | -3.211689 |
| H | -4.239240 | 2.955414  | 2.499593  | H | 4.167098  | -4.274846 | -2.140929 |
| H | -3.952679 | 3.697607  | 5.453245  | H | 4.567533  | -4.743587 | -4.451880 |
| H | -1.865305 | 3.350053  | 3.250433  | H | 5.179157  | -6.094200 | -3.466301 |

|   |           |          |          |   |          |           |           |
|---|-----------|----------|----------|---|----------|-----------|-----------|
| H | -2.766572 | 5.906379 | 4.636795 | H | 6.663017 | -5.281476 | -5.159877 |
| H | -3.939818 | 6.510565 | 2.602857 | H | 5.922149 | -1.958428 | -5.093302 |
| C | -6.012037 | 2.770079 | 3.686726 | H | 4.957836 | 0.021347  | -6.100810 |
| O | -1.335761 | 3.830973 | 5.206681 | H | 4.905705 | 1.386524  | -4.018311 |
| O | -1.364131 | 5.961314 | 3.107976 | H | 2.672627 | -0.145426 | -4.095643 |
| H | -6.015160 | 2.215080 | 4.625845 | H | 1.883391 | 1.473839  | -5.698181 |
| O | -6.390226 | 1.834966 | 2.677361 | H | 2.700761 | -0.769234 | -7.089302 |
| H | -6.743910 | 3.584263 | 3.764776 | H | 2.417319 | -2.620190 | -4.674838 |
| H | -1.354936 | 2.912138 | 5.557754 | H | 1.079575 | -3.727562 | -6.197191 |
| H | -0.523159 | 5.653113 | 3.503225 | H | 2.685693 | -4.344002 | -6.595503 |
| H | -6.415782 | 2.292315 | 1.807872 | H | 0.980293 | -2.744928 | -8.067422 |
